# Supplementary material
Source: publisher figshare collection journal article supplement (https://karger.figshare.com/ndownloader/files/18055550)
Supplement: Supplementary file 1 [file 18055550]

## Sheet: NearestEnhancers
Cluster C		CS16_GainEnh	NearestGene		NeuronFate	NeuronMigration
CRABP1		CS16_HsGE01	ACTRT2		PAX7	ARX
MAB21L2		CS16_HsGE02	ACTRT2		ISL1	ITGA3
EN2		CS16_HsGE03	VAMP3		NOTCH3	PAFAH1B1
OTX2		CS16_HsGE04	VAMP3		TGFB2	CDKL5
NTN1		CS16_HsGE05	VAMP3		GLI3	CELSR3
IRX1		CS16_HsGE06	VAMP3		TGFBR1	FYN
COL1A1		CS16_HsGE07	VAMP3		ID2	SDCCAG8
EN1		CS16_HsGE08	VAMP3		WNT1	NTN1
PAX5		CS16_HsGE13	SPSB1		BMP4	ASPM
SIX2		CS16_HsGE14	SPSB1		PAX3	MARK2
PRTG		CS16_HsGE16	CASZ1		ASCL1	NDE1
TWIST1		CS16_HsGE17	CASZ1		SMAD4	SEMA3A
OLIG3		CS16_HsGE19	DHRS3		NOTCH1	CELSR1
IRX3		CS16_HsGE20	DHRS3		NRG1	TOP2B
EBF3		CS16_HsGE21	DHRS3		ISL2	DCX
SHH		CS16_HsGE22	TMEM51		GBX1	FGFR1
NKX6-1		CS16_HsGE23	TMEM51		OTX2	PSEN1
GATA3		CS16_HsGE24	TMEM51		OLIG1	MEF2C
WNT4		CS16_HsGE25	TMEM51		OLIG2	BAX
BARHL1		CS16_HsGE26	TMEM51			NRCAM
GREB1		CS16_HsGE28	EPHA2			SEMA6A
FZD10		CS16_HsGE29	EPHA2			NRP1
UNCX		CS16_HsGE35	WNT4			FZD3
MSX1		CS16_HsGE36	WNT4			GATA3
HMGA2		CS16_HsGE37	WNT4			CXCL12
NKX6-2		CS16_HsGE38	WNT4			MAPK8
FOXA2		CS16_HsGE39	WNT4			YWHAE
PAX3		CS16_HsGE40	WNT4			PHOX2B
FOXA1		CS16_HsGE41	WNT4			RAPGEF2
DMBX1		CS16_HsGE43	ID3			MDGA1
GBX2		CS16_HsGE44	RUNX3			PEX7
ID3		CS16_HsGE45	RUNX3			SRF
LEF1		CS16_HsGE46	RUNX3			SATB2
IRX5		CS16_HsGE51	SYNC			NEUROD4
FOXC1		CS16_HsGE52	SYNC			USP9X
LIN28B		CS16_HsGE59	RSPO1			BARHL1
ZNF503		CS16_HsGE63	SLC2A1			FEZF1
CCND1		CS16_HsGE64	SLC2A1			FGF13
WNT5A		CS16_HsGE65	SLC2A1			MATN2
PRRX2		CS16_HsGE69	DMBX1			MYH10
LMX1B		CS16_HsGE70	DMBX1			DCLK1
TMEM132C		CS16_HsGE73	FOXD2			ELP3
EBF1		CS16_HsGE74	FOXD2			TUBB2B
ZFHX3		CS16_HsGE75	FOXD2			ASCL1
COL18A1		CS16_HsGE76	FOXD2			BARHL2
SLC2A1		CS16_HsGE77	FOXD2			GFRA3
LGR4		CS16_HsGE78	FOXD2			DCDC2
ENPP2		CS16_HsGE79	FOXD2			NTRK2
EFNA5		CS16_HsGE80	TRABD2B			KIRREL3
APCDD1		CS16_HsGE81	TRABD2B			GPM6A
SLIT2		CS16_HsGE82	TRABD2B			ASTN1
RSPO1		CS16_HsGE83	TRABD2B			SPOCK1
SDK2		CS16_HsGE84	TRABD2B			ROBO3
JAG1		CS16_HsGE85	TRABD2B			PCNT
FOXB1		CS16_HsGE86	TRABD2B			PEX13
GATA2		CS16_HsGE89	JUN			DISC1
BAMBI		CS16_HsGE90	JUN			CCKAR
MECOM		CS16_HsGE91	FGGY			APBB2
COL4A2		CS16_HsGE92	FGGY			PITX2
ARL4A		CS16_HsGE93	FGGY			TLX3
ZIC4		CS16_HsGE99	CDC7			TBX20
SDC1		CS16_HsGE100	CDC7			CDK5
SOX13		CS16_HsGE101	CDC7			FAT3
TENM3		CS16_HsGE102	CDC7			DRGX
PTCH1		CS16_HsGE103	CDC7			DDIT4
ACKR3		CS16_HsGE104	TGFBR3			PTK2
ZNF521		CS16_HsGE105	TGFBR3			CDK5R2
ZNF618		CS16_HsGE106	TGFBR3			ATOH1
DLK1		CS16_HsGE107	BCAR3			NDNF
HBE1		CS16_HsGE108	BCAR3			FBXO45
LUM		CS16_HsGE109	BCAR3			NR2F1
COL3A1		CS16_HsGE110	BCAR3			CDK5R1
OTP		CS16_HsGE111	BCAR3			NEUROG2
WNT8B		CS16_HsGE112	BCAR3			CNTN2
C1QL4		CS16_HsGE121	PDE4DIP			KATNA1
MAB21L1		CS16_HsGE122	PDE4DIP			DNER
FGF17		CS16_HsGE123	PDE4DIP
NEFM		CS16_HsGE134	IGFN1
PHOX2B		CS16_HsGE135	IGFN1
CNPY1		CS16_HsGE137	SHISA4
GPC3		CS16_HsGE138	SHISA4
FEZF1		CS16_HsGE141	SOX13
CAPN6		CS16_HsGE142	SOX13
NKX2-1		CS16_HsGE145	NENF
SULF1		CS16_HsGE146	NENF
BARHL2		CS16_HsGE147	NENF
TAC1		CS16_HsGE151	SMYD2
IGDCC3		CS16_HsGE152	SMYD2
P2RX3		CS16_HsGE153	SRP9
PRPH		CS16_HsGE154	SRP9
LIN28A		CS16_HsGE156	C1orf95
COL2A1		CS16_HsGE157	C1orf95
MSX2		CS16_HsGE160	IRF2BP2
MMRN1		CS16_HsGE161	IRF2BP2
SIX3		CS16_HsGE166	KIF26B
WNT1		CS16_HsGE167	KIF26B
LHX5		CS16_HsGE169	IDI1
SNCG		CS16_HsGE170	IDI1
SHISA3		CS16_HsGE171	ADARB2
ID1		CS16_HsGE172	ADARB2
LMX1A		CS16_HsGE173	ADARB2
RSPO2		CS16_HsGE174	ADARB2
FGF8		CS16_HsGE175	CALML5
FRZB		CS16_HsGE176	CALML5
TFAP2B		CS16_HsGE177	CALML3
NDNF		CS16_HsGE178	CALML3
PLP1		CS16_HsGE181	GATA3
POU4F1		CS16_HsGE189	BAMBI
S100A11		CS16_HsGE190	BAMBI
SALL4		CS16_HsGE191	LYZL1
ISL1		CS16_HsGE192	LYZL1
ECEL1		CS16_HsGE193	SVIL
KIRREL2		CS16_HsGE194	SVIL
TPBG		CS16_HsGE200	RET
TRIM71		CS16_HsGE201	RET
CYP1B1		CS16_HsGE211	C10orf35
ATOH1		CS16_HsGE212	C10orf35
DDC		CS16_HsGE213	COL13A1
SP5		CS16_HsGE214	COL13A1
NKX2-2		CS16_HsGE215	COL13A1
FAM19A4		CS16_HsGE216	COL13A1
TLX3		CS16_HsGE217	COL13A1
ZIC1		CS16_HsGE221	ZNF503
PAX7		CS16_HsGE222	C10orf11
COLEC12		CS16_HsGE223	C10orf11
WLS		CS16_HsGE224	C10orf11
PCOLCE		CS16_HsGE231	MYOF
EBF2		CS16_HsGE232	MYOF
GFRA1		CS16_HsGE233	ANKRD2
PCDH18		CS16_HsGE234	ANKRD2
WNT3A		CS16_HsGE240	AFAP1L2
CYTL1		CS16_HsGE241	AFAP1L2
IGF2BP1		CS16_HsGE244	GRK5
LHX9		CS16_HsGE245	GRK5
ONECUT2		CS16_HsGE248	HMX3
EFCC1		CS16_HsGE249	HMX3
STK26		CS16_HsGE251	LHPP
PRRX1		CS16_HsGE252	LHPP
OLFML3		CS16_HsGE253	CTBP2
SULF2		CS16_HsGE254	CTBP2
RBPMS2		CS16_HsGE256	MKI67
NPTX2		CS16_HsGE257	MKI67
CXCR4		CS16_HsGE258	MGMT
ZIC3		CS16_HsGE259	MGMT
FBLN2		CS16_HsGE260	MGMT
NHLH2		CS16_HsGE261	MGMT
MMP2		CS16_HsGE262	MGMT
NUAK2		CS16_HsGE263	MGMT
ALPL		CS16_HsGE264	MGMT
PLVAP		CS16_HsGE265	MGMT
SCUBE3		CS16_HsGE266	EBF3
ALCAM		CS16_HsGE267	EBF3
DSC2		CS16_HsGE268	EBF3
TPPP3		CS16_HsGE269	EBF3
NR2F6		CS16_HsGE270	EBF3
EYA2		CS16_HsGE271	EBF3
PAPPA		CS16_HsGE274	NKX6-2
NECAB2		CS16_HsGE276	IGF2
LRRN1		CS16_HsGE277	IGF2
BCAT1		CS16_HsGE278	IGF2
NKD1		CS16_HsGE279	IGF2
CXXC4		CS16_HsGE280	TH
LRP2		CS16_HsGE281	TH
DNMT3B		CS16_HsGE283	KCNQ1
FAM222A		CS16_HsGE284	KCNQ1
FN1		CS16_HsGE285	KCNQ1
KLHDC8B		CS16_HsGE286	CDKN1C
		CS16_HsGE287	CDKN1C
		CS16_HsGE288	CDKN1C
		CS16_HsGE291	WEE1
		CS16_HsGE292	WEE1
		CS16_HsGE296	LGR4
		CS16_HsGE301	CD82
		CS16_HsGE302	CD82
		CS16_HsGE305	PTPRJ
		CS16_HsGE306	PTPRJ
		CS16_HsGE307	PTPRJ
		CS16_HsGE308	PTPRJ
		CS16_HsGE309	OR4B1
		CS16_HsGE310	OR4B1
		CS16_HsGE313	SCGB1A1
		CS16_HsGE314	SCGB1A1
		CS16_HsGE315	AHNAK
		CS16_HsGE316	AHNAK
		CS16_HsGE321	TPCN2
		CS16_HsGE322	TPCN2
		CS16_HsGE323	TPCN2
		CS16_HsGE324	TPCN2
		CS16_HsGE325	CCND1
		CS16_HsGE326	CCND1
		CS16_HsGE327	CCND1
		CS16_HsGE328	CCND1
		CS16_HsGE329	FGF19
		CS16_HsGE330	FGF19
		CS16_HsGE331	FGF3
		CS16_HsGE332	FGF3
		CS16_HsGE334	CTTN
		CS16_HsGE335	CTTN
		CS16_HsGE338	P2RY2
		CS16_HsGE339	P2RY2
		CS16_HsGE343	WNT11
		CS16_HsGE344	WNT11
		CS16_HsGE345	WNT11
		CS16_HsGE346	WNT11
		CS16_HsGE347	LRRC32
		CS16_HsGE348	LRRC32
		CS16_HsGE349	TENM4
		CS16_HsGE350	TENM4
		CS16_HsGE358	GRIK4
		CS16_HsGE359	GRIK4
		CS16_HsGE367	C11orf44
		CS16_HsGE368	C11orf44
		CS16_HsGE369	C11orf44
		CS16_HsGE370	C11orf44
		CS16_HsGE371	C11orf44
		CS16_HsGE374	FBXL14
		CS16_HsGE375	FBXL14
		CS16_HsGE376	FBXL14
		CS16_HsGE377	FBXL14
		CS16_HsGE381	KCNA5
		CS16_HsGE382	KCNA5
		CS16_HsGE383	NTF3
		CS16_HsGE384	NTF3
		CS16_HsGE385	NTF3
		CS16_HsGE386	VWF
		CS16_HsGE387	VWF
		CS16_HsGE392	TMEM106C
		CS16_HsGE393	TMEM106C
		CS16_HsGE395	ANKRD33
		CS16_HsGE396	ANKRD33
		CS16_HsGE397	ANKRD33
		CS16_HsGE402	HMGA2
		CS16_HsGE408	RFX4
		CS16_HsGE409	RFX4
		CS16_HsGE419	TMEM132C
		CS16_HsGE420	TMEM132C
		CS16_HsGE421	TMEM132C
		CS16_HsGE422	TMEM132C
		CS16_HsGE423	TMEM132C
		CS16_HsGE424	FZD10
		CS16_HsGE430	SHISA2
		CS16_HsGE431	SHISA2
		CS16_HsGE440	CLYBL
		CS16_HsGE441	CLYBL
		CS16_HsGE442	CLYBL
		CS16_HsGE446	COL4A2
		CS16_HsGE447	COL4A2
		CS16_HsGE448	COL4A2
		CS16_HsGE455	NFKBIA
		CS16_HsGE456	NFKBIA
		CS16_HsGE457	FOXA1
		CS16_HsGE459	BMP4
		CS16_HsGE460	BMP4
		CS16_HsGE461	CDKN3
		CS16_HsGE462	CDKN3
		CS16_HsGE463	CDKN3
		CS16_HsGE465	OTX2
		CS16_HsGE466	OTX2
		CS16_HsGE469	TRMT5
		CS16_HsGE470	TRMT5
		CS16_HsGE477	ZFP36L1
		CS16_HsGE478	ZFP36L1
		CS16_HsGE479	ZFP36L1
		CS16_HsGE480	ZFP36L1
		CS16_HsGE481	ZFP36L1
		CS16_HsGE482	ACTN1
		CS16_HsGE483	ACTN1
		CS16_HsGE484	ACTN1
		CS16_HsGE487	LTBP2
		CS16_HsGE488	LTBP2
		CS16_HsGE493	RIN3
		CS16_HsGE494	RIN3
		CS16_HsGE495	PRIMA1
		CS16_HsGE496	PRIMA1
		CS16_HsGE497	ASB2
		CS16_HsGE498	ASB2
		CS16_HsGE501	ENSG00000269375
		CS16_HsGE502	ENSG00000269375
		CS16_HsGE503	ENSG00000269375
		CS16_HsGE504	ENSG00000269375
		CS16_HsGE505	DIO3
		CS16_HsGE506	DIO3
		CS16_HsGE507	DIO3
		CS16_HsGE508	CDC42BPB
		CS16_HsGE509	CDC42BPB
		CS16_HsGE511	TJP1
		CS16_HsGE512	TJP1
		CS16_HsGE513	TJP1
		CS16_HsGE514	TJP1
		CS16_HsGE519	ONECUT1
		CS16_HsGE520	ONECUT1
		CS16_HsGE522	PRTG
		CS16_HsGE523	PRTG
		CS16_HsGE524	PRTG
		CS16_HsGE525	CGNL1
		CS16_HsGE526	CGNL1
		CS16_HsGE529	FOXB1
		CS16_HsGE530	RORA
		CS16_HsGE531	RORA
		CS16_HsGE535	SMAD6
		CS16_HsGE536	SMAD6
		CS16_HsGE537	SMAD6
		CS16_HsGE538	SMAD6
		CS16_HsGE539	SMAD3
		CS16_HsGE540	SMAD3
		CS16_HsGE542	ITGA11
		CS16_HsGE543	ITGA11
		CS16_HsGE544	C15orf27
		CS16_HsGE545	C15orf27
		CS16_HsGE546	CRABP1
		CS16_HsGE552	ZNF710
		CS16_HsGE553	ZNF710
		CS16_HsGE556	RGMA
		CS16_HsGE557	RGMA
		CS16_HsGE559	NR2F2
		CS16_HsGE560	NR2F2
		CS16_HsGE561	NR2F2
		CS16_HsGE562	IGF1R
		CS16_HsGE563	IGF1R
		CS16_HsGE564	IGF1R
		CS16_HsGE565	IGF1R
		CS16_HsGE566	IGF1R
		CS16_HsGE567	IGF1R
		CS16_HsGE569	ALDH1A3
		CS16_HsGE570	ALDH1A3
		CS16_HsGE571	ALDH1A3
		CS16_HsGE573	PCSK6
		CS16_HsGE574	PCSK6
		CS16_HsGE575	PCSK6
		CS16_HsGE581	PPL
		CS16_HsGE582	PPL
		CS16_HsGE583	SOCS1
		CS16_HsGE584	SOCS1
		CS16_HsGE585	RMI2
		CS16_HsGE586	RMI2
		CS16_HsGE587	ENSG00000188897
		CS16_HsGE588	ENSG00000188897
		CS16_HsGE589	ENSG00000188897
		CS16_HsGE594	ZNF423
		CS16_HsGE595	ZNF423
		CS16_HsGE596	ADCY7
		CS16_HsGE597	ADCY7
		CS16_HsGE598	BRD7
		CS16_HsGE599	BRD7
		CS16_HsGE600	IRX3
		CS16_HsGE601	IRX3
		CS16_HsGE602	IRX3
		CS16_HsGE603	IRX3
		CS16_HsGE604	IRX3
		CS16_HsGE605	IRX3
		CS16_HsGE606	IRX3
		CS16_HsGE607	IRX3
		CS16_HsGE608	IRX3
		CS16_HsGE609	IRX3
		CS16_HsGE610	IRX5
		CS16_HsGE611	IRX5
		CS16_HsGE612	GNAO1
		CS16_HsGE613	GNAO1
		CS16_HsGE621	SMPD3
		CS16_HsGE622	SMPD3
		CS16_HsGE626	ZFHX3
		CS16_HsGE627	ZFHX3
		CS16_HsGE628	ZFHX3
		CS16_HsGE629	ZFHX3
		CS16_HsGE630	ZFHX3
		CS16_HsGE631	ZFHX3
		CS16_HsGE632	ZFHX3
		CS16_HsGE633	ZFHX3
		CS16_HsGE637	VAT1L
		CS16_HsGE638	VAT1L
		CS16_HsGE640	CMIP
		CS16_HsGE641	CMIP
		CS16_HsGE642	CMIP
		CS16_HsGE643	CMIP
		CS16_HsGE651	IRF8
		CS16_HsGE652	IRF8
		CS16_HsGE655	FBXO31
		CS16_HsGE656	FBXO31
		CS16_HsGE660	NXN
		CS16_HsGE661	NXN
		CS16_HsGE662	NXN
		CS16_HsGE666	NTN1
		CS16_HsGE667	NTN1
		CS16_HsGE668	NTN1
		CS16_HsGE669	NTN1
		CS16_HsGE677	KCNJ12
		CS16_HsGE678	KCNJ12
		CS16_HsGE679	KCNJ12
		CS16_HsGE695	DLX4
		CS16_HsGE696	DLX4
		CS16_HsGE697	COL1A1
		CS16_HsGE699	TBX2
		CS16_HsGE700	TBX2
		CS16_HsGE701	TBX2
		CS16_HsGE705	AXIN2
		CS16_HsGE706	AXIN2
		CS16_HsGE708	CDC42EP4
		CS16_HsGE709	CDC42EP4
		CS16_HsGE710	SDK2
		CS16_HsGE722	METRNL
		CS16_HsGE723	METRNL
		CS16_HsGE724	THOC1
		CS16_HsGE725	THOC1
		CS16_HsGE729	PTPRM
		CS16_HsGE730	PTPRM
		CS16_HsGE732	APCDD1
		CS16_HsGE733	APCDD1
		CS16_HsGE740	CABLES1
		CS16_HsGE741	CABLES1
		CS16_HsGE742	HRH4
		CS16_HsGE743	HRH4
		CS16_HsGE744	HRH4
		CS16_HsGE745	ZNF521
		CS16_HsGE746	ZNF521
		CS16_HsGE747	ZNF521
		CS16_HsGE748	KCTD1
		CS16_HsGE749	KCTD1
		CS16_HsGE750	KCTD1
		CS16_HsGE755	ZBTB7C
		CS16_HsGE756	ZBTB7C
		CS16_HsGE757	ZBTB7C
		CS16_HsGE758	ZBTB7C
		CS16_HsGE759	CTIF
		CS16_HsGE760	CTIF
		CS16_HsGE764	ALPK2
		CS16_HsGE765	ALPK2
		CS16_HsGE767	ZCCHC2
		CS16_HsGE768	ZCCHC2
		CS16_HsGE769	BCL2
		CS16_HsGE770	BCL2
		CS16_HsGE771	BCL2
		CS16_HsGE772	BCL2
		CS16_HsGE776	GALR1
		CS16_HsGE777	GALR1
		CS16_HsGE789	PLEKHF1
		CS16_HsGE790	PLEKHF1
		CS16_HsGE806	PXDN
		CS16_HsGE807	PXDN
		CS16_HsGE814	GREB1
		CS16_HsGE815	LPIN1
		CS16_HsGE816	LPIN1
		CS16_HsGE817	OSR1
		CS16_HsGE818	OSR1
		CS16_HsGE819	OSR1
		CS16_HsGE820	TTC32
		CS16_HsGE821	TTC32
		CS16_HsGE822	LAPTM4A
		CS16_HsGE823	LAPTM4A
		CS16_HsGE824	LAPTM4A
		CS16_HsGE825	SDC1
		CS16_HsGE826	SDC1
		CS16_HsGE827	RHOB
		CS16_HsGE828	RHOB
		CS16_HsGE829	RHOB
		CS16_HsGE831	POMC
		CS16_HsGE832	POMC
		CS16_HsGE838	HAAO
		CS16_HsGE839	HAAO
		CS16_HsGE840	HAAO
		CS16_HsGE841	HAAO
		CS16_HsGE842	ZFP36L2
		CS16_HsGE843	ZFP36L2
		CS16_HsGE845	SIX2
		CS16_HsGE846	SIX2
		CS16_HsGE847	SIX2
		CS16_HsGE848	SIX2
		CS16_HsGE849	EPAS1
		CS16_HsGE850	EPAS1
		CS16_HsGE851	KCNK12
		CS16_HsGE852	KCNK12
		CS16_HsGE855	SPRED2
		CS16_HsGE856	SPRED2
		CS16_HsGE857	SPRED2
		CS16_HsGE858	MEIS1
		CS16_HsGE859	MEIS1
		CS16_HsGE861	DYSF
		CS16_HsGE862	DYSF
		CS16_HsGE872	MAL
		CS16_HsGE873	MAL
		CS16_HsGE885	EN1
		CS16_HsGE886	EN1
		CS16_HsGE895	SP3
		CS16_HsGE896	SP3
		CS16_HsGE897	SP3
		CS16_HsGE903	TNS1
		CS16_HsGE904	TNS1
		CS16_HsGE905	TNS1
		CS16_HsGE907	PAX3
		CS16_HsGE908	PAX3
		CS16_HsGE910	CAB39
		CS16_HsGE911	CAB39
		CS16_HsGE915	ARL4C
		CS16_HsGE916	ARL4C
		CS16_HsGE918	AGAP1
		CS16_HsGE919	AGAP1
		CS16_HsGE920	GBX2
		CS16_HsGE921	GBX2
		CS16_HsGE922	GBX2
		CS16_HsGE923	GBX2
		CS16_HsGE924	ACKR3
		CS16_HsGE925	ASB1
		CS16_HsGE926	ASB1
		CS16_HsGE927	ASB1
		CS16_HsGE928	TWIST2
		CS16_HsGE929	TWIST2
		CS16_HsGE930	TWIST2
		CS16_HsGE931	TWIST2
		CS16_HsGE932	TWIST2
		CS16_HsGE936	SMOX
		CS16_HsGE937	SMOX
		CS16_HsGE940	SLX4IP
		CS16_HsGE941	SLX4IP
		CS16_HsGE942	JAG1
		CS16_HsGE943	JAG1
		CS16_HsGE944	SLC24A3
		CS16_HsGE945	SLC24A3
		CS16_HsGE948	FOXA2
		CS16_HsGE949	FOXA2
		CS16_HsGE950	FOXA2
		CS16_HsGE955	EMILIN3
		CS16_HsGE956	EMILIN3
		CS16_HsGE967	BMP7
		CS16_HsGE968	BMP7
		CS16_HsGE969	BMP7
		CS16_HsGE970	RBM38
		CS16_HsGE971	RBM38
		CS16_HsGE977	EDN3
		CS16_HsGE978	EDN3
		CS16_HsGE979	EDN3
		CS16_HsGE981	GATA5
		CS16_HsGE982	GATA5
		CS16_HsGE988	RUNX1
		CS16_HsGE989	RUNX1
		CS16_HsGE990	RUNX1
		CS16_HsGE997	RIPK4
		CS16_HsGE998	RIPK4
		CS16_HsGE1005	COL18A1
		CS16_HsGE1010	TBX1
		CS16_HsGE1011	TBX1
		CS16_HsGE1018	MYH9
		CS16_HsGE1019	MYH9
		CS16_HsGE1020	TXN2
		CS16_HsGE1021	TXN2
		CS16_HsGE1022	CBX7
		CS16_HsGE1023	CBX7
		CS16_HsGE1024	PDGFB
		CS16_HsGE1025	PDGFB
		CS16_HsGE1026	RPL3
		CS16_HsGE1027	RPL3
		CS16_HsGE1028	RPL3
		CS16_HsGE1029	CACNA1I
		CS16_HsGE1030	CACNA1I
		CS16_HsGE1031	CACNA1I
		CS16_HsGE1032	CACNA1I
		CS16_HsGE1036	FAM19A5
		CS16_HsGE1037	FAM19A5
		CS16_HsGE1038	FAM19A5
		CS16_HsGE1039	FAM19A5
		CS16_HsGE1040	FAM19A5
		CS16_HsGE1043	LMCD1
		CS16_HsGE1044	LMCD1
		CS16_HsGE1045	LMCD1
		CS16_HsGE1050	SLC6A6
		CS16_HsGE1051	SLC6A6
		CS16_HsGE1052	SLC6A6
		CS16_HsGE1053	SLC6A6
		CS16_HsGE1057	CTDSPL
		CS16_HsGE1058	CTDSPL
		CS16_HsGE1069	WNT5A
		CS16_HsGE1080	GATA2
		CS16_HsGE1083	AMOTL2
		CS16_HsGE1084	AMOTL2
		CS16_HsGE1091	ZIC4
		CS16_HsGE1095	SCHIP1
		CS16_HsGE1096	SCHIP1
		CS16_HsGE1098	MECOM
		CS16_HsGE1099	MECOM
		CS16_HsGE1100	ACTRT3
		CS16_HsGE1101	ACTRT3
		CS16_HsGE1102	ACTRT3
		CS16_HsGE1106	EPHB3
		CS16_HsGE1107	EPHB3
		CS16_HsGE1108	EPHB3
		CS16_HsGE1109	EPHB3
		CS16_HsGE1110	EPHB3
		CS16_HsGE1111	EPHB3
		CS16_HsGE1112	LEPREL1
		CS16_HsGE1113	LEPREL1
		CS16_HsGE1115	HES1
		CS16_HsGE1116	HES1
		CS16_HsGE1120	XXYLT1
		CS16_HsGE1121	XXYLT1
		CS16_HsGE1122	XXYLT1
		CS16_HsGE1127	FAM53A
		CS16_HsGE1128	FAM53A
		CS16_HsGE1131	STX18
		CS16_HsGE1132	STX18
		CS16_HsGE1133	STX18
		CS16_HsGE1134	STX18
		CS16_HsGE1135	STX18
		CS16_HsGE1136	MSX1
		CS16_HsGE1140	CPZ
		CS16_HsGE1141	CPZ
		CS16_HsGE1143	SLIT2
		CS16_HsGE1151	NKX6-1
		CS16_HsGE1154	LEF1
		CS16_HsGE1158	MAB21L2
		CS16_HsGE1164	TENM3
		CS16_HsGE1165	TENM3
		CS16_HsGE1167	CDKN2AIP
		CS16_HsGE1168	CDKN2AIP
		CS16_HsGE1169	TRAPPC11
		CS16_HsGE1170	TRAPPC11
		CS16_HsGE1171	TRAPPC11
		CS16_HsGE1173	ENPP6
		CS16_HsGE1174	ENPP6
		CS16_HsGE1175	ENPP6
		CS16_HsGE1176	ENPP6
		CS16_HsGE1180	FAT1
		CS16_HsGE1181	FAT1
		CS16_HsGE1182	FAT1
		CS16_HsGE1190	IRX4
		CS16_HsGE1191	IRX4
		CS16_HsGE1192	IRX4
		CS16_HsGE1193	IRX4
		CS16_HsGE1194	IRX2
		CS16_HsGE1195	IRX2
		CS16_HsGE1196	IRX2
		CS16_HsGE1197	IRX2
		CS16_HsGE1198	IRX2
		CS16_HsGE1199	C5orf38
		CS16_HsGE1200	C5orf38
		CS16_HsGE1201	C5orf38
		CS16_HsGE1202	C5orf38
		CS16_HsGE1203	C5orf38
		CS16_HsGE1204	IRX1
		CS16_HsGE1205	IRX1
		CS16_HsGE1206	IRX1
		CS16_HsGE1207	IRX1
		CS16_HsGE1220	TMEM174
		CS16_HsGE1221	TMEM174
		CS16_HsGE1222	FOXD1
		CS16_HsGE1223	FOXD1
		CS16_HsGE1224	FOXD1
		CS16_HsGE1230	EFNA5
		CS16_HsGE1238	H2AFY
		CS16_HsGE1239	H2AFY
		CS16_HsGE1240	H2AFY
		CS16_HsGE1244	SPRY4
		CS16_HsGE1245	SPRY4
		CS16_HsGE1246	SPRY4
		CS16_HsGE1248	ADRB2
		CS16_HsGE1249	ADRB2
		CS16_HsGE1251	SYNPO
		CS16_HsGE1252	SYNPO
		CS16_HsGE1254	FAT2
		CS16_HsGE1255	FAT2
		CS16_HsGE1256	FAT2
		CS16_HsGE1258	HAND1
		CS16_HsGE1259	HAND1
		CS16_HsGE1261	EBF1
		CS16_HsGE1262	EBF1
		CS16_HsGE1263	EBF1
		CS16_HsGE1264	EBF1
		CS16_HsGE1266	ADRA1B
		CS16_HsGE1267	ADRA1B
		CS16_HsGE1268	WWC1
		CS16_HsGE1269	WWC1
		CS16_HsGE1270	WWC1
		CS16_HsGE1271	PANK3
		CS16_HsGE1272	PANK3
		CS16_HsGE1273	SLIT3
		CS16_HsGE1274	SLIT3
		CS16_HsGE1275	SLIT3
		CS16_HsGE1276	FOXI1
		CS16_HsGE1277	FOXI1
		CS16_HsGE1278	FOXI1
		CS16_HsGE1279	FOXI1
		CS16_HsGE1283	FGF18
		CS16_HsGE1284	FGF18
		CS16_HsGE1285	FGF18
		CS16_HsGE1286	FGF18
		CS16_HsGE1287	FGF18
		CS16_HsGE1288	FGF18
		CS16_HsGE1289	STK10
		CS16_HsGE1290	STK10
		CS16_HsGE1293	PHYKPL
		CS16_HsGE1294	PHYKPL
		CS16_HsGE1295	PHYKPL
		CS16_HsGE1298	MGAT1
		CS16_HsGE1299	MGAT1
		CS16_HsGE1300	DUSP22
		CS16_HsGE1301	DUSP22
		CS16_HsGE1302	IRF4
		CS16_HsGE1303	IRF4
		CS16_HsGE1304	IRF4
		CS16_HsGE1305	FOXC1
		CS16_HsGE1306	FOXC1
		CS16_HsGE1307	FOXC1
		CS16_HsGE1308	FOXC1
		CS16_HsGE1309	FOXC1
		CS16_HsGE1310	FOXC1
		CS16_HsGE1311	FOXC1
		CS16_HsGE1312	FOXC1
		CS16_HsGE1313	FOXC1
		CS16_HsGE1314	FOXC1
		CS16_HsGE1317	RREB1
		CS16_HsGE1318	RREB1
		CS16_HsGE1319	RREB1
		CS16_HsGE1320	RREB1
		CS16_HsGE1325	TFAP2A
		CS16_HsGE1326	TFAP2A
		CS16_HsGE1343	VEGFA
		CS16_HsGE1344	VEGFA
		CS16_HsGE1345	VEGFA
		CS16_HsGE1346	VEGFA
		CS16_HsGE1347	TMEM63B
		CS16_HsGE1348	TMEM63B
		CS16_HsGE1351	TRAM2
		CS16_HsGE1352	TRAM2
		CS16_HsGE1353	GCLC
		CS16_HsGE1354	GCLC
		CS16_HsGE1360	LIN28B
		CS16_HsGE1366	OLIG3
		CS16_HsGE1367	OLIG3
		CS16_HsGE1372	AKAP12
		CS16_HsGE1373	AKAP12
		CS16_HsGE1374	AKAP12
		CS16_HsGE1375	ARID1B
		CS16_HsGE1376	ARID1B
		CS16_HsGE1389	UNCX
		CS16_HsGE1390	UNCX
		CS16_HsGE1392	LFNG
		CS16_HsGE1393	LFNG
		CS16_HsGE1394	GNA12
		CS16_HsGE1395	GNA12
		CS16_HsGE1397	ARL4A
		CS16_HsGE1398	TWIST1
		CS16_HsGE1407	GLI3
		CS16_HsGE1408	GLI3
		CS16_HsGE1412	EGFR
		CS16_HsGE1413	EGFR
		CS16_HsGE1416	WBSCR28
		CS16_HsGE1417	WBSCR28
		CS16_HsGE1418	WBSCR28
		CS16_HsGE1419	WBSCR28
		CS16_HsGE1427	LRRC4
		CS16_HsGE1428	LRRC4
		CS16_HsGE1430	PODXL
		CS16_HsGE1431	PODXL
		CS16_HsGE1432	PODXL
		CS16_HsGE1439	EN2
		CS16_HsGE1440	EN2
		CS16_HsGE1441	EN2
		CS16_HsGE1442	SHH
		CS16_HsGE1443	SHH
		CS16_HsGE1450	GATA4
		CS16_HsGE1451	GATA4
		CS16_HsGE1466	PLEKHA2
		CS16_HsGE1467	PLEKHA2
		CS16_HsGE1482	MATN2
		CS16_HsGE1483	MATN2
		CS16_HsGE1491	EXT1
		CS16_HsGE1492	EXT1
		CS16_HsGE1493	ENPP2
		CS16_HsGE1495	TRIB1
		CS16_HsGE1496	TRIB1
		CS16_HsGE1497	TRIB1
		CS16_HsGE1502	PSIP1
		CS16_HsGE1503	PSIP1
		CS16_HsGE1504	PSIP1
		CS16_HsGE1505	BNC2
		CS16_HsGE1506	BNC2
		CS16_HsGE1507	BNC2
		CS16_HsGE1508	BNC2
		CS16_HsGE1513	PAX5
		CS16_HsGE1514	PAX5
		CS16_HsGE1515	PAX5
		CS16_HsGE1516	PAX5
		CS16_HsGE1524	PTCH1
		CS16_HsGE1525	ERCC6L2
		CS16_HsGE1526	ERCC6L2
		CS16_HsGE1527	ERCC6L2
		CS16_HsGE1528	ERCC6L2
		CS16_HsGE1529	HSD17B3
		CS16_HsGE1530	HSD17B3
		CS16_HsGE1531	HSD17B3
		CS16_HsGE1539	ZNF618
		CS16_HsGE1541	KIF12
		CS16_HsGE1542	KIF12
		CS16_HsGE1544	PAPPA-AS1
		CS16_HsGE1545	PAPPA-AS1
		CS16_HsGE1546	PAPPA-AS1
		CS16_HsGE1547	PAPPA-AS1
		CS16_HsGE1548	PAPPA-AS1
		CS16_HsGE1549	PAPPA-AS1
		CS16_HsGE1553	PBX3
		CS16_HsGE1554	PBX3
		CS16_HsGE1555	LMX1B
		CS16_HsGE1556	LMX1B
		CS16_HsGE1557	LMX1B
		CS16_HsGE1558	LMX1B
		CS16_HsGE1559	LMX1B
		CS16_HsGE1562	PRRX2
		CS16_HsGE1565	LAMC3
		CS16_HsGE1566	LAMC3
		CS16_HsGE1568	TTF1
		CS16_HsGE1569	TTF1
		CS16_HsGE1570	TTF1
		CS16_HsGE1571	BARHL1
		CS16_HsGE1579	BCOR
		CS16_HsGE1580	BCOR
		CS16_HsGE1584	STARD8
		CS16_HsGE1585	STARD8
		CS16_HsGE1586	PJA1
		CS16_HsGE1587	PJA1
		CS16_HsGE1590	PIN4
		CS16_HsGE1591	PIN4
		CS16_HsGE09	ERRFI1
		CS16_HsGE10	SLC45A1
		CS16_HsGE11	CA6
		CS16_HsGE12	GPR157
		CS16_HsGE15	CLSTN1
		CS16_HsGE18	AGTRAP
		CS16_HsGE27	CLCNKB
		CS16_HsGE30	PADI1
		CS16_HsGE31	ARHGEF10L
		CS16_HsGE32	IFFO2
		CS16_HsGE33	CAMK2N1
		CS16_HsGE34	HSPG2
		CS16_HsGE42	KDM1A
		CS16_HsGE47	LDLRAP1
		CS16_HsGE48	MED18
		CS16_HsGE49	LAPTM5
		CS16_HsGE50	TINAGL1
		CS16_HsGE53	TRIM62
		CS16_HsGE54	GJA4
		CS16_HsGE55	SMIM12
		CS16_HsGE56	PSMB2
		CS16_HsGE57	COL8A2
		CS16_HsGE58	EVA1B
		CS16_HsGE60	MACF1
		CS16_HsGE61	EDN2
		CS16_HsGE62	LEPRE1
		CS16_HsGE66	KLF17
		CS16_HsGE67	RNF220
		CS16_HsGE68	TMEM53
		CS16_HsGE71	TAL1
		CS16_HsGE72	FOXE3
		CS16_HsGE87	DMRTA2
		CS16_HsGE88	SSBP3
		CS16_HsGE94	KANK4
		CS16_HsGE95	ROR1
		CS16_HsGE96	UBE2U
		CS16_HsGE97	CYR61
		CS16_HsGE98	ZNF326
		CS16_HsGE113	SLC44A3
		CS16_HsGE114	AHCYL1
		CS16_HsGE115	ALX3
		CS16_HsGE116	UBL4B
		CS16_HsGE117	KCNC4
		CS16_HsGE118	ADORA3
		CS16_HsGE119	VANGL1
		CS16_HsGE120	WARS2
		CS16_HsGE124	BCL9
		CS16_HsGE125	ADAMTSL4
		CS16_HsGE126	KRTCAP2
		CS16_HsGE127	ETV3L
		CS16_HsGE128	DDR2
		CS16_HsGE129	CD247
		CS16_HsGE130	PIGC
		CS16_HsGE131	SUCO
		CS16_HsGE132	ZNF648
		CS16_HsGE133	NMNAT2
		CS16_HsGE136	NAV1
		CS16_HsGE139	LMOD1
		CS16_HsGE140	ELF3
		CS16_HsGE143	MFSD4
		CS16_HsGE144	NEK2
		CS16_HsGE148	ATF3
		CS16_HsGE149	BATF3
		CS16_HsGE150	PROX1
		CS16_HsGE155	LEFTY1
		CS16_HsGE158	ITPKB
		CS16_HsGE159	ADCK3
		CS16_HsGE162	TOMM20
		CS16_HsGE163	NID1
		CS16_HsGE164	ADSS
		CS16_HsGE165	EFCAB2
		CS16_HsGE168	DIP2C
		CS16_HsGE179	ASB13
		CS16_HsGE180	ITIH5
		CS16_HsGE182	UPF2
		CS16_HsGE183	CAMK1D
		CS16_HsGE184	CCDC3
		CS16_HsGE185	PRPF18
		CS16_HsGE186	FRMD4A
		CS16_HsGE187	TMEM236
		CS16_HsGE188	PIP4K2A
		CS16_HsGE195	LYZL2
		CS16_HsGE196	ZNF438
		CS16_HsGE197	ZEB1
		CS16_HsGE198	NRP1
		CS16_HsGE199	PARD3
		CS16_HsGE202	TMEM72
		CS16_HsGE203	GPRIN2
		CS16_HsGE204	ANXA8L1
		CS16_HsGE205	GDF10
		CS16_HsGE206	WDFY4
		CS16_HsGE207	VSTM4
		CS16_HsGE208	C10orf128
		CS16_HsGE209	OGDHL
		CS16_HsGE210	SRGN
		CS16_HsGE218	C10orf105
		CS16_HsGE219	PLAU
		CS16_HsGE220	VCL
		CS16_HsGE225	KCNMA1
		CS16_HsGE226	ZCCHC24
		CS16_HsGE227	PLAC9
		CS16_HsGE228	OPN4
		CS16_HsGE229	KLLN
		CS16_HsGE230	LIPA
		CS16_HsGE235	AVPI1
		CS16_HsGE236	HIF1AN
		CS16_HsGE237	XPNPEP1
		CS16_HsGE238	TCF7L2
		CS16_HsGE239	HABP2
		CS16_HsGE242	EMX2
		CS16_HsGE243	RAB11FIP2
		CS16_HsGE246	FGFR2
		CS16_HsGE247	PLEKHA1
		CS16_HsGE250	GPR26
		CS16_HsGE255	CLRN3
		CS16_HsGE272	GLRX3
		CS16_HsGE273	PPP2R2D
		CS16_HsGE275	MRPL23
		CS16_HsGE282	ASCL2
		CS16_HsGE289	DCHS1
		CS16_HsGE290	CYB5R2
		CS16_HsGE293	FAR1
		CS16_HsGE294	INSC
		CS16_HsGE295	C11orf58
		CS16_HsGE297	LMO2
		CS16_HsGE298	EHF
		CS16_HsGE299	PAMR1
		CS16_HsGE300	ALX4
		CS16_HsGE303	MAPK8IP1
		CS16_HsGE304	CREB3L1
		CS16_HsGE311	TNKS1BP1
		CS16_HsGE312	CD5
		CS16_HsGE317	PYGM
		CS16_HsGE318	EHD1
		CS16_HsGE319	RHOD
		CS16_HsGE320	CLCF1
		CS16_HsGE333	ANO1
		CS16_HsGE336	ARAP1
		CS16_HsGE337	FCHSD2
		CS16_HsGE340	P2RY6
		CS16_HsGE341	RELT
		CS16_HsGE342	SLCO2B1
		CS16_HsGE351	RAB30
		CS16_HsGE352	MMP20
		CS16_HsGE353	ZBTB16
		CS16_HsGE354	NNMT
		CS16_HsGE355	TMPRSS4
		CS16_HsGE356	CXCR5
		CS16_HsGE357	POU2F3
		CS16_HsGE360	TBCEL
		CS16_HsGE361	FEZ1
		CS16_HsGE362	ETS1
		CS16_HsGE363	FLI1
		CS16_HsGE364	NFRKB
		CS16_HsGE365	ST14
		CS16_HsGE366	ADAMTS8
		CS16_HsGE372	B4GALNT3
		CS16_HsGE373	NINJ2
		CS16_HsGE378	FKBP4
		CS16_HsGE379	CCND2
		CS16_HsGE380	FGF6
		CS16_HsGE388	CD9
		CS16_HsGE389	SCNN1A
		CS16_HsGE390	DENND5B
		CS16_HsGE391	RAPGEF3
		CS16_HsGE394	OR10AD1
		CS16_HsGE398	C12orf44
		CS16_HsGE399	KRT80
		CS16_HsGE400	TENC1
		CS16_HsGE401	OR10P1
		CS16_HsGE403	FRS2
		CS16_HsGE404	TSPAN8
		CS16_HsGE405	ALX1
		CS16_HsGE406	NEDD1
		CS16_HsGE407	CHST11
		CS16_HsGE410	BTBD11
		CS16_HsGE411	TMEM119
		CS16_HsGE412	TBX3
		CS16_HsGE413	MED13L
		CS16_HsGE414	TESC
		CS16_HsGE415	NOS1
		CS16_HsGE416	SUDS3
		CS16_HsGE417	KDM2B
		CS16_HsGE418	SNRNP35
		CS16_HsGE425	MUC8
		CS16_HsGE426	CRYL1
		CS16_HsGE427	TNFRSF19
		CS16_HsGE428	MIPEP
		CS16_HsGE429	ATP12A
		CS16_HsGE432	KATNAL1
		CS16_HsGE433	KL
		CS16_HsGE434	SMAD9
		CS16_HsGE435	FOXO1
		CS16_HsGE436	RCBTB2
		CS16_HsGE437	DLEU1
		CS16_HsGE438	DACH1
		CS16_HsGE439	TM9SF2
		CS16_HsGE443	ZIC5
		CS16_HsGE444	METTL21C
		CS16_HsGE445	COL4A1
		CS16_HsGE449	ARHGEF7
		CS16_HsGE450	TUBGCP3
		CS16_HsGE451	CEBPE
		CS16_HsGE452	ARHGAP5
		CS16_HsGE453	AKAP6
		CS16_HsGE454	PSMA6
		CS16_HsGE458	DDHD1
		CS16_HsGE464	TBPL2
		CS16_HsGE467	PPM1A
		CS16_HsGE468	SIX1
		CS16_HsGE471	TMEM30B
		CS16_HsGE472	PPP1R36
		CS16_HsGE473	PLEKHG3
		CS16_HsGE474	MAX
		CS16_HsGE475	PLEK2
		CS16_HsGE476	PLEKHH1
		CS16_HsGE485	KIAA0247
		CS16_HsGE486	PSEN1
		CS16_HsGE489	DLST
		CS16_HsGE490	PGF
		CS16_HsGE491	EIF2B2
		CS16_HsGE492	FBLN5
		CS16_HsGE499	IFI27L2
		CS16_HsGE500	GSC
		CS16_HsGE510	NDN
		CS16_HsGE515	EHD4
		CS16_HsGE516	C15orf48
		CS16_HsGE517	AP4E1
		CS16_HsGE518	TMOD3
		CS16_HsGE521	PYGO1
		CS16_HsGE527	GCOM1
		CS16_HsGE528	ALDH1A2
		CS16_HsGE532	TPM1
		CS16_HsGE533	HERC1
		CS16_HsGE534	KBTBD13
		CS16_HsGE541	PIAS1
		CS16_HsGE547	FAH
		CS16_HsGE548	MESDC2
		CS16_HsGE549	BNC1
		CS16_HsGE550	ISG20
		CS16_HsGE551	ANPEP
		CS16_HsGE554	ST8SIA2
		CS16_HsGE555	FAM174B
		CS16_HsGE558	MCTP2
		CS16_HsGE568	PGPEP1L
		CS16_HsGE572	CHSY1
		CS16_HsGE576	GNG13
		CS16_HsGE577	CREBBP
		CS16_HsGE578	ADCY9
		CS16_HsGE579	TFAP4
		CS16_HsGE580	GLIS2
		CS16_HsGE590	MKL2
		CS16_HsGE591	PARN
		CS16_HsGE592	XYLT1
		CS16_HsGE593	MYLK3
		CS16_HsGE614	NLRC5
		CS16_HsGE615	CCL17
		CS16_HsGE616	CNGB1
		CS16_HsGE617	MMP15
		CS16_HsGE618	CDH5
		CS16_HsGE619	BEAN1
		CS16_HsGE620	CDH16
		CS16_HsGE623	CDH3
		CS16_HsGE624	FUK
		CS16_HsGE625	VAC14
		CS16_HsGE634	MLKL
		CS16_HsGE635	FA2H
		CS16_HsGE636	CFDP1
		CS16_HsGE639	MAF
		CS16_HsGE644	PLCG2
		CS16_HsGE645	HSD17B2
		CS16_HsGE646	HSBP1
		CS16_HsGE647	ATP2C2
		CS16_HsGE648	COTL1
		CS16_HsGE649	ZDHHC7
		CS16_HsGE650	KIAA0513
		CS16_HsGE653	FOXF1
		CS16_HsGE654	FOXL1
		CS16_HsGE657	BANP
		CS16_HsGE658	ZNF469
		CS16_HsGE659	ZFPM1
		CS16_HsGE663	OR1D5
		CS16_HsGE664	ITGAE
		CS16_HsGE665	GGT6
		CS16_HsGE670	ELAC2
		CS16_HsGE671	TVP23C
		CS16_HsGE672	MPRIP
		CS16_HsGE673	PLD6
		CS16_HsGE674	B9D1
		CS16_HsGE675	SLC47A1
		CS16_HsGE676	LGALS9B
		CS16_HsGE680	CRYBA1
		CS16_HsGE681	RAB11FIP4
		CS16_HsGE682	CCL2
		CS16_HsGE683	HAP1
		CS16_HsGE684	JUP
		CS16_HsGE685	PTRF
		CS16_HsGE686	NAGLU
		CS16_HsGE687	PYY
		CS16_HsGE688	FZD2
		CS16_HsGE689	CRHR1
		CS16_HsGE690	WNT3
		CS16_HsGE691	WNT9B
		CS16_HsGE692	PHB
		CS16_HsGE693	KAT7
		CS16_HsGE694	TAC4
		CS16_HsGE698	TOB1
		CS16_HsGE702	SCN4A
		CS16_HsGE703	TEX2
		CS16_HsGE704	RGS9
		CS16_HsGE707	CACNG5
		CS16_HsGE711	LLGL2
		CS16_HsGE712	RNF157
		CS16_HsGE713	MXRA7
		CS16_HsGE714	2015-09-09
		CS16_HsGE715	SOCS3
		CS16_HsGE716	CBX4
		CS16_HsGE717	TBC1D16
		CS16_HsGE718	TMEM105
		CS16_HsGE719	CSNK1D
		CS16_HsGE720	TEX19
		CS16_HsGE721	B3GNTL1
		CS16_HsGE726	ADCYAP1
		CS16_HsGE727	TMEM200C
		CS16_HsGE728	ARHGAP28
		CS16_HsGE731	SOGA2
		CS16_HsGE734	CHMP1B
		CS16_HsGE735	CIDEA
		CS16_HsGE736	TUBB6
		CS16_HsGE737	MIB1
		CS16_HsGE738	GATA6
		CS16_HsGE739	CTAGE1
		CS16_HsGE751	AQP4
		CS16_HsGE752	TTR
		CS16_HsGE753	SLC14A2
		CS16_HsGE754	SMAD2
		CS16_HsGE761	SMAD4
		CS16_HsGE762	FECH
		CS16_HsGE763	NEDD4L
		CS16_HsGE766	CDH20
		CS16_HsGE773	SMIM21
		CS16_HsGE774	ZNF516
		CS16_HsGE775	MBP
		CS16_HsGE778	SALL3
		CS16_HsGE779	NFATC1
		CS16_HsGE780	PARD6G
		CS16_HsGE781	MISP
		CS16_HsGE782	MLLT1
		CS16_HsGE783	VAV1
		CS16_HsGE784	ACTL9
		CS16_HsGE785	RFX1
		CS16_HsGE786	NDUFB7
		CS16_HsGE787	GDF15
		CS16_HsGE788	CRTC1
		CS16_HsGE791	URI1
		CS16_HsGE792	ZNF536
		CS16_HsGE793	CEBPA
		CS16_HsGE794	KCTD15
		CS16_HsGE795	LSM14A
		CS16_HsGE796	ACTN4
		CS16_HsGE797	NCCRP1
		CS16_HsGE798	PLAUR
		CS16_HsGE799	SAE1
		CS16_HsGE800	GLTSCR1
		CS16_HsGE801	CCDC155
		CS16_HsGE802	KLK15
		CS16_HsGE803	SBK2
		CS16_HsGE804	ENSG00000231274
		CS16_HsGE805	TPO
		CS16_HsGE808	MBOAT2
		CS16_HsGE809	GRHL1
		CS16_HsGE810	KLF11
		CS16_HsGE811	RRM2
		CS16_HsGE812	HPCAL1
		CS16_HsGE813	ODC1
		CS16_HsGE830	ADCY3
		CS16_HsGE833	SLC35F6
		CS16_HsGE834	FOSL2
		CS16_HsGE835	WDR43
		CS16_HsGE836	PKDCC
		CS16_HsGE837	COX7A2L
		CS16_HsGE844	PPM1B
		CS16_HsGE853	SPTBN1
		CS16_HsGE854	TMEM17
		CS16_HsGE860	ANTXR1
		CS16_HsGE863	CYP26B1
		CS16_HsGE864	CTNNA2
		CS16_HsGE865	KCMF1
		CS16_HsGE866	TGOLN2
		CS16_HsGE867	ATOH8
		CS16_HsGE868	ST3GAL5
		CS16_HsGE869	CD8A
		CS16_HsGE870	SMYD1
		CS16_HsGE871	TEX37
		CS16_HsGE874	FAHD2A
		CS16_HsGE875	ARID5A
		CS16_HsGE876	CNGA3
		CS16_HsGE877	RNF149
		CS16_HsGE878	EDAR
		CS16_HsGE879	ACOXL
		CS16_HsGE880	BCL2L11
		CS16_HsGE881	ANAPC1
		CS16_HsGE882	PSD4
		CS16_HsGE883	DDX18
		CS16_HsGE884	INSIG2
		CS16_HsGE887	GYPC
		CS16_HsGE888	TANC1
		CS16_HsGE889	WDSUB1
		CS16_HsGE890	RBMS1
		CS16_HsGE891	TANK
		CS16_HsGE892	NOSTRIN
		CS16_HsGE893	ITGA6
		CS16_HsGE894	RAPGEF4
		CS16_HsGE898	WIPF1
		CS16_HsGE899	TTC30A
		CS16_HsGE900	FZD5
		CS16_HsGE901	MREG
		CS16_HsGE902	IGFBP5
		CS16_HsGE906	SLC4A3
		CS16_HsGE909	IRS1
		CS16_HsGE912	GPR55
		CS16_HsGE913	PRSS56
		CS16_HsGE914	ATG16L1
		CS16_HsGE917	SH3BP4
		CS16_HsGE933	HDAC4
		CS16_HsGE934	ANGPT4
		CS16_HsGE935	RNF24
		CS16_HsGE938	PRND
		CS16_HsGE939	PRNT
		CS16_HsGE946	RIN2
		CS16_HsGE947	XRN2
		CS16_HsGE951	SSTR4
		CS16_HsGE952	CD93
		CS16_HsGE953	BLCAP
		CS16_HsGE954	TOP1
		CS16_HsGE957	JPH2
		CS16_HsGE958	WISP2
		CS16_HsGE959	SLC35C2
		CS16_HsGE960	SLC2A10
		CS16_HsGE961	SNAI1
		CS16_HsGE962	UBE2V1
		CS16_HsGE963	ADNP
		CS16_HsGE964	TSHZ2
		CS16_HsGE965	ZNF217
		CS16_HsGE966	DOK5
		CS16_HsGE972	PCK1
		CS16_HsGE973	ZBP1
		CS16_HsGE974	PMEPA1
		CS16_HsGE975	APCDD1L
		CS16_HsGE976	GNAS
		CS16_HsGE980	CABLES2
		CS16_HsGE983	SLCO4A1
		CS16_HsGE984	BIRC7
		CS16_HsGE985	TIAM1
		CS16_HsGE986	OLIG1
		CS16_HsGE987	CLIC6
		CS16_HsGE991	SIM2
		CS16_HsGE992	DSCR3
		CS16_HsGE993	ERG
		CS16_HsGE994	ETS2
		CS16_HsGE995	PSMG1
		CS16_HsGE996	IGSF5
		CS16_HsGE999	ABCG1
		CS16_HsGE1000	SIK1
		CS16_HsGE1001	HSF2BP
		CS16_HsGE1002	AGPAT3
		CS16_HsGE1003	LRRC3DN
		CS16_HsGE1004	TSPEAR
		CS16_HsGE1006	COL6A2
		CS16_HsGE1007	PRMT2
		CS16_HsGE1008	2015-09-05
		CS16_HsGE1009	GP1BB
		CS16_HsGE1012	BCR
		CS16_HsGE1013	ZNRF3
		CS16_HsGE1014	SEC14L2
		CS16_HsGE1015	FBXO7
		CS16_HsGE1016	SYN3
		CS16_HsGE1017	LARGE
		CS16_HsGE1033	ARFGAP3
		CS16_HsGE1034	TTLL12
		CS16_HsGE1035	WNT7B
		CS16_HsGE1041	BRD1
		CS16_HsGE1042	BHLHE40
		CS16_HsGE1046	LHFPL4
		CS16_HsGE1047	IQSEC1
		CS16_HsGE1048	NUP210
		CS16_HsGE1049	XPC
		CS16_HsGE1054	UBE2E1
		CS16_HsGE1055	RARB
		CS16_HsGE1056	ITGA9
		CS16_HsGE1059	CTNNB1
		CS16_HsGE1060	CDC25A
		CS16_HsGE1061	DAG1
		CS16_HsGE1062	APEH
		CS16_HsGE1063	CACNA2D2
		CS16_HsGE1064	C3orf18
		CS16_HsGE1065	CISH
		CS16_HsGE1066	ALAS1
		CS16_HsGE1067	SEMA3G
		CS16_HsGE1068	PRKCD
		CS16_HsGE1070	KCTD6
		CS16_HsGE1071	FAM3D
		CS16_HsGE1072	SLC25A26
		CS16_HsGE1073	LRIG1
		CS16_HsGE1074	RYBP
		CS16_HsGE1075	PPP4R2
		CS16_HsGE1076	ADCY5
		CS16_HsGE1077	UMPS
		CS16_HsGE1078	ITGB5
		CS16_HsGE1079	EEFSEC
		CS16_HsGE1081	MRPL3
		CS16_HsGE1082	TOPBP1
		CS16_HsGE1085	MRAS
		CS16_HsGE1086	PIK3CB
		CS16_HsGE1087	CLSTN2
		CS16_HsGE1088	SLC25A36
		CS16_HsGE1089	ZBTB38
		CS16_HsGE1090	GRK7
		CS16_HsGE1092	SIAH2
		CS16_HsGE1093	CCNL1
		CS16_HsGE1094	MFSD1
		CS16_HsGE1097	C3orf80
		CS16_HsGE1103	CLDN11
		CS16_HsGE1104	TMEM212
		CS16_HsGE1105	KLHL6
		CS16_HsGE1114	HRASLS
		CS16_HsGE1117	LRRC15
		CS16_HsGE1118	TMEM44
		CS16_HsGE1119	LSG1
		CS16_HsGE1123	NRROS
		CS16_HsGE1124	RNF212
		CS16_HsGE1125	CRIPAK
		CS16_HsGE1126	NKX1-1
		CS16_HsGE1129	WHSC1
		CS16_HsGE1130	ZFYVE28
		CS16_HsGE1137	SORCS2
		CS16_HsGE1138	ABLIM2
		CS16_HsGE1139	HTRA3
		CS16_HsGE1142	HMX1
		CS16_HsGE1144	SOD3
		CS16_HsGE1145	RBM47
		CS16_HsGE1146	CORIN
		CS16_HsGE1147	RASL11B
		CS16_HsGE1148	SPINK2
		CS16_HsGE1149	YTHDC1
		CS16_HsGE1150	2015-09-11
		CS16_HsGE1152	AFF1
		CS16_HsGE1153	ADH7
		CS16_HsGE1155	SEC24B
		CS16_HsGE1156	PRDM5
		CS16_HsGE1157	EDNRA
		CS16_HsGE1159	SFRP2
		CS16_HsGE1160	PLRG1
		CS16_HsGE1161	PALLD
		CS16_HsGE1162	CBR4
		CS16_HsGE1163	NONE
		CS16_HsGE1166	CLDN22
		CS16_HsGE1172	STOX2
		CS16_HsGE1177	IRF2
		CS16_HsGE1178	SORBS2
		CS16_HsGE1179	TLR3
		CS16_HsGE1183	TRIML1
		CS16_HsGE1184	SLC9A3
		CS16_HsGE1185	SLC12A7
		CS16_HsGE1186	SLC6A19
		CS16_HsGE1187	CLPTM1L
		CS16_HsGE1188	LPCAT1
		CS16_HsGE1189	MRPL36
		CS16_HsGE1208	ADAMTS16
		CS16_HsGE1209	ADCY2
		CS16_HsGE1210	SEMA5A
		CS16_HsGE1211	CDH6
		CS16_HsGE1212	PDZD2
		CS16_HsGE1213	GOLPH3
		CS16_HsGE1214	AGXT2
		CS16_HsGE1215	EGFLAM
		CS16_HsGE1216	OSMR
		CS16_HsGE1217	PPAP2A
		CS16_HsGE1218	IL31RA
		CS16_HsGE1219	PIK3R1
		CS16_HsGE1225	IQGAP2
		CS16_HsGE1226	TBCA
		CS16_HsGE1227	MTX3
		CS16_HsGE1228	MTRNR2L2
		CS16_HsGE1229	RIOK2
		CS16_HsGE1231	MAN2A1
		CS16_HsGE1232	WDR36
		CS16_HsGE1233	SEMA6A
		CS16_HsGE1234	SLC22A4
		CS16_HsGE1235	IRF1
		CS16_HsGE1236	VDAC1
		CS16_HsGE1237	TCF7
		CS16_HsGE1241	GFRA3
		CS16_HsGE1242	TMEM173
		CS16_HsGE1243	NRG2
		CS16_HsGE1247	YIPF5
		CS16_HsGE1250	CSF1R
		CS16_HsGE1253	GM2A
		CS16_HsGE1257	GLRA1
		CS16_HsGE1260	CLINT1
		CS16_HsGE1265	IL12B
		CS16_HsGE1280	LCP2
		CS16_HsGE1281	KCNMB1
		CS16_HsGE1282	KCNIP1
		CS16_HsGE1291	DUSP1
		CS16_HsGE1292	RPL26L1
		CS16_HsGE1296	COL23A1
		CS16_HsGE1297	FLT4
		CS16_HsGE1315	MYLK4
		CS16_HsGE1316	CDYL
		CS16_HsGE1321	RIOK1
		CS16_HsGE1322	EEF1E1
		CS16_HsGE1323	SLC35B3
		CS16_HsGE1324	OFCC1
		CS16_HsGE1327	TMEM170B
		CS16_HsGE1328	HIVEP1
		CS16_HsGE1329	TBC1D7
		CS16_HsGE1330	GFOD1
		CS16_HsGE1331	MYLIP
		CS16_HsGE1332	GPX5
		CS16_HsGE1333	MAPK13
		CS16_HsGE1334	COX6A1P2
		CS16_HsGE1335	GLP1R
		CS16_HsGE1336	KCNK5
		CS16_HsGE1337	LRFN2
		CS16_HsGE1338	FOXP4
		CS16_HsGE1339	CCND3
		CS16_HsGE1340	UBR2
		CS16_HsGE1341	TTBK1
		CS16_HsGE1342	MRPS18A
		CS16_HsGE1349	SLC29A1
		CS16_HsGE1350	CDC5L
		CS16_HsGE1355	TMEM30A
		CS16_HsGE1356	HTR1B
		CS16_HsGE1357	NT5E
		CS16_HsGE1358	BACH2
		CS16_HsGE1359	POU3F2
		CS16_HsGE1361	SOBP
		CS16_HsGE1362	FOXO3
		CS16_HsGE1363	RFPL4B
		CS16_HsGE1364	HDDC2
		CS16_HsGE1365	HEY2
		CS16_HsGE1368	UTRN
		CS16_HsGE1369	TAB2
		CS16_HsGE1370	IYD
		CS16_HsGE1371	MTHFD1L
		CS16_HsGE1377	ZDHHC14
		CS16_HsGE1378	FNDC1
		CS16_HsGE1379	SOD2
		CS16_HsGE1380	MAS1
		CS16_HsGE1381	AGPAT4
		CS16_HsGE1382	QKI
		CS16_HsGE1383	RPS6KA2
		CS16_HsGE1384	CCR6
		CS16_HsGE1385	SMOC2
		CS16_HsGE1386	DLL1
		CS16_HsGE1387	FAM20C
		CS16_HsGE1388	PDGFA
		CS16_HsGE1391	MICALL2
		CS16_HsGE1396	SDK1
		CS16_HsGE1399	DFNA5
		CS16_HsGE1400	NFE2L3
		CS16_HsGE1401	PRR15
		CS16_HsGE1402	AQP1
		CS16_HsGE1403	HERPUD2
		CS16_HsGE1404	ELMO1
		CS16_HsGE1405	EPDR1
		CS16_HsGE1406	POU6F2
		CS16_HsGE1409	C7orf69
		CS16_HsGE1410	IKZF1
		CS16_HsGE1411	COBL
		CS16_HsGE1414	WBSCR17
		CS16_HsGE1415	FKBP6
		CS16_HsGE1420	CDK14
		CS16_HsGE1421	COL1A2
		CS16_HsGE1422	SMURF1
		CS16_HsGE1423	SERPINE1
		CS16_HsGE1424	MYL10
		CS16_HsGE1425	CUX1
		CS16_HsGE1426	LMOD2
		CS16_HsGE1429	IMPDH1
		CS16_HsGE1433	BPGM
		CS16_HsGE1434	AKR1D1
		CS16_HsGE1435	HIPK2
		CS16_HsGE1436	ZYX
		CS16_HsGE1437	PRKAG2
		CS16_HsGE1438	ACTR3B
		CS16_HsGE1444	UBE3C
		CS16_HsGE1445	ESYT2
		CS16_HsGE1446	CLN8
		CS16_HsGE1447	MYOM2
		CS16_HsGE1448	ENSG00000182319
		CS16_HsGE1449	BLK
		CS16_HsGE1452	MTMR7
		CS16_HsGE1453	PSD3
		CS16_HsGE1454	SH2D4A
		CS16_HsGE1455	ENTPD4
		CS16_HsGE1456	NKX3-1
		CS16_HsGE1457	NKX2-6
		CS16_HsGE1458	CDCA2
		CS16_HsGE1459	DPYSL2
		CS16_HsGE1460	ESCO2
		CS16_HsGE1461	EXTL3
		CS16_HsGE1462	DUSP4
		CS16_HsGE1463	RBPMS
		CS16_HsGE1464	NRG1
		CS16_HsGE1465	TACC1
		CS16_HsGE1468	NKX6-3
		CS16_HsGE1469	ANK1
		CS16_HsGE1470	SMIM19
		CS16_HsGE1471	CHRNB3
		CS16_HsGE1472	UBE2V2
		CS16_HsGE1473	EFCAB1
		CS16_HsGE1474	SNAI2
		CS16_HsGE1475	CLVS1
		CS16_HsGE1476	XKR9
		CS16_HsGE1477	EYA1
		CS16_HsGE1478	HEY1
		CS16_HsGE1479	CDH17
		CS16_HsGE1480	PTDSS1
		CS16_HsGE1481	SDC2
		CS16_HsGE1484	RPL30
		CS16_HsGE1485	KCNS2
		CS16_HsGE1486	PABPC1
		CS16_HsGE1487	YWHAZ
		CS16_HsGE1488	KLF10
		CS16_HsGE1489	ANGPT1
		CS16_HsGE1490	SLC30A8
		CS16_HsGE1494	TMEM65
		CS16_HsGE1498	LY6D
		CS16_HsGE1499	GLDC
		CS16_HsGE1500	C9orf123
		CS16_HsGE1501	MPDZ
		CS16_HsGE1509	ACER2
		CS16_HsGE1510	AQP7
		CS16_HsGE1511	AQP3
		CS16_HsGE1512	RUSC2
		CS16_HsGE1517	IGFBPL1
		CS16_HsGE1518	GCNT1
		CS16_HsGE1519	SLC28A3
		CS16_HsGE1520	SPIN1
		CS16_HsGE1521	BICD2
		CS16_HsGE1522	BARX1
		CS16_HsGE1523	C9orf3
		CS16_HsGE1532	NANS
		CS16_HsGE1533	TBC1D2
		CS16_HsGE1534	GABBR2
		CS16_HsGE1535	ALG2
		CS16_HsGE1536	RAD23B
		CS16_HsGE1537	EPB41L4B
		CS16_HsGE1538	TXN
		CS16_HsGE1540	AMBP
		CS16_HsGE1543	C9orf91
		CS16_HsGE1550	DBC1
		CS16_HsGE1551	CRB2
		CS16_HsGE1552	NEK6
		CS16_HsGE1560	ENG
		CS16_HsGE1561	NAIF1
		CS16_HsGE1563	FUBP3
		CS16_HsGE1564	QRFP
		CS16_HsGE1567	PPAPDC3
		CS16_HsGE1572	AK8
		CS16_HsGE1573	GTF3C5
		CS16_HsGE1574	COL5A1
		CS16_HsGE1575	LHX3
		CS16_HsGE1576	QSOX2
		CS16_HsGE1577	SHROOM2
		CS16_HsGE1578	MID1
		CS16_HsGE1581	USP9X
		CS16_HsGE1582	BMP15
		CS16_HsGE1583	LAS1L
		CS16_HsGE1588	FAM155B
		CS16_HsGE1589	CXCR3
		CS16_HsGE1592	TCEAL4
		CS16_HsGE1593	TSC22D3
		CS16_HsGE1594	APLN
		CS16_HsGE1595	SASH3
		CS16_HsGE1596	ZDHHC9
		CS16_HsGE1597	ELF4

## Sheet: GainEnhancers&Promoters
# GREAT version 3.0.0	Species assembly: hg19	Association rule: Single nearest gene: 1000000 bp max extension, curated regulatory domains included
	CS16_Hs_gain_enhancer.NearestGene	CS16_Hs_gain_promoter.NearestGene	CS23_Hs_gain_enhancer.NearestGene	CS23_Hs_gain_promoter.NearestGene
unnamed	ACTRT2 (-165508)	ISG15 (+997)	MMEL1 (-174409)	ISG15 (+947)
unnamed	ACTRT2 (-145021)	FAM132A (+4714)	ARHGEF16 (-131690)	TNFRSF4 (+1037)
unnamed	VAMP3 (-423316)	ARHGEF16 (+10985)	ARHGEF16 (-44502)	PLCH2 (+12652)
unnamed	VAMP3 (-346041)	SMIM1 (+1573)	MEGF6 (+20996)	MMEL1 (+21279)
unnamed	VAMP3 (-274866)	CA6 (-1371)	AJAP1 (-324442)	ARHGEF16 (+17660)
unnamed	VAMP3 (-235304)	SLC2A7 (-13321)	AJAP1 (-41617)	SMIM1 (-689)
unnamed	VAMP3 (-209679)	SPSB1 (-11801)	NPHP4 (+577006)	SLC2A7 (-13496)
unnamed	VAMP3 (-184916)	SPSB1 (+57286)	CAMTA1 (+82716)	PIK3CD (+66035)
unnamed	ERRFI1 (-111132)	PIK3CD (+67785)	VAMP3 (-391766)	CASZ1 (+155155)
unnamed	SLC45A1 (-116186)	TARDBP (-31949)	VAMP3 (-211766)	CASZ1 (+146755)
unnamed	CA6 (-31458)	TNFRSF1B (+24928)	VAMP3 (-75379)	EPHA2 (+10232)
unnamed	GPR157 (-35509)	TMEM51 (-221828)	SLC45A1 (+64377)	EPHA2 (+2457)
unnamed	SPSB1 (+30649)	EPHA2 (+6282)	NMNAT1 (+7389)	ARHGEF19 (+6379)
unnamed	SPSB1 (+46799)	ARHGEF10L (+47845)	CASZ1 (-22995)	VWA5B1 (+351)
unnamed	CLSTN1 (+15909)	KLHDC7A (+739)	CASZ1 (-104995)	EPHB2 (+125462)
unnamed	CASZ1 (-17858)	PAX7 (+6425)	TMEM51 (-276365)	GRHL3 (+22210)
unnamed	CASZ1 (-23295)	VWA5B1 (+676)	TMEM51 (-262228)	SLC9A1 (+55351)
unnamed	AGTRAP (+16463)	RUNX3 (+50926)	TMEM51 (-252728)	THEMIS2 (+271)
unnamed	DHRS3 (+184012)	RUNX3 (+1426)	TMEM51 (-180440)	PTPRU (+22135)
unnamed	DHRS3 (+77487)	RPS6KA1 (-4043)	EFHD2 (-38441)	SDC3 (+65070)
unnamed	DHRS3 (+14387)	NR0B2 (-668)	CLCNKB (+38916)	DCDC2B (+80)
unnamed	TMEM51 (-180653)	TRNP1 (+17777)	PADI1 (+7792)	LCK (-1552)
unnamed	TMEM51 (-171790)	SLC9A1 (+54026)	PAX7 (+39500)	RNF19B (-19989)
unnamed	TMEM51 (-163953)	FGR (+1875)	TAS1R2 (+75113)	CSF3R (+666)
unnamed	TMEM51 (-156065)	TMEM200B (-2100)	IFFO2 (-54795)	GRIK3 (+179913)
unnamed	TMEM51 (-73315)	PTPRU (+47247)	VWA5B1 (-7987)	MACF1 (+131129)
unnamed	CLCNKB (+40003)	LAPTM5 (+1279)	CAMK2N1 (+12938)	COL9A2 (+4203)
unnamed	EPHA2 (-18581)	SDC3 (+63258)	RAP1GAP (+18935)	IPO13 (+6427)
unnamed	EPHA2 (-26956)	PTP4A2 (-5412)	WNT4 (+9121)	HPDL (+68)
unnamed	PADI1 (+6167)	LCK (-1290)	WNT4 (-42454)	PODN (+12015)
unnamed	ARHGEF10L (-23330)	SYNC (-39043)	WNT4 (-67229)	FGGY (-149928)
unnamed	IFFO2 (-53645)	COL8A2 (-4)	WNT4 (-80054)	KANK4 (+47085)
unnamed	CAMK2N1 (+12663)	CSF3R (+8591)	WNT4 (-92179)	CTH (+295420)
unnamed	HSPG2 (-6323)	CSF3R (+816)	WNT4 (-103229)	LHX8 (-2394)
unnamed	WNT4 (+9421)	GRIK3 (+180551)	KDM1A (-143336)	LHX8 (+5044)
unnamed	WNT4 (+5834)	CDCA8 (+32685)	ID3 (-35290)	SYCP1 (+314)
unnamed	WNT4 (-19766)	FHL3 (+4689)	EYA3 (-16468)	PDE4DIP (-16)
unnamed	WNT4 (-67166)	HEYL (+4404)	PTPRU (+147110)	APH1A (-3751)
unnamed	WNT4 (-81154)	CITED4 (+38943)	LAPTM5 (-28396)	C1orf56 (+309)
unnamed	WNT4 (-91916)	SLC2A1 (+26501)	SYNC (-13818)	S100A6 (+120)
unnamed	WNT4 (-112516)	HYI (+17360)	TRIM62 (+12342)	S100A2 (-1884)
unnamed	KDM1A (-142298)	B4GALT2 (+16891)	ZNF362 (+27639)	SLC27A3 (+19232)
unnamed	ID3 (-15603)	RNF220 (+1872)	EVA1B (-27058)	ADAR (-243)
unnamed	RUNX3 (+23988)	PDZK1IP1 (+8689)	ZC3H12A (-155953)	C1orf85 (+4025)
unnamed	RUNX3 (+6526)	FOXD2 (+299)	ZC3H12A (-72290)	PEAR1 (+19863)
unnamed	RUNX3 (-6412)	TRABD2B (+230142)	ZC3H12A (-39653)	PEAR1 (+33913)
unnamed	LDLRAP1 (-11746)	TRABD2B (+194442)	MACF1 (+49616)	TAGLN2 (+1709)
unnamed	MED18 (-32036)	TRABD2B (+181679)	BMP8A (-93018)	FCRLB (+5260)
unnamed	LAPTM5 (-28083)	PODN (+13865)	HPCAL4 (-9889)	NUF2 (+269)
unnamed	TINAGL1 (-6773)	TMEM61 (-877)	FOXO6 (-19794)	LAMC2 (+92727)
unnamed	SYNC (-26768)	FGGY (-149890)	LEPRE1 (-18305)	KIF21B (+31965)
unnamed	SYNC (-56880)	FGGY (+256447)	FOXD2 (+137074)	TMEM9 (-16757)
unnamed	TRIM62 (+10767)	KANK4 (+46922)	FOXD2 (+194299)	LMOD1 (+77)
unnamed	GJA4 (+33089)	RAVER2 (+95372)	FOXD2 (+215774)	PPFIA4 (-5861)
unnamed	SMIM12 (+23242)	INSL5 (+48751)	TRABD2B (+165567)	LRRN2 (-40167)
unnamed	PSMB2 (-57993)	CTH (+295408)	TRABD2B (+80867)	RD3 (+809)
unnamed	COL8A2 (-9204)	NEXN (+75)	SPATA6 (-138668)	ATF3 (-262)
unnamed	EVA1B (-27420)	SYDE2 (-234)	ELAVL4 (+33736)	EPHX1 (-255)
unnamed	RSPO1 (-17184)	CYR61 (-1969)	ELAVL4 (+77374)	OBSCN (+5282)
unnamed	MACF1 (+49704)	COL24A1 (+771)	ELAVL4 (+139699)	OBSCN (+68257)
unnamed	EDN2 (-38021)	TGFBR3 (+324)	DMRTA2 (-7391)	GPR137B (+768)
unnamed	LEPRE1 (-18230)	EPS8L3 (+2161)	C8A (-10091)	DIP2C (+38668)
unnamed	SLC2A1 (+22038)	TBX15 (+2366)	FGGY (-139915)	KLF6 (+283754)
unnamed	SLC2A1 (+11713)	PDE4DIP (+309)	KANK4 (+262035)	SFMBT2 (-76110)
unnamed	SLC2A1 (-20299)	APH1A (-3476)	KANK4 (-18340)	CUBN (+105592)
unnamed	KLF17 (-49972)	ANXA9 (-305)	CACHD1 (+9013)	SPAG6 (+151)
unnamed	RNF220 (+12372)	C1orf56 (+234)	CTBS (-9078)	SYT15 (-60)
unnamed	TMEM53 (+108489)	S100A6 (-705)	CYR61 (+35294)	NPY4R (-96)
unnamed	DMBX1 (-48156)	S100A1 (+2)	ZNF326 (+110076)	HK1 (+50400)
unnamed	DMBX1 (-18319)	SLC27A3 (+18557)	BARHL2 (+10194)	COL13A1 (+77337)
unnamed	TAL1 (+17730)	IL6R (+27294)	BCAR3 (+154643)	C10orf105 (+187315)
unnamed	FOXE3 (-26156)	TDRD10 (-635)	BCAR3 (+137856)	POLR3A (+19315)
unnamed	FOXD2 (+8886)	ADAR (-156)	BCAR3 (+32406)	CH25H (-17717)
unnamed	FOXD2 (+13861)	C1orf85 (+3975)	CDC14A (+9953)	WBP1L (+32273)
unnamed	FOXD2 (+125386)	PEAR1 (-12312)	KCNC4 (-8232)	GSTO1 (-22455)
unnamed	FOXD2 (+130924)	PEAR1 (+5101)	KCNC4 (+32218)	GSTO2 (+6049)
unnamed	FOXD2 (+192161)	PEAR1 (+20476)	ADORA3 (-4565)	EMX2 (+192708)
unnamed	FOXD2 (+215086)	TAGLN2 (+1572)	PDE4DIP (-28353)	CTBP2 (+24259)
unnamed	FOXD2 (+240836)	PVRL4 (+5051)	PDE4DIP (-33753)	STK32C (-29181)
unnamed	TRABD2B (+272154)	FCRLB (+5235)	PDE4DIP (-97528)	PKP3 (+2783)
unnamed	TRABD2B (+169567)	DDR2 (+820)	KCNN3 (+56343)	EPS8L2 (+20258)
unnamed	TRABD2B (+155617)	PIGC (+299251)	KRTCAP2 (+6159)	TSPAN4 (+25779)
unnamed	TRABD2B (+121729)	PIGC (-5974)	PEAR1 (-6812)	MUC6 (+29168)
unnamed	TRABD2B (+115067)	LAMC2 (+95390)	CD244 (+25325)	MRPL23 (+43317)
unnamed	TRABD2B (+82292)	TMEM9 (-17370)	DDR2 (+63770)	TPP1 (+617)
unnamed	TRABD2B (-43171)	LMOD1 (+502)	LMX1A (+80777)	CSNK2A3 (+109304)
unnamed	DMRTA2 (+73284)	ELF3 (+2590)	CD247 (+25912)	OTOG (+193)
unnamed	SSBP3 (+14354)	GPR37L1 (+364)	KIFAP3 (-23289)	TSPAN18 (-2788)
unnamed	JUN (-198565)	LRRN2 (-42030)	PRDX6 (+30670)	PTPRJ (+37912)
unnamed	JUN (-231590)	RD3 (+1209)	ZNF648 (+31859)	RTN4RL2 (+16028)
unnamed	FGGY (-156528)	ATF3 (-499)	NPL (-52631)	MS4A10 (+979)
unnamed	FGGY (-145615)	PTPN14 (-384)	NPL (+10181)	DDB1 (-11925)
unnamed	FGGY (-82740)	ADCK3 (+88413)	LRRN2 (+43470)	PPP1R32 (+16308)
unnamed	KANK4 (-18253)	WNT3A (+1186)	LRRN2 (-17280)	FADS3 (-7532)
unnamed	ROR1 (-27526)	GJC2 (-1015)	EIF2D (+36304)	FADS3 (-12969)
unnamed	UBE2U (-7777)	OBSCN (+2069)	HHAT (-35350)	AHNAK (-631)
unnamed	CYR61 (+35244)	OBSCN (+68044)	HHAT (+207575)	RPS6KA4 (-5268)
unnamed	ZNF326 (+110151)	GPR137B (+743)	HHAT (+378813)	LTBP3 (+11411)
unnamed	CDC7 (+45585)	IDI1 (-72265)	ATF3 (-41687)	EFEMP2 (+4064)
unnamed	CDC7 (+65110)	IDI1 (-308940)	PROX1 (-7923)	ADRBK1 (+10494)
unnamed	CDC7 (+84698)	CALML3 (-524)	SMYD2 (-72401)	TMEM134 (+4430)
unnamed	CDC7 (+100860)	PRKCQ (+225)	CAPN2 (-5509)	TBX10 (-1319)
unnamed	CDC7 (+110873)	SFMBT2 (-123172)	SRP9 (-14668)	CCND1 (-160755)
unnamed	TGFBR3 (+149049)	GATA3 (-1443)	C1orf95 (+27849)	CCND1 (+17108)
unnamed	TGFBR3 (+121424)	SPAG6 (+89)	C1orf95 (+91712)	CTTN (+104628)
unnamed	TGFBR3 (+80612)	KIAA1217 (+46595)	ITPKB (+15701)	PDE2A (-38191)
unnamed	BCAR3 (+170981)	BAMBI (+130379)	ADCK3 (+48413)	ARAP1 (+30623)
unnamed	BCAR3 (+145206)	FXYD4 (+3923)	ARF1 (-9313)	PLEKHB1 (+14915)
unnamed	BCAR3 (+137581)	C10orf128 (+11104)	DISC1 (+302564)	KCNE3 (+198)
unnamed	BCAR3 (+107293)	PRKG1 (-81984)	IRF2BP2 (-66292)	CHRDL2 (+48045)
unnamed	BCAR3 (+88831)	HK1 (+49763)	NID1 (+44587)	RPS3 (+25114)
unnamed	BCAR3 (+32206)	C10orf35 (+34624)	ZP4 (-568369)	SERPINH1 (+35848)
unnamed	SLC44A3 (+39044)	COL13A1 (+1800)	ADSS (+89773)	MYO7A (-1560)
unnamed	AHCYL1 (-24145)	H2AFY2 (-99077)	SMYD3 (+346056)	DLAT (-41738)
unnamed	ALX3 (-18728)	NODAL (+798)	DIP2C (+74793)	BACE1 (+16022)
unnamed	UBL4B (-6562)	PRF1 (+2856)	IDI1 (-61528)	PHLDB1 (+28670)
unnamed	KCNC4 (+32768)	USP54 (+33945)	IDI1 (-315928)	MCAM (-2374)
unnamed	ADORA3 (-4590)	MYOZ1 (+190)	PFKP (-137662)	RNF26 (+5188)
unnamed	VANGL1 (-96174)	ZNF503 (-28499)	PFKP (-117087)	TRIM29 (+15136)
unnamed	WARS2 (-86706)	C10orf11 (+251881)	PFKP (+23751)	TRIM29 (-45339)
unnamed	PDE4DIP (-19891)	ADIRF (-4699)	PITRM1 (-242422)	C11orf45 (+1967)
unnamed	PDE4DIP (-28303)	ACTA2 (+209)	CALML3 (+23601)	IGSF9B (+7005)
unnamed	PDE4DIP (-97366)	MARVELD1 (+219)	CALML3 (+29564)	JAM3 (-42320)
unnamed	BCL9 (+45506)	SEC31B (+14716)	CALML3 (+62101)	JAM3 (-29595)
unnamed	ADAMTSL4 (-11485)	PAX2 (-8093)	ASB13 (+7353)	B4GALNT3 (+82033)
unnamed	KRTCAP2 (+6371)	FGF8 (+166)	PRKCQ (-296987)	ERC1 (+113234)
unnamed	ETV3L (-6588)	GSTO1 (-22443)	UPF2 (+122596)	ANO2 (+1023)
unnamed	DDR2 (+63995)	EMX2 (+192733)	CAMK1D (+151382)	PHB2 (+8338)
unnamed	CD247 (+1100)	RGS10 (+4932)	CAMK1D (+189257)	C1RL (+494)
unnamed	PIGC (+53113)	BAG3 (+281)	ACBD7 (+4175)	DUSP16 (+40954)
unnamed	SUCO (-36219)	CTBP2 (+23009)	NMT2 (-53846)	SYT10 (+729)
unnamed	ZNF648 (+31859)	MMP21 (+990)	TMEM236 (-39113)	SLC38A4 (+55)
unnamed	NMNAT2 (+101199)	EBF3 (+194630)	NEBL (-97332)	ENDOU (-15069)
unnamed	IGFN1 (-14403)	EBF3 (-1070)	SKIDA1 (+210586)	COL2A1 (-19706)
unnamed	IGFN1 (-6103)	INPP5A (-18261)	PIP4K2A (+159859)	TUBA1C (+3610)
unnamed	NAV1 (+83136)	NKX6-2 (+77181)	PIP4K2A (-91529)	C1QL4 (-917)
unnamed	SHISA4 (+19852)	PKP3 (+2546)	KIAA1217 (+174332)	KCNH3 (+5223)
unnamed	SHISA4 (+28352)	EPS8L2 (+4033)	KIAA1217 (+207157)	AQP2 (-4416)
unnamed	LMOD1 (+6002)	TSPAN4 (+25167)	SVIL (-106283)	KRT8 (+20553)
unnamed	ELF3 (+10540)	MUC2 (-487)	NRP1 (+147090)	STAT6 (-122)
unnamed	SOX13 (+19493)	SYT8 (-1349)	NRP1 (+63102)	XPOT (-256905)
unnamed	SOX13 (+29306)	CD81 (+10776)	PARD3 (+6061)	HMGA2 (+58027)
unnamed	MFSD4 (-25217)	CDKN1C (+37911)	NAMPTL (+74187)	GLIPR1L2 (+138)
unnamed	NEK2 (-23553)	TPP1 (+529)	CXCL12 (+73709)	USP44 (+3966)
unnamed	NENF (+30984)	TPP1 (-11033)	TMEM72 (-7835)	NEDD1 (+78456)
unnamed	NENF (+55809)	ST5 (+78560)	SYT15 (-4373)	CHPT1 (+420)
unnamed	NENF (+81196)	MRVI1 (+299)	GPRIN2 (+10312)	PAH (+143)
unnamed	ATF3 (-42187)	PARVA (+163006)	NPY4R (+24041)	KCTD10 (+36211)
unnamed	BATF3 (+21589)	C11orf58 (+51827)	PHYHIPL (-194587)	UBE3B (+41641)
unnamed	PROX1 (-7898)	OTOG (+205)	C10orf35 (+26899)	TRPV4 (+85683)
unnamed	SMYD2 (-94488)	DBX1 (-2255)	COL13A1 (-44238)	SDSL (-104)
unnamed	SMYD2 (-87688)	WT1 (+4601)	EIF4EBP2 (-40247)	LHX5 (+439)
unnamed	SRP9 (-14731)	CD59 (+12522)	PALD1 (+21236)	RBM19 (+33261)
unnamed	SRP9 (-7593)	ELF5 (-1892)	PRF1 (+41968)	RAB35 (+23168)
unnamed	LEFTY1 (-10192)	PRR5L (-13292)	PCBD1 (-153422)	KDM2B (+56826)
unnamed	C1orf95 (+40637)	CREB3L1 (+15851)	UNC5B (-20839)	SLC15A4 (+6453)
unnamed	C1orf95 (+80412)	SPI1 (+729)	C10orf105 (+137490)	FOXO1 (+314884)
unnamed	ITPKB (+15039)	SLC39A13 (-14167)	C10orf105 (+115903)	SLC25A30 (+390)
unnamed	ADCK3 (+47638)	MYRF (-5621)	ZNF503 (+48651)	CKAP2 (+173)
unnamed	IRF2BP2 (-168379)	MYRF (+13104)	ZNF503 (+22651)	REC8 (+351)
unnamed	IRF2BP2 (-267142)	RAB3IL1 (+12297)	C10orf11 (+225631)	NKX2-1 (+6058)
unnamed	TOMM20 (+169213)	SART1 (-15372)	ZMIZ1 (+89371)	GCH1 (+129182)
unnamed	NID1 (+44774)	LRFN4 (+50265)	PLAC9 (+5173)	JKAMP (+80439)
unnamed	ADSS (+111436)	CABP2 (-858)	GRID1 (+502172)	JKAMP (+92127)
unnamed	EFCAB2 (+48692)	ORAOV1 (+17015)	GRID1 (+287035)	SIX6 (+6419)
unnamed	KIF26B (+25551)	ANO1 (+6842)	GRID1 (+122635)	PLEKHG3 (+19996)
unnamed	KIF26B (+209726)	ARAP1 (+38348)	FFAR4 (+14453)	PAPLN (-142)
unnamed	DIP2C (-97194)	ARAP1 (+31148)	PDLIM1 (-4419)	CHGA (-36500)
unnamed	IDI1 (-105915)	KCNE3 (+10)	SORCS3 (+15604)	BDKRB2 (+90)
unnamed	IDI1 (-203615)	CHRDL2 (+48782)	NONE	BDKRB1 (-23098)
unnamed	ADARB2 (+253007)	CHRDL2 (+33857)	SORCS1 (+60634)	CCNK (+42417)
unnamed	ADARB2 (+221207)	CHRDL2 (+10432)	TCF7L2 (-216821)	DEGS2 (+19112)
unnamed	ADARB2 (+168257)	ARRB1 (+44486)	TCF7L2 (+237191)	WARS (-5021)
unnamed	ADARB2 (+109470)	WNT11 (-10499)	EMX2 (-39955)	RTL1 (+50184)
unnamed	CALML5 (+31458)	MYO7A (+815)	RAB11FIP2 (+241926)	RTL1 (+26446)
unnamed	CALML5 (+12920)	MYO7A (+43128)	GRK5 (+110774)	RTL1 (+9521)
unnamed	CALML3 (+8051)	CWC15 (+46476)	SEC23IP (+184777)	ENSG00000269375 (+7335)
unnamed	CALML3 (+31239)	POU2AF1 (-37908)	PLEKHA1 (-140599)	ENSG00000269375 (+169510)
unnamed	ASB13 (+6428)	TAGLN (-2126)	GPR26 (-206283)	DIO3 (-152738)
unnamed	ITIH5 (+119534)	BACE1 (+15972)	GPR26 (+93767)	DIO3 (-1100)
unnamed	GATA3 (-19181)	MPZL2 (-53)	LHPP (+127596)	ASPG (+17972)
unnamed	UPF2 (+122696)	CXCR5 (+4588)	CTBP2 (-14454)	TEX22 (-3832)
unnamed	CAMK1D (+151657)	DCPS (+34616)	CTBP2 (-147041)	APBA2 (+203980)
unnamed	CCDC3 (+217109)	JAM3 (-26657)	CTBP2 (-342879)	NDNL2 (+199233)
unnamed	PRPF18 (+369548)	NINJ2 (+31770)	MGMT (-600135)	NDNL2 (-108630)
unnamed	FRMD4A (+346395)	NINJ2 (-130)	MGMT (-410923)	GREM1 (+144038)
unnamed	TMEM236 (-38776)	FKBP4 (-143969)	EBF3 (+153717)	C15orf62 (-434)
unnamed	PIP4K2A (+160296)	TEAD4 (+245)	EBF3 (+99817)	TRIM69 (+102)
unnamed	BAMBI (+220267)	ANO2 (+1185)	EBF3 (+29755)	ALDH1A2 (+653)
unnamed	BAMBI (+262379)	PLEKHG6 (+3626)	GLRX3 (+778262)	ANXA2 (+22509)
unnamed	LYZL1 (-85290)	SCNN1A (-1273)	PPP2R2D (-630280)	TPM1 (-145771)
unnamed	LYZL1 (-34727)	GAPDH (+7307)	PPP2R2D (-546555)	CA12 (+1960)
unnamed	SVIL (+117292)	PTPN6 (+6729)	PPP2R2D (-516592)	CLPX (+55)
unnamed	SVIL (-105845)	C1RL (+306)	PPP2R2D (-456767)	ANP32A (+26734)
unnamed	LYZL2 (-189109)	RASSF8 (-241)	PPP2R2D (-264992)	LMAN1L (+4368)
unnamed	ZNF438 (-69997)	FAM60A (-43832)	PPP2R2D (-13092)	CRABP1 (+784)
unnamed	ZEB1 (+299262)	SLC38A4 (+80)	NKX6-2 (+100856)	CHRNA5 (+1213)
unnamed	NRP1 (+62715)	ENDOU (-11894)	MUC5B (-2158)	CTSH (-34617)
unnamed	PARD3 (+76299)	RAPGEF3 (+6678)	IGF2 (+42543)	IL16 (-91503)
unnamed	RET (-101462)	HDAC7 (-12845)	TH (-15115)	AKAP13 (+163140)
unnamed	RET (-86237)	TMEM106C (-20728)	TH (-26440)	KLHL25 (+105123)
unnamed	TMEM72 (-6985)	COL2A1 (-25944)	TH (-40815)	NTRK3 (+678748)
unnamed	GPRIN2 (+9799)	BCDIN3D (+34412)	ASCL2 (+9069)	IDH2 (+39361)
unnamed	ANXA8L1 (+43677)	FAIM2 (-6168)	CDKN1C (+151248)	NR2F2 (+29979)
unnamed	GDF10 (-134699)	ACVRL1 (+5486)	CDKN1C (+136536)	LRRK1 (+129593)
unnamed	WDFY4 (+30812)	GRASP (+7814)	CDKN1C (+97161)	LRRK1 (+145468)
unnamed	VSTM4 (+20254)	C12orf44 (+11258)	CDKN1C (+93861)	CHSY1 (+8849)
unnamed	C10orf128 (-84746)	KRT8 (+20665)	CDKN1C (+78736)	RHOT2 (-7273)
unnamed	OGDHL (-69544)	AMHR2 (+974)	CDKN1C (+59823)	BAIAP3 (+1470)
unnamed	SRGN (-26174)	NFE2 (+1817)	OLFML1 (+9162)	NTHL1 (-43808)
unnamed	C10orf35 (+27649)	COPZ1 (+3102)	TRIM66 (+60613)	TMEM114 (+938)
unnamed	C10orf35 (+55574)	ERBB3 (+905)	PLEKHA7 (+68021)	KDM8 (-136771)
unnamed	COL13A1 (-64313)	LRP1 (+21668)	PAX6 (-64754)	IL21R (+230)
unnamed	COL13A1 (-43338)	GNS (-21648)	RCN1 (-103512)	SPN (+2533)
unnamed	COL13A1 (-33888)	MSRB3 (+140)	PRR5L (-116055)	NLRC5 (-122)
unnamed	COL13A1 (+8862)	LGR5 (+225)	TRAF6 (+49659)	KIFC3 (+26912)
unnamed	COL13A1 (+38612)	GLIPR1L2 (+238)	ALKBH3 (+82049)	NOL3 (+383)
unnamed	C10orf105 (+173465)	ACSS3 (+860)	SYT13 (-61055)	PLEKHG4 (+1812)
unnamed	PLAU (+39160)	ALX1 (-547)	CHST1 (+164834)	ZFHX3 (-435389)
unnamed	VCL (-31597)	NEDD1 (+78469)	CD5 (-30429)	PKD1L2 (+25)
unnamed	ZNF503 (+48889)	PAH (+218)	AHNAK (+45632)	GINS2 (+26930)
unnamed	C10orf11 (+229419)	GLT8D2 (+377)	EHD1 (+14953)	BANP (-12299)
unnamed	C10orf11 (+268156)	RFX4 (+885)	PC (+44072)	CXCL16 (+226)
unnamed	C10orf11 (+331156)	TMEM119 (+3612)	SYT12 (-4136)	SPEM1 (-491)
unnamed	KCNMA1 (+72325)	KCTD10 (+16199)	LRP5 (+15973)	SOX15 (+813)
unnamed	ZCCHC24 (-22892)	MMAB (-15784)	TPCN2 (+53610)	ENSG00000251537 (-1421)
unnamed	PLAC9 (+4673)	C12orf52 (+9207)	TPCN2 (+169773)	ADORA2B (+469)
unnamed	OPN4 (-3389)	SDSL (-254)	TPCN2 (+201148)	ATPAF2 (+10682)
unnamed	KLLN (-300844)	RAB35 (+23343)	TPCN2 (+219298)	ALKBH5 (-30278)
unnamed	LIPA (+10840)	RPLP0 (-15536)	CCND1 (-261392)	ALKBH5 (-1103)
unnamed	MYOF (+44713)	RPLP0 (-19848)	FGF3 (-56096)	CCL2 (-241)
unnamed	MYOF (+36363)	ACADS (+36150)	FGF3 (-71733)	ASB16 (+76)
unnamed	ANKRD2 (-31310)	RHOF (+4530)	FADD (-28069)	MYL4 (+11760)
unnamed	ANKRD2 (-23385)	HPD (+365)	CTTN (+153091)	TTLL6 (-437)
unnamed	AVPI1 (+3292)	MLXIP (-14803)	CTTN (+219916)	KAT7 (+27221)
unnamed	HIF1AN (+34697)	FZD10 (-54)	CTTN (+243603)	PDK2 (+6474)
unnamed	XPNPEP1 (+466573)	GPR133 (+1486)	ARAP1 (+36110)	PPP1R9B (+26527)
unnamed	TCF7L2 (-116084)	P2RX2 (-14090)	GAB2 (+66477)	SPAG9 (+63551)
unnamed	HABP2 (-194735)	C1QTNF9B (-6719)	TENM4 (-152630)	MKS1 (+78)
unnamed	AFAP1L2 (+56894)	GTF3A (-20668)	EED (-41886)	CYB561 (+8307)
unnamed	AFAP1L2 (-111844)	MAB21L1 (+5119)	DRD2 (-103627)	CDC42EP4 (-50949)
unnamed	EMX2 (+26470)	MAB21L1 (-468)	ZBTB16 (-23202)	LGALS3BP (+2266)
unnamed	RAB11FIP2 (-239536)	MAB21L1 (-220156)	ZBTB16 (+31398)	CBX4 (-97372)
unnamed	GRK5 (+64012)	FOXO1 (+102146)	NNMT (-64303)	TBC1D16 (+85434)
unnamed	GRK5 (+160574)	RGCC (+90993)	CADM1 (-537680)	SLC38A10 (+9892)
unnamed	FGFR2 (-46333)	DLEU1 (+140181)	CEP164 (+6242)	TGIF1 (+143388)
unnamed	PLEKHA1 (-140224)	CKAP2 (-114)	CXCR5 (-13312)	SOGA2 (+63056)
unnamed	HMX3 (-17928)	RAB20 (+542)	TRIM29 (+120861)	SOGA2 (+83519)
unnamed	HMX3 (-3190)	CARKD (+33005)	GRIK4 (+15757)	ABHD3 (+22566)
unnamed	GPR26 (-192633)	PROZ (-16005)	GRIK4 (+155807)	GATA6 (+1046)
unnamed	LHPP (+15984)	PROZ (+2882)	OR10D3 (-13948)	KLHL14 (+1812)
unnamed	LHPP (+127584)	ATP4B (+2901)	FEZ1 (+119743)	PSTPIP2 (+201)
unnamed	CTBP2 (-29704)	GRK1 (+1830)	FEZ1 (+102068)	PMAIP1 (+245)
unnamed	CTBP2 (-163716)	MMP14 (+13234)	ST3GAL4 (+258436)	SERPINB8 (+816)
unnamed	CLRN3 (+18123)	PAX9 (-4582)	KIRREL3 (-108170)	ZNF516 (-30379)
unnamed	MKI67 (-349751)	PAX9 (+705)	FLI1 (+26373)	CDC34 (+649)
unnamed	MKI67 (-448101)	PAX9 (+4793)	FLI1 (+40010)	FSTL3 (-317)
unnamed	MGMT (-601273)	FOXA1 (+1114)	FLI1 (+52185)	TRIP10 (+5072)
unnamed	MGMT (-517010)	FOXA1 (-4286)	KCNJ5 (-20063)	RAVER1 (-272)
unnamed	MGMT (-445135)	ATP5S (+24091)	NFRKB (+31029)	TMEM221 (+338)
unnamed	MGMT (-64273)	PYGL (+23441)	ADAMTS8 (-6175)	LRRC25 (+102)
unnamed	MGMT (+47877)	NID2 (+74)	C11orf44 (-92788)	NDUFA13 (-52934)
unnamed	MGMT (+185940)	GCH1 (+129257)	C11orf44 (-71113)	PRODH2 (+15513)
unnamed	MGMT (+190602)	JKAMP (+92127)	C11orf44 (+46799)	KIRREL2 (-624)
unnamed	MGMT (+213702)	C14orf39 (+389)	C11orf44 (+65149)	CAPN12 (+22326)
unnamed	EBF3 (+162992)	SIX6 (+6444)	NTM (-99468)	NCCRP1 (-351)
unnamed	EBF3 (+79817)	SIX1 (+1105)	IGSF9B (-11470)	LTBP4 (+16922)
unnamed	EBF3 (+49805)	SIX1 (-5758)	IGSF9B (-18195)	LENG8 (-13415)
unnamed	EBF3 (+28855)	TMEM30B (+93383)	IGSF9B (-51608)	SUV420H2 (+7054)
unnamed	EBF3 (+22630)	PAPLN (-392)	JAM3 (-17257)	TMEM190 (+1371)
unnamed	EBF3 (+13667)	PNMA1 (-12247)	FBXL14 (+33993)	DCDC2C (-165)
unnamed	GLRX3 (+56425)	ISCA2 (+58190)	FBXL14 (+14081)	ID2 (-94862)
unnamed	PPP2R2D (-546905)	LTBP2 (+346)	FBXL14 (-11294)	PQLC3 (-21973)
unnamed	NKX6-2 (+99693)	RIN3 (-70493)	PRMT8 (-34364)	ROCK2 (-4664)
unnamed	MRPL23 (+76767)	RIN3 (-63243)	CD9 (-5718)	ZFP36L2 (+183285)
unnamed	IGF2 (+45405)	LGMN (+98561)	GRIN2B (+384003)	SIX3 (+298)
unnamed	IGF2 (+32080)	ASB2 (+20174)	ST8SIA1 (+12823)	BCL11A (+200195)
unnamed	IGF2 (+26493)	SLC25A47 (+614)	FGD4 (+47444)	MEIS1 (+138418)
unnamed	IGF2 (+19105)	RTL1 (+26696)	OR10AD1 (+4932)	DYSF (+31)
unnamed	TH (-14928)	RTL1 (+5971)	AQP2 (-12241)	M1AP (-61)
unnamed	TH (-31953)	ENSG00000269375 (+7748)	ANKRD33 (-48431)	CHMP3 (-26605)
unnamed	ASCL2 (+9544)	DIO3 (+325)	SP1 (+10022)	CNGA3 (-12093)
unnamed	KCNQ1 (+91642)	RCOR1 (-7898)	HOXC13 (-70072)	CNGA3 (+1895)
unnamed	KCNQ1 (+110354)	ADSSL1 (+4842)	SMUG1 (-39785)	RFX8 (-2760)
unnamed	KCNQ1 (+116304)	PLD4 (+6353)	OR10P1 (+9794)	MALL (+743)
unnamed	CDKN1C (+157936)	GPR132 (-796)	LRP1 (+7431)	GPR17 (+8136)
unnamed	CDKN1C (+85073)	TEX22 (-7045)	HMGA2 (-94811)	FAM168B (+53276)
unnamed	CDKN1C (+59748)	CRIP1 (+11946)	TMTC2 (+21841)	GALNT5 (+465)
unnamed	DCHS1 (+8835)	MTMR10 (-32668)	NEDD1 (+83631)	LRP2 (-318)
unnamed	CYB5R2 (+79076)	GREM1 (+143713)	NEDD1 (+223806)	HOXD10 (-23644), HOXD11 (-14351), HOXD12 (-6795), HOXD13 (+44)
unnamed	WEE1 (+28085)	SPTBN5 (+512)	TMPO (-154833)	HOXD8 (-468)
unnamed	WEE1 (+38672)	EHD4 (-18524)	APAF1 (+225419)	PLEKHA3 (+42993)
unnamed	FAR1 (+207621)	PLA2G4E (-19275)	RFX4 (-6465)	FZD5 (+849)
unnamed	INSC (+551718)	ONECUT1 (-15104)	PWP1 (-39484)	MARCH4 (+22262)
unnamed	C11orf58 (+124490)	CGNL1 (+28210)	TRPV4 (+106558)	IGFBP2 (-28068)
unnamed	LGR4 (+12530)	ALDH1A2 (+591)	TRPV4 (+37858)	PTPRN (+10307)
unnamed	LMO2 (-44039)	FOXB1 (-4196)	C12orf76 (+24350)	FAM124B (+276)
unnamed	EHF (-45998)	ANXA2 (+22184)	CUX2 (+34672)	SP110 (-123)
unnamed	PAMR1 (-22379)	TPM1 (-155271)	LHX5 (-119823)	EFHD1 (+1025)
unnamed	ALX4 (-29484)	TPM1 (-146409)	RBM19 (+85661)	GBX2 (-42538)
unnamed	CD82 (-44791)	TPM1 (-221)	TESC (+36549)	HDAC4 (+236393)
unnamed	CD82 (-28316)	HERC1 (-81988)	TESC (+7774)	AGXT (+24429)
unnamed	MAPK8IP1 (+7848)	RBPMS2 (+236)	SUDS3 (+144503)	DTYMK (+20256)
unnamed	CREB3L1 (-24549)	CLPX (+92)	SUDS3 (+235215)	SDCBP2 (+18245)
unnamed	PTPRJ (-6475)	RAB11A (+47429)	HSPB8 (+51528)	POLR3F (-52271)
unnamed	PTPRJ (+38512)	LCTL (-2278)	CCDC64 (+22502)	NKX2-4 (+1353)
unnamed	PTPRJ (+75137)	PAQR5 (+44246)	CCDC64 (+51627)	WISP2 (-122)
unnamed	PTPRJ (+116125)	SENP8 (-309042)	MLEC (-17722)	WISP2 (+5528)
unnamed	OR4B1 (-115256)	CD276 (+57309)	KDM2B (+67039)	PABPC1L (+260)
unnamed	OR4B1 (-111944)	ACSBG1 (+26311)	TMEM132C (+57977)	SULF2 (+27867)
unnamed	TNKS1BP1 (+33821)	CRABP1 (-603)	TMEM132C (+246177)	PARD6B (-40068)
unnamed	CD5 (-30142)	CRABP1 (+7697)	GLT1D1 (+211057)	PPP4R1L (+80795)
unnamed	SCGB1A1 (-18632)	CHRNA5 (+151)	GJB6 (-69279)	TAF4 (+311091)
unnamed	SCGB1A1 (+61093)	CTSH (-34317)	SHISA2 (+166881)	TCFL5 (+340)
unnamed	AHNAK (+45794)	CTSH (-50742)	SHISA2 (+78269)	DIDO1 (+22999)
unnamed	AHNAK (+40157)	MESDC2 (+57081)	WASF3 (+4151)	SLC17A9 (+1061)
unnamed	PYGM (-3256)	IL16 (-29766)	BRCA2 (+94533)	NKAIN4 (+6529)
unnamed	EHD1 (+14703)	STARD5 (+20678)	DCLK1 (+29793)	COL20A1 (+28112)
unnamed	RHOD (+21186)	ALPK3 (+2327)	RGCC (+90918)	UCKL1 (+6955)
unnamed	CLCF1 (-5667)	AKAP13 (+201478)	RCBTB2 (-61319)	CHODL (+525)
unnamed	TPCN2 (+73460)	ANPEP (+11969)	DLEU1 (+275743)	CYYR1 (+453)
unnamed	TPCN2 (+201960)	ANPEP (+8306)	DLEU1 (+304518)	C21orf59 (+9026)
unnamed	TPCN2 (+221260)	NR2F2 (+29192)	DLEU1 (+311318)	OLIG1 (+1050)
unnamed	TPCN2 (+229298)	PGPEP1L (+105091)	ABCC4 (-53355)	RIPK4 (+88016)
unnamed	CCND1 (-261892)	ALDH1A3 (-29781)	OXGR1 (+141879)	POFUT2 (-17412)
unnamed	CCND1 (-245167)	LRRK1 (-18732)	STK24 (-50223)	FTCD (+2281)
unnamed	CCND1 (-222430)	LRRK1 (+128855)	CLYBL (+125402)	LSS (+8750)
unnamed	CCND1 (-191792)	SNRPA1 (-84632)	CLYBL (+137127)	S100B (+45471)
unnamed	FGF19 (-13803)	WFIKKN1 (-3457)	ZIC5 (+45538)	CECR1 (-40309)
unnamed	FGF19 (-24015)	TMEM204 (-986)	SLC10A2 (-799517)	GNB1L (-25638)
unnamed	FGF3 (-46921)	NTHL1 (-43758)	COL4A1 (+212221)	P2RX6 (+7747)
unnamed	FGF3 (-56233)	ZSCAN10 (+411)	SOX1 (-212313)	PPM1F (+26221)
unnamed	ANO1 (+21605)	VASN (+10514)	HOMEZ (+48201)	AP1B1 (+18547)
unnamed	CTTN (+160078)	TMEM114 (+1976)	GZMB (-59627)	GAL3ST1 (-8968)
unnamed	CTTN (+305541)	EMP2 (+1780)	NOVA1 (+764397)	SMTN (+17533)
unnamed	ARAP1 (+12048)	RMI2 (-30850)	FOXG1 (-283037)	MB (-3810)
unnamed	FCHSD2 (-27532)	MKL2 (+228480)	ARHGAP5 (-183707)	MYH9 (+56213)
unnamed	P2RY2 (+11394)	KDM8 (-137108)	AKAP6 (-74154)	CARD10 (+10686)
unnamed	P2RY2 (+19431)	IL21R (+92)	EGLN3 (+485012)	CARD10 (+7161)
unnamed	P2RY6 (-14059)	SPN (+1970)	EGLN3 (+408174)	SH3BP1 (-5282)
unnamed	RELT (+22791)	ENSG00000270466 (+363)	GCH1 (+84020)	KCNJ4 (+32030)
unnamed	SLCO2B1 (+24756)	FBXL19 (-13833)	LGALS3 (-25937)	RPL3 (+27088)
unnamed	WNT11 (+4363)	MYLK3 (-104)	TBPL2 (-13991)	MEI1 (-1303)
unnamed	WNT11 (-49424)	ADCY7 (+273)	OTX2 (+15599)	WBP2NL (+8)
unnamed	WNT11 (-71212)	IRX3 (-25)	OTX2 (+12174)	PACSIN2 (+54826)
unnamed	WNT11 (-85774)	IRX5 (+3251)	RTN1 (-94454)	PPARA (-38436)
unnamed	LRRC32 (+91656)	NLRC5 (-135)	PPM1A (+85705)	BRD1 (+164964)
unnamed	LRRC32 (-7269)	GPR114 (-7626)	MAX (-71962)	GHRL (+8043)
unnamed	TENM4 (+380595)	CCDC135 (+3688)	MAX (-153250)	SLC6A6 (+108299)
unnamed	TENM4 (-227493)	KIFC3 (+27512)	FUT8 (+435503)	EPM2AIP1 (+23207)
unnamed	RAB30 (+50958)	PLEKHG4 (+1775)	ZFP36L1 (+87857)	VILL (+6200)
unnamed	MMP20 (+9438)	HSD11B2 (-2332)	ZFP36L1 (+12019)	TREX1 (+259)
unnamed	ZBTB16 (+32173)	CDH3 (-701)	ZFP36L1 (-31706)	TMEM115 (-5609)
unnamed	NNMT (-60165)	ZFHX3 (-10926)	ACTN1 (+17043)	MUSTN1 (+222)
unnamed	TMPRSS4 (+6446)	ZFHX3 (-97014)	VSX2 (-20850)	MUSTN1 (-17715)
unnamed	CXCR5 (-13475)	BCAR1 (+14567)	SYNDIG1L (+23655)	ARHGEF3 (+102848)
unnamed	POU2F3 (-39224)	PKD1L2 (+50)	LTBP2 (+40221)	FAM3D (+42937)
unnamed	GRIK4 (+12357)	BCMO1 (+297)	EIF2B2 (-22876)	MAGI1 (+486333)
unnamed	GRIK4 (+199507)	GINS2 (+26830)	JDP2 (+21126)	NR1I2 (+27406)
unnamed	TBCEL (-247530)	FOXC2 (+181)	JDP2 (+24401)	SEC22A (-54219)
unnamed	FEZ1 (+125068)	BANP (-12024)	TGFB3 (+69346)	ABTB1 (+49755)
unnamed	ETS1 (+252112)	DPEP1 (-5925)	GPATCH2L (-34216)	EFCC1 (-1284)
unnamed	FLI1 (+24748)	TIMM22 (+38981)	ADCK1 (+180449)	ZIC1 (+533042)
unnamed	NFRKB (+31004)	SCARF1 (+741)	NRXN3 (-206793)	VEPH1 (-39697)
unnamed	ST14 (+57281)	SERPINF1 (+1197)	DIO2 (+696755)	LRRC15 (-1651)
unnamed	ADAMTS8 (+45113)	SPEM1 (-966)	DIO2 (+502180)	XXYLT1 (+118996)
unnamed	C11orf44 (-93501)	HS3ST3A1 (+306)	DIO2 (+481093)	MUC4 (+448)
unnamed	C11orf44 (-71963)	HS3ST3B1 (+25)	STON2 (+61873)	ATP5I (+10464)
unnamed	C11orf44 (+46874)	B9D1 (+31626)	RIN3 (+89045)	DGKQ (+5706)
unnamed	C11orf44 (+53687)	SLC47A1 (+183)	LGMN (+111199)	FGFRL1 (+4821)
unnamed	C11orf44 (+89012)	FOXN1 (+1379)	ITPK1 (+70335)	FGFRL1 (+22571)
unnamed	B4GALNT3 (+49733)	CRYBA1 (-506)	PRIMA1 (+41752)	NAT8L (+13486)
unnamed	NINJ2 (+35820)	CCL2 (-204)	GLRX5 (+63483)	NAT8L (+25049)
unnamed	FBXL14 (+75156)	CSF3 (-172)	C14orf132 (-11611)	NAT8L (+33161)
unnamed	FBXL14 (+70456)	TNS4 (+849)	BCL11B (+990227)	RGS12 (-73986)
unnamed	FBXL14 (+33693)	JUP (+11550)	BCL11B (+565765)	RGS12 (-9111)
unnamed	FBXL14 (-11382)	DNAJC7 (-10142)	BCL11B (+364140)	DOK7 (+16925)
unnamed	FKBP4 (-253931)	STAT5A (+498)	EML1 (+95908)	DOK7 (+30287)
unnamed	CCND2 (-72750)	NAGLU (-16252)	WARS (-41771)	TADA2B (-49955)
unnamed	FGF6 (-5570)	SOST (-269)	WARS (-49408)	HTRA3 (+246)
unnamed	KCNA5 (+6328)	WNT3 (-649)	BEGAIN (-76618)	NSUN7 (+138699)
unnamed	KCNA5 (+55715)	MYL4 (+647)	ENSG00000269375 (+236160)	SGCB (+823)
unnamed	NTF3 (+23821)	TTLL6 (-512)	ENSG00000269375 (+258860)	MANBA (-74)
unnamed	NTF3 (+49059)	NGFR (+1108)	ENSG00000269375 (+284173)	BDH2 (+852)
unnamed	NTF3 (+92534)	DLX4 (+3125)	ENSG00000269375 (+292848)	TACR3 (+60)
unnamed	VWF (+40141)	PDK2 (+6636)	ENSG00000269375 (+300623)	ETNPPL (+109)
unnamed	VWF (+9041)	PPP1R9B (+26527)	DIO3 (-196363)	FGF2 (+425)
unnamed	CD9 (-5893)	COL1A1 (-4370)	PPP2R5C (-5385)	INTU (-8462)
unnamed	SCNN1A (+4365)	TMEM92 (-5992)	RCOR1 (-7073)	MAB21L2 (+1348)
unnamed	DENND5B (+17443)	ACSF2 (+181)	TRAF3 (-27175)	SFRP2 (+122)
unnamed	RAPGEF3 (-6997)	MYCBPAP (+10355)	AHNAK2 (+10719)	CEP44 (-163367)
unnamed	TMEM106C (-14265)	SPAG9 (+63588)	NDN (-3575)	STOX2 (+80729)
unnamed	TMEM106C (-9078)	USP32 (-29805)	NDN (-74750)	IRF2 (+126534)
unnamed	OR10AD1 (+4432)	BRIP1 (+82)	NDN (-170388)	LRP2BP (+8077)
unnamed	ANKRD33 (-73169)	GPRC5C (+1111)	APBA2 (+15280)	PDLIM3 (+949)
unnamed	ANKRD33 (-45531)	CDK3 (-431)	APBA2 (+146393)	CYP4V2 (+12826)
unnamed	ANKRD33 (+8094)	ENSG00000178404 (+28058)	NDNL2 (+43220)	MTNR1A (+683)
unnamed	C12orf44 (+17408)	SLC38A10 (+9505)	CHRNA7 (+68147)	BRD9 (-19736)
unnamed	KRT80 (+27484)	CD7 (+1665)	GJD2 (+45978)	IRX1 (+5357)
unnamed	TENC1 (+23055)	METRNL (+4258)	CHP1 (+10209)	PAPD7 (+51670)
unnamed	OR10P1 (+9806)	LPIN2 (-17018)	AP4E1 (+168730)	MARCH6 (+20209)
unnamed	HMGA2 (-94836)	SOGA2 (+66094)	UNC13C (-94476)	DAP (+105909)
unnamed	FRS2 (-54416)	SOGA2 (+82744)	FOXB1 (-9883)	PDZD2 (+115683)
unnamed	TSPAN8 (-27822)	GREB1L (-120604)	TLN2 (+217186)	SPEF2 (+179)
unnamed	ALX1 (-6447)	GATA6 (+1434)	TPM1 (-42421)	SEPP1 (+54893)
unnamed	NEDD1 (+252494)	LAMA3 (-39082)	TPM1 (-28896)	ITGA2 (+532)
unnamed	CHST11 (+37174)	PSTPIP2 (+601)	SPG21 (+10486)	PDE8B (-118)
unnamed	RFX4 (-6515)	PMAIP1 (-55)	SMAD6 (+27459)	SLC25A48 (+59)
unnamed	RFX4 (+71785)	MBP (+149312)	SMAD6 (+133109)	EIF4EBP3 (+12)
unnamed	BTBD11 (+30635)	NFATC1 (-261)	PIAS1 (-107617)	ARAP3 (+8688)
unnamed	TMEM119 (-14588)	WDR18 (-1618)	PAQR5 (-20467)	ADRB2 (-206)
unnamed	TBX3 (-219593)	ATP8B3 (+5175)	TLE3 (+303390)	NDST1 (+4089)
unnamed	MED13L (+772618)	TLE6 (+10081)	TLE3 (+26027)	SYNPO (+183)
unnamed	TESC (+37311)	SLC44A2 (-734)	SCAPER (+81063)	MYOZ3 (-31)
unnamed	NOS1 (-77221)	CNN1 (+856)	WDR61 (-19827)	MYOZ3 (+11094)
unnamed	SUDS3 (+234440)	ACP5 (+681)	FAH (+81116)	TNIP1 (-4878)
unnamed	KDM2B (-9136)	PRKACA (+4293)	MEX3B (+134232)	SPARC (-10987)
unnamed	SNRNP35 (+29705)	LRRC25 (+627)	MEX3B (-12306)	FAXDC2 (+328)
unnamed	TMEM132C (+46790)	NDUFA13 (-52934)	AGBL1 (-79152)	PANK3 (-264908)
unnamed	TMEM132C (+58927)	CAPN12 (+23176)	NTRK3 (+683323)	SCGB3A1 (-27535)
unnamed	TMEM132C (+70827)	LTBP4 (+16922)	NTRK3 (+533111)	SLC35B3 (+106316)
unnamed	TMEM132C (+107477)	CKM (-590)	DET1 (-26704)	BTN2A2 (+434)
unnamed	TMEM132C (+214177)	DACT3 (+7007)	ZNF710 (+44014)	DDR1 (+6377)
unnamed	FZD10 (+63496)	NTN5 (-424)	SLCO3A1 (-231475)	DPCR1 (+14564)
unnamed	MUC8 (+67338)	LIM2 (-1316)	SLCO3A1 (+158313)	LEMD2 (+9513)
unnamed	CRYL1 (+119983)	HAS1 (-354)	RGMA (-107533)	TEAD3 (+3553)
unnamed	TNFRSF19 (+124926)	TTYH1 (+11063)	RGMA (-162471)	FGD2 (+13652)
unnamed	MIPEP (+22158)	FAM150B (-27667)	RGMA (-171046)	GLP1R (+26)
unnamed	ATP12A (-9386)	GREB1 (-17892)	RGMA (-385121)	MDFI (+7103)
unnamed	SHISA2 (+166869)	GREB1 (+8221)	MCTP2 (+25993)	GUCA1A (-12934)
unnamed	SHISA2 (+77094)	GREB1 (+20846)	NR2F2 (+78742)	CRIP3 (+35)
unnamed	KATNAL1 (+164671)	GREB1 (+25258)	ARRDC4 (-231840)	MRPL14 (-6444)
unnamed	KL (-177596)	GREB1 (+48358)	IGF1R (+69288)	CRISP2 (-76)
unnamed	SMAD9 (+32271)	MATN3 (+42)	IGF1R (+79213)	DST (+100756)
unnamed	FOXO1 (+310596)	SDC1 (+54881)	IGF1R (+137225)	AIM1 (+28045)
unnamed	RCBTB2 (-9381)	MFSD2B (+6849)	MEF2A (-79017)	HEY2 (-1376)
unnamed	DLEU1 (+304581)	DRC1 (+61166)	LYSMD4 (-261662)	RMND1 (-42141)
unnamed	DACH1 (+492330)	LTBP1 (-107726)	LRRK1 (+88793)	SYNE1 (+256334)
unnamed	TM9SF2 (-68383)	LTBP1 (-19401)	CHSY1 (+123987)	SYTL3 (+2287)
unnamed	CLYBL (+19127)	LTBP1 (+761)	CHSY1 (-6401)	C6orf70 (+40467)
unnamed	CLYBL (+125115)	CRIM1 (+12731)	SSTR5 (-41656)	C6orf70 (+49417)
unnamed	CLYBL (+130352)	ATL2 (-53396)	PKD1 (-4664)	SUN1 (+9962)
unnamed	ZIC5 (+68813)	ZFP36L2 (+181710)	TFAP4 (-20637)	GPR146 (-1233)
unnamed	METTL21C (-6646)	SIX3 (+10673)	PPL (-6852)	GPR146 (+5117)
unnamed	COL4A1 (+8121)	SIX2 (+56)	METTL22 (+40018)	GPER (-3505)
unnamed	COL4A2 (+17711)	SIX2 (-160506)	ABAT (-44601)	UNCX (+36107)
unnamed	COL4A2 (+32424)	BCL11A (+201020)	USP7 (-182359)	ELFN1 (+7058)
unnamed	COL4A2 (+82549)	EHBP1 (-33101)	RMI2 (-16688)	LFNG (-46963)
unnamed	ARHGEF7 (-193949)	MEIS1 (+9906)	ENSG00000188897 (+16731)	PAPOLB (+25)
unnamed	TUBGCP3 (-30594)	MEIS1 (+140818)	MKL2 (+246805)	CHN2 (-47990)
unnamed	CEBPE (+5125)	ASPRV1 (+1834)	KIAA0430 (+92248)	CRHR2 (+17856)
unnamed	ARHGAP5 (-183757)	ATP6V1B1 (+1576)	XYLT1 (+358675)	GHRHR (-25350)
unnamed	AKAP6 (-74229)	ATP6V1B1 (+6938)	RBBP6 (-27828)	AEBP1 (+7340)
unnamed	PSMA6 (+42925)	NAGK (-3843)	KIAA0556 (+87077)	VOPP1 (+1280)
unnamed	NFKBIA (+53014)	SFXN5 (-8648)	KIAA0556 (+156765)	WBSCR17 (-402930)
unnamed	NFKBIA (-9048)	ACTG2 (+2078)	GSG1L (-29058)	COL1A2 (-60)
unnamed	FOXA1 (+10676)	M1AP (-136)	ZNF423 (+66612)	PON2 (+885)
unnamed	DDHD1 (-202184)	KANSL3 (-30917)	ZNF423 (+54775)	LRRC17 (+20925)
unnamed	BMP4 (+10191)	IL1R2 (+73069)	ZNF423 (-87963)	AASS (-10087)
unnamed	BMP4 (-6759)	SULT1C2 (+555)	TOX3 (-207493)	HILPDA (+18)
unnamed	CDKN3 (-138773)	MALL (+493)	NLRC5 (+95140)	CPA1 (+288)
unnamed	CDKN3 (-52698)	NT5DC4 (+2725)	CNGB1 (+24566)	KLF14 (+63)
unnamed	CDKN3 (-30160)	PSD4 (+490)	C16orf80 (+42179)	TAS2R60 (-6571)
unnamed	TBPL2 (-13879)	PAX8 (+29777)	C16orf80 (+30066)	ZNF467 (-10107)
unnamed	OTX2 (+15712)	EN1 (+12779)	CMTM4 (+45510)	ZNF862 (+11919)
unnamed	OTX2 (+12062)	EN1 (-3484)	CDH16 (+18824)	ZNF775 (+3801)
unnamed	PPM1A (+85830)	TMEM37 (+43955)	FAM65A (-8180)	ATG9B (+14861)
unnamed	SIX1 (+11755)	ENSG00000163075 (+416)	HYDIN (+192804)	ARHGEF10 (+57121)
unnamed	TRMT5 (-122299)	BIN1 (+40868)	ZFHX3 (+13299)	ARHGEF10 (+74933)
unnamed	TRMT5 (-129112)	LYPD6B (+37707)	ZFHX3 (-19026)	MYOM2 (+100008)
unnamed	TMEM30B (+128170)	GALNT5 (+628)	ZFHX3 (-239301)	GFRA2 (+372)
unnamed	PPP1R36 (+75955)	WDSUB1 (+149728)	ZFHX3 (-250889)	SORBS3 (+9955)
unnamed	PLEKHG3 (-29841)	WDSUB1 (+61515)	ZFHX3 (-270776)	ENSG00000248235 (+76)
unnamed	MAX (-72075)	PLEKHA3 (+42968)	ZFHX3 (-306901)	KIAA1967 (+23518)
unnamed	PLEK2 (-45783)	CASP10 (-24741)	ZFHX3 (-385076)	TMEM66 (+345123)
unnamed	PLEKHH1 (+3007)	TNS1 (+89113)	ZFHX3 (-456876)	SMIM18 (-76892)
unnamed	ZFP36L1 (+298119)	TNS1 (+29526)	ZFHX3 (-566226)	STAR (-455)
unnamed	ZFP36L1 (+266257)	GPBAR1 (-338)	MLKL (-33738)	FGFR1 (+36700)
unnamed	ZFP36L1 (+155007)	TMBIM1 (-44516)	CFDP1 (+55908)	CEBPD (+78660)
unnamed	ZFP36L1 (+89019)	VIL1 (+3673)	TMEM170A (+4558)	CLVS1 (-233614)
unnamed	ZFP36L1 (+34269)	OBSL1 (+9448)	ADAMTS18 (-120952)	TRPA1 (+52)
unnamed	ACTN1 (+50668)	PAX3 (-38)	VAT1L (+16586)	CA13 (+107)
unnamed	ACTN1 (-25632)	SP110 (-335)	CLEC3A (-101324)	CDH17 (+43402)
unnamed	ACTN1 (-65794)	TIGD1 (-23612)	CLEC3A (-74412)	BAALC (+12287)
unnamed	KIAA0247 (-5388)	EFHD1 (+812)	MAF (+643186)	DCSTAMP (+7071)
unnamed	PSEN1 (+6808)	EFHD1 (+16112)	MAF (+476811)	AARD (+275)
unnamed	LTBP2 (+41071)	AGAP1 (-169088)	CMIP (-60787)	AGO2 (-68707)
unnamed	LTBP2 (-24291)	GBX2 (-41638)	CMIP (-12712)	RHPN1 (-569)
unnamed	DLST (-5633)	FAM132B (-28424)	CMIP (+57400)	DGAT1 (+13148)
unnamed	PGF (-22113)	HES6 (-21560)	HSD17B2 (+10126)	TMEM249 (+499)
unnamed	EIF2B2 (-17939)	TWIST2 (-98)	KCNG4 (-21234)	CD72 (+1926)
unnamed	FBLN5 (+22092)	TWIST2 (+230277)	KIAA0513 (+124082)	PAX5 (+31615)
unnamed	RIN3 (-13068)	HDAC4 (+244655)	FOXF1 (-131933)	GRHPR (+7900)
unnamed	RIN3 (+89820)	AGXT (+579)	KLHDC4 (-39745)	SLC28A3 (+61723)
unnamed	PRIMA1 (+41977)	AGXT (+24842)	SLC7A5 (+47556)	IPPK (+61197)
unnamed	PRIMA1 (+26202)	ENSG00000226321 (+7989)	BANP (+225051)	NINJ1 (+270)
unnamed	ASB2 (+78499)	SNED1 (-34980)	PABPN1L (-4312)	FBP1 (+606)
unnamed	ASB2 (-9488)	MTERFD2 (+37734)	CBFA2T3 (-12201)	PTCH1 (+59868)
unnamed	IFI27L2 (-9712)	ANGPT4 (-240)	NXN (+44185)	ANKS6 (+4908)
unnamed	GSC (-117988)	RSPO4 (-109)	HIC1 (+81671)	HSDL2 (-392)
unnamed	ENSG00000269375 (+258235)	TGM3 (+716)	SGSM2 (+10544)	RGS3 (+120502)
unnamed	ENSG00000269375 (+283510)	ENSG00000088899 (-6)	OR1D5 (+132013)	DFNB31 (+3537)
unnamed	ENSG00000269375 (+290935)	JAG1 (+24619)	ITGAE (+29899)	PAPPA-AS1 (+78747)
unnamed	ENSG00000269375 (+303598)	NKX2-4 (+1253)	GGT6 (-16150)	DAB2IP (+851)
unnamed	DIO3 (-195275)	FOXA2 (+6688)	WSCD1 (+169724)	DAB2IP (+11226)
unnamed	DIO3 (-159125)	FOXA2 (+38)	AIPL1 (+179017)	PTGS1 (+5079)
unnamed	DIO3 (-86175)	FOXS1 (+2795)	TEKT1 (-62133)	NR5A1 (-5929)
unnamed	CDC42BPB (+42899)	EMILIN3 (+279)	NTN1 (+32979)	SLC2A8 (-9708)
unnamed	CDC42BPB (+37761)	JPH2 (-132)	NTN1 (+94954)	AK1 (-7328)
unnamed	NDN (-3350)	R3HDML (+19112)	NTN1 (+174491)	PHYHD1 (+701)
unnamed	TJP1 (-49357)	SDC4 (+3626)	STX8 (+219540)	PTGES (-49)
unnamed	TJP1 (-67494)	SULF2 (+27855)	STX8 (+205578)	ASS1 (+6426)
unnamed	TJP1 (-98382)	SNAI1 (+59977)	ADORA2B (+22157)	PPAPDC3 (-12168)
unnamed	TJP1 (-102569)	PTPN1 (+85659)	B9D1 (+45151)	GBGT1 (+10694)
unnamed	EHD4 (+21701)	PARD6B (-40668)	SPECC1 (+8640)	COL5A1 (-96120)
unnamed	C15orf48 (+25470)	BMP7 (+54446)	KCNJ12 (-5009)	QSOX2 (-17638)
unnamed	AP4E1 (+169118)	SPO11 (+110)	KCNJ12 (+21654)	CARD9 (+408)
unnamed	TMOD3 (+8323)	CTCFL (+1063)	NOS2 (-5413)	GPR143 (+291)
unnamed	ONECUT1 (-5129)	ZBP1 (+9916)	CRYBA1 (-5493)	TRAPPC2 (+16344)
unnamed	ONECUT1 (-90079)	STX16 (-60189)	CCL2 (-326454)	OFD1 (+30211)
unnamed	PYGO1 (-71243)	NPEPL1 (+24619)	TMEM132E (+139557)	PRICKLE3 (+695)
unnamed	PRTG (+47177)	GNAS (+2319)	SRCIN1 (+17370)	CCNB3 (-28)
unnamed	PRTG (-25336)	EDN3 (+63181)	HAP1 (-3917)	CCNB3 (+244109)
unnamed	PRTG (-42711)	CABLES2 (-21447)	PTRF (-5178)	IQSEC2 (+35322)
unnamed	CGNL1 (+51272)	GATA5 (-149)	PYY (+9712)	AR (+710)
unnamed	CGNL1 (+100410)	GATA5 (-98187)	FZD2 (-8687)	STARD8 (+46115)
unnamed	GCOM1 (-87768)	TCFL5 (+440)	CRHR1 (-13161)	XKRX (-140)
unnamed	ALDH1A2 (+149266)	SLC17A9 (+1911)	WNT3 (+41088)	BEX4 (+530)
unnamed	FOXB1 (+123567)	NKAIN4 (+7667)	DLX4 (-37263)	LHFPL1 (+44)
unnamed	RORA (-192988)	TNFRSF6B (-9233)	DLX4 (-24613)	HTR2C (+412)
unnamed	RORA (-347663)	CYYR1 (+840)	XYLT2 (-17253)	ENSG00000134602 (+682)
unnamed	TPM1 (-28684)	SLC5A3 (+5)	TOB1 (-38132)	MTM1 (-1194)
unnamed	HERC1 (-60476)	RUNX1 (+160528)	ENSG00000166329 (+101485)	GPR50 (+175)
unnamed	KBTBD13 (+8771)	ERG (+605)	MRPS23 (+26504)	PNMA5 (+11)
unnamed	SMAD6 (-44378)	PSMG1 (+175389)	MRPS23 (-11708)	ATP2B3 (-4692)
unnamed	SMAD6 (+27409)	BACE2 (+372)	VEZF1 (+41250)	TKTL1 (+33189)
unnamed	SMAD6 (+33947)	RIPK4 (+84528)	SCN4A (-16772)
unnamed	SMAD6 (+162084)	C2CD2 (+27249)	RGS9 (+36196)
unnamed	SMAD3 (-104983)	TFF3 (+14198)	PRKCA (+72319)
unnamed	SMAD3 (+67317)	UBE2G2 (+28571)	PRKCA (+190106)
unnamed	PIAS1 (-108992)	PTTG1IP (-15261)	CACNG1 (+23832)
unnamed	ITGA11 (-38433)	POFUT2 (-17087)	CPSF4L (-5431)
unnamed	ITGA11 (-53308)	SLC19A1 (+35322)	MXRA7 (+9849)
unnamed	C15orf27 (+83285)	FTCD (+16906)	MGAT5B (+12846)
unnamed	C15orf27 (+125672)	FTCD (+981)	CYTH1 (+22801)
unnamed	CRABP1 (-20003)	GNB1L (-22851)	CHMP6 (-64716)
unnamed	FAH (+80266)	TXNRD2 (-18642)	CSNK1D (-9756)
unnamed	MESDC2 (+77469)	ARVCF (+24706)	TBCD (+41960)
unnamed	BNC1 (-21359)	SCARF2 (+383)	ZNF750 (+3479)
unnamed	ISG20 (+78664)	LZTR1 (-6152)	ZNF750 (-34971)
unnamed	ANPEP (+5581)	ADORA2A (-7205)	B3GNTL1 (+14723)
unnamed	ZNF710 (+33826)	KREMEN1 (-41806)	METRNL (+8133)
unnamed	ZNF710 (+42026)	INPP5J (+3708)	METRNL (+20271)
unnamed	ST8SIA2 (+19830)	PLA2G3 (-295)	LAMA1 (-131087)
unnamed	FAM174B (+45725)	MB (-4147)	LAMA1 (-206150)
unnamed	RGMA (-162458)	MYH9 (+57525)	PTPRM (+18495)
unnamed	RGMA (-172608)	MYH9 (+21450)	APCDD1 (-12350)
unnamed	MCTP2 (+25793)	TXN2 (+25039)	TUBB6 (-20145)
unnamed	NR2F2 (-425696)	PVALB (+2548)	FAM210A (+156184)
unnamed	NR2F2 (+68954)	C1QTNF6 (+10766)	TMEM241 (+41544)
unnamed	NR2F2 (+79067)	RAC2 (+1547)	OSBPL1A (+37723)
unnamed	IGF1R (-124875)	CARD10 (+8799)	CHST9 (-392182)
unnamed	IGF1R (-48562)	CDC42EP1 (-8354)	CDH2 (+46847)
unnamed	IGF1R (+20525)	CDC42EP1 (+1321)	CDH2 (+5460)
unnamed	IGF1R (+67775)	SH3BP1 (-3194)	NONE
unnamed	IGF1R (+79725)	PDGFB (+7656)	RNF165 (+39626)
unnamed	IGF1R (+137863)	RPL3 (+27163)	ZBTB7C (+64924)
unnamed	PGPEP1L (+121503)	MEI1 (-1240)	ZBTB7C (-36651)
unnamed	ALDH1A3 (-113993)	WBP2NL (+108)	CTIF (-86229)
unnamed	ALDH1A3 (-107106)	PACSIN2 (+54338)	CTIF (+74809)
unnamed	ALDH1A3 (-48456)	PPARA (-39499)	LIPG (+10537)
unnamed	CHSY1 (+113037)	BHLHE40 (-147376)	MAPK4 (-36323)
unnamed	PCSK6 (+81598)	GHRL (+4243)	ENSG00000267699 (+24661)
unnamed	PCSK6 (+36448)	SEC13 (-16213)	SMAD4 (-12695)
unnamed	PCSK6 (-6902)	HDAC11 (+26185)	MEX3C (-127323)
unnamed	GNG13 (-73730)	FBLN2 (+1569)	C18orf54 (+121383)
unnamed	CREBBP (+7214)	TRIM71 (+1553)	ALPK2 (+225576)
unnamed	ADCY9 (+104111)	EPM2AIP1 (+23220)	ALPK2 (+72151)
unnamed	TFAP4 (-19824)	RTP3 (-12418)	MALT1 (+83532)
unnamed	GLIS2 (-16424)	MYL3 (-1831)	CDH20 (-24840)
unnamed	PPL (+17986)	PTPN23 (+24490)	CDH20 (+248198)
unnamed	PPL (-6639)	TREX1 (+21)	RNF152 (-55571)
unnamed	SOCS1 (+177611)	COL7A1 (-375)	BCL2 (+164511)
unnamed	SOCS1 (+161661)	TMEM115 (-5347)	BCL2 (+111798)
unnamed	RMI2 (-19038)	TLR9 (+1141)	SMIM21 (+35420)
unnamed	RMI2 (+27325)	BAP1 (+28741)	SMIM21 (-122755)
unnamed	ENSG00000188897 (+16806)	STAB1 (-10904)	ZNF516 (+518433)
unnamed	ENSG00000188897 (+6931)	ITIH3 (-1176)	ZNF516 (-44354)
unnamed	ENSG00000188897 (-3681)	MUSTN1 (+1310)	GALR1 (+649658)
unnamed	MKL2 (-65007)	PRKCD (+3427)	GALR1 (+661395)
unnamed	PARN (+134024)	TKT (+12488)	SALL3 (-686362)
unnamed	XYLT1 (+364788)	ACOX2 (-492)	SALL3 (-616900)
unnamed	MYLK3 (+5121)	FAM19A4 (+498)	SALL3 (-452000)
unnamed	ZNF423 (+221037)	DPPA4 (+181)	SALL3 (-340137)
unnamed	ZNF423 (-88013)	NR1I2 (+28706)	SALL3 (-249462)
unnamed	ADCY7 (-4977)	SEC22A (-55144)	SALL3 (-150587)
unnamed	ADCY7 (+6373)	KALRN (+173860)	KCNG2 (-6780)
unnamed	BRD7 (-33785)	DNAJB8 (+127886)	VAV1 (+28951)
unnamed	BRD7 (-79385)	DNAJB8 (+110048)	ANGPTL4 (-11197)
unnamed	IRX3 (+42525)	GATA2 (+5940)	BRD4 (+3637)
unnamed	IRX3 (+8975)	SLCO2A1 (-29180)	JUND (-12206)
unnamed	IRX3 (-58588)	FOXL2 (+232)	CRTC1 (-34925)
unnamed	IRX3 (-75363)	ACPL2 (+28743)	UQCRFS1 (+769985)
unnamed	IRX3 (-83725)	ZBTB38 (-19954)	ZNF536 (-136544)
unnamed	IRX3 (-124163)	ZIC4 (+19208)	ZNF536 (+279694)
unnamed	IRX3 (-145213)	VEPH1 (-39847)	CEBPG (+46039)
unnamed	IRX3 (-169113)	LRRC15 (-4114)	PEPD (-11575)
unnamed	IRX3 (-291213)	XXYLT1 (+191646)	CHST8 (+40729)
unnamed	IRX3 (-299300)	XXYLT1 (+63458)	ACTN4 (+37303)
unnamed	IRX5 (-275699)	MUC4 (-23140)	NCCRP1 (-33888)
unnamed	IRX5 (+54264)	PDE6B (+1730)	FOSB (-11828)
unnamed	GNAO1 (+77725)	ATP5I (+22514)	EMP3 (+15406)
unnamed	GNAO1 (+93950)	MFSD7 (+155)	KLK15 (-4621)
unnamed	NLRC5 (+94928)	CRIPAK (-10940)	SBK2 (+9768)
unnamed	CCL17 (+6934)	NAT8L (+24724)	ENSG00000231274 (-4554)
unnamed	CNGB1 (+24703)	ENSG00000168824 (+30658)	ZIM2 (-26078)
unnamed	MMP15 (+37955)	MSX1 (+2707)	PXDN (+14603)
unnamed	CDH5 (+10392)	SH3TC1 (+14169)	MYT1L (-438837)
unnamed	BEAN1 (+6550)	TRMT44 (+31875)	ASAP2 (-27469)
unnamed	CDH16 (+16412)	HMX1 (+13118)	YWHAQ (-45443)
unnamed	SMPD3 (+64666)	SOD3 (+303)	RRM2 (+81795)
unnamed	SMPD3 (+52341)	SHISA3 (+1032)	HPCAL1 (-84288)
unnamed	CDH3 (+12961)	LNX1 (-742)	LPIN1 (+279354)
unnamed	FUK (-23436)	NMU (-623)	TRIB2 (-162427)
unnamed	VAC14 (-209761)	NKX6-1 (+503)	RDH14 (+260396)
unnamed	ZFHX3 (+101036)	PITX2 (+2384)	SDC1 (+76094)
unnamed	ZFHX3 (+28811)	PITX2 (-14929)	SDC1 (+55794)
unnamed	ZFHX3 (+24424)	FGF2 (+512)	RHOB (+40778)
unnamed	ZFHX3 (+12799)	HHIP (+102)	POMC (-9116)
unnamed	ZFHX3 (+5149)	EDNRA (+191)	RASGRP3 (-97257)
unnamed	ZFHX3 (-255264)	MAB21L2 (-2352)	THUMPD2 (-72393)
unnamed	ZFHX3 (-355301)	MAB21L2 (+1298)	PKDCC (-206635)
unnamed	ZFHX3 (-385114)	DDX60 (-155)	PKDCC (-168747)
unnamed	MLKL (-29051)	TENM3 (-100619)	ZFP36L2 (+14073)
unnamed	FA2H (+31848)	DCTD (-181418)	SIX2 (-248644)
unnamed	CFDP1 (+57483)	CLDN22 (+80127)	RHOQ (+12721)
unnamed	VAT1L (+54973)	MTNR1A (+721)	CALM2 (-73310)
unnamed	VAT1L (+106911)	NKD2 (-2744)	SPTBN1 (-75522)
unnamed	MAF (+300836)	IRX4 (+5644)	TMEM17 (-64624)
unnamed	CMIP (-12650)	IRX2 (+10538)	SPRED2 (-358152)
unnamed	CMIP (+10525)	C5orf38 (+1063)	MEIS1 (+147081)
unnamed	CMIP (+13125)	IRX1 (+707)	PLEK (+3708)
unnamed	CMIP (+126300)	FAM105B (-177032)	BOLA3 (+40783)
unnamed	PLCG2 (+85837)	LIFR (+127468)	ATOH8 (-10167)
unnamed	HSD17B2 (+10126)	SEPP1 (+54931)	CHMP3 (+16945)
unnamed	HSBP1 (+36527)	IL6ST (-284342)	SMYD1 (-64499)
unnamed	ATP2C2 (-8545)	OCLN (+881)	ARID5A (+17714)
unnamed	COTL1 (+17720)	FOXD1 (+109839)	FAHD2B (+109651)
unnamed	ZDHHC7 (+87733)	FOXD1 (+66964)	CNGA3 (-65543)
unnamed	KIAA0513 (+124145)	FOXD1 (-2923)	RNF149 (-21930)
unnamed	IRF8 (+84791)	FAM169A (+100)	DPP10 (+133959)
unnamed	IRF8 (+295879)	OTP (-300)	DDX18 (-210538)
unnamed	FOXF1 (-214208)	THBS4 (+42)	DDX18 (-122551)
unnamed	FOXL1 (+300010)	SLC22A5 (+18144)	INSIG2 (+167563)
unnamed	FBXO31 (+396488)	TGFBI (+28841)	C1QL2 (+39002)
unnamed	FBXO31 (+72800)	ECSCR (+1490)	INHBB (-8406)
unnamed	BANP (+225226)	TMEM173 (+937)	INHBB (+50731)
unnamed	ZNF469 (-21029)	EIF4EBP3 (+187)	GLI2 (+226290)
unnamed	ZFPM1 (+45913)	ARAP3 (+9438)	BIN1 (+25418)
unnamed	NXN (+98010)	SH3RF2 (+135)	HS6ST1 (+12501)
unnamed	NXN (+42572)	ADRB2 (-181)	RAB6C (-212447)
unnamed	NXN (+27860)	IL17B (-3824)	NCKAP5 (-143032)
unnamed	OR1D5 (+103588)	IL17B (-36299)	MGAT5 (+85522)
unnamed	ITGAE (+30424)	CD74 (+1089)	CXCR4 (-129100)
unnamed	GGT6 (-15812)	SYNPO (-2879)	RND3 (+395843)
unnamed	NTN1 (+33029)	MYOZ3 (+11369)	TNFAIP6 (-18118)
unnamed	NTN1 (+94766)	FAXDC2 (+328)	PRPF40A (-329455)
unnamed	NTN1 (+128666)	EBF1 (-1181)	ITGA6 (-142354)
unnamed	NTN1 (+174079)	PANK3 (-266420)	SP3 (-87158)
unnamed	ELAC2 (-116859)	SLIT3 (+1358)	NONE
unnamed	TVP23C (+72745)	KCNMB1 (+34681)	HOXD10 (-251894), HOXD11 (-242601), HOXD12 (-235045), HOXD13 (-228206), KIAA1715 (+137660), EVX2 (+219228)
unnamed	MPRIP (-20911)	KCNIP1 (-19727)	MTX2 (+222291)
unnamed	PLD6 (+73491)	FBXW11 (-57606)	TTC30A (-144394)
unnamed	B9D1 (+44713)	MSX2 (-711)	DNAJC10 (-87174)
unnamed	SLC47A1 (+4033)	PHYKPL (+8836)	NABP1 (+28417)
unnamed	LGALS9B (+181985)	PHYKPL (-116639)	SPATS2L (-112199)
unnamed	KCNJ12 (-4984)	COL23A1 (+28706)	PARD3B (-7410)
unnamed	KCNJ12 (+14666)	C5orf45 (-10076)	PARD3B (+4827)
unnamed	KCNJ12 (+22916)	SCGB3A1 (-27698)	KLF7 (-175169)
unnamed	CRYBA1 (-5431)	FOXC1 (+4669)	CRYGD (+5237)
unnamed	RAB11FIP4 (+106971)	RREB1 (+66709)	PTH2R (+177082)
unnamed	CCL2 (-123654)	DSP (+392)	MAP2 (-190382)
unnamed	HAP1 (-4504)	TFAP2A (+595)	SPAG16 (+167500)
unnamed	JUP (-6413)	TFAP2A (-11080)	SLC4A3 (+286033)
unnamed	PTRF (-5290)	BTN2A2 (+596)	SLC4A3 (+413746)
unnamed	NAGLU (-23565)	TRIM26 (-7)	SCG2 (+63658)
unnamed	PYY (+9712)	DPCR1 (+14839)	SCG2 (-86179)
unnamed	FZD2 (+44888)	EGFL8 (+1481)	FAM124B (-65099)
unnamed	CRHR1 (-12973)	TCP11 (-6639)	PRSS56 (-8235)
unnamed	WNT3 (+32613)	GUCA1A (-16321)	SH3BP4 (-182016)
unnamed	WNT9B (-9764)	CRIP3 (+297)	SH3BP4 (-9679)
unnamed	PHB (-38696)	VEGFA (-27881)	AGAP1 (+83099)
unnamed	KAT7 (-12204)	VEGFA (+79344)	GBX2 (-40263)
unnamed	TAC4 (-16609)	MRPL14 (-6869)	ASB1 (+159923)
unnamed	DLX4 (-57663)	TFAP2B (+3039)	TWIST2 (+278302)
unnamed	DLX4 (-23788)	DST (+100744)	HDAC4 (+42443)
unnamed	COL1A1 (-18557)	TBX18 (-376)	HDAC4 (+19543)
unnamed	TOB1 (-37694)	FYN (+29880)	FKBP1A (-34082)
unnamed	TBX2 (-46807)	EPB41L2 (+64037)	SIRPA (-118404)
unnamed	TBX2 (-30669)	CTGF (-1550)	PDYN (+19715)
unnamed	TBX2 (-15232)	UST (+285899)	SMOX (+12887)
unnamed	SCN4A (-16197)	ZC3H12D (+3097)	PRND (-17431)
unnamed	TEX2 (+46737)	RMND1 (-42066)	PRNT (-20411)
unnamed	RGS9 (+7033)	SYTL3 (+3624)	LAMP5 (+6155)
unnamed	AXIN2 (+90590)	TMEM184A (-1747)	SLX4IP (+88962)
unnamed	AXIN2 (-213073)	NUDT1 (+28568)	JAG1 (+69656)
unnamed	CACNG5 (-256072)	LFNG (-42088)	JAG1 (+40231)
unnamed	CDC42EP4 (+21814)	AP5Z1 (+42910)	ZNF133 (-20433)
unnamed	CDC42EP4 (-98849)	PAPOLB (+62)	RALGAPA2 (-221122)
unnamed	SDK2 (+44165)	RADIL (+3025)	NKX2-4 (+6228)
unnamed	LLGL2 (+24555)	TWIST1 (+5945)	EPB41L1 (+8066)
unnamed	RNF157 (-12234)	TWIST1 (-505)	BLCAP (-70567)
unnamed	MXRA7 (+12274)	FERD3L (+706)	VSTM2L (-98031)
unnamed	SEPT9 (-26842)	HOXA2 (-333)	DHX35 (+104997)
unnamed	SOCS3 (-7405)	CHN2 (-48090)	TOP1 (-82520)
unnamed	CBX4 (-10235)	GHRHR (-25375)	CHD6 (-520492)
unnamed	TBC1D16 (+45884)	C7orf69 (-31251)	PTPRT (+92873)
unnamed	TMEM105 (+7236)	UPP1 (+1334)	GTSF1L (-72625)
unnamed	CSNK1D (-10418)	DDC (+4804)	ADA (+5533)
unnamed	TEX19 (-2285)	ELN (+14144)	WISP2 (-8222)
unnamed	B3GNTL1 (+14686)	SRCRB4D (+774)	EYA2 (+65062)
unnamed	METRNL (-9004)	COL1A2 (-523)	PARD6B (-103031)
unnamed	METRNL (+71258)	PON2 (+260)	ZNF217 (-118147)
unnamed	THOC1 (-94361)	PDK4 (-12397)	RTFDC1 (-24522)
unnamed	THOC1 (-103748)	BRI3 (+23276)	BMP7 (+173721)
unnamed	ADCYAP1 (+109415)	PCOLCE (+813)	BMP7 (+68021)
unnamed	TMEM200C (-159721)	SH2B2 (+19295)	BMP7 (+54484)
unnamed	ARHGAP28 (-82261)	LRRC17 (+887)	PCK1 (-7511)
unnamed	PTPRM (+41758)	AASS (-10237)	PCK1 (+10964)
unnamed	PTPRM (+183408)	FLNC (+1832)	PMEPA1 (-231680)
unnamed	SOGA2 (+16956)	NRF1 (+160695)	EDN3 (+103668)
unnamed	APCDD1 (-251425)	CPA1 (+3176)	CDH4 (+248243)
unnamed	APCDD1 (-207712)	KLF14 (+263)	TAF4 (+225616)
unnamed	CHMP1B (-61607)	CALD1 (+85949)	KCNQ2 (+55141)
unnamed	CIDEA (+3232)	CREB3L2 (+68640)	CHODL (-125500)
unnamed	TUBB6 (-19308)	PARP12 (+106021)	OLIG2 (-48005)
unnamed	MIB1 (+155582)	EPHA1 (+12372)	OLIG1 (+5375)
unnamed	GATA6 (+24134)	PRKAG2 (+83772)	SIM2 (-92721)
unnamed	CTAGE1 (+70028)	EN2 (-76911)	DSCR3 (+9183)
unnamed	CABLES1 (+7248)	EN2 (+3164)	TSPEAR (-39580)
unnamed	CABLES1 (+139823)	EN2 (+51401)	SLC19A1 (-33478)
unnamed	HRH4 (+338832)	SHH (-844533), RNF32 (+16022)	PCBP3 (+148817)
unnamed	HRH4 (+371132)	DNAJB6 (+276290)	SEPT5 (-22512)
unnamed	HRH4 (+401757)	ERI1 (+55656)	ARVCF (+17368)
unnamed	ZNF521 (+422553)	PPP1R3B (-194)	ARVCF (+7781)
unnamed	ZNF521 (+280216)	BLK (+60428)	MTMR3 (-11031)
unnamed	ZNF521 (-65659)	CTSB (+14638)	FBXO7 (+27887)
unnamed	KCTD1 (+143274)	NUDT18 (+13932)	FBXO7 (+57650)
unnamed	KCTD1 (+127224)	ENSG00000248235 (-887)	SYN3 (+58370)
unnamed	KCTD1 (+69074)	KIAA1967 (+24268)	MCM5 (+52694)
unnamed	AQP4 (+73719)	GNRH1 (+31707)	KCNJ4 (+24792)
unnamed	TTR (-19251)	EBF2 (-350)	CBX7 (-21108)
unnamed	SLC14A2 (-98116)	RBPMS (+623)	CBX7 (-27245)
unnamed	SMAD2 (-105263)	SMIM18 (-81517)	PDGFB (-34719)
unnamed	ZBTB7C (+111874)	ZNF703 (-140094)	TAB1 (+5779)
unnamed	ZBTB7C (+105724)	STAR (+33)	SMCR7L (-21208)
unnamed	ZBTB7C (+80537)	FGFR1 (+37100)	CACNA1I (+129380)
unnamed	ZBTB7C (-37426)	FGFR1 (+31763)	CACNA1I (+135080)
unnamed	CTIF (-84866)	NKX6-3 (-41447)	CACNA1I (+144355)
unnamed	CTIF (+75609)	IKBKB (-5270)	GRAP2 (+133127)
unnamed	SMAD4 (-12558)	CEBPD (+78485)	CSDC2 (+8071)
unnamed	FECH (+43336)	TTPA (-601)	SCUBE1 (+34244)
unnamed	NEDD4L (+180828)	CHMP4C (+31)	FAM19A5 (+140466)
unnamed	ALPK2 (+290076)	CA13 (+94)	FAM19A5 (+555516)
unnamed	ALPK2 (+224201)	GDF6 (+1032)	FAM19A5 (+614616)
unnamed	CDH20 (+248398)	SDC2 (+1721)	BRD1 (+624977)
unnamed	ZCCHC2 (-23352)	MATN2 (+63220)	BRD1 (+531552)
unnamed	ZCCHC2 (+88073)	RPL30 (+39392)	BRD1 (+40477)
unnamed	BCL2 (+244898)	STK3 (+1674)	PIM3 (-11023)
unnamed	BCL2 (+176211)	AARD (+275)	SETMAR (-8438)
unnamed	BCL2 (+164573)	ENPP2 (-34855)	LMCD1 (-57630)
unnamed	BCL2 (+81073)	ZHX2 (-291483)	LHFPL4 (+53661)
unnamed	SMIM21 (+35870)	ZHX1 (+90747)	ATP2B2 (-46957)
unnamed	ZNF516 (-26854)	NDUFB9 (+23644)	IQSEC1 (+22743)
unnamed	MBP (+62125)	NDRG1 (+48591)	NUP210 (+177196)
unnamed	GALR1 (+649658)	GPR20 (+38329)	CMTM7 (-67700)
unnamed	GALR1 (+661295)	LYPD2 (+514)	DCLK3 (-64973)
unnamed	SALL3 (-452037)	EPPK1 (-2343)	SCN5A (+66425)
unnamed	NFATC1 (+24264)	DGAT1 (+12798)	CDCP1 (-20786)
unnamed	PARD6G (+14279)	TONSL (-373)	BSN (-14459)
unnamed	MISP (+2124)	DOCK8 (+85)	APEH (-57360)
unnamed	MLLT1 (+6471)	PSIP1 (-529958)	RBM6 (+63859)
unnamed	VAV1 (+29013)	BNC2 (-146)	TMEM115 (-71322)
unnamed	ACTL9 (+67909)	PTPLAD2 (-115)	CACNA2D2 (+22516)
unnamed	RFX1 (+19709)	AQP7 (+10904)	CACNA2D2 (+12179)
unnamed	NDUFB7 (+11749)	CD72 (+2189)	CACNA2D2 (-14134)
unnamed	GDF15 (-180)	TPM2 (+2579)	C3orf18 (+32044)
unnamed	CRTC1 (-35163)	PAX5 (-2347)	CISH (+10290)
unnamed	PLEKHF1 (+12650)	ECM2 (-64863)	DNAH1 (+4128)
unnamed	PLEKHF1 (+16912)	IPPK (+60247)	PRKCD (+7439)
unnamed	URI1 (+206955)	FGD3 (+20342)	FAM3D (-865388)
unnamed	ZNF536 (-67144)	SUSD3 (+2711)	FAM3D (-943250)
unnamed	CEBPA (+27182)	BARX1 (+1979)	MAGI1 (+276558)
unnamed	KCTD15 (-39778)	FANCC (+223046)	PDZRN3 (+197291)
unnamed	LSM14A (+88604)	ANKS6 (+4783)	LSAMP (-418172)
unnamed	ACTN4 (+37228)	PTPN3 (+78386)	FSTL1 (-53100)
unnamed	NCCRP1 (-33813)	PTPN3 (+57586)	ALDH1L1 (-32046)
unnamed	PLAUR (-17061)	TXN (+130545)	PLXNA1 (-120962)
unnamed	SAE1 (+27330)	AMBP (+464)	PLXNA1 (+167176)
unnamed	GLTSCR1 (+5235)	COL27A1 (+7285)	DNAJB8 (+54248)
unnamed	CCDC155 (+15688)	COL27A1 (+14435)	TRH (+10815)
unnamed	KLK15 (-4721)	TNFSF15 (+1193)	EPHB1 (+238946)
unnamed	SBK2 (+15443)	GSN (-12621)	STAG1 (+92910)
unnamed	ENSG00000231274 (-4516)	DAB2IP (+1251)	ZIC4 (+45696)
unnamed	TPO (-4470)	DAB2IP (+11639)	PLCH1 (+257690)
unnamed	PXDN (+102790)	PTGS1 (+3604)	PLCH1 (+254428)
unnamed	PXDN (+46803)	CRB2 (+20186)	MECOM (-97045)
unnamed	MBOAT2 (-93796)	NR5A1 (-5241)	TBL1XR1 (+275703)
unnamed	GRHL1 (-11327)	RPL35 (+8065)	SOX2 (+168591)
unnamed	KLF11 (-13157)	GAPVD1 (+208714)	CHRD (+35539)
unnamed	RRM2 (+82033)	LMX1B (-90159)	EPHB3 (+41566)
unnamed	HPCAL1 (-32438)	LMX1B (-79734)	EPHB3 (+71266)
unnamed	ODC1 (-101683)	LMX1B (+4416)	EPHB3 (+96841)
unnamed	GREB1 (-22317)	SLC2A8 (-8271)	EPHB3 (+125178)
unnamed	LPIN1 (+21792)	LRSAM1 (+40783)	DGKG (-51837)
unnamed	LPIN1 (+491942)	PTRH1 (+13089)	LEPREL1 (+43455)
unnamed	OSR1 (+152527)	SH2D3C (+10957)	OPA1 (+143930)
unnamed	OSR1 (+128014)	ST6GALNAC6 (-8568)	HES1 (+31041)
unnamed	OSR1 (-216386)	NAIF1 (+10800)	LRRC15 (-11801)
unnamed	TTC32 (+165672)	GOLGA2 (+32293)	LRRC15 (-16801)
unnamed	TTC32 (+43134)	URM1 (+16902)	XXYLT1 (+209033)
unnamed	LAPTM4A (-20836)	SH3GLB2 (+15791)	XXYLT1 (+158621)
unnamed	LAPTM4A (-28449)	SH3GLB2 (+5716)	XXYLT1 (+75271)
unnamed	LAPTM4A (-78524)	PRRX2 (+2930)	XXYLT1 (+66546)
unnamed	SDC1 (+39769)	PTGES (+413)	CRIPAK (-22002)
unnamed	SDC1 (+13956)	ASS1 (+22476)	NKX1-1 (-114794)
unnamed	RHOB (+27153)	LAMC3 (+2556)	NKX1-1 (-135819)
unnamed	RHOB (+41115)	COL5A1 (-91570)	LETM1 (-7214)
unnamed	RHOB (+77415)	QSOX2 (-17563)	ZFYVE28 (+57952)
unnamed	ADCY3 (-5930)	CARD9 (+295)	ENSG00000168824 (+10308)
unnamed	POMC (+70409)	ARHGAP6 (+108)	ENSG00000168824 (+29621)
unnamed	POMC (-9403)	TRAPPC2 (+16256)	STX18 (-69370)
unnamed	SLC35F6 (+4144)	ASB9 (-18)	PPP2R2C (+16759)
unnamed	FOSL2 (-44850)	ATP6AP2 (+42903)	BLOC1S4 (+10783)
unnamed	WDR43 (+64429)	NYX (+27838)	TBC1D14 (+52528)
unnamed	PKDCC (-56860)	IQSEC2 (+36359)	HTRA3 (+74133)
unnamed	COX7A2L (+27075)	ITIH6 (+10635)	SLC2A9 (+72032)
unnamed	HAAO (-61881)	STARD8 (+48328)	DCAF16 (+47493)
unnamed	HAAO (-135043)	NRK (-161)	SLIT2 (+13063)
unnamed	HAAO (-177143)	RIPPLY1 (-17016)	SOD3 (+21653)
unnamed	HAAO (-184481)	ENSG00000134602 (+732)	RBPJ (+11493)
unnamed	ZFP36L2 (+21498)	HPRT1 (+85455)	TBC1D1 (+19192)
unnamed	ZFP36L2 (-24727)	GPR50 (-275)	NSUN7 (-76776)
unnamed	PPM1B (-81191)	IRAK1 (+6618)	APBB2 (+73511)
unnamed	SIX2 (-210956)		CEP135 (+157378)
unnamed	SIX2 (-214669)		YTHDC1 (-23506)
unnamed	SIX2 (-250969)		RUFY3 (-11537)
unnamed	SIX2 (-273056)		SHROOM3 (+172860)
unnamed	EPAS1 (-118166)		SEPT11 (-92943)
unnamed	EPAS1 (-66116)		HNRNPD (+89046)
unnamed	KCNK12 (-30322)		ARHGAP24 (+202033)
unnamed	KCNK12 (-46547)		AFF1 (+25384)
unnamed	SPTBN1 (+116978)		CXXC4 (-6387)
unnamed	TMEM17 (-64612)		LEF1 (+33128)
unnamed	SPRED2 (+48473)		SEC24B (-11008)
unnamed	SPRED2 (-225727)		ELOVL6 (+14121)
unnamed	SPRED2 (-365939)		C4orf32 (-357015)
unnamed	MEIS1 (-117757)		PHF17 (-21529)
unnamed	MEIS1 (+146943)		KIAA0922 (+99349)
unnamed	ANTXR1 (+164715)		SFRP2 (-45616)
unnamed	DYSF (+205393)		CBR4 (+204984)
unnamed	DYSF (+236256)		CBR4 (-7391)
unnamed	CYP26B1 (+113392)		SH3RF1 (-45157)
unnamed	CTNNA2 (+208656)		HMGB2 (+70288)
unnamed	KCMF1 (-12366)		SCRG1 (-16338)
unnamed	TGOLN2 (+90634)		TRAPPC11 (+99293)
unnamed	ATOH8 (-15929)		STOX2 (+134879)
unnamed	ST3GAL5 (-64901)		SORBS2 (+136356)
unnamed	CD8A (-16694)		SORBS2 (+86518)
unnamed	SMYD1 (-64449)		MTNR1A (-15517)
unnamed	TEX37 (+25306)		MTNR1A (-22679)
unnamed	MAL (-7604)		FAT1 (+66184)
unnamed	MAL (+33721)		FAT1 (+54359)
unnamed	FAHD2A (-13499)		FAT1 (+23321)
unnamed	ARID5A (+17364)		FAT1 (-41816)
unnamed	CNGA3 (-65843)		TRIML1 (+300565)
unnamed	RNF149 (-22017)		FRG1 (-738743)
unnamed	EDAR (-32135)		SLC9A3 (-8703)
unnamed	ACOXL (+103838)		TPPP (+19672)
unnamed	BCL2L11 (-140668)		NKD2 (-15831)
unnamed	ANAPC1 (+266879)		NKD2 (+10456)
unnamed	PSD4 (-9010)		CLPTM1L (-41386)
unnamed	DDX18 (-211113)		MRPL36 (+98196)
unnamed	INSIG2 (+135975)		IRX4 (-8631)
unnamed	EN1 (+40104)		IRX1 (-397730)
unnamed	EN1 (+33304)		IRX1 (+603007)
unnamed	GYPC (+16291)		IRX1 (+611132)
unnamed	TANC1 (+61892)		ADAMTS16 (-477643)
unnamed	WDSUB1 (+132728)		TRIO (+5964)
unnamed	RBMS1 (-90845)		TRIO (+114339)
unnamed	TANK (-25420)		BASP1 (+24769)
unnamed	NOSTRIN (-162898)		NONE
unnamed	ITGA6 (-142617)		AMACR (+6620)
unnamed	RAPGEF4 (+47206)		IL7R (+2512)
unnamed	SP3 (-47333)		OSMR (-36301)
unnamed	SP3 (-60083)		IL31RA (-29521)
unnamed	SP3 (-87233)		CARTPT (+90323)
unnamed	WIPF1 (-32981)		MAP1B (-174023)
unnamed	TTC30A (-143994)		SV2C (+31153)
unnamed	FZD5 (-13276)		TBCA (-69740)
unnamed	MREG (+11321)		TBCA (-75590)
unnamed	IGFBP5 (-79665)		ZFYVE16 (-38144)
unnamed	TNS1 (+333513)		MTRNR2L2 (+35555)
unnamed	TNS1 (+326213)		ATP6AP1L (+13532)
unnamed	TNS1 (-21574)		ATP6AP1L (+97382)
unnamed	SLC4A3 (+286121)		EDIL3 (+270911)
unnamed	PAX3 (+29512)		GPR98 (+381683)
unnamed	PAX3 (-13275)		LNPEP (+33157)
unnamed	IRS1 (+61237)		ST8SIA4 (+74882)
unnamed	CAB39 (-54122)		PAM (+75311)
unnamed	CAB39 (-45872)		NUDT12 (+134569)
unnamed	GPR55 (-3734)		EFNA5 (-25817)
unnamed	PRSS56 (-15510)		EFNA5 (-280354)
unnamed	ATG16L1 (-7092)		FER (-61398)
unnamed	ARL4C (+162234)		PJA2 (-45768)
unnamed	ARL4C (-189966)		MAN2A1 (+50846)
unnamed	SH3BP4 (-9816)		SEMA6A (-51670)
unnamed	AGAP1 (+59924)		FSTL4 (+228767)
unnamed	AGAP1 (+103187)		FSTL4 (+209555)
unnamed	GBX2 (+308487)		FSTL4 (-169295)
unnamed	GBX2 (+302674)		NRG2 (+60841)
unnamed	GBX2 (+82937)		NR3C1 (+173541)
unnamed	GBX2 (+63012)		YIPF5 (+141835)
unnamed	ACKR3 (+36329)		YIPF5 (+81123)
unnamed	ASB1 (+132635)		KCTD16 (+393423)
unnamed	ASB1 (+161185)		ADRB2 (+86632)
unnamed	ASB1 (+210298)		PPARGC1B (+48126)
unnamed	TWIST2 (-118823)		NDST1 (+22914)
unnamed	TWIST2 (+17840)		GLRA1 (-199853)
unnamed	TWIST2 (+132452)		GRIA1 (+27893)
unnamed	TWIST2 (+180115)		FAM114A2 (+259366)
unnamed	TWIST2 (+242690)		KIF4B (+302653)
unnamed	HDAC4 (-315782)		CLINT1 (-89874)
unnamed	ANGPT4 (+4672)		EBF1 (+509081)
unnamed	RNF24 (-22672)		EBF1 (+178356)
unnamed	SMOX (+5749)		PTTG1 (+134083)
unnamed	SMOX (+12749)		WWC1 (-187555)
unnamed	PRND (-17618)		WWC1 (+42220)
unnamed	PRNT (-20411)		PANK3 (-273183)
unnamed	SLX4IP (+88912)		PANK3 (-277045)
unnamed	SLX4IP (+115462)		FOXI1 (+77137)
unnamed	JAG1 (+42444)		KCNIP1 (+30173)
unnamed	JAG1 (-871694)		KCNIP1 (+50086)
unnamed	SLC24A3 (+241123)		KCNIP1 (+108073)
unnamed	SLC24A3 (+300035)		GABRP (-37323)
unnamed	RIN2 (-303277)		DRD1 (+339248)
unnamed	XRN2 (-283117)		PHYKPL (-47327)
unnamed	FOXA2 (+154338)		PHYKPL (-116102)
unnamed	FOXA2 (+15776)		COL23A1 (+155593)
unnamed	FOXA2 (-68424)		TBC1D9B (-66741)
unnamed	SSTR4 (-213207)		RASGEF1C (-33726)
unnamed	CD93 (-33398)		MGAT1 (+23479)
unnamed	BLCAP (-70192)		IRF4 (+83061)
unnamed	TOP1 (-168870)		FOXF2 (+20231)
unnamed	EMILIN3 (-20408)		FOXC1 (-55293)
unnamed	EMILIN3 (-26583)		MYLK4 (+4037)
unnamed	JPH2 (+33280)		TUBB2B (-67219)
unnamed	WISP2 (-8122)		LY86 (+74947)
unnamed	SLC35C2 (+31750)		SSR1 (+51827)
unnamed	SLC2A10 (+74974)		OFCC1 (-159923)
unnamed	SNAI1 (+47514)		GCNT6 (-35030)
unnamed	UBE2V1 (+61041)		HIVEP1 (-93471)
unnamed	ADNP (+59175)		TBC1D7 (-24044)
unnamed	TSHZ2 (+189992)		ATXN1 (+164937)
unnamed	ZNF217 (+149565)		NUP153 (-18782)
unnamed	DOK5 (+173814)		RNF144B (+361119)
unnamed	BMP7 (+173484)		KAAG1 (-32993)
unnamed	BMP7 (+68046)		GPX5 (+17623)
unnamed	BMP7 (-24491)		DPCR1 (+1776)
unnamed	RBM38 (+43350)		MLN (-100837)
unnamed	RBM38 (+50112)		GRM4 (+131130)
unnamed	PCK1 (+8527)		PPIL1 (+10437)
unnamed	ZBP1 (+25304)		PIM1 (-38779)
unnamed	PMEPA1 (-231617)		LRFN2 (-53484)
unnamed	APCDD1L (+17856)		FOXP4 (-89789)
unnamed	GNAS (-57906)		GUCA1A (-17634)
unnamed	EDN3 (+14243)		MRPS10 (-33485)
unnamed	EDN3 (+103631)		UBR2 (-15912)
unnamed	EDN3 (+124318)		TTBK1 (+7932)
unnamed	CABLES2 (-26747)		VEGFA (+36919)
unnamed	GATA5 (-9512)		VEGFA (+64294)
unnamed	GATA5 (-31724)		VEGFA (+79394)
unnamed	SLCO4A1 (+5728)		VEGFA (+84919)
unnamed	BIRC7 (-15622)		VEGFA (+121769)
unnamed	TIAM1 (+44052)		VEGFA (+163331)
unnamed	OLIG1 (+5750)		TMEM63B (-136588)
unnamed	CLIC6 (+149200)		MLIP (-31551)
unnamed	RUNX1 (+183116)		TMEM30A (-5766)
unnamed	RUNX1 (+61628)		GABRR2 (+3130)
unnamed	RUNX1 (+13003)		EPHA7 (+241469)
unnamed	SIM2 (-93309)		HACE1 (+159681)
unnamed	DSCR3 (+9270)		RFPL4B (+533031)
unnamed	ERG (+150905)		MARCKS (-184241)
unnamed	ETS2 (+176507)		HS3ST5 (-364479)
unnamed	PSMG1 (+97702)		SLC35F1 (+300649)
unnamed	IGSF5 (+18541)		HDDC2 (-55431)
unnamed	RIPK4 (+41291)		HDDC2 (-60893)
unnamed	RIPK4 (-4134)		HEY2 (-220713)
unnamed	ABCG1 (+8547)		HEY2 (-215501)
unnamed	SIK1 (+27483)		HEY2 (-164963)
unnamed	HSF2BP (+73774)		OLIG3 (+79243)
unnamed	AGPAT3 (-65201)		UTRN (-25840)
unnamed	LRRC3DN (+2686)		EPM2A (+596235)
unnamed	TSPEAR (-39480)		EPM2A (+307247)
unnamed	COL18A1 (-4840)		PLEKHG1 (-32449)
unnamed	COL6A2 (-16373)		PLEKHG1 (+113189)
unnamed	PRMT2 (-12987)		MTHFD1L (-110985)
unnamed	SEPT5 (-22549)		MTHFD1L (+179665)
unnamed	GP1BB (+15645)		CNKSR3 (-27245)
unnamed	TBX1 (-11063)		ARID1B (-178425)
unnamed	TBX1 (-5738)		TMEM242 (+187183)
unnamed	BCR (+89441)		AGPAT4 (+74755)
unnamed	ZNRF3 (+51833)		AGPAT4 (+18105)
unnamed	SEC14L2 (-4171)		AGPAT4 (+7505)
unnamed	FBXO7 (+147987)		AGPAT4 (-44632)
unnamed	SYN3 (+58283)		QKI (-58575)
unnamed	LARGE (+162821)		QKI (+832050)
unnamed	MYH9 (+35875)		MPC1 (-216339)
unnamed	MYH9 (-46087)		MPC1 (-238314)
unnamed	TXN2 (+18764)		RPS6KA2 (+173026)
unnamed	TXN2 (+11839)		RPS6KA2 (+155214)
unnamed	CBX7 (-23058)		RPS6KA2 (+124939)
unnamed	CBX7 (-32683)		RPS6KA2 (+120051)
unnamed	PDGFB (-5519)		RPS6KA2 (+10726)
unnamed	PDGFB (-24719)		CCR6 (-7444)
unnamed	RPL3 (+36326)		MLLT4 (-7196)
unnamed	RPL3 (+20688)		SMOC2 (+403719)
unnamed	RPL3 (+9926)		DLL1 (+152023)
unnamed	CACNA1I (+126580)		DLL1 (+106548)
unnamed	CACNA1I (+135317)		GPER (+16157)
unnamed	CACNA1I (+138642)		UNCX (-21705)
unnamed	CACNA1I (+145355)		UNCX (+7982)
unnamed	ARFGAP3 (+51670)		UNCX (+18257)
unnamed	TTLL12 (-55711)		UNCX (+27982)
unnamed	WNT7B (+69096)		UNCX (+56370)
unnamed	FAM19A5 (+452803)		UNCX (+98832)
unnamed	FAM19A5 (+524291)		UNCX (+109082)
unnamed	FAM19A5 (+555078)		MICALL2 (+36275)
unnamed	FAM19A5 (+626816)		MICALL2 (-7275)
unnamed	FAM19A5 (+663091)		ELFN1 (-20130)
unnamed	BRD1 (+531714)		LFNG (-30813)
unnamed	BHLHE40 (+17537)		GNA12 (+35908)
unnamed	LMCD1 (-58243)		GNA12 (+20783)
unnamed	LMCD1 (-10418)		PAPOLB (+19937)
unnamed	LMCD1 (+52807)		RNF216 (+84170)
unnamed	LHFPL4 (+53673)		RPA3 (-50837)
unnamed	IQSEC1 (+21455)		PHF14 (+230876)
unnamed	NUP210 (+176534)		ITGB8 (+19642)
unnamed	XPC (-24555)		SP8 (-237695)
unnamed	SLC6A6 (-78988)		TAX1BP1 (+200142)
unnamed	SLC6A6 (-59038)		AQP1 (+21655)
unnamed	SLC6A6 (+10637)		NPSR1 (+4491)
unnamed	SLC6A6 (+60699)		HERPUD2 (+189845)
unnamed	UBE2E1 (-94344)		AOAH (+116928)
unnamed	RARB (+26386)		ELMO1 (+339477)
unnamed	ITGA9 (+16065)		GLI3 (+39312)
unnamed	CTDSPL (-96165)		PSMA2 (-59978)
unnamed	CTDSPL (-89102)		OGDH (+32850)
unnamed	CTNNB1 (-23605)		C7orf69 (-70339)
unnamed	CDC25A (+46871)		HUS1 (-12423)
unnamed	DAG1 (-14790)		VWC2 (-129794)
unnamed	APEH (-57697)		GRB10 (+34525)
unnamed	CACNA2D2 (+12154)		COBL (-771679)
unnamed	C3orf18 (+17807)		SEC61G (-128658)
unnamed	CISH (+10553)		VOPP1 (+69930)
unnamed	ALAS1 (-13497)		AUTS2 (+138731)
unnamed	SEMA3G (+14793)		WBSCR28 (+8649)
unnamed	PRKCD (-14961)		WBSCR28 (+58449)
unnamed	WNT5A (-65515)		GTF2IRD1 (-24137)
unnamed	KCTD6 (-26575)		HIP1 (+115327)
unnamed	FAM3D (-943175)		DMTF1 (-23232)
unnamed	SLC25A26 (-17060)		CDK14 (-31749)
unnamed	LRIG1 (-155057)		SAMD9 (+71211)
unnamed	RYBP (+141181)		COL1A2 (-170685)
unnamed	PPP4R2 (+146464)		SMURF1 (+6798)
unnamed	ADCY5 (+105167)		MYL10 (+26238)
unnamed	UMPS (+71475)		CUX1 (+59197)
unnamed	ITGB5 (+50944)		FEZF1 (-11654)
unnamed	EEFSEC (+14566)		TAS2R16 (+23329)
unnamed	GATA2 (-55947)		SND1 (+38354)
unnamed	MRPL3 (-58150)		SND1 (+180054)
unnamed	TOPBP1 (-13613)		LRRC4 (+12148)
unnamed	AMOTL2 (+43923)		LEP (-86049)
unnamed	AMOTL2 (-22239)		LEP (+26138)
unnamed	MRAS (+34474)		AHCYL2 (-6139)
unnamed	PIK3CB (-10894)		UBE2H (+35439)
unnamed	CLSTN2 (+117036)		PLXNA4 (+344610)
unnamed	SLC25A36 (-120166)		BRAF (-3799)
unnamed	ZBTB38 (-54904)		TMEM178B (+164643)
unnamed	GRK7 (-8402)		AGK (-120001)
unnamed	ZIC4 (+26333)		AGK (-88589)
unnamed	SIAH2 (-8799)		CUL1 (-654966)
unnamed	CCNL1 (+49902)		CUL1 (-350654)
unnamed	MFSD1 (-33241)		CUL1 (-301354)
unnamed	SCHIP1 (-63712)		NOS3 (-3308)
unnamed	SCHIP1 (-21362)		PRKAG2 (+94147)
unnamed	C3orf80 (-67335)		ACTR3B (+542116)
unnamed	MECOM (-97070)		DPP6 (-377790)
unnamed	MECOM (-139382)		EN2 (+32689)
unnamed	ACTRT3 (+177383)		SHH (-584621), C7orf13 (+243760)
unnamed	ACTRT3 (+150508)		UBE3C (-60494)
unnamed	ACTRT3 (+70033)		DNAJB6 (+326115)
unnamed	CLDN11 (+7547)		PTPRN2 (+489696)
unnamed	TMEM212 (+20274)		ESYT2 (+10969)
unnamed	KLHL6 (-27086)		TDRP (-288757)
unnamed	EPHB3 (+48766)		TDRP (-347682)
unnamed	EPHB3 (+52616)		DLGAP2 (-419269)
unnamed	EPHB3 (+57566)		MYOM2 (+154008)
unnamed	EPHB3 (+71591)		CSMD1 (-355712)
unnamed	EPHB3 (+84853)		ENSG00000182319 (+99858)
unnamed	EPHB3 (+108728)		ENSG00000182319 (-143730)
unnamed	LEPREL1 (+43955)		GATA4 (-90600)
unnamed	LEPREL1 (+38855)		GATA4 (-71775)
unnamed	HRASLS (-352589)		GFRA2 (+223022)
unnamed	HES1 (-238921)		EGR3 (-26335)
unnamed	HES1 (-102159)		DPYSL2 (+31904)
unnamed	LRRC15 (-12589)		SCARA3 (+35577)
unnamed	TMEM44 (+61275)		NUGGC (+10588)
unnamed	LSG1 (-76807)		FZD3 (+22590)
unnamed	XXYLT1 (+237508)		RBPMS (+38873)
unnamed	XXYLT1 (+227383)		GPR124 (+24489)
unnamed	XXYLT1 (+210333)		BRF2 (+23547)
unnamed	NRROS (+3768)		PLEKHA2 (+36410)
unnamed	RNF212 (+8201)		SFRP1 (-21197)
unnamed	CRIPAK (-21915)		NKX6-3 (-108122)
unnamed	NKX1-1 (-122119)		ANK1 (+68280)
unnamed	FAM53A (+85150)		ANK1 (+62180)
unnamed	FAM53A (+72738)		CLVS1 (-250826)
unnamed	WHSC1 (-14334)		ADHFE1 (+13829)
unnamed	ZFYVE28 (+28690)		SLCO5A1 (+23961)
unnamed	STX18 (+16755)		TMEM64 (-24964)
unnamed	STX18 (-66158)		CDH17 (-25598)
unnamed	STX18 (-69633)		SDC2 (+31446)
unnamed	STX18 (-100058)		TSPYL5 (+45363)
unnamed	STX18 (-125083)		TSPYL5 (+18301)
unnamed	MSX1 (-39068)		PABPC1 (-87273)
unnamed	SORCS2 (-20740)		TRPS1 (+120915)
unnamed	ABLIM2 (+26973)		SNTB1 (-119725)
unnamed	HTRA3 (+77108)		TMEM65 (+109858)
unnamed	CPZ (+102438)		NSMCE2 (+163368)
unnamed	CPZ (+111476)		TRIB1 (+149337)
unnamed	HMX1 (-25695)		AGO2 (-156270)
unnamed	SLIT2 (+67201)		LY6D (-11817)
unnamed	SOD3 (+21315)		ZC3H3 (+28323)
unnamed	RBM47 (-61988)		EPPK1 (-7931)
unnamed	CORIN (+12878)		JAK2 (-50082)
unnamed	RASL11B (-36807)		KDM4C (+453619)
unnamed	SPINK2 (+37595)		ZDHHC21 (+150994)
unnamed	YTHDC1 (-23556)		PSIP1 (-642883)
unnamed	SEPT11 (-117993)		BNC2 (+355379)
unnamed	NKX6-1 (+16278)		AQP7 (+26792)
unnamed	AFF1 (+25821)		KIAA1161 (+12838)
unnamed	ADH7 (-3372)		CCIN (-14826)
unnamed	LEF1 (-193935)		MELK (+229991)
unnamed	SEC24B (-10296)		PAX5 (+213615)
unnamed	PRDM5 (+189016)		PAX5 (+206853)
unnamed	EDNRA (-193346)		PAX5 (+142290)
unnamed	MAB21L2 (-215289)		PIP5K1B (+124572)
unnamed	SFRP2 (-140016)		PSAT1 (+15841)
unnamed	PLRG1 (+38387)		RMI1 (+120825)
unnamed	PALLD (+62745)		SLC28A3 (+158835)
unnamed	CBR4 (-40079)		SLC28A3 (+133660)
unnamed	NONE		FGD3 (+18517)
unnamed	TENM3 (-595107)		PHF2 (+4236)
unnamed	TENM3 (-2582)		FANCC (+225884)
unnamed	CLDN22 (+201402)		HSD17B3 (+83534)
unnamed	CDKN2AIP (-35706)		FOXE1 (-44686)
unnamed	CDKN2AIP (-13156)		FOXE1 (-21648)
unnamed	TRAPPC11 (-41220)		TBC1D2 (-124310)
unnamed	TRAPPC11 (+89418)		GABBR2 (+205241)
unnamed	TRAPPC11 (+98993)		ALG2 (+50925)
unnamed	STOX2 (+134629)		SEC61B (+37330)
unnamed	ENPP6 (+97076)		PTPN3 (+15998)
unnamed	ENPP6 (+53801)		ZNF618 (+81638)
unnamed	ENPP6 (+49326)		AMBP (+40227)
unnamed	ENPP6 (+17339)		KIF12 (-18563)
unnamed	IRF2 (+72659)		COL27A1 (+60535)
unnamed	SORBS2 (+18418)		ORM1 (-20123)
unnamed	TLR3 (+27694)		PAPPA (-209183)
unnamed	FAT1 (+54409)		PAPPA-AS1 (+96147)
unnamed	FAT1 (-41966)		PAPPA-AS1 (+31160)
unnamed	FAT1 (-121066)		PAPPA-AS1 (-76390)
unnamed	TRIML1 (+684302)		TRIM32 (-115418)
unnamed	SLC9A3 (-12991)		TRIM32 (+272607)
unnamed	SLC12A7 (-25400)		CDK5RAP2 (+114636)
unnamed	SLC6A19 (-39510)		GSN (-38958)
unnamed	CLPTM1L (-41549)		TTLL11 (+22372)
unnamed	LPCAT1 (+7929)		CRB2 (+35949)
unnamed	MRPL36 (+91421)		PSMB7 (+60193)
unnamed	IRX4 (-8706)		PSMB7 (-5370)
unnamed	IRX4 (-210093)		NR5A1 (+20434)
unnamed	IRX4 (-281681)		RPL35 (+26777)
unnamed	IRX4 (-363993)		LMX1B (+36991)
unnamed	IRX2 (+363776)		ANGPTL2 (-63863)
unnamed	IRX2 (+322363)		FAM129B (+13467)
unnamed	IRX2 (+206313)		DPM2 (-22075)
unnamed	IRX2 (+116851)		FUBP3 (-43030)
unnamed	IRX2 (+49401)		QRFP (+51050)
unnamed	C5orf38 (+62213)		LAMC3 (-15156)
unnamed	C5orf38 (+111463)		LAMC3 (+28494)
unnamed	C5orf38 (+246238)		NTNG2 (+22166)
unnamed	C5orf38 (+274726)		TTF1 (-18716)
unnamed	C5orf38 (+339926)		TTF1 (-51004)
unnamed	IRX1 (-318718)		TTF1 (-72529)
unnamed	IRX1 (-208168)		TTF1 (-81041)
unnamed	IRX1 (-77030)		TMEM8C (+14593)
unnamed	IRX1 (+10032)		VAV2 (+34457)
unnamed	ADAMTS16 (-477480)		WDR5 (-6722)
unnamed	ADCY2 (+24342)		COL5A1 (-102920)
unnamed	SEMA5A (+337624)		LHX3 (+31879)
unnamed	CDH6 (-74644)		TBL1X (+139327)
unnamed	PDZD2 (-19979)		SHROOM2 (+71267)
unnamed	GOLPH3 (+146643)		MID1 (-148814)
unnamed	AGXT2 (+3985)		NHS (+39707)
unnamed	EGFLAM (+6527)		FTHL17 (-939155)
unnamed	OSMR (-36113)		CASK (-265620)
unnamed	PPAP2A (-66341)		CASK (-324182)
unnamed	IL31RA (-29571)		IQSEC2 (+8622)
unnamed	PIK3R1 (+204540)		LAS1L (-47152)
unnamed	TMEM174 (+59241)		SNX12 (+15023)
unnamed	TMEM174 (+127328)		PIN4 (-85841)
unnamed	FOXD1 (+136602)		PCDH19 (+14133)
unnamed	FOXD1 (+29714)		COL4A6 (+140789)
unnamed	FOXD1 (+11589)		ARHGAP36 (-13203)
unnamed	IQGAP2 (-29974)		IGSF1 (+89553)
unnamed	TBCA (-69315)		HS6ST2 (+141285)
unnamed	MTX3 (+28643)		AFF2 (+37261)
unnamed	MTRNR2L2 (+35630)		MAMLD1 (+12539)
unnamed	RIOK2 (+121064)		CD99L2 (+56066)
unnamed	EFNA5 (-25879)		VMA21 (-109113)
unnamed	MAN2A1 (+50908)		VMA21 (+22062)
unnamed	WDR36 (+43061)		ZNF185 (-7961)
unnamed	SEMA6A (+179355)		BGN (-3472)
unnamed	SLC22A4 (+7114)
unnamed	IRF1 (-10435)
unnamed	VDAC1 (+9561)
unnamed	TCF7 (-43414)
unnamed	H2AFY (+128049)
unnamed	H2AFY (+92899)
unnamed	H2AFY (+72062)
unnamed	GFRA3 (+28560)
unnamed	TMEM173 (-3363)
unnamed	NRG2 (+89866)
unnamed	SPRY4 (+103078)
unnamed	SPRY4 (+75566)
unnamed	SPRY4 (+44366)
unnamed	YIPF5 (+81110)
unnamed	ADRB2 (+32407)
unnamed	ADRB2 (+86519)
unnamed	CSF1R (+5747)
unnamed	SYNPO (-26017)
unnamed	SYNPO (-18542)
unnamed	GM2A (-13765)
unnamed	FAT2 (-23070)
unnamed	FAT2 (-28258)
unnamed	FAT2 (-51633)
unnamed	GLRA1 (-200428)
unnamed	HAND1 (-43351)
unnamed	HAND1 (-109789)
unnamed	CLINT1 (-89449)
unnamed	EBF1 (+120594)
unnamed	EBF1 (+72681)
unnamed	EBF1 (+67044)
unnamed	EBF1 (+48169)
unnamed	IL12B (-179068)
unnamed	ADRA1B (-38265)
unnamed	ADRA1B (-8390)
unnamed	WWC1 (-346705)
unnamed	WWC1 (-218680)
unnamed	WWC1 (+40433)
unnamed	PANK3 (-241008)
unnamed	PANK3 (-276320)
unnamed	SLIT3 (+353958)
unnamed	SLIT3 (+139458)
unnamed	SLIT3 (+101058)
unnamed	FOXI1 (-160013)
unnamed	FOXI1 (+6624)
unnamed	FOXI1 (+43137)
unnamed	FOXI1 (+77562)
unnamed	LCP2 (-3957)
unnamed	KCNMB1 (-19944)
unnamed	KCNIP1 (+36161)
unnamed	FGF18 (+42915)
unnamed	FGF18 (+63203)
unnamed	FGF18 (+76328)
unnamed	FGF18 (+102065)
unnamed	FGF18 (+123078)
unnamed	FGF18 (+159478)
unnamed	STK10 (+41540)
unnamed	STK10 (+11765)
unnamed	DUSP1 (+36585)
unnamed	RPL26L1 (-56046)
unnamed	PHYKPL (-47364)
unnamed	PHYKPL (-96027)
unnamed	PHYKPL (-165552)
unnamed	COL23A1 (+39243)
unnamed	FLT4 (+8849)
unnamed	MGAT1 (+23366)
unnamed	MGAT1 (-15021)
unnamed	DUSP22 (-105097)
unnamed	DUSP22 (+5953)
unnamed	IRF4 (-33451)
unnamed	IRF4 (+53586)
unnamed	IRF4 (+82774)
unnamed	FOXC1 (-55318)
unnamed	FOXC1 (+25182)
unnamed	FOXC1 (+47157)
unnamed	FOXC1 (+92019)
unnamed	FOXC1 (+122707)
unnamed	FOXC1 (+169769)
unnamed	FOXC1 (+261532)
unnamed	FOXC1 (+275307)
unnamed	FOXC1 (+294082)
unnamed	FOXC1 (+304694)
unnamed	MYLK4 (+3987)
unnamed	CDYL (-315744)
unnamed	RREB1 (-250816)
unnamed	RREB1 (-221716)
unnamed	RREB1 (-180041)
unnamed	RREB1 (+38784)
unnamed	RIOK1 (+56734)
unnamed	EEF1E1 (-78752)
unnamed	SLC35B3 (+157303)
unnamed	OFCC1 (-159923)
unnamed	TFAP2A (+31607)
unnamed	TFAP2A (-6455)
unnamed	TMEM170B (-112161)
unnamed	HIVEP1 (-93121)
unnamed	TBC1D7 (-23931)
unnamed	GFOD1 (+60262)
unnamed	MYLIP (-176668)
unnamed	GPX5 (+17486)
unnamed	MAPK13 (-7935)
unnamed	COX6A1P2 (+13193)
unnamed	GLP1R (+27151)
unnamed	KCNK5 (+10651)
unnamed	LRFN2 (-53459)
unnamed	FOXP4 (-75951)
unnamed	CCND3 (-23689)
unnamed	UBR2 (-16275)
unnamed	TTBK1 (+7920)
unnamed	MRPS18A (-11510)
unnamed	VEGFA (-10194)
unnamed	VEGFA (+35344)
unnamed	VEGFA (+65681)
unnamed	VEGFA (+110056)
unnamed	TMEM63B (-174801)
unnamed	TMEM63B (-157876)
unnamed	SLC29A1 (-21688)
unnamed	CDC5L (+343538)
unnamed	TRAM2 (-18662)
unnamed	TRAM2 (-21387)
unnamed	GCLC (+17677)
unnamed	GCLC (+14014)
unnamed	TMEM30A (-90066)
unnamed	HTR1B (+94777)
unnamed	NT5E (-46359)
unnamed	BACH2 (-108089)
unnamed	POU3F2 (-117767)
unnamed	LIN28B (-3698)
unnamed	SOBP (+164938)
unnamed	FOXO3 (+155944)
unnamed	RFPL4B (+532831)
unnamed	HDDC2 (-61306)
unnamed	HEY2 (-164438)
unnamed	OLIG3 (+79468)
unnamed	OLIG3 (+5731)
unnamed	UTRN (-25940)
unnamed	TAB2 (-261275)
unnamed	IYD (+84285)
unnamed	MTHFD1L (+179440)
unnamed	AKAP12 (-96684)
unnamed	AKAP12 (-91996)
unnamed	AKAP12 (-79659)
unnamed	ARID1B (-57413)
unnamed	ARID1B (+62687)
unnamed	ZDHHC14 (+216448)
unnamed	FNDC1 (+252834)
unnamed	SOD2 (+160835)
unnamed	MAS1 (-18924)
unnamed	AGPAT4 (+18355)
unnamed	QKI (+216025)
unnamed	RPS6KA2 (+226464)
unnamed	CCR6 (-7282)
unnamed	SMOC2 (+14157)
unnamed	DLL1 (+172761)
unnamed	FAM20C (+146144)
unnamed	PDGFA (-21932)
unnamed	UNCX (+28270)
unnamed	UNCX (+108945)
unnamed	MICALL2 (+105463)
unnamed	LFNG (-49676)
unnamed	LFNG (-30613)
unnamed	GNA12 (+19270)
unnamed	GNA12 (-29167)
unnamed	SDK1 (+622320)
unnamed	ARL4A (+329277)
unnamed	TWIST1 (+10182)
unnamed	DFNA5 (-54968)
unnamed	NFE2L3 (-293635)
unnamed	PRR15 (-105464)
unnamed	AQP1 (+21443)
unnamed	HERPUD2 (+213157)
unnamed	ELMO1 (+125789)
unnamed	EPDR1 (+27312)
unnamed	POU6F2 (+208802)
unnamed	GLI3 (-100888)
unnamed	GLI3 (-217826)
unnamed	C7orf69 (-71851)
unnamed	IKZF1 (+7007)
unnamed	COBL (-771704)
unnamed	EGFR (-14156)
unnamed	EGFR (+34919)
unnamed	WBSCR17 (+311070)
unnamed	FKBP6 (+22362)
unnamed	WBSCR28 (+8924)
unnamed	WBSCR28 (+26311)
unnamed	WBSCR28 (+31674)
unnamed	WBSCR28 (+59524)
unnamed	CDK14 (-31287)
unnamed	COL1A2 (-93310)
unnamed	SMURF1 (+6923)
unnamed	SERPINE1 (-5082)
unnamed	MYL10 (+27213)
unnamed	CUX1 (-74041)
unnamed	LMOD2 (-11561)
unnamed	LRRC4 (-85965)
unnamed	LRRC4 (-91490)
unnamed	IMPDH1 (+21593)
unnamed	PODXL (+14828)
unnamed	PODXL (-12359)
unnamed	PODXL (-70759)
unnamed	BPGM (+64042)
unnamed	AKR1D1 (+95390)
unnamed	HIPK2 (+111017)
unnamed	ZYX (-5460)
unnamed	PRKAG2 (+53722)
unnamed	ACTR3B (+541629)
unnamed	EN2 (+25576)
unnamed	EN2 (+31814)
unnamed	EN2 (+36201)
unnamed	SHH (-21033)
unnamed	SHH (-804496), C7orf13 (+23885)
unnamed	UBE3C (-60607)
unnamed	ESYT2 (+10881)
unnamed	CLN8 (-112203)
unnamed	MYOM2 (+219270)
unnamed	ENSG00000182319 (-81042)
unnamed	BLK (+24478)
unnamed	GATA4 (-88925)
unnamed	GATA4 (-72938)
unnamed	MTMR7 (+77273)
unnamed	PSD3 (+165946)
unnamed	SH2D4A (-135953)
unnamed	ENTPD4 (+5633)
unnamed	NKX3-1 (-8235)
unnamed	NKX2-6 (-8139)
unnamed	CDCA2 (+186400)
unnamed	DPYSL2 (+18466)
unnamed	ESCO2 (-46103)
unnamed	EXTL3 (-90769)
unnamed	DUSP4 (-273353)
unnamed	RBPMS (+117598)
unnamed	NRG1 (+379972)
unnamed	TACC1 (-136322)
unnamed	PLEKHA2 (+12935)
unnamed	PLEKHA2 (+23235)
unnamed	NKX6-3 (-106960)
unnamed	ANK1 (+68092)
unnamed	SMIM19 (-64698)
unnamed	CHRNB3 (-67974)
unnamed	UBE2V2 (+265878)
unnamed	EFCAB1 (+192041)
unnamed	SNAI2 (+22811)
unnamed	CLVS1 (-250589)
unnamed	XKR9 (+285238)
unnamed	EYA1 (-194208)
unnamed	HEY1 (-50333)
unnamed	CDH17 (-25523)
unnamed	PTDSS1 (+77482)
unnamed	SDC2 (+32171)
unnamed	MATN2 (+45145)
unnamed	MATN2 (+55920)
unnamed	RPL30 (+34529)
unnamed	KCNS2 (-44400)
unnamed	PABPC1 (-87860)
unnamed	YWHAZ (-74639)
unnamed	KLF10 (-90795)
unnamed	ANGPT1 (+10988)
unnamed	SLC30A8 (-72704)
unnamed	EXT1 (+153629)
unnamed	EXT1 (+99404)
unnamed	ENPP2 (-19268)
unnamed	TMEM65 (+109895)
unnamed	TRIB1 (+15175)
unnamed	TRIB1 (+82575)
unnamed	TRIB1 (+211462)
unnamed	LY6D (-12005)
unnamed	GLDC (+12750)
unnamed	C9orf123 (-951046)
unnamed	MPDZ (-234525)
unnamed	PSIP1 (-546983)
unnamed	PSIP1 (-559358)
unnamed	PSIP1 (-592183)
unnamed	BNC2 (+560766)
unnamed	BNC2 (+551016)
unnamed	BNC2 (+541216)
unnamed	BNC2 (+355416)
unnamed	ACER2 (+63018)
unnamed	AQP7 (+24767)
unnamed	AQP3 (-5416)
unnamed	RUSC2 (-19929)
unnamed	PAX5 (+208103)
unnamed	PAX5 (+174690)
unnamed	PAX5 (+8040)
unnamed	PAX5 (+4115)
unnamed	IGFBPL1 (-252881)
unnamed	GCNT1 (+31356)
unnamed	SLC28A3 (+158585)
unnamed	SPIN1 (-130834)
unnamed	BICD2 (+17081)
unnamed	BARX1 (+54891)
unnamed	C9orf3 (+215009)
unnamed	PTCH1 (-76470)
unnamed	ERCC6L2 (-122220)
unnamed	ERCC6L2 (-56183)
unnamed	ERCC6L2 (+174517)
unnamed	ERCC6L2 (+211017)
unnamed	HSD17B3 (+175909)
unnamed	HSD17B3 (+162509)
unnamed	HSD17B3 (+133209)
unnamed	NANS (-21608)
unnamed	TBC1D2 (-125135)
unnamed	GABBR2 (+206866)
unnamed	ALG2 (+51938)
unnamed	RAD23B (-35135)
unnamed	EPB41L4B (+7019)
unnamed	TXN (+141307)
unnamed	ZNF618 (+71976)
unnamed	AMBP (+40164)
unnamed	KIF12 (-19026)
unnamed	KIF12 (-25538)
unnamed	C9orf91 (+42064)
unnamed	PAPPA-AS1 (+121010)
unnamed	PAPPA-AS1 (+76960)
unnamed	PAPPA-AS1 (-65503)
unnamed	PAPPA-AS1 (-76465)
unnamed	PAPPA-AS1 (-82378)
unnamed	PAPPA-AS1 (-92940)
unnamed	DBC1 (-594343)
unnamed	CRB2 (-31814)
unnamed	NEK6 (-15729)
unnamed	PBX3 (+241096)
unnamed	PBX3 (+248346)
unnamed	LMX1B (-31397)
unnamed	LMX1B (-26697)
unnamed	LMX1B (-9222)
unnamed	LMX1B (+36978)
unnamed	LMX1B (+53278)
unnamed	ENG (-9015)
unnamed	NAIF1 (+16025)
unnamed	PRRX2 (+11118)
unnamed	FUBP3 (-52393)
unnamed	QRFP (-13425)
unnamed	LAMC3 (-22406)
unnamed	LAMC3 (-9706)
unnamed	PPAPDC3 (+29482)
unnamed	TTF1 (-8341)
unnamed	TTF1 (-17929)
unnamed	TTF1 (-50929)
unnamed	BARHL1 (-72159)
unnamed	AK8 (+9089)
unnamed	GTF3C5 (-27053)
unnamed	COL5A1 (+20355)
unnamed	LHX3 (+32079)
unnamed	QSOX2 (-8588)
unnamed	SHROOM2 (+71967)
unnamed	MID1 (-133951)
unnamed	BCOR (+201218)
unnamed	BCOR (-200882)
unnamed	USP9X (-67463)
unnamed	BMP15 (+91966)
unnamed	LAS1L (-47014)
unnamed	STARD8 (+38378)
unnamed	STARD8 (+62090)
unnamed	PJA1 (+95114)
unnamed	PJA1 (-30686)
unnamed	FAM155B (+50891)
unnamed	CXCR3 (-4315)
unnamed	PIN4 (-224966)
unnamed	PIN4 (-99616)
unnamed	TCEAL4 (-30786)
unnamed	TSC22D3 (+45042)
unnamed	APLN (+32058)
unnamed	SASH3 (-2522)
unnamed	ZDHHC9 (+3422)
unnamed	ELF4 (+25932)

## Sheet: Antibodies
Antibody	Source	concentration	Antigen retrieval	cell specificity
Rb-Pax6	Millipore (AB2237)	1/1000	yes	dorsal progenitors
Gt-MCM2	SCBT (Ssc-9839)	1/200	yes	G1 phase
Ms-4A4	MBL (D095-3)	1/50	yes	M phase
Gt-Pou3f2 (Brn2)	SCBT (sc-6029)	1/200	yes	upper layer neurons
MTF1 (Myt1)	SIGMA (HPA006303)	1/250	yes	post-mitotic neurons
Ms-Ki67	BD Pharmingen (550609)	1/50	yes	S-M phase
Ms-Blbp	Abcam (ab27171)	1/1000	not necessary	radial glia
Gt-Sox2	SCBT (sc-17320)	1/250	yes	stem cells/progenitors
Rb-pH3	Millipore/Upstate (07-424)	1/300	not necessary	M phase
Rt-CTIP2	Abcam (ab18465	1/1000	yes	depends on age
Rb-Tbr1	Abcam (ab31940)	1/500	yes	deep layer neurons
Rb-CDP (M222; Cux1)	SCBT (sc-13024)	1/100	yes	upper layer neurons
Chk-V5	Abcam (ab9113)	1/200	not necessary	v5-tag

## Sheet: HRG-2way
Human	Mouse	hgnc_symbol	Hu_DNM1	Hu_DNM2	Hu_NGN1	Hu_NGN2	HRG14W_DM1	HRG14W_DM2	HRG14W_DM3	HRG14W_PM1	HRG14W_PM2	HRG14W_PM3	HRG-PM Avg	HRG-DM Avg	FoldChange
ENSG00000000003	ENSMUSG00000067377	TSPAN6	36.2881	40.9322	41.3584	49.2191	15.7366	14.4125	16.8237	9.82821	9.90768	8.86424	10.5334	16.6576	0.661212
ENSG00000000005	ENSMUSG00000031250	TNMD	0.019976	0.004456	0.019076	0.031073	0	0.063013	0	0	0	0.037955	1.01265	1.021	0.011851
ENSG00000000419	ENSMUSG00000078919	DPM1	15.1847	14.4807	14.8122	18.8079	8.0677	10.9132	8.48111	13.152	11.0837	10.186	12.4739	10.154	-0.296864
ENSG00000000457	ENSMUSG00000026584	SCYL3	4.19857	4.15938	4.10327	4.16795	2.49319	2.57972	2.42482	2.26293	2.5519	2.64193	3.48559	3.49924	0.00564053
ENSG00000000460	ENSMUSG00000041406	C1orf112	4.00677	3.64211	3.69479	3.63495	1.61553	2.04777	1.74914	2.27094	2.26697	2.10339	3.21376	2.80415	-0.196702
ENSG00000000938	ENSMUSG00000028874	FGR	0.04842	0.050972	0.079565	0.032402	0.000284	0.003602	0	0	0	0.023453	1.00782	1.0013	-0.00936709
ENSG00000001036	ENSMUSG00000019810	FUCA2	20.8664	22.3427	29.5434	26.0254	15.6671	17.3589	17.6569	14.99	15.5317	15.9731	16.4983	17.8943	0.117185
ENSG00000001084	ENSMUSG00000032350	GCLC	2.75141	2.74566	3.17266	2.9712	1.09421	1.22395	1.82828	1.73057	1.59354	1.52936	2.61782	2.38215	-0.136105
ENSG00000001460	ENSMUSG00000028801	STPG1	0.085166	0.115256	0.119277	0.099254	0.149846	0.200313	0.202091	0.068956	0.09871	0.090393	1.08602	1.18408	0.12472
ENSG00000001461	ENSMUSG00000028803	NIPAL3	2.4857	2.99051	2.99126	3.23867	1.84631	1.49893	1.71008	0.787056	0.725916	0.865017	1.79266	2.6851	0.582874
ENSG00000001497	ENSMUSG00000057421	LAS1L	6.19261	5.52655	5.82878	5.27328	8.92768	8.05784	8.18115	9.55809	10.2956	11.0591	11.3043	9.38889	-0.267842
ENSG00000001561	ENSMUSG00000023961	ENPP4	1.36832	1.45444	1.94109	1.9732	0.649958	0.349001	0.575796	0.450159	0.413787	0.340218	1.40139	1.52492	0.121876
ENSG00000109846	ENSMUSG00000032060	CRYAB	1.41575	1.75715	1.40253	2.52913	663.614	788.654	731.242	2.40359	1.91158	1.84474	3.0533	728.837	7.89908
ENSG00000001629	ENSMUSG00000040351	ANKIB1	16.1719	17.3772	18.9831	17.9087	9.56336	9.01936	10.3788	9.5815	10.0077	9.99414	10.8611	10.6538	-0.0277992
ENSG00000001631	ENSMUSG00000000600	KRIT1	6.06057	5.9004	5.67739	5.81577	2.73201	2.68381	2.69191	3.55397	3.0335	3.60058	4.39602	3.70258	-0.247667
ENSG00000002016	ENSMUSG00000030166	RAD52	3.49673	3.92814	3.5553	3.50663	3.12294	2.054	2.45907	3.01242	3.61946	3.79065	4.47418	3.54534	-0.3357
ENSG00000002330	ENSMUSG00000024959	BAD	11.8719	14.8867	11.5983	14.8599	35.4087	42.6842	38.0259	33.0037	30.4834	30.4848	32.324	39.7062	0.296761
ENSG00000002549	ENSMUSG00000039682	LAP3	18.2901	22.8662	42.3959	27.6057	12.2595	12.4132	12.9785	16.1618	15.9535	15.4446	16.8533	13.5504	-0.314694
ENSG00000002587	ENSMUSG00000051022	HS3ST1	0.019692	0.070279	0.060176	0.027569	0.653736	0.599782	0.630061	0.304767	0.372167	0.322841	1.33326	1.62786	0.28802
ENSG00000002745	ENSMUSG00000029671	WNT16	0.04438	0.005673	0.018836	0.015341	0	0.085553	0.008497	0.024276	0.025745	0.04997	1.03333	1.03135	-0.00276752
ENSG00000002746	ENSMUSG00000021301	HECW1	0.39657	0.372519	0.347656	0.200411	0.365856	0.325761	0.310379	0.908022	0.947362	0.954825	1.93674	1.334	-0.53787
ENSG00000002822	ENSMUSG00000029554	MAD1L1	3.17673	3.16048	3.0592	3.07916	6.27086	6.93021	5.55166	9.24956	8.63468	8.10161	9.66195	7.25091	-0.414152
ENSG00000002834	ENSMUSG00000038366	LASP1	24.3687	23.5502	22.2047	25.2092	52.6345	52.8279	56.4378	55.5054	52.1262	54.2901	54.9739	54.9667	-0.000189156
ENSG00000002919	ENSMUSG00000020876	SNX11	4.19908	4.18461	5.05226	5.15538	6.29689	5.31266	7.1351	6.23317	5.75683	6.04116	7.01039	7.24821	0.0481311
ENSG00000003056	ENSMUSG00000007458	M6PR	38.7421	41.6769	54.2573	49.1787	32.2944	32.5889	33.1607	25.6208	25.069	26.022	26.5706	33.6813	0.342119
ENSG00000118523	ENSMUSG00000019997	CTGF	1.36694	1.43309	0.76131	1.33707	193.685	214.763	208.594	0.516142	0.279964	0.426714	1.40761	206.681	7.19802
ENSG00000003137	ENSMUSG00000063415	CYP26B1	0.141085	0.09727	0.202095	0.220088	0.059851	0.131491	0.013692	0.063142	0.130576	0.19902	1.13091	1.06834	-0.0821104
ENSG00000003147	ENSMUSG00000062995	ICA1	0.804898	0.850964	1.10521	0.892443	0.685547	0.71206	0.472572	0.957007	1.20829	1.04822	2.07117	1.62339	-0.351436
ENSG00000159251	ENSMUSG00000068614	ACTC1	0.027731	0.024742	0.049653	0.026961	86.0793	93.7057	82.9438	0.078925	0.019907	0.004391	1.03441	88.5763	6.42004
ENSG00000003393	ENSMUSG00000026024	ALS2	5.87796	5.64041	5.62866	5.3888	10.4012	10.5582	11.111	5.47301	5.43776	6.42081	6.77719	11.6901	0.786531
ENSG00000003436	ENSMUSG00000027082	TFPI	23.888	26.4567	18.7198	29.4665	1.00663	1.01711	1.10787	3.08233	2.77832	2.99914	3.95326	2.04387	-0.951741
ENSG00000003509	ENSMUSG00000024082	NDUFAF7	5.21864	6.00466	4.93558	5.59834	3.01043	3.2945	3.47408	3.40932	3.71675	3.78148	4.63585	4.25967	-0.122093
ENSG00000003756	ENSMUSG00000032580	RBM5	20.1078	19.1787	18.8763	17.1533	15.8684	15.2582	13.8883	14.1743	14.1313	15.5034	15.603	16.005	0.0366976
ENSG00000003987	ENSMUSG00000039431	MTMR7	0.797348	0.608366	0.764271	0.734879	0.185504	0.182337	0.189979	0.418178	0.36167	0.435334	1.40506	1.18594	-0.244601
ENSG00000003989	ENSMUSG00000031596	SLC7A2	1.54103	1.37683	1.28055	1.33024	1.50818	1.32145	1.67338	2.17301	2.09129	2.25913	3.17448	2.501	-0.344012
ENSG00000004059	ENSMUSG00000020440	ARF5	35.9763	39.8677	34.9592	45.9336	64.8841	68.6536	64.5149	75.0191	75.7599	70.486	74.755	67.0175	-0.157632
ENSG00000004139	ENSMUSG00000050132	SARM1	8.13011	8.32719	7.48237	7.27207	11.3963	11.0569	10.073	16.746	16.7131	16.5654	17.6748	11.8421	-0.577776
ENSG00000148677	ENSMUSG00000024803	ANKRD1	0.016251	0.028999	0.011741	0	67.2825	67.7878	75.3282	0.004408	0	0	1.00147	71.1328	6.15033
ENSG00000004455	ENSMUSG00000028792	AK2	7.78014	8.30831	8.27026	9.55013	8.07452	7.79508	7.91544	9.40204	8.99054	9.64716	10.3466	8.92835	-0.212689
ENSG00000004468	ENSMUSG00000029084	CD38	2.11	2.1811	1.76737	2.12547	0.530069	0.8425	0.548161	0.186891	0.118378	0.14592	1.1504	1.64024	0.511779
ENSG00000004478	ENSMUSG00000030357	FKBP4	10.0163	9.54611	10.5296	11.4032	20.724	18.4791	17.9981	28.635	29.6195	26.8342	29.3629	20.0671	-0.549164
ENSG00000004487	ENSMUSG00000036940	KDM1A	37.8294	37.0294	32.4369	39.1965	25.8175	29.0548	28.1859	39.0621	37.0704	39.0127	39.3817	28.6861	-0.457176
ENSG00000004534	ENSMUSG00000032582	RBM6	21.5077	19.4233	19.0207	19.7754	14.3767	13.7771	12.608	15.1454	15.4957	17.2771	16.9727	14.5873	-0.218507
ENSG00000004660	ENSMUSG00000020785	CAMKK1	0.588728	0.617176	0.511096	0.467607	1.49298	1.42862	1.8676	2.27537	2.27054	2.355	3.3003	2.5964	-0.346085
ENSG00000004700	ENSMUSG00000030243	RECQL	12.6116	12.8603	13.8982	15.1996	8.21928	6.64791	7.18537	8.84429	8.48002	8.71091	9.67841	8.35085	-0.212846
ENSG00000004766	ENSMUSG00000001376	VPS50	4.5589	4.61492	4.68596	5.05683	1.87969	2.01088	2.11533	2.14168	2.05114	2.29431	3.16238	3.00197	-0.0751011
ENSG00000004776	ENSMUSG00000036854	HSPB6	0.659945	0.616555	0.757997	0.754785	0.597614	0.742533	0.704485	0.725803	0.769727	0.839839	1.77846	1.68154	-0.080839
ENSG00000004777	ENSMUSG00000036882	ARHGAP33	29.8471	27.0783	23.8495	25.1635	24.3033	20.7613	21.9183	39.366	42.5433	45.6057	43.505	23.3276	-0.899141
ENSG00000004779	ENSMUSG00000030869	NDUFAB1	15.035	13.366	14.3813	17.4826	17.5884	20.9338	22.4292	22.1289	23.9751	24.054	24.386	21.3171	-0.19404
ENSG00000004799	ENSMUSG00000019577	PDK4	0.293991	0.321125	0.24395	0.478256	0.128845	0.284757	0.212734	0.144006	0.120463	0.218136	1.16087	1.20878	0.0583458
ENSG00000004809	ENSMUSG00000019834	SLC22A16	0	0	0	0	0.005655	0	0	0	0	0	1	1.00188	0.00271692
ENSG00000004838	ENSMUSG00000010044	ZMYND10	0.384221	0.345683	0.342268	0.373916	1.26388	0.963113	0.782192	0.490224	0.48501	0.54873	1.50799	2.00306	0.409582
ENSG00000004846	ENSMUSG00000072791	ABCB5	0.075907	0.080309	0.06522	0.077616	0.014978	0.01853	0	0.017779	0.040167	0.030255	1.0294	1.01117	-0.0257795
ENSG00000004848	ENSMUSG00000035277	ARX	88.4841	86.0493	72.5736	79.4172	54.5605	49.614	50.8182	51.1851	49.9891	46.3785	50.1843	52.6642	0.0695885
ENSG00000004864	ENSMUSG00000015112	SLC25A13	9.06053	8.76079	9.10318	9.53216	8.46083	8.75075	8.77208	9.08182	8.4001	9.16813	9.88335	9.66122	-0.0327953
ENSG00000004866	ENSMUSG00000029534	ST7	4.79403	5.16125	5.3949	6.05632	1.37335	1.83864	1.85276	2.64426	2.70428	2.73096	3.69317	2.68825	-0.458191
ENSG00000004897	ENSMUSG00000020687	CDC27	10.4268	10.0741	10.0325	10.4134	5.64871	5.84591	5.30453	5.32301	4.74273	5.30631	6.12401	6.59972	0.107927
ENSG00000004939	ENSMUSG00000006574	SLC4A1	0.006083	0	0	0.004731	0	0	0	0.003743	0.019055	0	1.0076	1	-0.0109221
ENSG00000004948	ENSMUSG00000023964	CALCR	0	0	0	0.006198	0	0	0	0	0	0	1	1	0
ENSG00000004961	ENSMUSG00000031352	HCCS	4.29631	4.37917	5.07144	6.00753	6.37903	6.39367	6.83997	5.04157	5.05925	4.14785	5.74955	7.53756	0.390647
ENSG00000004975	ENSMUSG00000020888	DVL2	12.1113	12.4492	12.317	12.1373	22.6125	20.0995	20.3367	25.1626	24.8603	27.1997	26.7409	22.0162	-0.280479
ENSG00000005007	ENSMUSG00000058301	UPF1	13.7051	13.185	13.4025	11.7536	21.6788	22.3722	21.0404	27.6888	29.3414	27.0999	29.0434	22.6971	-0.355701
ENSG00000005020	ENSMUSG00000059182	SKAP2	0.546289	0.618601	0.790172	0.710345	0.067969	0.158788	0.228062	0.462509	0.358931	0.439116	1.42019	1.15161	-0.302432
ENSG00000005022	ENSMUSG00000016319	SLC25A5	69.7224	76.4882	73.5078	88.2123	97.5884	101.812	100.075	179.997	179.216	167.293	176.502	100.825	-0.807831
ENSG00000103888	ENSMUSG00000052353	CEMIP	0.937933	0.732114	0.716297	0.717991	120.969	124.944	123.723	0.750696	1.13989	0.658078	1.84955	124.212	6.06949
ENSG00000005073	ENSMUSG00000038210	HOXA11	0	0.012438	0	0	0	0	0	0	0	0	1	1	0
ENSG00000005100	ENSMUSG00000040620	DHX33	5.62931	5.59908	5.65546	4.92713	5.89171	6.35386	6.80931	7.82682	8.39037	8.48418	9.23379	7.35163	-0.328859
ENSG00000005102	ENSMUSG00000001493	MEOX1	0	0	0	0	0	0	0	0.029244	0	0	1.00975	1	-0.0139953
ENSG00000101335	ENSMUSG00000067818	MYL9	0.160939	0.191458	0.791534	0.479834	178.506	202.817	187.705	1.8157	1.61045	2.10142	2.84252	190.676	6.06781
ENSG00000005156	ENSMUSG00000020697	LIG3	3.9276	3.52488	3.35925	3.19649	3.63205	3.02663	3.25299	4.94302	5.03023	5.02093	5.99806	4.30389	-0.478854
ENSG00000005175	ENSMUSG00000022466	RPAP3	6.14053	5.99086	5.73597	6.74946	4.04371	4.19224	4.90678	3.68658	3.75333	3.52687	4.6556	5.38091	0.208884
ENSG00000005187	ENSMUSG00000030935	ACSM3	1.41428	1.37383	1.29148	1.54747	0.344109	0.17842	0.321596	0.225807	0.227131	0.261018	1.23799	1.28137	0.0496985
ENSG00000005189	ENSMUSG00000030924		2.59507	2.25753	2.75258	2.44655	1.01994	1.54114	1.29498	2.59529	2.47325	2.36095	3.47649	2.28535	-0.605216
ENSG00000005194	ENSMUSG00000031781	CIAPIN1	9.36209	8.74684	9.33112	10.9858	14.2436	13.9978	13.287	15.3202	13.8876	13.3877	15.1985	14.8428	-0.0341618
ENSG00000005238	ENSMUSG00000036002	FAM214B	5.12136	5.17825	5.46385	5.31191	7.6643	7.20718	8.35546	6.10968	6.07604	6.09413	7.09328	8.74231	0.301561
ENSG00000005243	ENSMUSG00000018672	COPZ2	0.269436	0.290174	0.178862	0.248408	1.44646	1.0447	0.557177	0.261044	0.236121	0.339262	1.27881	2.01611	0.656774
ENSG00000005249	ENSMUSG00000002997	PRKAR2B	4.84892	4.77764	4.70256	5.53692	5.4814	6.20347	6.25864	6.32547	6.12334	6.5548	7.33454	6.98117	-0.0712371
ENSG00000005302	ENSMUSG00000031358	MSL3	3.95942	4.20479	4.0184	4.35174	2.52758	2.42894	2.64702	3.31947	3.37626	3.5556	4.41711	3.53451	-0.321592
ENSG00000005339	ENSMUSG00000022521	CREBBP	14.19	12.8001	11.9816	10.2283	8.74191	8.28032	8.12048	12.4547	13.2115	12.2979	13.6547	9.3809	-0.541598
ENSG00000005379	ENSMUSG00000034156	TSPOAP1	2.01885	1.70273	1.68654	1.57754	1.02341	0.845291	0.80351	1.81671	2.15799	2.31544	3.09671	1.89074	-0.711788
ENSG00000005381	ENSMUSG00000009350	MPO	0.00444	0	0.016959	0	0	0	0	0	0.037086	0	1.01236	1	-0.0177253
ENSG00000005436	ENSMUSG00000035125	GCFC2	3.99081	4.10449	3.99265	4.30566	2.37852	2.27377	2.40588	2.38197	2.77501	2.46541	3.54079	3.35273	-0.0787389
ENSG00000005448	ENSMUSG00000030032	WDR54	4.88814	5.26166	5.47603	5.99312	10.2547	12.4527	8.28609	14.3909	15.278	13.1711	15.28	11.3312	-0.431348
ENSG00000005469	ENSMUSG00000003623	CROT	10.5774	12.7208	10.4273	13.5217	3.74698	2.99499	3.26932	2.939	2.4805	3.37391	3.93114	4.33709	0.141781
ENSG00000005471	ENSMUSG00000042476	ABCB4	0.378222	0.347611	0.417185	0.340199	0.100432	0.040613	0.048869	0.081869	0.087485	0.032617	1.06732	1.0633	-0.00544271
ENSG00000005483	ENSMUSG00000029004	KMT2E	21.0559	19.603	17.3364	17.507	9.92168	9.61743	10.4842	11.0246	11.5995	10.9139	12.1793	11.0078	-0.14591
ENSG00000005486	ENSMUSG00000039917	RHBDD2	39.9093	49.9422	51.6234	52.8324	69.6444	73.9302	70.2809	47.6497	48.6335	44.6476	47.9769	72.2851	0.591358
ENSG00000005513	ENSMUSG00000024176	SOX8	30.4095	28.714	23.4322	28.6633	36.8252	35.5133	37.1333	49.6515	50.0946	49.1222	50.6228	37.4906	-0.433257
ENSG00000005700	ENSMUSG00000035941	IBTK	6.94151	6.96593	7.17912	6.80345	4.21168	4.5557	4.63471	4.49782	3.91892	4.70458	5.37377	5.46737	0.0249107
ENSG00000005810	ENSMUSG00000033004	MYCBP2	8.96118	7.27126	7.8762	5.98609	4.44985	4.4514	4.57529	5.49883	6.08943	5.52501	6.70443	5.49218	-0.287735
ENSG00000005812	ENSMUSG00000022124	FBXL3	13.9744	14.277	12.8527	15.5754	7.27912	7.13738	8.07532	9.26367	8.30288	9.35942	9.97532	8.49728	-0.231363
ENSG00000005844	ENSMUSG00000030830	ITGAL	0.019877	0	0.004745	0.00773	0	0	0	0.01529	0.015566	0	1.01029	1	-0.0147628
ENSG00000005882	ENSMUSG00000038967	PDK2	7.25319	8.1018	7.60717	8.45713	14.7526	15.3863	13.7234	11.1903	11.752	11.6244	12.5223	15.6208	0.318969
ENSG00000125968	ENSMUSG00000042745	ID1	4.06903	2.88439	1.58464	3.06282	202.276	231.929	230.96	3.27444	3.28618	2.27975	3.94679	222.721	5.81842
ENSG00000005893	ENSMUSG00000016534	LAMP2	81.6204	93.3101	101.152	98.8127	28.9925	28.4599	34.5719	15.5159	14.3369	15.221	16.0246	31.6747	0.983045
ENSG00000005955	ENSMUSG00000020530	NA	5.42071	5.35009	5.39906	5.86905	5.19719	5.10034	4.97722	6.31933	6.25429	6.01604	7.19655	6.09158	-0.240489
ENSG00000005961	ENSMUSG00000034664	ITGA2B	0.387532	0.289753	0.266373	0.162579	0.212323	0.090809	0.206497	0.304976	0.512027	0.580206	1.46574	1.16988	-0.32527
ENSG00000005981	ENSMUSG00000042607	ASB4	0.006984	0.006231	0.010004	0.002716	0.011609	0	0	0.017191	0	0	1.00573	1.00387	-0.00267155
ENSG00000006007	ENSMUSG00000033917	GDE1	15.4668	17.5342	18.4068	21.0128	16.3022	18.3716	18.5432	12.6877	13.2956	12.2908	13.758	18.739	0.445776
ENSG00000006015	ENSMUSG00000058833	C19orf60	4.8183	4.96938	5.0188	4.96998	14.814	16.4612	16.4154	19.8734	20.1083	18.6101	20.5306	16.8968	-0.281022
ENSG00000006016	ENSMUSG00000007888	CRLF1	0.557848	0.605752	0.636157	0.689616	1.58117	2.1073	1.44434	0.906427	1.03262	1.42084	2.11996	2.71094	0.354754
ENSG00000006025	ENSMUSG00000038534	OSBPL7	3.19821	2.83692	2.7063	2.51769	4.49703	4.57177	3.28247	3.20279	4.15104	4.33877	4.89753	5.11709	0.0632678
ENSG00000006042	ENSMUSG00000035413	TMEM98	18.7501	21.0795	20.0559	24.222	19.8489	17.4271	19.3669	16.0864	13.9322	14.4548	15.8245	19.881	0.329232
ENSG00000006047	ENSMUSG00000018554	YBX2	0.514577	0.503799	0.337516	0.571347	0.617462	0.46683	0.36127	0.428564	0.448103	0.624099	1.50026	1.48185	-0.0178047
ENSG00000006071	ENSMUSG00000040136	ABCC8	0.067175	0.068939	0.075028	0.065874	0.083845	0.077925	0.060279	0.045738	0.068881	0.026821	1.04715	1.07402	0.0365524
ENSG00000006114	ENSMUSG00000034940	NA	6.93096	6.42108	6.57706	5.99414	4.85426	4.42553	4.74529	4.63832	4.86244	4.74901	5.74992	5.67502	-0.0189161
ENSG00000006116	ENSMUSG00000066189	CACNG3	0	0	0	0	0.192343	0.057493	0.088947	0.230725	0.150423	0.230867	1.204	1.11293	-0.113482
ENSG00000117318	ENSMUSG00000007872	ID3	6.51252	5.05676	3.7384	6.19287	312.418	315.633	298.73	5.51721	4.81061	4.36861	5.89881	309.927	5.71536
ENSG00000006125	ENSMUSG00000035152	AP2B1	47.9155	46.8113	43.391	47.8743	47.0964	46.1971	44.5013	43.8777	46.6303	47.0727	46.8602	46.9316	0.00219608
ENSG00000006128	ENSMUSG00000061762	TAC1	0	0.015199	0	0	0	0	0.087736	0.04193	0.035573	0.002626	1.02671	1.02925	0.00355863
ENSG00000006194	ENSMUSG00000022529	ZNF263	4.61918	4.58985	4.7072	4.77358	4.69349	4.42698	4.12246	5.37971	5.30067	5.83171	6.50403	5.41431	-0.264557
ENSG00000130720	ENSMUSG00000026841	FIBCD1	0.204023	0.340624	0.256403	0.215915	57.6813	58.7339	57.0587	0.439326	0.387622	0.452121	1.42636	58.8246	5.36601
ENSG00000006282	ENSMUSG00000020867	SPATA20	3.39037	4.28308	5.02518	4.00544	3.81954	3.71656	3.58451	2.21055	2.27306	1.93115	3.13825	4.70687	0.584806
ENSG00000006283	ENSMUSG00000020866	CACNA1G	1.25722	1.34333	1.62946	0.967664	0.918204	0.991479	0.91546	3.22255	2.81326	2.52038	3.85206	1.94171	-0.9883
ENSG00000026508	ENSMUSG00000005087	CD44	8.3911	9.69727	10.0607	10.4222	63.5283	65.3495	67.3549	0.820586	0.774595	0.607427	1.7342	66.4109	5.25908
ENSG00000006377	ENSMUSG00000029754	DLX6	12.2492	11.472	8.34592	12.7177	0.790388	1.137	1.08275	1.62701	1.58936	1.56915	2.59518	2.00338	-0.373397
ENSG00000006432	ENSMUSG00000042724	MAP3K9	0.290814	0.296539	0.275235	0.212051	1.57831	1.90599	1.50735	0.950401	1.07395	0.923486	1.98261	2.66388	0.426126
ENSG00000006451	ENSMUSG00000008859	RALA	13.4215	13.775	13.0726	16.6778	7.41462	8.46497	8.77994	11.5977	11.7667	10.5949	12.3197	9.21984	-0.418159
ENSG00000006453	ENSMUSG00000038859	BAIAP2L1	0.656408	0.54919	0.487238	0.391521	0.202195	0.275119	0.232094	0.192675	0.140579	0.288067	1.20711	1.23647	0.0346729
ENSG00000006459	ENSMUSG00000042599	KDM7A	4.68297	4.33737	3.7445	3.8616	2.18892	1.62858	1.97696	1.19665	1.11277	1.16631	2.15858	2.93149	0.441551
ENSG00000006530	ENSMUSG00000029916	AGK	4.02148	4.56948	4.87119	4.63614	3.47606	3.2556	2.87768	3.89432	3.97121	4.31264	5.05939	4.20311	-0.267505
ENSG00000006555	ENSMUSG00000034919	TTC22	0.005311	0	0.015217	0	0.014163	0.008377	0.015121	0.019611	0.011092	0	1.01023	1.01255	0.0033084
ENSG00000006576	ENSMUSG00000039987	PHTF2	5.79353	5.78814	5.78211	5.9513	1.40473	1.53201	1.79817	2.00813	1.90921	2.10961	3.00898	2.5783	-0.222854
ENSG00000006606	ENSMUSG00000070464	CCL26	0	0	0	0	0	0	0	0	0	0	1	1	0
ENSG00000006607	ENSMUSG00000034066	FARP2	1.57192	1.27848	1.31929	1.14933	2.09733	2.11004	1.9875	2.62724	2.67809	2.55954	3.62162	3.06496	-0.240769
ENSG00000006611	ENSMUSG00000030838	USH1C	0	0.005851	0.037576	0.0249	0.658592	0.697651	0.873793	0	0	0	1	1.74335	0.801858
ENSG00000006625	ENSMUSG00000002797	GGCT	10.573	8.44998	10.387	11.4063	14.8381	14.2528	15.3301	16.8293	14.1281	17.6823	17.2132	15.807	-0.122955
ENSG00000006634	ENSMUSG00000002297	DBF4	6.89224	6.93511	5.55175	7.51809	2.83901	2.48567	2.86814	3.9496	3.30838	4.19731	4.81843	3.73094	-0.369026
ENSG00000006638	ENSMUSG00000034881	TBXA2R	0.315446	0.22305	0.305794	0.210995	0.377544	0.333479	0.122928	0.189643	0.171333	0.25007	1.20368	1.27798	0.0864151
ENSG00000006652	ENSMUSG00000001627	IFRD1	5.00371	5.04822	5.67963	5.68636	4.11024	3.75179	4.07787	3.59548	3.9116	3.56984	4.69231	4.97997	0.0858383
ENSG00000006695	ENSMUSG00000042148	COX10	2.86934	2.71543	2.75882	3.05707	2.89385	4.1618	3.41444	4.16096	3.97388	4.62531	5.25339	4.49003	-0.226521
ENSG00000006704	ENSMUSG00000023079	GTF2IRD1	5.72605	5.2661	5.22316	5.29872	9.3159	8.46799	7.98902	8.63167	8.63558	8.26413	9.51046	9.59097	0.0121611
ENSG00000006712	ENSMUSG00000003437	PAF1	17.8743	17.0083	17.3381	20.0929	36.7812	37.9959	32.7853	40.3248	39.1888	33.3612	38.6249	36.8541	-0.0677064
ENSG00000006715	ENSMUSG00000041236	VPS41	12.5679	12.6925	13.5371	13.0353	10.4472	9.77656	10.6891	7.74544	7.76734	7.91059	8.80779	11.3043	0.360019
ENSG00000006744	ENSMUSG00000020549	ELAC2	7.39318	7.72267	8.13494	7.8723	13.7338	14.4402	14.2075	15.7369	15.9647	15.2476	16.6498	15.1272	-0.138358
ENSG00000006747	ENSMUSG00000002565	SCIN	0.025484	0	0.036544	0.030514	0.004247	0.005024	0.03174	0.011762	0.013305	0.00807	1.01105	1.01367	0.00374037
ENSG00000006788	ENSMUSG00000060180	MYH13	0	0	0	5.2e-05	0	0	0	0	0	0	1	1	0
ENSG00000006831	ENSMUSG00000030168	ADIPOR2	11.7074	13.507	14.8528	14.8625	12.3366	11.8658	13.0266	13.7861	13.3733	14.4339	14.8644	13.4096	-0.148594
ENSG00000006837	ENSMUSG00000020389	CDKL3	4.53721	4.56984	4.43806	5.36812	3.54108	4.00258	3.58449	4.5035	4.73691	4.43519	5.55853	4.70939	-0.239165
ENSG00000007001	ENSMUSG00000026839	UPP2	0.125649	0.070354	0.052273	0.044077	0.004293	0	0.053573	0.015896	0.012216	0.064987	1.03103	1.01929	-0.0165278
ENSG00000007038	ENSMUSG00000024116	PRSS21	0	0	0	0	0	0.051134	0.161516	0.045283	0	0.051333	1.03221	1.07088	0.0530713
ENSG00000007047	ENSMUSG00000030397	MARK4	6.27924	6.29431	6.35905	6.37719	14.589	14.7865	14.6117	13.2757	13.6786	13.2361	14.3968	15.6624	0.121553
ENSG00000007062	ENSMUSG00000029086	PROM1	3.91018	3.55473	4.48609	4.29511	5.78298	5.78529	5.75774	3.5514	3.30893	3.35949	4.40661	6.77533	0.620623
ENSG00000007080	ENSMUSG00000007721	CCDC124	21.1514	22.3233	20.2564	24.844	55.0199	56.8128	53.5953	59.1443	60.7026	59.1957	60.6809	56.1427	-0.112145
ENSG00000007168	ENSMUSG00000020745	PAFAH1B1	30.7002	31.1877	29.5263	31.3921	24.0547	23.1416	22.9858	29.5651	28.3181	29.3032	30.0622	24.394	-0.30142
ENSG00000007174	ENSMUSG00000056752	DNAH9	0.137048	0.159843	0.160106	0.140464	0.157004	0.225564	0.087056	0.252177	0.332239	0.200656	1.26169	1.15654	-0.125541
ENSG00000007202	ENSMUSG00000010277	KIAA0100	22.1848	19.5196	21.707	16.8002	30.1316	28.2494	28.7086	33.2828	33.286	32.4082	33.9923	30.0299	-0.17881
ENSG00000166592	ENSMUSG00000031880	RRAD	0.13173	0.268646	0.418769	0.146366	35.0146	39.2956	37.4073	0.172336	0.112986	0.065553	1.11696	38.2391	5.0974
ENSG00000007255	ENSMUSG00000002043	TRAPPC6A	4.07863	4.14611	4.75228	4.62847	15.1315	16.3111	18.7324	19.1656	17.9471	20.4735	20.1954	17.725	-0.18824
ENSG00000007264	ENSMUSG00000004933	MATK	0.023316	0.04585	0.014844	0.04836	0.04663	0.061292	0	0.25185	0.259264	0.160433	1.22385	1.03597	-0.240438
ENSG00000007312	ENSMUSG00000040592	CD79B	0	0	0	0	0	0	0	0	0	0	1	1	0
ENSG00000007314	ENSMUSG00000001027	SCN4A	0	0	0.003724	0	0	0	0	0	0.012216	0	1.00407	1	-0.00586273
ENSG00000007341	ENSMUSG00000045576	ST7L	2.52661	2.85698	3.27634	3.40923	1.8268	1.87402	1.76303	1.45339	1.36226	1.6653	2.49365	2.82129	0.178095
ENSG00000007350	ENSMUSG00000031397	TKTL1	0.229092	0.227883	0.246396	0.342657	0.011748	0.125076	0.087794	0.130133	0.207008	0.178578	1.17191	1.07487	-0.124692
ENSG00000007376	ENSMUSG00000041199	RPUSD1	4.15972	4.75997	4.31042	4.55221	19.5141	18.1227	16.5883	21.1564	20.2916	18.0969	20.8483	19.075	-0.128244
ENSG00000007384	ENSMUSG00000020282	RHBDF1	2.67259	2.62974	3.17487	2.81628	12.0441	11.5635	10.5316	7.05002	7.22466	6.69872	7.99113	12.3797	0.631509
ENSG00000007392	ENSMUSG00000024188	LUC7L	17.533	17.2157	15.988	16.9677	16.2136	16.7548	16.14	16.897	16.8841	17.4197	18.0669	17.3695	-0.0568003
ENSG00000007402	ENSMUSG00000010066	CACNA2D2	0.311903	0.197834	0.170079	0.263607	0.407343	0.309927	0.175942	0.433864	0.428662	0.567605	1.47671	1.29774	-0.186388
ENSG00000007516	ENSMUSG00000047507	BAIAP3	9.27345	10.2518	9.20405	9.00814	41.1436	37.6603	36.1764	24.1001	23.8989	24.506	25.1683	39.3268	0.643901
ENSG00000007520	ENSMUSG00000015126	TSR3	23.9124	26.3223	27.5862	28.5182	72.1572	72.2108	77.3085	88.5683	87.2505	85.9441	88.2543	74.8922	-0.236851
ENSG00000007541	ENSMUSG00000025728	PIGQ	10.6741	11.337	10.6019	10.4898	19.8202	19.0449	18.3557	19.1456	19.8961	21.533	21.1916	20.0736	-0.078192
ENSG00000007545	ENSMUSG00000038002	CRAMP1	7.36376	7.10546	6.34626	6.07838	8.6146	7.88527	8.08238	8.58494	9.98325	10.6304	10.7329	9.19408	-0.223259
ENSG00000007866	ENSMUSG00000002249	TEAD3	6.83165	6.894	6.36936	6.4863	15.5762	16.6944	15.9539	9.21456	10.0145	10.2195	10.8162	17.0748	0.658677
ENSG00000007908	ENSMUSG00000026582	SELE	0	0.006801	0.00728	0	0.06098	0.024046	0.020523	0	0	0	1	1.03518	0.0498858
ENSG00000007923	ENSMUSG00000039768	DNAJC11	9.81095	9.70316	9.29799	10.4741	14.3205	14.7703	13.5559	18.3139	17.7059	18.0533	19.0244	15.2156	-0.322298
ENSG00000007933	ENSMUSG00000026691	FMO3	0.009287	0.007087	0.010211	0.009457	0	0	0	0.007069	0.004849	0	1.00397	1	-0.00571999
ENSG00000007944	ENSMUSG00000038175	MYLIP	0.053018	0.122991	0.05063	0.156698	0.417054	0.610442	0.399975	0.284535	0.19376	0.255201	1.2445	1.47582	0.245956
ENSG00000007952	ENSMUSG00000031257	NOX1	0.176698	0.185945	0.276197	0.350279	0.092359	0.013328	0.079074	0.080059	0.040534	0.083191	1.06793	1.06159	-0.00859177
ENSG00000007968	ENSMUSG00000018983	E2F2	7.3647	7.03214	5.76549	7.11462	4.20287	4.32568	5.21812	7.3014	6.48729	7.54675	8.11182	5.58222	-0.539185
ENSG00000008018	ENSMUSG00000014769	PSMB1	22.256	24.7693	24.4457	31.0754	26.9324	28.3002	29.2216	35.9965	36.4438	32.9139	36.118	29.1514	-0.309156
ENSG00000131095	ENSMUSG00000020932	GFAP	172.881	161.4	141.252	165.854	1843.85	1847.4	1688.69	52.9881	54.0357	51.7883	53.9373	1794.32	5.056
ENSG00000008083	ENSMUSG00000038518	JARID2	9.02824	8.16161	8.29746	7.40413	4.50878	4.02051	3.98383	8.77264	8.40358	8.224	9.46674	5.17104	-0.872413
ENSG00000008086	ENSMUSG00000031292	CDKL5	1.21472	1.10878	1.0379	0.662956	1.06051	1.10381	0.930974	1.1118	1.14573	1.55551	2.27101	2.03176	-0.160604
ENSG00000008118	ENSMUSG00000016179	CAMK1G	0.310104	0.358939	0.393462	0.573028	0.723428	0.758224	0.470441	0.295831	0.338825	0.235964	1.29021	1.6507	0.355474
ENSG00000008130	ENSMUSG00000029063	NADK	10.1665	10.2868	10.0339	10.6627	22.001	20.955	20.0263	23.6053	23.1655	24.2135	24.6614	21.9941	-0.16514
ENSG00000008196	ENSMUSG00000025927	TFAP2B	0.010461	0	0.014984	0.004068	0	0	0	0.003219	0.005461	0	1.00289	1	-0.00416817
ENSG00000008197	ENSMUSG00000042596	TFAP2D	0	0	0	0	0	0	0	0.010663	0	0	1.00355	1	-0.00511873
ENSG00000008226	ENSMUSG00000038060	DLEC1	1.18734	1.16593	1.2898	1.44537	2.01833	2.1487	1.83795	1.40369	1.38399	1.42215	2.40328	3.00166	0.320758
ENSG00000008256	ENSMUSG00000018001	CYTH3	5.25679	5.02829	4.23632	4.47712	13.2495	12.045	13.5433	8.12788	8.39939	8.54791	9.3584	13.9459	0.575509
ENSG00000008277	ENSMUSG00000040537	ADAM22	6.82627	6.53334	6.37631	5.96608	1.36831	1.06542	1.36876	3.29719	3.12834	3.10311	4.17621	2.2675	-0.881095
ENSG00000008282	ENSMUSG00000020570	SYPL1	35.8896	42.1317	43.6092	49.5256	17.7992	16.5482	17.4739	9.65056	9.05394	10.7965	10.8337	18.2738	0.754252
ENSG00000008283	ENSMUSG00000019590	CYB561	0.853023	0.900545	1.16542	1.11404	1.53589	1.62368	1.59191	0.907883	0.782537	0.833866	1.84143	2.58383	0.488684
ENSG00000008294	ENSMUSG00000020859	SPAG9	47.3301	49.0017	42.8798	43.9581	20.7641	20.9579	22.0319	18.5006	19.0241	19.8151	20.1133	22.2513	0.145742
ENSG00000008300	ENSMUSG00000023473	CELSR3	9.50962	7.59869	8.07	5.64546	5.65094	4.83822	4.86052	10.0963	11.2472	10.5748	11.6394	6.11656	-0.92823
ENSG00000008323	ENSMUSG00000038167	PLEKHG6	0.017632	0.019499	0.056869	0.011744	0.136645	0.031844	0.179997	0	0.05321	0.010192	1.02113	1.11616	0.128374
ENSG00000008324	ENSMUSG00000032526	SS18L2	7.20528	8.02459	8.11898	9.01594	5.35085	4.59049	6.90637	6.95098	5.66224	6.75968	7.45763	6.6159	-0.17278
ENSG00000008382	ENSMUSG00000003199	MPND	5.11006	4.23519	4.3594	5.18145	16.9682	16.8769	18.174	18.608	17.3334	17.8546	18.932	18.3397	-0.0458551
ENSG00000008394	ENSMUSG00000008540	MGST1	0.191223	0.270029	0.546606	0.341297	0.15686	0.119986	0.114518	0.211407	0.173478	0.142563	1.17582	1.13045	-0.0567592
ENSG00000008405	ENSMUSG00000020038	CRY1	13.4325	13.0322	13.0623	15.9028	7.28549	6.92726	8.60314	7.41968	7.78525	7.02941	8.41145	8.6053	0.0328711
ENSG00000008438	ENSMUSG00000030413	PGLYRP1	0.057892	0.078135	0.031431	0.093025	0.239195	0.241482	0.006902	0.160586	0.093588	0.117628	1.12393	1.16253	0.0487061
ENSG00000008441	ENSMUSG00000001911	NFIX	60.8909	57.4218	53.3371	52.3567	104.733	92.6021	104.958	76.2158	69.6267	73.1699	74.0041	101.765	0.459557
ENSG00000008513	ENSMUSG00000013846	ST3GAL1	1.55739	1.36671	1.08674	1.33289	4.77441	4.01613	4.53473	1.87517	1.82633	1.78518	2.82889	5.44176	0.943835
ENSG00000008516	ENSMUSG00000023903	MMP25	0.340813	0.292781	0.265668	0.230894	0.991443	0.924803	0.796509	1.16477	1.0881	1.25754	2.17014	1.90425	-0.188563
ENSG00000008710	ENSMUSG00000032855	PKD1	16.1129	12.6231	12.6445	8.20422	25.8333	21.4905	22.1	27.2597	31.1995	31.5773	31.0122	24.1413	-0.361332
ENSG00000132470	ENSMUSG00000020758	ITGB4	5.05936	5.54461	7.91583	4.40148	45.7553	45.2204	36.6476	0.355159	0.319697	0.41425	1.36304	43.5411	4.99748
ENSG00000008838	ENSMUSG00000017210	MED24	18.6773	18.3969	19.5319	18.0839	19.7963	21.0119	18.9773	30.5632	30.6613	29.3762	31.2002	20.9285	-0.576089
ENSG00000008853	ENSMUSG00000022075	RHOBTB2	6.81957	6.60308	8.14933	5.84558	24.196	23.3564	25.1268	20.2379	19.7288	19.6921	20.8863	25.2264	0.272379
ENSG00000008869	ENSMUSG00000039414	HEATR5B	6.00589	5.25551	5.09553	4.7551	2.49247	2.86343	2.89845	3.64065	3.6523	3.53528	4.60941	3.75145	-0.297135
ENSG00000008952	ENSMUSG00000027706	SEC62	28.841	30.0369	28.1173	36.5181	11.3393	11.1437	12.7938	10.7321	10.0129	9.54443	11.0965	12.7589	0.201405
ENSG00000009307	ENSMUSG00000068823	CSDE1	70.0054	65.4403	60.237	71.6685	55.3089	55.9593	58.984	65.3718	64.6491	64.9316	65.9842	57.7507	-0.192281
ENSG00000009335	ENSMUSG00000039000	UBE3C	5.97043	5.8382	5.70134	5.54937	7.8574	8.05194	7.89807	7.23069	7.15489	7.16478	8.18345	8.9358	0.126888
ENSG00000009413	ENSMUSG00000019841	REV3L	14.6622	12.5105	12.6268	10.81	3.75723	3.63556	3.96876	6.45507	6.9045	6.75611	7.70523	4.78718	-0.68666
ENSG00000009694	ENSMUSG00000016150	TENM1	1.51982	1.39834	1.206	1.03961	0.231774	0.199025	0.138115	0.905303	0.987641	0.919261	1.9374	1.18964	-0.7036
ENSG00000009709	ENSMUSG00000028736	PAX7	0.015283	0.004545	0.00973	0.019811	0.01698	0.03214	0	0.00627	0.00266	0	1.00298	1.01637	0.0191424
ENSG00000009724	ENSMUSG00000028979	MASP2	1.49687	1.81063	1.26746	1.20345	0.540803	0.573821	0.420976	0.61632	0.759145	0.817313	1.73093	1.51187	-0.195213
ENSG00000009765	ENSMUSG00000019762	IYD	0.000653	0.002769	0	0	0	0	0	0	0	0	1	1	0
ENSG00000009780	ENSMUSG00000028878	FAM76A	3.01181	3.49704	3.24775	3.34687	1.94996	1.4449	1.99652	2.87034	2.16658	2.80664	3.61452	2.79713	-0.369859
ENSG00000009790	ENSMUSG00000037318	TRAF3IP3	0.123054	0.104946	0.110865	0.092121	0.134736	0.075068	0.106885	0.105047	0.099352	0.1394	1.1146	1.10556	-0.0117444
ENSG00000009830	ENSMUSG00000034126	POMT2	7.55274	7.68555	8.9941	7.58756	5.8836	6.53747	6.4565	9.32648	9.3515	9.653	10.4437	7.29252	-0.518138
ENSG00000009844	ENSMUSG00000019868	VTA1	19.7874	20.7113	20.9737	25.9895	11.6266	12.0065	13.1659	13.1133	13.4722	13.4629	14.3495	13.2663	-0.113231
ENSG00000009950	ENSMUSG00000005373	MLXIPL	0.006679	0.011488	0	0	0	0.010535	0	0.019091	0.038359	0.025382	1.02761	1.00351	-0.0342364
ENSG00000009954	ENSMUSG00000002748	BAZ1B	25.1716	21.8338	22.8227	20.7229	22.574	20.5846	24.6967	27.4015	26.1449	27.3455	27.964	23.6184	-0.243656
ENSG00000010017	ENSMUSG00000038546	RANBP9	20.1199	20.2348	18.2332	21.7183	18.3329	20.6364	17.8652	17.3556	17.3955	17.4258	18.3923	19.9448	0.116913
ENSG00000010072	ENSMUSG00000031986	SPRTN	2.7811	3.06657	2.96509	3.43593	2.29876	2.7002	2.40586	2.16312	2.15175	2.33586	3.21691	3.46828	0.108542
ENSG00000010165	ENSMUSG00000026694	METTL13	6.59152	6.09942	7.00119	5.98007	12.3238	13.1674	10.7496	13.3559	13.3863	12.7961	14.1794	13.0803	-0.116407
ENSG00000010219	ENSMUSG00000030345	DYRK4	1.62285	1.72375	1.81931	2.05653	1.54149	1.72866	1.82782	1.54635	1.5672	1.44456	2.51937	2.69932	0.0995359
ENSG00000010244	ENSMUSG00000017421	ZNF207	12.2374	12.6808	11.6323	12.8085	7.81328	7.47441	7.4949	8.59384	9.32997	8.93315	9.95232	8.5942	-0.21167
ENSG00000010256	ENSMUSG00000025651	UQCRC1	30.0309	31.0211	29.6188	35.2827	54.2779	56.8857	54.2299	89.6392	84.8963	77.8855	85.1403	56.1312	-0.601041
ENSG00000010270	ENSMUSG00000003062	STARD3NL	16.3013	20.2432	22.4126	26.1591	10.3629	12.3145	12.6518	9.9449	10.0302	10.3013	11.0921	12.7764	0.203945
ENSG00000010278	ENSMUSG00000030342	CD9	29.5055	27.4407	35.8904	33.2061	18.1362	14.8168	16.2662	13.4083	13.0145	12.4885	13.9704	17.4064	0.317242
ENSG00000010282	ENSMUSG00000032523	HHATL	0.201119	0.264464	0.215194	0.243234	0	0	0.007917	0.163848	0.196667	0.151668	1.17073	1.00264	-0.223603
ENSG00000010292	ENSMUSG00000038252	NCAPD2	21.5847	18.4906	16.817	17.9173	21.6605	22.4743	22.2981	28.187	27.5209	27.8287	28.8456	23.1443	-0.317691
ENSG00000010295	ENSMUSG00000038271	IFFO1	3.7783	4.29253	3.73437	3.74638	6.76393	6.70592	5.67028	7.14094	7.18576	7.88401	8.40357	7.38004	-0.187373
ENSG00000010310	ENSMUSG00000030406	GIPR	0.416246	0.191851	0.210416	0.359779	0.071299	0.166014	0.120825	0.264121	0.206749	0.44271	1.30453	1.11938	-0.220827
ENSG00000010318	ENSMUSG00000021902	PHF7	1.29309	1.17931	1.33914	1.14604	1.32893	0.865021	1.20981	1.84838	1.70257	1.98984	2.84693	2.13459	-0.415448
ENSG00000010319	ENSMUSG00000021904	SEMA3G	0.064181	0.040085	0.048024	0.069885	0.053481	0	0	0.019748	0.006702	0.020324	1.01559	1.01783	0.00317238
ENSG00000010322	ENSMUSG00000021910	NISCH	16.1334	16.2482	15.5649	13.3145	26.8604	27.0285	24.1572	23.9812	26.2834	25.6304	26.2983	27.0154	0.0388094
ENSG00000010327	ENSMUSG00000042286	STAB1	0.334164	0.334397	0.218046	0.396291	1.19641	1.53889	1.23248	1.1133	1.17257	0.897915	2.06126	2.32259	0.172209
ENSG00000010361	ENSMUSG00000011658	FUZ	9.1485	9.46319	9.47102	11.341	14.858	15.9889	16.0114	18.0084	16.9318	18.1469	18.6957	16.6194	-0.169839
ENSG00000010379	ENSMUSG00000030108	SLC6A13	0.030333	0.074426	0.076038	0.053083	0.005055	0.03478	0.145367	0.045714	0.05324	0.009606	1.03619	1.06173	0.0351384
ENSG00000010404	ENSMUSG00000035847	IDS	13.6822	14.7563	13.8367	14.246	17.7134	17.9235	19.9163	16.8983	17.149	17.6777	18.2417	19.5177	0.0975492
ENSG00000010610	ENSMUSG00000023274	CD4	0.006371	0.031306	0.056212	0.022012	0.079526	0.022136	0.084904	0.064776	0.039336	0.000292	1.0348	1.06219	0.0376862
ENSG00000010626	ENSMUSG00000030125	LRRC23	1.76286	1.89529	2.03444	2.00092	3.1802	3.69904	3.27937	2.51213	2.24084	2.79344	3.51547	4.3862	0.319256
ENSG00000010671	ENSMUSG00000031264	BTK	0.007608	0.004064	0.002868	0.005918	0	0.036948	0.05415	3.1e-05	0.015889	0	1.00531	1.03037	0.0355212
ENSG00000010704	ENSMUSG00000006611	HFE	1.15852	1.23106	1.68312	1.28466	0.78515	0.601428	0.611579	0.433656	0.522641	0.504976	1.48709	1.66605	0.163941
ENSG00000010810	ENSMUSG00000019843	FYN	38.2685	35.8619	35.4156	40.0499	25.0624	23.7477	26.5469	45.01	45.4201	44.8041	46.078	26.119	-0.818981
ENSG00000010818	ENSMUSG00000015501	HIVEP2	2.05379	2.03318	2.46052	1.83149	3.82454	3.24054	4.28414	2.64324	2.67381	2.47696	3.598	4.78307	0.410741
ENSG00000010932	ENSMUSG00000040181	FMO1	0.039073	0.025988	0.029624	0.052261	0.023995	0.014193	0	0	0.001978	0	1.00066	1.01273	0.0172977
ENSG00000011007	ENSMUSG00000028668	TCEB3	12.6438	12.1018	12.3866	12.6284	9.82205	10.6593	10.3348	13.676	12.912	12.8874	14.1585	11.272	-0.328915
ENSG00000011009	ENSMUSG00000028670	LYPLA2	12.3737	12.2276	11.9704	13.7966	25.445	26.9544	27.4167	32.2224	29.5355	27.7864	30.8481	27.6054	-0.160234
ENSG00000011021	ENSMUSG00000029016	CLCN6	21.0114	20.4085	21.1331	19.6846	8.73336	7.96466	7.53349	14.4944	15.0705	14.7877	15.7842	9.07717	-0.798166
ENSG00000175899	ENSMUSG00000030111	A2M	5.58215	6.57527	6.42532	6.4212	81.4723	79.3456	68.5844	1.6227	1.44387	1.4817	2.51609	77.4674	4.94433
ENSG00000011083	ENSMUSG00000052026	SLC6A7	0.19154	0.193984	0.246689	0.16153	0.199768	0.118447	0.120682	0.456146	0.539847	0.486649	1.49421	1.1463	-0.382403
ENSG00000011105	ENSMUSG00000030352	TSPAN9	6.68182	6.75259	6.90903	6.82841	13.0448	13.0256	13.3847	7.32894	6.55943	6.7313	7.87322	14.1517	0.845952
ENSG00000011114	ENSMUSG00000041702	BTBD7	5.59694	4.87214	4.69667	4.78854	3.7245	3.09874	3.28357	3.85951	3.44128	3.65941	4.6534	4.36894	-0.0910022
ENSG00000011132	ENSMUSG00000004931	APBA3	1.73937	2.08794	1.80409	1.6785	3.51274	2.66798	3.30298	4.1429	3.87164	4.03622	5.01692	4.16123	-0.269793
ENSG00000011143	ENSMUSG00000034121	MKS1	3.62505	3.48942	3.84608	3.8779	3.60781	3.2498	4.23228	5.35137	5.68267	6.23256	6.75553	4.69663	-0.524444
ENSG00000011198	ENSMUSG00000032540	ABHD5	3.04311	2.8347	3.00795	3.13354	2.55693	3.59242	3.25921	3.14149	3.24855	2.95795	4.116	4.13618	0.00705797
ENSG00000011258	ENSMUSG00000059474	MBTD1	11.9142	11.3564	9.89208	11.4279	3.16383	3.03706	3.19546	4.61477	4.4699	4.48546	5.52338	4.13212	-0.418669
ENSG00000011260	ENSMUSG00000054079	UTP18	7.76621	8.20461	8.12443	8.98216	11.8868	13.6025	12.2186	14.8803	15.4256	17.8563	17.054	13.5693	-0.329768
ENSG00000011275	ENSMUSG00000045078	RNF216	7.69397	7.00164	6.91801	7.0793	14.656	14.8726	16.2929	17.6305	17.237	16.548	18.1385	16.2738	-0.1565
ENSG00000011295	ENSMUSG00000042298	TTC19	8.7676	9.26982	10.3603	10.3593	9.18398	8.39436	9.33431	8.26208	8.77043	9.20972	9.74741	9.97088	0.0327026
ENSG00000011332	ENSMUSG00000030584	DPF1	4.49782	4.71915	4.02766	4.80501	5.12063	5.4013	5.36027	10.9779	10.5522	11.2744	11.9348	6.29407	-0.923112
ENSG00000011347	ENSMUSG00000024743	SYT7	4.49547	4.32279	3.41744	3.61334	0.597413	0.522132	0.584942	1.87737	1.63118	1.76548	2.75801	1.56816	-0.814553
ENSG00000011376	ENSMUSG00000035202	LARS2	11.9627	10.9022	12.3575	11.2463	11.4027	10.9837	10.5753	15.1031	14.5933	15.3606	16.019	11.9872	-0.418286
ENSG00000011405	ENSMUSG00000030660	PIK3C2A	13.9969	13.6079	12.6334	12.4821	5.46849	5.70187	5.88725	5.38798	5.44446	5.67522	6.50255	6.68587	0.0401087
ENSG00000011422	ENSMUSG00000046223	PLAUR	0.980783	1.30758	1.06445	1.36427	1.32783	1.8487	1.51715	1.61676	1.39698	1.64982	2.55452	2.56456	0.00565815
ENSG00000011426	ENSMUSG00000036777	ANLN	10.3452	9.52436	8.22951	9.60648	7.1498	7.33081	7.46882	5.37832	5.21855	5.68074	6.42587	8.31648	0.372081
ENSG00000011451	ENSMUSG00000024050	WIZ	14.4652	14.3458	13.3153	13.2103	18.2981	17.9939	17.9712	25.2937	25.6925	26.505	26.8304	19.0877	-0.491223
ENSG00000011454	ENSMUSG00000035437	RABGAP1	13.6285	14.0315	14.2235	14.1016	11.7572	10.391	11.1123	11.8753	11.6487	11.8179	12.7806	12.0868	-0.0805237
ENSG00000011465	ENSMUSG00000019929	DCN	0	0.01065	0	0	0.015914	0.040791	0	0.100388	0.081014	0.09324	1.09155	1.0189	-0.0993599
ENSG00000011478	ENSMUSG00000030407	QPCTL	1.68332	1.80666	1.88224	1.84237	6.65819	6.45326	6.13363	7.42171	7.44643	7.76016	8.54277	7.41502	-0.204252
ENSG00000011485	ENSMUSG00000003099	PPP5C	8.88337	9.40658	8.93287	8.56746	12.2051	13.2751	12.021	16.2961	14.8276	14.2389	16.1209	13.5004	-0.255927
ENSG00000011523	ENSMUSG00000044066	CEP68	8.87063	8.37907	7.2565	8.49905	6.89576	6.33707	6.55069	7.81819	8.70705	7.81223	9.11249	7.59451	-0.262889
ENSG00000011566	ENSMUSG00000024242	MAP4K3	7.70516	7.6687	6.76283	7.45067	6.28222	5.98263	6.41545	3.257	3.37512	3.72901	4.45371	7.22677	0.698342
ENSG00000011590	ENSMUSG00000006310	ZBTB32	0.034831	0.056566	0.064482	0.017882	0.042518	0.100718	0.023485	0.038638	0.037765	0.071503	1.0493	1.05557	0.00859731
ENSG00000011600	ENSMUSG00000030579	TYROBP	0	0	0	0	0	0	0	0	0	0	1	1	0
ENSG00000011638	ENSMUSG00000030917	TMEM159	2.93614	3.10338	3.27703	3.73065	3.28928	3.73528	3.59111	4.15285	3.86386	4.67458	5.23043	4.53856	-0.204695
ENSG00000011677	ENSMUSG00000031343	GABRA3	1.25777	1.43767	1.14732	1.40887	0.419233	0.498832	0.38886	0.256501	0.280608	0.490932	1.34268	1.43564	0.0965798
ENSG00000012048	ENSMUSG00000017146	BRCA1	4.51448	3.78484	3.98445	3.4401	3.08362	3.54248	3.31129	4.29575	4.43208	4.94412	5.55731	4.31246	-0.365876
ENSG00000012061	ENSMUSG00000003549	ERCC1	8.18474	8.39895	7.46909	9.0813	13.9315	15.389	13.4071	17.3444	17.7187	18.7968	18.9533	15.2425	-0.314344
ENSG00000012124	ENSMUSG00000030577	CD22	0	0	0	0	0	0.004344	0	0	0	0	1	1.00145	0.00208751
ENSG00000012211	ENSMUSG00000031145	PRICKLE3	1.45306	1.36322	1.84693	1.5152	1.8306	1.06631	1.76189	0.750325	0.559774	0.534568	1.61489	2.55293	0.660721
ENSG00000012223	ENSMUSG00000032496	LTF	0	0	0	0	0	0.017916	0	0	0	0	1	1.00597	0.00859015
ENSG00000142871	ENSMUSG00000028195	CYR61	8.52917	8.43034	9.65655	9.74249	241.758	251.953	244.427	7.90334	8.05553	6.60783	8.52223	247.046	4.85741
ENSG00000012504	ENSMUSG00000047638	NR1H4	0.027885	0.02488	0.017753	0.021688	0.024785	0	0	0.05148	0.019411	0.094192	1.05503	1.00826	-0.0654107
ENSG00000012660	ENSMUSG00000032349	ELOVL5	64.3178	68.8438	67.3872	75.9864	24.5153	26.0848	25.858	27.547	27.9749	28.0293	28.8504	26.486	-0.123359
ENSG00000012779	ENSMUSG00000025701	ALOX5	0.230418	0.193187	0.293788	0.217173	0.291054	0.089475	0.099383	0	0.045565	0	1.01519	1.15997	0.192341
ENSG00000012822	ENSMUSG00000023055	CALCOCO1	14.9761	14.9723	13.7628	15.0549	15.1917	12.9691	12.8832	11.0294	11.5761	12.8727	12.8261	14.6813	0.194905
ENSG00000012983	ENSMUSG00000034761	MAP4K5	10.5465	9.89458	9.49801	10.1053	5.92762	6.43041	6.87648	5.05351	5.07775	5.47195	6.20107	7.4115	0.257248
ENSG00000137801	ENSMUSG00000040152	THBS1	0.142134	0.141855	0.306018	0.162128	32.3579	33.0524	33.0951	0.204482	0.18466	0.266781	1.21864	33.8351	4.79518
ENSG00000013275	ENSMUSG00000030603	PSMC4	18.8694	19.653	20.078	20.7906	31.1558	29.8824	29.0403	37.2946	36.9818	35.592	37.6228	31.0262	-0.278122
ENSG00000013288	ENSMUSG00000029119	MAN2B2	8.47452	8.38578	10.284	7.66221	10.4173	11.2922	10.6404	7.23469	7.82327	7.45589	8.50462	11.7833	0.470427
ENSG00000013293	ENSMUSG00000069072	SLC7A14	0.005871	0.005238	0.011213	0	0.058706	0.060189	0.183848	0.007226	0.003065	0.02231	1.01087	1.10091	0.123109
ENSG00000013297	ENSMUSG00000037625	CLDN11	0.047007	0.048332	0.064663	0.047704	0.507438	0.52042	0.429515	0.103339	0.105311	0.188698	1.13245	1.48579	0.391785
ENSG00000183691	ENSMUSG00000048616	NOG	6.12714	8.29222	8.33656	8.36467	115.224	115.482	118.649	3.78495	3.15018	3.34182	4.42565	117.452	4.73003
ENSG00000013374	ENSMUSG00000028954	NUB1	7.2373	6.84819	7.5442	7.61518	5.20783	5.74617	5.75484	6.27032	6.39999	6.34513	7.33848	6.56961	-0.159673
ENSG00000013375	ENSMUSG00000056131	PGM3	10.0634	9.97927	9.13358	11.3065	5.65393	5.75095	5.84585	6.02787	7.05628	7.02413	7.70276	6.75024	-0.190435
ENSG00000013392	ENSMUSG00000032417	RWDD2A	3.39797	3.87092	3.79916	4.09521	3.37075	3.01617	2.93092	2.93108	3.03708	2.62863	3.8656	4.10595	0.0870232
ENSG00000013441	ENSMUSG00000026034	CLK1	28.1505	29.3558	26.1609	31.8516	5.68799	5.6876	5.65167	6.60557	6.66441	6.9909	7.75363	6.67575	-0.215941
ENSG00000013503	ENSMUSG00000034453	POLR3B	3.0983	2.55446	2.69442	2.58779	1.98659	2.42087	1.73156	2.4611	2.50866	3.08175	3.68383	3.04634	-0.274133
ENSG00000013523	ENSMUSG00000021257	ANGEL1	6.02545	6.18693	6.24437	5.12923	2.89053	3.81523	2.98576	2.90785	3.22797	3.92136	4.35239	4.23051	-0.0409775
ENSG00000013561	ENSMUSG00000060450	RNF14	5.7371	5.95166	5.93707	6.62841	6.3331	6.51928	7.55947	5.86887	5.16382	5.88849	6.64039	7.80395	0.232936
ENSG00000013563	ENSMUSG00000019088	DNASE1L1	1.19774	1.40871	2.18694	1.69124	3.76517	3.46676	3.71928	1.55178	1.50214	1.61114	2.55502	4.65041	0.864022
ENSG00000013573	ENSMUSG00000035842	DDX11	2.63428	2.5495	2.40824	2.34092	4.46675	4.24532	3.6473	6.82472	7.87113	8.5859	8.76058	5.11979	-0.774942
ENSG00000013583	ENSMUSG00000042770	HEBP1	1.1119	1.30661	1.32022	1.40569	3.51728	2.99784	2.79298	1.78995	1.50979	1.72823	2.67599	4.1027	0.6165
ENSG00000013588	ENSMUSG00000046733	GPRC5A	0.030484	0.033999	0.054583	0.035565	0.045724	0.075126	0.037968	0.028139	0.025862	0	1.018	1.05294	0.0486843
ENSG00000013619	ENSMUSG00000059401	MAMLD1	3.24452	3.19623	2.8815	2.75273	2.56018	2.04236	2.68379	4.84148	5.24041	4.92022	6.0007	3.42878	-0.807438
ENSG00000013810	ENSMUSG00000037313	TACC3	16.1553	14.0031	13.0666	14.2293	24.8031	24.6372	25.2897	27.6053	25.9984	27.3525	27.9854	25.91	-0.111166
ENSG00000014123	ENSMUSG00000040359	UFL1	9.69983	10.5003	11.8311	11.4841	3.63877	4.12626	3.07151	4.16614	3.96669	3.66867	4.93384	4.61218	-0.0972605
ENSG00000014138	ENSMUSG00000024833	POLA2	3.98165	4.00242	3.86663	4.21847	4.8378	4.98619	4.79667	9.73544	9.29723	8.83086	10.2878	5.87355	-0.808635
ENSG00000014216	ENSMUSG00000024942	CAPN1	10.4246	10.6968	9.95299	9.96641	23.4746	23.2999	21.9785	22.0767	21.8531	20.5906	22.5068	23.9177	0.0877171
ENSG00000014257	ENSMUSG00000032561	ACPP	0.00767	0.006843	0.014649	0	0	0	0.016377	0	0	0.024289	1.0081	1.00546	-0.00377926
ENSG00000014824	ENSMUSG00000029221	SLC30A9	26.7603	26.9427	25.7944	29.5968	14.2956	15.3001	16.4192	15.7361	15.8307	16.1746	16.9138	16.3383	-0.0499437
ENSG00000014914	ENSMUSG00000045934	MTMR11	4.32595	3.94036	5.00929	3.97875	4.88561	4.92542	4.9765	2.80216	3.11162	3.75514	4.22297	5.92917	0.489572
ENSG00000014919	ENSMUSG00000040018	COX15	10.542	10.8407	10.5877	10.711	7.84551	7.4332	8.32666	9.98152	9.47756	10.2337	10.8976	8.86846	-0.297255
ENSG00000015133	ENSMUSG00000021182	CCDC88C	3.70892	3.20184	3.38762	2.9303	5.96932	5.90573	5.56602	5.69669	5.84503	5.52704	6.68958	6.81369	0.0265207
ENSG00000015153	ENSMUSG00000022634	YAF2	2.78963	2.87234	2.6085	3.49072	1.16519	1.37602	1.2346	1.46035	1.36926	1.47367	2.43442	2.2586	-0.10815
ENSG00000015171	ENSMUSG00000021156	ZMYND11	24.2644	24.6624	22.8275	25.9964	19.5664	18.0053	20.0789	18.9162	19.4338	18.7588	20.0363	20.2169	0.0129457
ENSG00000015285	ENSMUSG00000031165	WAS	0.299472	0.327137	0.383403	0.29713	0.314738	0.314446	0.276381	0.329913	0.347819	0.38947	1.35573	1.30185	-0.0585054
ENSG00000015413	ENSMUSG00000019278	DPEP1	0	0	0	0	0	0	0	0	0	0	1	1	0
ENSG00000015475	ENSMUSG00000004446	BID	3.51242	3.78294	4.35094	4.96662	8.81257	9.85761	9.7045	7.2641	7.25716	6.69641	8.07256	10.4582	0.373541
ENSG00000015479	ENSMUSG00000037236	MATR3	47.9546	47.7732	43.4161	52.9645	18.0513	17.7731	19.2293	24.9538	25.381	26.6292	26.6547	19.3512	-0.461963
ENSG00000015520	ENSMUSG00000020447	NPC1L1	0.024535	0.021854	0.034355	0.033339	0	0.05312	0	0.02261	0.037312	0.025209	1.02838	1.01771	-0.0150475
ENSG00000015532	ENSMUSG00000020868	XYLT2	4.68937	5.23217	5.78746	4.67581	8.84498	8.36714	8.46949	7.9811	7.97399	7.92818	8.96109	9.56054	0.0934173
ENSG00000015676	ENSMUSG00000053838	NUDCD3	10.5228	10.1703	10.8218	10.4743	13.0546	14.2356	13.3982	15.3954	15.6594	15.6013	16.552	14.5628	-0.184722
ENSG00000016082	ENSMUSG00000042258	ISL1	0.160005	0.151683	0.097006	0.268494	0	0.031546	0	0.180651	0.041974	0.082338	1.10165	1.01052	-0.12458
ENSG00000016391	ENSMUSG00000015970	CHDH	2.64609	2.67364	2.51667	2.59095	3.49792	3.33017	4.19919	7.38298	7.38361	8.03245	8.59968	4.67576	-0.879082
ENSG00000016402	ENSMUSG00000020007	IL20RA	0.082588	0.104389	0.154751	0.123116	0.018352	0.016282	0	0.09741	0.059287	0.064408	1.0737	1.01154	-0.0860332
ENSG00000016490	ENSMUSG00000028255	CLCA1	0	0	0	0	0	0.006345	0	0	0	0.012197	1.00407	1.00212	-0.00280555
ENSG00000016864	ENSMUSG00000021916	GLT8D1	13.9523	15.1491	15.6362	18.092	11.6705	13.8074	13.0894	10.6779	11.3022	11.4886	12.1563	13.8557	0.188783
ENSG00000017260	ENSMUSG00000032570	ATP2C1	18.5302	18.5411	20.1499	20.4834	9.42366	8.53658	9.2757	8.93446	8.46683	8.88964	9.76364	10.0786	0.0458097
ENSG00000017373	ENSMUSG00000038453	NA	2.61045	2.495	2.38171	2.09923	6.03452	5.59817	5.54519	8.38777	8.29769	8.33004	9.3385	6.72596	-0.47345
ENSG00000017427	ENSMUSG00000020053	IGF1	0	0	0	0	0.074231	0.152107	0.060853	0.014684	0.055021	0.008816	1.02617	1.09573	0.0946179
ENSG00000017483	ENSMUSG00000031170	SLC38A5	0.217908	0.341414	0.561435	0.307413	0.300185	0.238323	0.116839	0.503473	0.298938	0.333282	1.37856	1.21845	-0.178121
ENSG00000017621	ENSMUSG00000031147	NA	0.09476	0.127279	0.121486	0.094622	0.283808	0.33328	0.419195	0.179913	0.197399	0.139965	1.17243	1.34543	0.198568
ENSG00000149591	ENSMUSG00000032085	TAGLN	1.05058	1.11177	1.08414	0.995082	313.702	326.436	320.587	11.5816	11.1091	11.3947	12.3618	321.242	4.6997
ENSG00000018236	ENSMUSG00000055022	CNTN1	1.03612	0.94552	0.618839	1.02449	0.145944	0.067572	0.079434	0.209836	0.248074	0.226445	1.22812	1.09765	-0.162031
ENSG00000018280	ENSMUSG00000026177	SLC11A1	0.016681	0.017451	0.028319	0.031714	0.003707	0.022886	0.04485	0.031936	0.019353	0.030521	1.02727	1.02381	-0.00486131
ENSG00000018408	ENSMUSG00000027803	WWTR1	28.2891	29.1721	26.1098	29.8188	20.1278	17.7775	18.8503	11.5408	11.4003	11.6067	12.516	19.9185	0.670343
ENSG00000018510	ENSMUSG00000042410	AGPS	5.96027	6.35029	6.78076	6.70316	3.82563	3.63518	3.88888	4.13872	3.79697	4.17504	5.03691	4.78323	-0.0745541
ENSG00000018610	ENSMUSG00000006423	CXorf56	2.74679	3.0518	3.09129	3.44514	6.42448	6.53043	5.16709	5.47998	5.93086	5.53388	6.64824	7.04066	0.0827389
ENSG00000158246	ENSMUSG00000046694	FAM46B	7.4943	8.76678	10.9729	9.0903	41.6312	43.6403	41.7174	0.735095	0.724833	0.70846	1.7228	43.3296	4.65253
ENSG00000019102	ENSMUSG00000001943	VSIG2	0.005762	0.038626	0.07958	0.027121	0.03999	0.1072	0.024397	0.084015	0.05801	0.059985	1.06734	1.0572	-0.0137729
ENSG00000019144	ENSMUSG00000048537	PHLDB1	7.56385	6.6797	6.0054	5.97072	22.7818	22.0179	21.089	12.4694	12.4341	13.0653	13.6563	22.9629	0.749741
ENSG00000019169	ENSMUSG00000026390	MARCO	0	0	0	0	0	0	0	0	0	0	1	1	0
ENSG00000019186	ENSMUSG00000038567	CYP24A1	0	0.014449	0	0.006298	0	0	0	0	0	0.003104	1.00103	1	-0.00149194
ENSG00000019485	ENSMUSG00000075028	PRDM11	0.592148	0.48133	0.704101	0.609759	2.08396	2.22653	2.36508	0.855576	0.944559	0.895691	1.89861	3.22519	0.764441
ENSG00000019505	ENSMUSG00000027220	SYT13	0.020753	0.021161	0	0.009223	0.332026	0.360052	0.206778	0.474344	0.388522	0.495707	1.45286	1.29962	-0.160805
ENSG00000019549	ENSMUSG00000022676	SNAI2	0.690573	0.603571	0.461219	0.578504	1.18847	0.843655	1.17546	0.756579	0.984019	0.687299	1.8093	2.06919	0.193638
ENSG00000146674	ENSMUSG00000020427	IGFBP3	0.067228	0.057826	0.0894	0.081214	34.1986	39.0458	40.6571	0.567232	0.526354	0.599761	1.56445	38.9672	4.63853
ENSG00000019991	ENSMUSG00000028864	HGF	1.66445	1.93708	1.95318	1.92429	0.021688	0.08267	0.07718	0.18908	0.139655	0.136522	1.15509	1.06051	-0.123238
ENSG00000019995	ENSMUSG00000030967	ZRANB1	10.9065	11.0074	9.9538	11.9973	6.98604	6.83978	7.49434	8.0689	7.86076	7.98832	8.97266	8.10672	-0.146418
ENSG00000020129	ENSMUSG00000028833	NCDN	4.65922	4.98848	5.7492	4.42118	14.6786	15.1596	15.1966	19.8494	20.7099	20.4761	21.3452	16.0116	-0.414791
ENSG00000020181	ENSMUSG00000031486	ADGRA2	0.813859	0.726198	0.795283	0.946724	1.18222	1.07061	1.27624	1.20122	0.971454	1.22775	2.13347	2.17636	0.0287102
ENSG00000020256	ENSMUSG00000027551	ZFP64	2.59291	2.45065	2.2729	2.73534	2.895	3.29454	2.74071	4.4793	4.94429	4.32683	5.58347	3.97675	-0.489574
ENSG00000020426	ENSMUSG00000021103	MNAT1	2.6022	2.63972	2.13503	2.93038	2.38699	1.84067	2.15582	2.10669	2.15594	2.48112	3.24792	3.12783	-0.0543533
ENSG00000020633	ENSMUSG00000070691	RUNX3	0	0	0	0	0	0	0.039764	0.025786	0.003646	0	1.00981	1.01325	0.004912
ENSG00000020922	ENSMUSG00000031928	MRE11A	4.55447	4.08906	3.89654	3.73598	2.17469	2.27316	2.06203	2.74526	2.3799	3.52278	3.88265	3.16996	-0.292575
ENSG00000021300	ENSMUSG00000030701	PLEKHB1	10.0839	12.8876	15.6462	14.0995	13.3056	14.1131	13.7429	13.4975	14.036	13.8791	14.8042	14.7205	-0.00817783
ENSG00000021488	ENSMUSG00000030492	SLC7A9	0.174189	0.301164	0.167899	0.252837	0.049533	0.068363	0.132205	0.131408	0.105191	0.105265	1.11395	1.08337	-0.0401685
ENSG00000021645	ENSMUSG00000066392	NRXN3	8.44239	8.11591	6.87297	6.73093	1.3658	1.66191	1.27998	2.17574	2.22828	1.98649	3.13017	2.4359	-0.361791
ENSG00000021762	ENSMUSG00000037606	OSBPL5	3.47755	3.44163	3.75928	2.75278	8.0287	8.28519	7.8109	12.5362	12.928	12.8802	13.7814	9.0416	-0.608076
ENSG00000021776	ENSMUSG00000040383	AQR	7.54043	6.93853	6.55979	6.72652	3.98167	3.78857	3.9915	4.30152	4.82684	4.68897	5.60578	4.92058	-0.188086
ENSG00000021826	ENSMUSG00000025991	CPS1	0.477303	0.395639	0.351796	0.433505	0.515252	0.507991	0.493024	0.257218	0.255622	0.259391	1.25741	1.50542	0.259713
ENSG00000021852	ENSMUSG00000029656	C8B	0.011785	0.010515	0	0	0	0	0	0	0	0	1	1	0
ENSG00000022267	ENSMUSG00000023092	FHL1	38.0515	40.0387	34.0948	45.2309	45.2757	51.8491	51.6758	33.9641	34.7052	35.8731	35.8474	50.6002	0.497274
ENSG00000022277	ENSMUSG00000027502	RTFDC1	16.6764	16.8971	16.527	20.4327	22.2548	23.1474	23.998	23.6751	23.0788	21.5613	23.7717	24.1334	0.0217841
ENSG00000022355	ENSMUSG00000010803	GABRA1	0	0	0	0	0.035121	0	0.079158	0.028818	0.003056	0	1.01062	1.03809	0.0386884
ENSG00000022567	ENSMUSG00000079020	SLC45A4	1.70932	1.51047	1.51888	1.18922	2.04403	2.06868	2.04481	3.24779	3.26201	3.27744	4.26242	3.05251	-0.481678
ENSG00000022840	ENSMUSG00000041740	RNF10	18.9274	18.2402	17.3107	19.9938	30.6064	31.8173	33.3406	30.5967	30.2379	29.3804	31.0716	32.9214	0.0834294
ENSG00000022976	ENSMUSG00000021271	ZNF839	1.95332	1.90371	2.08342	1.88378	2.20724	2.8497	2.97458	2.78992	2.82958	3.17892	3.93281	3.67717	-0.0969616
ENSG00000023041	ENSMUSG00000024982	ZDHHC6	17.252	17.969	20.2382	20.9501	8.66112	8.19491	9.23807	10.5839	8.83757	9.995	10.8055	9.69803	-0.156002
ENSG00000023171	ENSMUSG00000040111	GRAMD1B	1.30349	1.4912	1.54144	1.21016	0.7884	0.663799	0.81853	1.73936	1.81206	1.67096	2.74079	1.75691	-0.641552
ENSG00000023191	ENSMUSG00000038650	RNH1	6.80965	6.68374	6.67687	6.76808	24.2044	24.5922	23.1513	29.1779	29.2615	27.7184	29.7193	24.9827	-0.250471
ENSG00000023228	ENSMUSG00000025968	NDUFS1	14.0119	12.7226	12.8443	13.2096	16.1441	17.0335	16.0044	18.6587	17.2086	18.4722	19.1132	17.394	-0.135975
ENSG00000023287	ENSMUSG00000025907	RB1CC1	14.1569	12.4753	11.946	13.3901	8.49228	7.93638	8.39277	6.64028	6.7291	7.18999	7.85312	9.27381	0.239896
ENSG00000023318	ENSMUSG00000028343	ERP44	11.8925	12.7437	14.1021	13.792	5.73261	5.23991	5.98725	3.85407	4.24369	4.26804	5.12193	6.65325	0.377372
ENSG00000023445	ENSMUSG00000032000	BIRC3	0.114444	0.233883	0.623307	0.17943	0.150397	0.118612	0.272741	0.037022	0.018288	0.021773	1.02569	1.18058	0.202899
ENSG00000023516	ENSMUSG00000022016	AKAP11	18.4208	18.4144	18.2984	17.3614	5.70827	5.73399	6.81981	7.90293	8.17079	8.20314	9.09228	7.08736	-0.359395
ENSG00000023572	ENSMUSG00000018196	GLRX2	1.75946	1.3081	1.72205	1.77716	1.05336	1.76159	1.10407	2.53954	2.47802	1.99463	3.3374	2.30634	-0.533119
ENSG00000023608	ENSMUSG00000021113	SNAPC1	3.54541	4.18511	4.01286	4.80933	2.36511	2.94937	2.53298	2.40001	2.27643	1.92776	3.2014	3.61582	0.175621
ENSG00000023697	ENSMUSG00000030225	DERA	8.73636	8.31785	7.61237	10.0617	3.87933	4.78414	4.88866	7.0881	7.03877	7.30328	8.14338	5.51738	-0.561646
ENSG00000023734	ENSMUSG00000030224	STRAP	53.3878	50.9017	44.5015	62.9941	43.3418	46.9338	47.9121	54.9685	52.1873	57.4049	55.8536	47.0625	-0.24707
ENSG00000023839	ENSMUSG00000025194	ABCC2	0.096116	0.093876	0.073501	0.077767	0.075685	0.00407	0.080802	0.046675	0.050128	0.098118	1.06497	1.05352	-0.0156014
ENSG00000023892	ENSMUSG00000002257	DEF6	0.063357	0.079041	0.130901	0.071794	0.10841	0.014222	0.017113	0.071941	0.069046	0.091375	1.07745	1.04658	-0.0419414
ENSG00000023902	ENSMUSG00000015745	PLEKHO1	13.8791	14.0615	12.7258	15.2798	9.67617	9.36203	10.082	15.1533	14.9238	15.0718	16.0496	10.7067	-0.584024
ENSG00000023909	ENSMUSG00000028124	GCLM	2.18822	2.14938	2.2394	2.55805	2.53457	3.01203	2.54994	2.54274	2.70551	2.33724	3.5285	3.69885	0.0680214
ENSG00000024048	ENSMUSG00000023977	UBR2	6.50616	6.27043	6.60204	6.0939	2.97732	3.16352	2.93833	3.44965	3.56038	3.51945	4.50983	4.02639	-0.163585
ENSG00000100311	ENSMUSG00000000489	PDGFB	0.068409	0.056921	0.04083	0.006651	24.143	26.4081	25.7803	0.128612	0.075895	0.097486	1.10066	26.4438	4.58648
ENSG00000024526	ENSMUSG00000028175	DEPDC1	3.67135	3.40664	3.41234	3.75619	1.90098	2.33651	2.52347	1.69583	1.69084	2.04247	2.80972	3.25365	0.211636
ENSG00000024862	ENSMUSG00000059554	CCDC28A	2.84848	3.3168	2.39237	3.58216	3.44183	4.54747	3.80774	2.73142	3.38801	2.95989	4.02644	4.93235	0.292769
ENSG00000025039	ENSMUSG00000028278	RRAGD	14.188	15.2092	17.0449	16.177	18.8288	17.0904	17.6226	9.19333	8.36398	9.76565	10.1077	18.8472	0.898905
ENSG00000025156	ENSMUSG00000019878	HSF2	13.9856	14.5021	13.5376	17.1214	5.10339	5.35157	7.38857	6.49888	6.77672	7.1143	7.79663	6.94785	-0.166286
ENSG00000025293	ENSMUSG00000038116	PHF20	8.63461	7.49684	7.0645	7.73385	9.13372	8.73629	9.88994	9.54785	8.83892	9.05643	10.1477	10.2533	0.0149328
ENSG00000025423	ENSMUSG00000025396	HSD17B6	0.880053	1.09455	1.25875	1.19607	0.386394	0.094886	0.540573	0.621853	0.344571	0.474333	1.48025	1.34062	-0.142945
ENSG00000025434	ENSMUSG00000002108	NR1H3	1.8495	1.87887	2.15825	1.79757	2.176	2.02128	1.43902	3.12209	2.94949	2.98966	4.02041	2.87877	-0.481893
ENSG00000025708	ENSMUSG00000022615	TYMP	0.251799	0.15728	0.189882	0.217603	0.472513	0.579132	0.284481	0.683182	0.795115	0.731508	1.7366	1.44538	-0.264823
ENSG00000025772	ENSMUSG00000018322	TOMM34	8.23479	8.54635	10.2668	10.1595	16.9486	16.9997	17.3653	14.9873	16.1646	15.2487	16.4669	18.1045	0.136786
ENSG00000025796	ENSMUSG00000019802	SEC63	17.0011	16.9967	17.5182	18.59	8.49686	7.83482	8.57137	8.05582	8.00002	8.17733	9.07772	9.30102	0.0350578
ENSG00000025800	ENSMUSG00000003731	KPNA6	12.2197	11.1815	10.8727	10.7982	14.007	13.5304	15.572	13.3384	12.9233	13.8502	14.3706	15.3698	0.0969763
ENSG00000026025	ENSMUSG00000026728	VIM	291.763	316.182	282.862	356.644	1667.35	1888.85	1720.59	921.125	976.379	854.253	918.252	1759.93	0.938557
ENSG00000136999	ENSMUSG00000037362	NOV	1.94915	2.79867	4.53144	2.87014	30.4259	34.3275	27.9661	0.555306	0.507403	0.331483	1.46473	31.9065	4.44514
ENSG00000145824	ENSMUSG00000021508	CXCL14	7.33098	8.2221	16.9002	9.9146	139.201	142.532	132.465	5.97078	5.2433	5.01217	6.40875	139.066	4.43958
ENSG00000176170	ENSMUSG00000061878	SPHK1	0.779885	0.914923	1.5295	0.974239	48.5026	52.4492	47.7092	1.17957	1.49656	1.34222	2.33945	50.5537	4.43358
ENSG00000026652	ENSMUSG00000023827	AGPAT4	8.18347	7.98847	9.63518	7.8083	6.57048	5.46065	5.76092	5.66462	6.07799	6.5448	7.09581	6.93068	-0.0339689
ENSG00000026751	ENSMUSG00000038179	SLAMF7	0	0	0.003335	0.005433	0	0	0	0	0	0	1	1	0
ENSG00000027001	ENSMUSG00000021993	MIPEP	3.35698	3.24929	3.68413	3.92895	3.83671	4.18583	3.81747	5.87014	5.8231	6.26544	6.98623	4.94667	-0.498055
ENSG00000027075	ENSMUSG00000021108	PRKCH	0	0	0	0	0.002434	0.051825	0	0.038194	0.015249	0.004625	1.01936	1.01809	-0.00179808
ENSG00000027644	ENSMUSG00000005640	INSRR	0.014808	0.005514	0.024321	0	0.00282	0.028066	0	0.01164	0.001408	0.005464	1.00617	1.0103	0.00590205
ENSG00000027697	ENSMUSG00000020009	IFNGR1	19.4614	22.4278	23.8434	23.788	8.44508	7.87874	7.74412	6.08167	6.36328	5.7023	7.04908	9.02265	0.356116
ENSG00000027847	ENSMUSG00000021504	B4GALT7	3.40353	3.81655	4.06541	3.47615	7.66346	7.95153	6.70881	7.03519	7.87458	6.72861	8.21279	8.44127	0.0395863
ENSG00000027869	ENSMUSG00000028071	SH2D2A	0	0.011423	0.006515	0.009958	0.110952	0.121159	0	0	0.060158	0.121631	1.0606	1.07737	0.0226386
ENSG00000028116	ENSMUSG00000064090	VRK2	2.00248	1.87683	2.08837	2.81103	0.750964	0.774908	0.784894	1.00565	0.827664	0.98209	1.93847	1.77026	-0.13096
ENSG00000028137	ENSMUSG00000028599	TNFRSF1B	0.051239	0.060955	0.293263	0.073063	0.022772	0.033673	0.012156	0.457133	0.280885	0.42177	1.3866	1.02287	-0.438929
ENSG00000028203	ENSMUSG00000036099	VEZT	12.2938	13.466	13.6707	14.743	3.7737	4.37193	4.27555	3.81951	4.26734	4.3644	5.15042	5.14039	-0.00281011
ENSG00000028277	ENSMUSG00000008496	POU2F2	0.386271	0.374183	0.256124	0.340882	0.41422	0.445255	0.483966	0.808265	1.10773	0.96121	1.95907	1.44781	-0.436293
ENSG00000028310	ENSMUSG00000057649	BRD9	4.27713	3.78797	4.1401	3.83725	7.39799	8.16352	7.64943	9.85834	9.78842	8.96436	10.537	8.73698	-0.270263
ENSG00000028528	ENSMUSG00000032382	SNX1	9.03758	8.06802	8.28219	8.45043	8.11967	7.97822	7.58429	8.95692	9.01294	9.25551	10.0751	8.89406	-0.179884
ENSG00000028839	ENSMUSG00000071359	TBPL1	6.71638	7.14636	6.31396	8.5578	3.35235	3.8601	3.08351	4.75636	4.90982	4.89698	5.85439	4.43199	-0.401564
ENSG00000029153	ENSMUSG00000040187	ARNTL2	1.62403	1.66941	1.67703	1.65066	1.13155	1.6309	1.52992	2.68161	2.27675	2.28112	3.41316	2.43079	-0.489684
ENSG00000029363	ENSMUSG00000037608	BCLAF1	25.2783	23.3698	22.7444	24.9238	12.3666	12.5335	13.7565	14.8678	14.73	16.2518	16.2832	13.8856	-0.229799
ENSG00000029364	ENSMUSG00000048833	SLC39A9	17.0325	18.1543	17.9411	19.8752	9.83745	10.8053	10.1514	9.73797	8.84173	8.91099	10.1636	11.2647	0.148406
ENSG00000029534	ENSMUSG00000031543	ANK1	0.099768	0.105151	0.062568	0.062541	1.74358	1.3905	1.81437	0.524411	0.361213	0.399254	1.42829	2.64948	0.891418
ENSG00000029559	ENSMUSG00000029306	IBSP	0	0	0.029731	0	0	0	0	0	0	0	1	1	0
ENSG00000029639	ENSMUSG00000036983	TFB1M	2.6169	2.20756	2.32444	2.18013	1.4209	1.16015	1.08597	1.91928	2.05236	2.04395	3.0052	2.22234	-0.435381
ENSG00000029725	ENSMUSG00000020817	RABEP1	16.5646	15.5891	16.5701	16.8831	11.5939	11.1156	11.0964	13.7693	14.3241	14.5528	15.2154	12.2686	-0.310557
ENSG00000030066	ENSMUSG00000051329	NUP160	9.71239	8.95463	8.51641	8.81253	5.54817	5.74763	5.81621	6.97514	7.12525	6.9984	8.03293	6.704	-0.260904
ENSG00000030110	ENSMUSG00000057789	BAK1	4.45738	4.6799	5.0117	4.80304	12.1951	12.2299	12.4788	12.7503	12.5729	12.5809	13.6347	13.3013	-0.0357242
ENSG00000030304	ENSMUSG00000057280	MUSK	0.006359	0	0.000972	0.001939	0.036085	0.079277	0	0.000219	0.002072	0.004898	1.0024	1.03845	0.0509843
ENSG00000030419	ENSMUSG00000025997	IKZF2	1.18133	1.28948	1.17246	1.04113	0.660032	0.539425	0.672524	0.385521	0.320394	0.408853	1.37159	1.62399	0.243697
ENSG00000150687	ENSMUSG00000039405	PRSS23	1.45955	1.71008	1.59855	1.90669	36.6906	36.7007	39.6948	0.749379	0.89544	0.872514	1.83911	38.6954	4.39508
ENSG00000031003	ENSMUSG00000036501	FAM13B	7.63146	6.49064	6.0229	6.91323	4.44914	4.64296	4.71779	3.45773	3.15203	3.19449	4.26808	5.6033	0.392688
ENSG00000031081	ENSMUSG00000022799	ARHGAP31	8.12561	6.70581	8.72567	6.67306	10.039	11.4329	11.1246	19.1171	20.5466	21.0645	21.2427	11.8655	-0.840192
ENSG00000031691	ENSMUSG00000023919	CENPQ	7.68825	6.64744	7.79291	11.9646	2.58983	2.77364	3.60573	3.89494	3.07919	3.17542	4.38318	3.98973	-0.135687
ENSG00000031698	ENSMUSG00000068739	SARS	23.0603	21.898	23.2312	27.1767	27.5871	29.6728	28.9861	39.6635	39.2692	36.3029	39.4119	29.7487	-0.405805
ENSG00000031823	ENSMUSG00000002372	RANBP3	10.9745	11.2726	11.0325	10.9815	11.201	11.7528	11.0719	14.0282	14.7535	14.1107	15.2975	12.3419	-0.309732
ENSG00000032219	ENSMUSG00000048118	ARID4A	7.0155	6.33835	6.74319	7.10055	4.35266	4.70627	4.9947	3.98904	3.94616	4.60091	5.17871	5.68454	0.134453
ENSG00000032389	ENSMUSG00000036613	TSSC1	2.58988	2.58276	2.85479	3.36136	6.93239	6.8566	5.91396	5.73107	6.05976	5.19033	6.66039	7.56765	0.184239
ENSG00000032444	ENSMUSG00000004565	PNPLA6	11.9502	12.4421	14.2694	10.5038	28.2529	26.0158	22.5942	19.9701	19.6986	19.0657	20.5782	26.6209	0.371449
ENSG00000032742	ENSMUSG00000040040	IFT88	3.0893	2.85756	3.11772	3.54768	1.29811	1.6245	1.85988	1.41526	1.66024	1.69037	2.58862	2.59416	0.00308389
ENSG00000033030	ENSMUSG00000029427	ZCCHC8	3.67608	3.72556	3.28461	3.9099	1.78789	2.26452	2.23039	2.5445	2.46376	2.44181	3.48335	3.09427	-0.170879
ENSG00000033050	ENSMUSG00000028953	ABCF2	9.95298	8.73849	9.7464	9.48258	17.4292	17.3854	16.4385	16.4417	18.0112	16.8676	18.1068	18.0843	-0.00179305
ENSG00000033100	ENSMUSG00000038181	CHPF2	13.695	14.5293	16.4439	12.555	30.1692	29.0431	30.9649	14.7718	14.1436	14.9278	15.6144	31.0591	0.992137
ENSG00000033122	ENSMUSG00000028176	LRRC7	0.161939	0.136831	0.071535	0.107906	0.209036	0.267127	0.263871	0.74982	0.661374	0.819261	1.74349	1.24668	-0.483885
ENSG00000033170	ENSMUSG00000021065	FUT8	18.9766	20.378	22.0626	23.4972	8.28279	8.12562	8.82021	9.01252	9.52845	9.02544	10.1888	9.40954	-0.114789
ENSG00000033178	ENSMUSG00000035898	UBA6	11.9652	11.9269	12.1885	11.795	3.41932	3.84851	3.99074	4.33434	4.8294	5.09127	5.75167	4.75286	-0.275186
ENSG00000033627	ENSMUSG00000019302	ATP6V0A1	14.2912	16.804	18.5815	14.9873	12.3362	12.7453	11.8357	10.4754	10.17	10.1786	11.2747	13.3058	0.238967
ENSG00000033800	ENSMUSG00000032405	PIAS1	6.23929	5.57669	5.2966	5.42299	3.36359	3.07487	3.39019	3.62288	3.78492	3.56694	4.65824	4.27622	-0.123451
ENSG00000033867	ENSMUSG00000021733	SLC4A7	8.57144	9.17422	7.90904	8.51544	2.77732	2.61011	2.60251	2.22042	2.30385	2.37369	3.29932	3.66331	0.150981
ENSG00000034053	ENSMUSG00000030519	APBA2	11.4539	11.0283	10.4889	10.3488	12.8347	12.8507	12.7227	23.0049	22.4732	21.1505	23.2095	13.8027	-0.749768
ENSG00000034152	ENSMUSG00000018932	MAP2K3	2.48477	2.47213	3.36453	2.68634	9.62681	10.9797	11.3183	9.13198	9.12059	9.01772	10.0901	11.6416	0.206348
ENSG00000034239	ENSMUSG00000068617	EFCAB1	0.095423	0.129236	0.097355	0.117847	0.127588	0.09612	0.122233	0.037502	0.082435	0.123296	1.08108	1.11531	0.0449793
ENSG00000034533	ENSMUSG00000032567	ASTE1	2.35664	2.73846	2.98164	3.0709	1.76095	2.05202	1.45406	1.69019	1.95398	1.76254	2.80224	2.75568	-0.0241725
ENSG00000049540	ENSMUSG00000029675	ELN	10.5001	10.7952	14.0181	10.1869	142.022	139.802	150.717	5.94403	5.46847	6.35257	6.92169	145.18	4.39058
ENSG00000034693	ENSMUSG00000019809	PEX3	5.48798	5.56523	6.34034	6.77348	3.36828	3.87516	4.02476	2.82694	3.10356	2.70776	3.87942	4.75607	0.293928
ENSG00000034713	ENSMUSG00000031950	GABARAPL2	26.12	27.1275	26.6664	33.3996	17.404	19.4296	19.4433	26.9569	25.0514	25.5753	26.8612	19.759	-0.443014
ENSG00000034971	ENSMUSG00000026697	MYOC	0	0	0	0	0	0	0	0	0.0035	0	1.00117	1	-0.00168216
ENSG00000035115	ENSMUSG00000020669	SH3YL1	2.65713	2.86216	2.62211	2.66756	1.90635	1.65782	1.46965	1.80332	1.73611	1.82206	2.78716	2.67794	-0.0576745
ENSG00000143248	ENSMUSG00000026678	RGS5	0.138228	0.171232	0.171113	0.22225	18.485	19.6027	23.7508	0.049205	0.079587	0.068091	1.06563	21.6128	4.34211
ENSG00000035499	ENSMUSG00000021697	DEPDC1B	6.12825	6.26863	5.16003	7.08134	2.22995	2.15146	2.34247	3.4924	3.11946	3.7968	4.46955	3.24129	-0.463561
ENSG00000035664	ENSMUSG00000032380	DAPK2	0.60125	0.479635	0.615289	0.515059	1.45995	0.924396	1.25418	1.33977	1.36228	1.26225	2.32143	2.21284	-0.0691144
ENSG00000035681	ENSMUSG00000028245	NSMAF	3.68436	3.49566	3.27036	3.725	3.26304	3.27041	3.72386	4.71752	4.94552	4.66218	5.77507	4.41911	-0.386085
ENSG00000035687	ENSMUSG00000015961	ADSS	7.71143	7.25985	7.23642	8.17527	5.33288	4.65453	5.7031	6.11617	6.45826	6.54638	7.3736	6.23017	-0.243098
ENSG00000035720	ENSMUSG00000029254	STAP1	0	0	0.037115	0	0	0	0.027661	0	0	0	1	1.00922	0.0132412
ENSG00000004399	ENSMUSG00000030123	PLXND1	1.83837	1.98581	2.20695	1.66999	113.614	106.597	102.541	5.08672	5.12076	5.05448	6.08732	108.584	4.15686
ENSG00000035928	ENSMUSG00000029191	RFC1	12.2968	11.8912	12.0287	12.8275	7.67929	8.18246	8.35925	10.5907	10.7108	11.5137	11.9384	9.07367	-0.39585
ENSG00000036054	ENSMUSG00000022749	TBC1D23	9.48224	9.54545	9.48686	10.422	5.24893	4.70612	5.1577	4.18184	3.92704	4.33827	5.14905	6.03758	0.229665
ENSG00000036257	ENSMUSG00000004364	CUL3	8.36659	8.22154	7.85459	9.49148	5.84798	6.19197	6.71695	6.70844	6.89671	7.33666	7.9806	7.2523	-0.138059
ENSG00000036448	ENSMUSG00000031461	MYOM2	0.268931	0.382909	0.249435	0.312726	0.139091	0.17872	0.187988	0.210536	0.311373	0.272454	1.26479	1.1686	-0.114114
ENSG00000036473	ENSMUSG00000031173	OTC	0.020291	0.009052	0.038754	0	0	0	0	0	0	0	1	1	0
ENSG00000036530	ENSMUSG00000021259	CYP46A1	0.280146	0.244544	0.20996	0.27929	0.696603	0.737434	0.509279	0.258864	0.182502	0.167401	1.20292	1.64777	0.453973
ENSG00000036549	ENSMUSG00000039068	ZZZ3	4.87682	4.61997	4.63924	4.84849	2.40857	2.57837	2.90796	2.81859	2.70566	2.6795	3.73458	3.63163	-0.0403283
ENSG00000036565	ENSMUSG00000036330	SLC18A1	0.008225	0	0.007855	0	0.183183	0.03892	0.08781	0.167035	0.051531	0.130648	1.1164	1.1033	-0.0170293
ENSG00000036672	ENSMUSG00000032010	USP2	2.49221	2.6139	2.81224	2.61031	2.47982	2.99199	2.52824	2.68939	2.25738	1.80118	3.24932	3.66669	0.174341
ENSG00000036828	ENSMUSG00000051980	CASR	0	0	0	0	0	0	0	0	0	0.015116	1.00504	1	-0.00725101
ENSG00000037280	ENSMUSG00000020357	FLT4	0.025513	0.037035	0.065943	0.030053	0.04361	0.05819	0.087946	0.370441	0.338548	0.363086	1.35736	1.06325	-0.352323
ENSG00000037474	ENSMUSG00000021595	NSUN2	7.39761	7.15515	6.6591	7.16757	8.43554	8.75329	9.52315	8.96295	8.87704	9.42783	10.0893	9.90399	-0.0267405
ENSG00000037637	ENSMUSG00000028920	FBXO42	5.02866	4.68344	4.43962	4.51638	4.02358	3.72779	3.70985	4.52188	4.84714	4.8423	5.73711	4.8204	-0.25117
ENSG00000037749	ENSMUSG00000020522	MFAP3	13.0103	13.015	13.7391	14.8683	5.739	4.78969	6.14827	4.40163	4.60212	5.0581	5.68728	6.55899	0.205734
ENSG00000037757	ENSMUSG00000004996	MRI1	3.82164	3.27647	3.1654	3.54892	3.14637	3.0489	3.24684	4.75925	5.3791	5.20591	6.11475	4.14737	-0.560097
ENSG00000037965	ENSMUSG00000001657	HOXC8	0	0	0.018221	0	0	0	0	0	0	0	1	1	0
ENSG00000038002	ENSMUSG00000031521	AGA	8.48943	9.15375	11.0014	10.8893	2.38813	3.20669	2.76797	2.98112	2.79247	3.21291	3.9955	3.7876	-0.0770943
ENSG00000038210	ENSMUSG00000029186	PI4K2B	1.78338	1.90427	2.17363	1.8385	1.88694	1.44384	1.96214	1.79695	1.51009	2.14091	2.81599	2.76431	-0.0267237
ENSG00000038219	ENSMUSG00000061755	BOD1L1	7.64635	6.69836	6.40763	5.92681	4.98942	5.63344	5.19301	5.17078	5.63635	5.15503	6.32072	6.27196	-0.0111726
ENSG00000038274	ENSMUSG00000042032	MAT2B	11.2556	11.7561	11.1452	15.5011	5.42647	6.02218	6.95584	6.06579	5.75709	6.11878	6.98055	7.13483	0.0315379
ENSG00000038295	ENSMUSG00000053626	TLL1	0	0	0.004083	0.003325	0	0	0	0.015787	0.002232	0.021663	1.01323	1	-0.0189579
ENSG00000038358	ENSMUSG00000036270	EDC4	14.5118	13.5267	13.1067	11.6695	25.4778	25.0319	20.3858	31.9241	34.8982	30.1732	33.3318	24.6318	-0.436375
ENSG00000163453	ENSMUSG00000036256	IGFBP7	16.5293	18.3986	27.0963	20.6315	263.293	268.888	262.46	14.3772	13.9337	13.8201	15.0437	265.881	4.14355
ENSG00000198796	ENSMUSG00000032845	ALPK2	0.097458	0.09382	0.101252	0.067721	15.4215	15.2345	16.6627	0.004197	0.013165	0.021598	1.01299	16.7729	4.04945
ENSG00000038532	ENSMUSG00000068663	CLEC16A	3.81326	3.52235	3.46854	2.85303	6.5866	6.35495	6.03202	6.04939	5.83564	5.9063	6.93044	7.32453	0.0797876
ENSG00000038945	ENSMUSG00000025044	MSR1	0	0	0.000983	0	0	0	0	0	0	0	1	1	0
ENSG00000039068	ENSMUSG00000000303	CDH1	1.65796	1.94358	2.08131	2.16398	0.553985	0.556921	0.754744	0.097082	0.079201	0.016566	1.06428	1.62188	0.607788
ENSG00000039123	ENSMUSG00000016018	SKIV2L2	10.5864	10.304	10.2285	11.4213	6.86608	6.22792	6.85685	8.75247	8.66364	8.71559	9.71056	7.65028	-0.344042
ENSG00000039139	ENSMUSG00000022262	DNAH5	0.248264	0.177816	0.335723	0.166304	0.222313	0.160013	0.125661	0.092246	0.117204	0.100406	1.10329	1.16933	0.0838749
ENSG00000039319	ENSMUSG00000021706	ZFYVE16	7.47075	7.53996	6.89689	6.68177	2.11479	2.0694	1.9418	2.4432	2.26791	2.62292	3.44468	3.042	-0.179349
ENSG00000039523	ENSMUSG00000038604	FAM65A	7.59424	7.30918	7.04431	6.70533	14.5329	14.0495	14.5923	11.0553	11.5808	12.4536	12.6966	15.3916	0.277699
ENSG00000039537	ENSMUSG00000022181	C6	0	0	0	0.005278	0	0	0	0	0	0.004298	1.00143	1	-0.00206542
ENSG00000168453	ENSMUSG00000022096	HR	0.224424	0.195766	0.1903	0.166982	19.3334	17.1148	15.6582	0.170449	0.074587	0.097683	1.11424	18.3688	4.04312
ENSG00000039600	ENSMUSG00000040489	SOX30	0	0	0.008848	0	0.014263	0.126382	0.036269	0.007165	0.01413	0	1.0071	1.05897	0.072459
ENSG00000039650	ENSMUSG00000002963	PNKP	6.9013	5.74851	6.46643	5.83059	14.8798	14.8932	14.09	17.1542	17.234	19.8634	19.0839	15.621	-0.288864
ENSG00000039987	ENSMUSG00000052819	BEST2	0.087481	0.010845	0.066893	0	0.024308	0.052719	0	0.034446	0.00956	0.045327	1.02978	1.02568	-0.00575828
ENSG00000040199	ENSMUSG00000031732	PHLPP2	2.52275	2.32152	2.12795	2.06389	2.32331	2.28474	2.65462	2.49041	2.47536	2.58151	3.51576	3.42089	-0.0394632
ENSG00000040275	ENSMUSG00000069910	SPDL1	5.38119	5.24648	5.18231	6.20447	2.75678	3.45856	3.79208	3.43086	3.59944	3.46527	4.49853	4.33581	-0.0531511
ENSG00000040341	ENSMUSG00000025920	STAU2	7.36379	7.2675	6.62778	7.9955	3.10362	3.36403	3.44497	4.49549	4.30547	4.38924	5.39673	4.30421	-0.326338
ENSG00000040487	ENSMUSG00000028744	PQLC2	10.6097	11.4084	12.2679	11.8987	18.0338	17.6143	17.1983	16.6551	16.5061	15.9188	17.36	18.6155	0.100732
ENSG00000040531	ENSMUSG00000005949	CTNS	10.9689	12.7874	12.5923	12.2474	10.5821	11.0829	10.578	8.60925	8.36907	8.80471	9.59434	11.7477	0.292117
ENSG00000103811	ENSMUSG00000032359	CTSH	0.269473	0.308933	0.325166	0.354296	23.1251	23.1267	18.7085	0.459207	0.278975	0.443733	1.39397	22.6534	4.02246
ENSG00000040633	ENSMUSG00000018572	PHF23	13.6874	13.9652	14.7409	17.4619	24.4973	23.7513	22.8071	22.3414	21.807	22.0478	23.0654	24.6853	0.0979198
ENSG00000165449	ENSMUSG00000037762	SLC16A9	16.6636	20.5468	25.9907	20.6884	69.8037	67.0107	74.6108	3.11794	3.60688	3.88987	4.53823	71.4751	3.97724
ENSG00000040933	ENSMUSG00000026113	INPP4A	5.40607	5.04276	5.32233	4.89516	7.29584	6.8617	6.42706	6.71477	6.61528	6.75749	7.69585	7.86153	0.0307303
ENSG00000041353	ENSMUSG00000024511	RAB27B	0.142718	0.096855	0.13637	0.1178	0.169213	0.119082	0.105929	0.159777	0.110703	0.078561	1.11635	1.13141	0.0193337
ENSG00000041515	ENSMUSG00000039057	MYO16	1.55346	1.23403	1.75359	1.2794	4.42952	3.93067	3.79873	2.98079	2.89266	3.15547	4.00964	5.05297	0.333659
ENSG00000041802	ENSMUSG00000022538	LSG1	9.31234	9.4035	10.413	10.2766	7.51785	8.62725	7.35629	8.66044	8.68723	9.78078	10.0428	8.8338	-0.185058
ENSG00000041880	ENSMUSG00000023249	PARP3	1.27472	1.3755	1.80386	1.43028	3.25925	2.70571	1.95618	2.23963	2.03685	2.17903	3.15184	3.64038	0.207896
ENSG00000205403	ENSMUSG00000058952	CFI	8.86582	10.2864	12.6779	12.0733	23.9812	23.0946	21.0958	0.434822	0.598045	0.504888	1.51259	23.7238	3.97125
ENSG00000041988	ENSMUSG00000039759	THAP3	7.16272	8.16698	7.3526	8.66358	13.5596	14.3906	13.0409	15.4334	15.2674	15.8488	16.5165	14.6637	-0.171659
ENSG00000042062	ENSMUSG00000074577	FAM65C	0.824897	0.93087	1.93228	0.97978	0.337587	0.27485	0.345654	0.149619	0.234405	0.267612	1.21721	1.31936	0.116262
ENSG00000042088	ENSMUSG00000021177	TDP1	4.24596	4.04222	3.93439	4.33743	2.11972	2.58663	2.86036	3.14345	3.45167	3.62814	4.40775	3.52224	-0.323552
ENSG00000042286	ENSMUSG00000020085	AIFM2	1.21277	1.49818	1.78817	1.27653	2.55559	1.94273	2.72778	1.78361	1.62358	1.68573	2.69764	3.4087	0.337524
ENSG00000042317	ENSMUSG00000021007	SPATA7	1.54098	1.61923	1.44517	1.6697	0.763083	0.689338	1.01806	0.831475	0.781549	0.785087	1.79937	1.82349	0.0192123
ENSG00000042429	ENSMUSG00000031935	MED17	4.62771	4.52269	4.46401	5.24117	3.149	2.84983	3.06082	3.69737	3.94296	4.04763	4.89599	4.01988	-0.284446
ENSG00000042445	ENSMUSG00000056666	RETSAT	9.19319	9.7265	12.0192	10.1224	13.2722	13.2547	12.4737	8.71885	9.73768	9.19843	10.2183	14.0002	0.454288
ENSG00000106366	ENSMUSG00000037411	SERPINE1	0.561198	0.889404	1.51021	1.02944	35.9841	40.4793	46.6687	1.61927	2.09676	1.40451	2.70685	42.044	3.95722
ENSG00000042753	ENSMUSG00000008036	AP2S1	18.5568	20.8072	19.3761	24.1289	27.6295	27.8331	30.3155	33.0561	30.5123	30.5426	32.3703	29.5927	-0.129432
ENSG00000042781	ENSMUSG00000026609	USH2A	0.018204	0.009217	0.021527	0.010985	0.008332	0	0.004477	0.015384	0.001631	0.001979	1.00633	1.00427	-0.00295867
ENSG00000042813	ENSMUSG00000020193	ZPBP	0	0	0.01162	0	0	0	0	0	0	0	1	1	0
ENSG00000042832	ENSMUSG00000053469	TG	0.044951	0.054131	0.083711	0.082017	0.001926	0.020175	0.001731	0.063406	0.078016	0.090935	1.07745	1.00794	-0.0962086
ENSG00000042980	ENSMUSG00000014725	ADAM28	0.096866	0.057113	0.040947	0.040512	0.051888	0.038882	0.019582	0.050795	0.031045	0.06317	1.04834	1.03678	-0.0159867
ENSG00000043039	ENSMUSG00000032033	BARX2	0.007291	0.006505	0.006963	0.004701	0	0	0	0.008974	0	0.013853	1.00761	1	-0.0109359
ENSG00000043093	ENSMUSG00000027708	DCUN1D1	4.96743	4.76027	4.37097	5.32414	1.72478	1.58802	2.04303	2.30833	2.20757	2.28565	3.26718	2.78527	-0.230227
ENSG00000043143	ENSMUSG00000020387	JADE2	0.212142	0.244978	0.583303	0.256091	0.352015	0.387428	0.231759	0.387224	0.31826	0.196009	1.3005	1.32373	0.0255494
ENSG00000043355	ENSMUSG00000061524	ZIC2	16.7315	16.2127	13.8782	15.6308	20.7145	19.8574	19.7719	16.0929	17.3576	15.1097	17.1867	21.1146	0.296947
ENSG00000043462	ENSMUSG00000002699	LCP2	0.013197	0.005848	0.029731	0.010378	0	0	0	0	0	0	1	1	0
ENSG00000043514	ENSMUSG00000028653	TRIT1	4.39175	4.45102	4.46703	4.70478	2.4878	2.57309	2.74586	2.61957	2.91137	3.13051	3.88715	3.60225	-0.109815
ENSG00000044012	ENSMUSG00000032978	GUCA2B	0	0	0	0	0	0	0	0	0	0	1	1	0
ENSG00000044090	ENSMUSG00000038545	CUL7	3.15461	3.58591	3.48698	2.87747	7.27032	6.53306	6.23097	5.86145	6.70947	6.34385	7.30492	7.67812	0.0718838
ENSG00000044115	ENSMUSG00000037815	CTNNA1	45.165	45.7095	43.8233	48.4409	76.7641	78.377	74.2354	54.1225	55.3465	52.9297	55.1329	77.4588	0.490515
ENSG00000044446	ENSMUSG00000031295	PHKA2	2.2176	2.35714	2.47765	1.94515	2.36301	2.26913	2.31928	2.35817	2.658	2.64548	3.55388	3.31714	-0.0994544
ENSG00000044459	ENSMUSG00000038070	CNTLN	2.85071	2.67173	2.846	2.76796	1.03424	1.03037	0.99206	1.76704	1.73354	1.96348	2.82135	2.01889	-0.482826
ENSG00000137834	ENSMUSG00000036867	SMAD6	0.20269	0.145232	0.151858	0.151267	16.9908	16.9219	19.9099	0.309889	0.100845	0.321207	1.24398	18.9409	3.92847
ENSG00000044574	ENSMUSG00000026864	HSPA5	101.859	93.0846	100.25	107.28	141.372	145.989	149.461	108.699	107.033	104.221	107.651	146.608	0.445598
ENSG00000046604	ENSMUSG00000044393	DSG2	0.522776	0.677967	0.637369	0.493245	0.485855	0.549907	0.467474	0.554137	0.303806	0.381173	1.41304	1.50108	0.0871986
ENSG00000046647	ENSMUSG00000040621	GEMIN8	3.93598	4.72172	4.74178	5.05693	6.38565	7.40878	6.17516	3.93563	4.47228	4.43307	5.28032	7.65653	0.536064
ENSG00000046651	ENSMUSG00000040586	OFD1	4.35422	4.31901	4.26725	4.18095	2.96289	2.36401	2.75294	2.75815	2.82608	3.26147	3.94857	3.69328	-0.0964271
ENSG00000046653	ENSMUSG00000031342	GPM6B	342.26	385.963	392.534	423.73	106.01	110.696	112.936	96.5679	91.7109	95.7577	95.6788	110.88	0.212734
ENSG00000046889	ENSMUSG00000048960	PREX2	1.15761	1.19157	2.27719	1.05296	2.83033	2.23592	2.73042	0.886985	0.760182	0.775758	1.80764	3.59889	0.993444
ENSG00000047056	ENSMUSG00000021147	WDR37	4.46615	4.18884	4.1678	3.9748	5.2581	4.75233	5.18215	6.09715	5.91556	6.32475	7.11248	6.0642	-0.230037
ENSG00000047188	ENSMUSG00000034653	YTHDC2	4.22525	4.31529	4.61493	4.00099	1.64251	2.22677	1.94389	1.80961	1.93929	2.22974	2.99288	2.93773	-0.0268338
ENSG00000047230	ENSMUSG00000031360	CTPS2	5.37354	5.60869	5.43996	6.24128	3.02103	3.43282	2.78913	4.79054	4.15956	4.48522	5.47844	4.08099	-0.424845
ENSG00000047249	ENSMUSG00000033793	ATP6V1H	7.96176	8.35286	8.57802	9.61555	9.25748	10.2322	10.1764	7.28621	6.80803	7.46203	8.18542	10.8887	0.411702
ENSG00000047346	ENSMUSG00000034858	FAM214A	8.62468	8.94257	8.66147	8.40762	4.30396	4.39882	4.68858	3.30404	3.13332	3.77675	4.4047	5.46379	0.310857
ENSG00000047365	ENSMUSG00000037999	ARAP2	8.51854	8.71022	10.7344	8.41769	4.21679	4.05204	5.17979	3.06178	2.94383	3.41779	4.14113	5.48287	0.404907
ENSG00000047410	ENSMUSG00000006005	TPR	19.9874	16.3487	17.9724	15.9329	11.2102	12.5836	11.2618	13.7286	14.1869	14.217	15.0442	12.6852	-0.246059
ENSG00000047457	ENSMUSG00000003617	CP	0.759225	0.760948	0.897281	0.999822	0.381852	0.4029	0.255146	0.425842	0.360222	0.446194	1.41075	1.34663	-0.0671087
ENSG00000047578	ENSMUSG00000032743	KIAA0556	3.00389	2.55021	2.91361	2.1077	3.6728	3.16423	3.59333	3.97961	3.93993	3.97547	4.965	4.47678	-0.149331
ENSG00000047579	ENSMUSG00000057531	DTNBP1	2.58817	2.82307	3.37243	3.4145	4.95334	4.91546	5.09728	3.76464	3.42169	3.01272	4.39968	5.98869	0.444842
ENSG00000047597	ENSMUSG00000015342	XK	0.012355	0.011024	0.030817	0.024024	0	0.121795	0	0.02281	0.048379	0	1.02373	1.0406	0.0235785
ENSG00000047617	ENSMUSG00000038115	ANO2	0.005349	0.014319	0.020434	0.012482	0.057058	0.003053	0.030458	0.003292	0.01955	0.010164	1.011	1.03019	0.0271241
ENSG00000047621	ENSMUSG00000030347	C12orf4	5.74947	5.59629	5.80467	6.37594	3.136	3.65293	3.70548	3.05692	3.10814	3.28137	4.14881	4.49813	0.11663
ENSG00000047648	ENSMUSG00000031355	ARHGAP6	0.071145	0.081842	0.081117	0.055098	0.083377	0.091047	0.128837	0.100602	0.102428	0.065809	1.08961	1.10109	0.0151126
ENSG00000047662	ENSMUSG00000015879	FAM184B	5.57563	5.85049	5.61334	5.28807	8.73143	8.73977	8.68595	4.98749	4.77914	5.19061	5.98575	9.71905	0.699284
ENSG00000047849	ENSMUSG00000032479	MAP4	20.3667	19.5641	19.6287	18.87	46.5702	45.7367	45.6006	32.8295	32.644	32.3329	33.6022	46.9691	0.483159
ENSG00000047932	ENSMUSG00000019861	GOPC	12.1479	13.4144	11.3795	12.4827	7.73261	7.34622	8.29525	6.44019	6.87532	7.40097	7.90549	8.79136	0.153231
ENSG00000047936	ENSMUSG00000019893	ROS1	0	0	0	0.000628	0	0.00068	0	0	0	0	1	1.00023	0.000326974
ENSG00000048028	ENSMUSG00000032267	USP28	7.23904	6.85783	7.11631	7.45155	3.1377	3.36668	3.30905	4.58753	5.05139	5.45464	6.03119	4.27114	-0.497819
ENSG00000048140	ENSMUSG00000025875	TSPAN17	7.28716	8.12795	8.45472	8.10995	12.0644	11.284	10.9852	11.5606	11.5552	12.6369	12.9175	12.4445	-0.0538197
ENSG00000048342	ENSMUSG00000039765	CC2D2A	4.38004	4.4325	4.66615	4.80427	3.47218	3.12024	3.17212	3.80178	3.88627	4.09238	4.92681	4.25485	-0.211546
ENSG00000048392	ENSMUSG00000022292	RRM2B	6.875	6.25725	7.22552	8.0178	8.92748	7.5492	9.49595	6.02194	5.50449	6.56057	7.029	9.65754	0.458337
ENSG00000048405	ENSMUSG00000039841	ZNF800	4.52116	4.32604	4.49249	4.59156	2.19243	2.03679	2.25362	2.95321	2.80384	3.10848	3.95518	3.16095	-0.323388
ENSG00000048462	ENSMUSG00000022496	TNFRSF17	0.028767	0.025666	0	0	0.153413	0.022686	0	0.072439	0.052565	0.091096	1.07203	1.0587	-0.0180564
ENSG00000048471	ENSMUSG00000071669	SNX29	2.75578	2.65699	2.56488	2.21772	2.04106	1.81206	2.0436	3.0086	2.88249	3.10574	3.99895	2.96557	-0.431308
ENSG00000048540	ENSMUSG00000030226	LMO3	1.53	1.7085	1.23925	1.74999	0.415893	0.503031	0.421298	1.07086	1.01717	1.01958	2.03587	1.44674	-0.492841
ENSG00000048544	ENSMUSG00000034729	MRPS10	10.8473	9.49696	9.71068	11.3215	5.49114	6.66076	6.38943	9.00738	7.82495	8.39227	9.4082	7.18044	-0.389846
ENSG00000048545	ENSMUSG00000023982	GUCA1A	0.083283	0.037153	0.059387	0.053979	0.157302	0.184863	0	0.042146	0.136639	0.105494	1.09476	1.11406	0.0252063
ENSG00000048649	ENSMUSG00000035623	RSF1	10.3404	9.46711	9.92224	9.16948	5.99537	6.17258	6.97622	7.27022	7.16457	6.54686	7.99388	7.38139	-0.115004
ENSG00000048707	ENSMUSG00000020220	VPS13D	5.31243	4.72557	4.99281	3.79869	3.35383	3.33297	3.05026	3.53656	3.86605	3.40858	4.60373	4.24568	-0.116807
ENSG00000048740	ENSMUSG00000002107	CELF2	27.9766	27.6166	26.367	25.8224	20.2623	19.347	20.2536	18.2109	18.8929	18.2293	19.4444	20.9543	0.107893
ENSG00000048828	ENSMUSG00000038014	FAM120A	16.9645	16.1193	17.2317	14.9723	18.8697	18.775	19.3846	30.4787	32.7313	32.0283	32.7461	20.0098	-0.71062
ENSG00000048991	ENSMUSG00000056211	R3HDM1	6.68685	6.63651	5.46534	5.88459	4.22535	5.00199	4.1033	5.19644	5.79568	5.604	6.53204	5.44355	-0.262986
ENSG00000166106	ENSMUSG00000033453	ADAMTS15	2.58598	2.45413	2.52028	1.9363	30.5798	27.8539	28.2277	0.950661	1.07753	0.927104	1.9851	29.8872	3.91224
ENSG00000049130	ENSMUSG00000019966	KITLG	33.4444	35.2771	36.2039	35.678	5.77266	5.86323	6.82588	11.943	11.311	12.7824	13.0121	7.15392	-0.863049
ENSG00000049167	ENSMUSG00000021694	ERCC8	2.36472	2.62522	2.44112	2.48879	1.48309	1.78295	1.50064	1.87578	1.99197	2.0257	2.96448	2.5889	-0.195444
ENSG00000090530	ENSMUSG00000038168	P3H2	0.21804	0.220138	0.465104	0.239552	28.5719	28.4168	29.1439	1.13075	1.04744	0.881218	2.0198	29.7109	3.87871
ENSG00000049239	ENSMUSG00000028980	H6PD	11.0576	11.0826	11.4475	9.10233	10.3301	9.48317	9.38339	12.0207	10.6476	11.2162	12.2948	10.7322	-0.196101
ENSG00000049245	ENSMUSG00000028955	VAMP3	12.3012	12.8717	13.0786	15.0835	14.9943	15.6588	16.7803	12.7973	12.5131	12.2277	13.5127	16.8111	0.315098
ENSG00000049246	ENSMUSG00000028957	PER3	3.6429	3.86732	4.64635	3.77096	3.20205	3.48706	3.681	4.11617	3.99047	3.80497	4.97054	4.4567	-0.157425
ENSG00000049247	ENSMUSG00000028963	UTS2	2.3755	3.07048	3.45294	3.3765	1.73206	1.4511	1.91852	2.41452	2.47112	1.83852	3.24138	2.70056	-0.263352
ENSG00000049249	ENSMUSG00000028965	TNFRSF9	0.019454	0.018845	0	0.022192	0.046934	0.044418	0	0	0	0	1	1.03045	0.0432754
ENSG00000049323	ENSMUSG00000001870	LTBP1	45.3163	48.0065	53.6735	45.4385	44.6453	44.9481	44.7741	29.3384	27.5425	28.7748	29.5519	45.7892	0.631758
ENSG00000049449	ENSMUSG00000005973	RCN1	23.108	25.9177	31.2799	31.2701	19.9461	20.0345	20.989	16.3507	16.0427	15.5557	16.983	21.3232	0.32833
ENSG00000145536	ENSMUSG00000049538	ADAMTS16	0.06947	0.175902	0.274081	0.162011	21.6104	22.5097	20.8327	0.652688	0.609828	0.551479	1.60467	22.6509	3.81923
ENSG00000049541	ENSMUSG00000023104	RFC2	8.62039	8.01226	8.39836	9.82405	12.5798	16.1655	16.7129	23.9185	23.5013	23.5795	24.6664	16.1527	-0.61077
ENSG00000049618	ENSMUSG00000069729	ARID1B	9.92624	8.52962	7.78256	7.59205	6.49574	5.90326	6.02266	8.88133	8.91011	8.91631	9.90258	7.14055	-0.47177
ENSG00000049656	ENSMUSG00000021610	CLPTM1L	10.4394	11.3166	12.2868	12.0065	19.4664	19.4088	18.481	18.8046	18.3363	16.6721	18.9377	20.1187	0.0872802
ENSG00000049759	ENSMUSG00000024589	NEDD4L	33.6445	34.3566	26.1524	32.9651	7.21251	8.17971	7.40713	11.6442	11.4963	11.453	12.5312	8.59978	-0.543151
ENSG00000049768	ENSMUSG00000039521	FOXP3	0.160782	0.139133	0.110746	0.160736	0.319302	0.496241	0.547204	0.654407	0.535657	0.746239	1.64543	1.45425	-0.178194
ENSG00000049769	ENSMUSG00000039556	PPP1R3F	2.35789	2.43724	2.42611	2.1645	4.44961	5.08624	4.54972	6.33863	5.54817	5.89367	6.92682	5.69519	-0.282451
ENSG00000049860	ENSMUSG00000021665	HEXB	13.1216	14.8485	19.2765	15.4813	17.3738	17.5525	16.8613	15.9601	16.0825	15.9733	17.0053	18.2626	0.102905
ENSG00000049883	ENSMUSG00000021650	PTCD2	1.463	1.38319	1.7446	1.72317	0.93006	1.93326	1.07071	1.42699	1.45767	0.991143	2.29193	2.31134	0.0121665
ENSG00000050030	ENSMUSG00000046449	KIAA2022	2.75917	2.44764	2.18318	2.1255	1.34366	1.18162	1.12285	1.73754	1.78967	1.81213	2.77978	2.21604	-0.326983
ENSG00000168140	ENSMUSG00000039646	VASN	3.96379	5.57524	6.56943	5.20663	53.3579	50.5744	50.6409	2.90209	2.84705	2.65755	3.80223	52.5244	3.78807
ENSG00000050327	ENSMUSG00000033542	ARHGEF5	0.005528	0.004932	0.005279	0	0.00737	0	0.003934	0.013607	0.005772	0.010503	1.00996	1.00377	-0.00887325
ENSG00000050344	ENSMUSG00000029832	NFE2L3	1.18708	1.35271	1.21929	0.976857	0.817516	0.935108	0.896491	0.476063	0.43263	0.649712	1.51947	1.88304	0.309496
ENSG00000050393	ENSMUSG00000021371	MCUR1	6.10237	6.05476	6.87106	6.54883	10.2171	11.5806	10.0405	13.3001	14.069	12.0866	14.1519	11.6127	-0.285289
ENSG00000130751	ENSMUSG00000001988	NPAS1	0.48127	0.54017	0.683714	0.688856	38.0908	39.6952	39.2981	2.04379	2.09687	1.6262	2.92228	40.028	3.77584
ENSG00000050426	ENSMUSG00000037353	LETMD1	3.60109	3.95449	4.03479	3.88612	2.33128	1.84646	2.48692	2.31741	2.61481	2.94091	3.62438	3.22155	-0.169977
ENSG00000050438	ENSMUSG00000023032	SLC4A8	2.9839	2.85483	2.87956	2.43093	3.16286	2.77267	2.80792	2.19276	1.97325	2.41647	3.19416	3.91449	0.293385
ENSG00000050555	ENSMUSG00000026840	LAMC3	0.021175	0.015114	0.020221	0.023057	0.17905	0.103534	0.164189	0.036675	0.025238	0.09162	1.05118	1.14892	0.128277
ENSG00000050628	ENSMUSG00000040016	PTGER3	0	0.005807	0.006216	0	0	0.0077	0.044009	0	0.003398	0	1.00113	1.01724	0.0230217
ENSG00000050730	ENSMUSG00000044162	TNIP3	0	0	0	0.005241	0	0	0	0	0.001407	0	1.00047	1	-0.000676465
ENSG00000050748	ENSMUSG00000020366	MAPK9	3.49566	3.49274	3.21426	3.75522	3.5786	3.91878	3.7748	4.34671	4.12537	4.00647	5.15952	4.75739	-0.117065
ENSG00000134531	ENSMUSG00000030208	EMP1	1.00966	1.90297	1.97168	1.89932	31.2845	29.0968	33.5902	1.46326	1.455	1.23356	2.38394	32.3239	3.76118
ENSG00000050820	ENSMUSG00000031955	BCAR1	9.55317	9.91306	9.04391	8.66405	28.4388	27.1563	26.4558	15.0622	15.2054	14.7688	16.0121	28.3503	0.824199
ENSG00000051009	ENSMUSG00000044465	FAM160A2	5.75551	6.25961	5.67173	5.08586	5.3421	4.97854	5.47971	6.23679	6.57248	6.467	7.42542	6.26678	-0.244748
ENSG00000051108	ENSMUSG00000031770	HERPUD1	5.36793	6.0336	6.44427	6.59417	4.90092	6.40834	6.00914	4.38744	4.02523	4.57182	5.32816	6.7728	0.346114
ENSG00000051128	ENSMUSG00000003573	HOMER3	18.6535	17.3847	18.3307	17.4475	45.7062	42.8591	45.1945	90.5209	82.7974	86.024	87.4474	45.5866	-0.939806
ENSG00000051180	ENSMUSG00000027323	RAD51	3.33149	3.28116	2.98127	3.93946	4.03302	5.63469	5.20824	7.6807	8.22901	7.21485	8.70818	5.95865	-0.547387
ENSG00000051341	ENSMUSG00000034206	POLQ	2.30137	1.66916	1.84685	1.36212	1.21517	1.25422	1.20492	1.59268	1.54653	1.73088	2.62336	2.22477	-0.237762
ENSG00000051382	ENSMUSG00000032462	PIK3CB	5.17417	5.48955	5.52864	5.76108	3.36811	3.69829	3.64029	4.10273	4.06943	4.3666	5.17959	4.56889	-0.180992
ENSG00000051523	ENSMUSG00000006519	CYBA	0.028741	0.034191	0.045623	0.003235	0.009916	0	0	0.05686	0.236297	0.12251	1.13856	1.00331	-0.182444
ENSG00000051596	ENSMUSG00000025872	THOC3	2.65279	2.46289	2.42159	2.63961	5.93324	6.08572	4.76829	7.82174	7.03547	7.54626	8.46782	6.59575	-0.360455
ENSG00000051620	ENSMUSG00000019853	HEBP2	3.91099	4.55995	4.66242	5.50418	9.34818	10.7995	9.76052	6.94942	7.36284	7.79383	8.3687	10.9694	0.390409
ENSG00000051825	ENSMUSG00000038126	MPHOSPH9	4.66404	4.41451	4.08066	3.78361	2.58101	2.37751	2.81108	2.1746	2.38625	2.66708	3.40931	3.58987	0.0744491
ENSG00000052126	ENSMUSG00000030231	PLEKHA5	1.56242	1.54405	1.36085	1.54996	0.822373	0.973601	1.12367	0.731589	0.873424	0.701132	1.76871	1.97322	0.157847
ENSG00000052344	ENSMUSG00000030800	PRSS8	0.021384	0.038158	0.02042	0.016632	0	0.016863	0	0.072374	0.022328	0.027087	1.0406	1.00562	-0.0493238
ENSG00000052749	ENSMUSG00000035049	RRP12	2.86584	2.35876	2.71895	2.48859	6.40215	6.97212	6.60317	9.36864	8.90024	8.83474	10.0345	7.65914	-0.389719
ENSG00000052795	ENSMUSG00000061175	FNIP2	3.53757	3.38342	3.17103	3.22614	1.32517	1.51035	1.45015	3.36643	3.14176	3.28556	4.26458	2.42855	-0.812307
ENSG00000052802	ENSMUSG00000031604	MSMO1	78.4573	75.1138	83.6138	91.0408	21.2416	18.9269	23.6149	32.5549	29.5209	31.8716	32.3158	22.2611	-0.537716
ENSG00000052841	ENSMUSG00000027194	TTC17	10.2254	10.3093	10.3916	9.56286	3.98807	4.1632	4.31482	4.17157	4.6641	4.59677	5.47748	5.15537	-0.0874372
ENSG00000052850	ENSMUSG00000040310	ALX4	0.01862	0.009981	0.010683	0.015856	0.084114	0.097156	0	0.044745	0.037962	0.042882	1.04186	1.06042	0.0254747
ENSG00000053108	ENSMUSG00000036264	FSTL4	0.009553	0.004262	0.009123	0.022291	0.175132	0.169536	0.214171	0.011758	0.017457	0.003025	1.01075	1.18628	0.231023
ENSG00000053254	ENSMUSG00000033713	FOXN3	11.8236	11.5851	9.92352	10.6415	7.45615	7.6521	7.08714	10.3107	9.79119	10.1083	11.0701	8.39846	-0.398471
ENSG00000053328	ENSMUSG00000045555	METTL24	0.050332	0.100669	0.117884	0.056865	0.025363	0.063771	0.018675	0.039047	0	0.022964	1.02067	1.03594	0.0214184
ENSG00000053372	ENSMUSG00000028741	MRTO4	7.08278	6.63973	6.98448	7.4689	15.4495	16.281	17.2791	24.4954	24.8692	24.3711	25.5786	17.3365	-0.561121
ENSG00000053438	ENSMUSG00000067786	NNAT	415.166	461.035	355.976	534.37	196.688	205.862	198.063	321.508	315.466	282.268	307.414	201.204	-0.611522
ENSG00000053501	ENSMUSG00000002395	USE1	3.41722	3.31164	2.91545	3.57651	6.10269	7.73778	7.91021	8.99247	8.44823	9.02466	9.82179	8.25023	-0.251552
ENSG00000053702	ENSMUSG00000001520	NRIP2	0.654005	0.566816	0.583817	0.618633	0.544368	0.507245	0.583166	0.538284	0.801393	0.838368	1.72601	1.54493	-0.159907
ENSG00000053747	ENSMUSG00000024421	LAMA3	0.092743	0.058678	0.051104	0.066595	0.058664	0.027407	0.013542	0.095915	0.122335	0.09506	1.10444	1.0332	-0.0961851
ENSG00000053770	ENSMUSG00000036291	AP5M1	9.75819	9.78075	9.33634	10.6413	6.04538	5.69814	6.5458	5.49025	5.96941	6.43641	6.96535	7.09644	0.0268984
ENSG00000053900	ENSMUSG00000029176	ANAPC4	3.55341	3.81621	3.50764	3.83815	1.84988	1.69413	2.5789	2.07137	1.9667	2.22141	3.0865	3.04097	-0.0214396
ENSG00000053918	ENSMUSG00000009545	KCNQ1	0.043905	0.048111	0.058362	0.0661	0	0.038322	0	0.040789	0.054356	0.024567	1.0399	1.01277	-0.0381381
ENSG00000054116	ENSMUSG00000028847	TRAPPC3	8.62461	8.70064	9.13788	10.4937	15.7933	16.8261	17.5087	11.8887	10.895	10.874	12.2192	17.7093	0.53536
ENSG00000054148	ENSMUSG00000036504	PHPT1	19.7429	18.8467	19.3173	21.4339	63.7508	76.2525	73.8939	63.2596	59.5403	64.2152	63.3384	72.2991	0.190897
ENSG00000054179	ENSMUSG00000015085	ENTPD2	0.620773	0.891855	1.22437	0.972831	0.730153	0.440691	0.578725	0.260706	0.076818	0.180627	1.17272	1.58319	0.432979
ENSG00000054267	ENSMUSG00000039219	ARID4B	9.43929	9.09249	8.90216	9.28548	6.12133	6.55583	7.02148	6.20639	6.0616	6.57205	7.28001	7.56622	0.0556307
ENSG00000054277	ENSMUSG00000026525	OPN3	2.76447	2.40827	2.21261	2.76938	2.40476	1.63201	2.5491	2.87692	3.67134	3.86098	4.46975	3.19529	-0.484246
ENSG00000054282	ENSMUSG00000026504	SDCCAG8	4.84152	5.23221	4.6317	5.83533	3.39545	2.77978	3.23458	2.6648	2.61313	2.80916	3.6957	4.1366	0.162599
ENSG00000054392	ENSMUSG00000037375	HHAT	2.09527	2.20478	2.9051	2.33985	1.35441	1.17302	1.32562	0.824295	0.763047	0.808097	1.79848	2.28435	0.345007
ENSG00000054523	ENSMUSG00000063077	KIF1B	37.1793	33.7032	30.9634	28.8412	28.9413	28.2815	31.2636	34.4866	33.7776	34.4862	35.2501	30.4955	-0.209035
ENSG00000054598	ENSMUSG00000050295	FOXC1	0.01866	0.041623	0.098008	0.036284	0.410502	0.626097	0.803695	0.040191	0.112035	0.141821	1.09802	1.61343	0.555234
ENSG00000054611	ENSMUSG00000051864	TBC1D22A	1.97542	1.97158	1.91336	2.10656	3.56828	4.48567	3.80252	4.45773	3.96041	4.26731	5.22848	4.95216	-0.0783362
ENSG00000054654	ENSMUSG00000063450	SYNE2	16.1835	13.0002	13.0834	9.59613	9.1293	8.8517	8.50632	6.23407	6.50303	5.55042	7.09584	9.82911	0.470087
ENSG00000054690	ENSMUSG00000060716	PLEKHH1	2.48216	2.32795	2.30877	2.10372	2.41634	1.67771	2.01652	1.91323	1.90157	2.28613	3.03364	3.03686	0.00152861
ENSG00000054793	ENSMUSG00000027546	ATP9A	34.6919	35.7438	34.6896	31.7271	29.8841	27.3726	30.7764	24.5056	25.9197	25.7336	26.3863	30.3444	0.201639
ENSG00000054796	ENSMUSG00000005883	SPO11	0	0	0	0	0	0	0	0	0	0.007465	1.00249	1	-0.00358545
ENSG00000136235	ENSMUSG00000029816	GPNMB	0.122809	0.18165	0.262983	0.146993	12.9115	13.8709	12.9991	0.059812	0.073297	0.027359	1.05349	14.2605	3.75878
ENSG00000054938	ENSMUSG00000030732	CHRDL2	0.012187	0.023344	0.017424	0.00814	0.209301	0.466044	0.360074	0.017033	0.024588	0.03977	1.02713	1.34514	0.389137
ENSG00000054965	ENSMUSG00000029461	FAM168A	32.5316	28.6553	29.9164	28.098	28.8669	28.2742	28.2235	42.4992	43.0893	45.017	44.5351	29.4549	-0.596437
ENSG00000054967	ENSMUSG00000008318	RELT	1.66223	1.54525	2.10623	1.72141	5.08456	4.46413	4.2122	4.6643	4.02996	4.62911	5.44112	5.58696	0.0381594
ENSG00000054983	ENSMUSG00000021003	GALC	12.2438	15.2444	16.6238	16.2746	2.28141	2.40676	2.1665	1.89959	1.64843	1.88203	2.81002	3.28489	0.225267
ENSG00000055044	ENSMUSG00000026020	NOP58	9.95644	9.7771	10.1277	12.2459	7.69389	7.3589	10.8286	11.1767	10.9398	10.5202	11.8789	9.62712	-0.303222
ENSG00000055070	ENSMUSG00000040842	SZRD1	23.6442	22.5765	23.7681	25.5184	38.9724	41.3406	38.2922	49.0315	48.9525	46.2575	49.0805	40.5351	-0.27598
ENSG00000087510	ENSMUSG00000028640	TFAP2C	0.031003	0.077648	0.039476	0.100685	25.3374	22.3162	23.3077	0.661357	0.839953	1.09953	1.86695	24.6537	3.72305
ENSG00000055130	ENSMUSG00000029686	CUL1	16.7173	16.8531	15.861	17.4225	14.8796	15.8653	15.8948	16.5536	18.1807	18.2598	18.6647	16.5466	-0.173783
ENSG00000055147	ENSMUSG00000020523	FAM114A2	3.35746	3.38479	3.43968	4.13237	1.97138	2.18524	2.14715	1.94346	2.00839	2.07106	3.00764	3.10126	0.0442228
ENSG00000055163	ENSMUSG00000020340	CYFIP2	11.954	11.4899	10.8609	11.0526	15.8193	15.5236	14.9457	19.9676	20.0677	19.4761	20.8371	16.4295	-0.342864
ENSG00000055208	ENSMUSG00000015755	TAB2	16.8568	16.2041	15.2743	16.9875	8.2545	8.43989	7.82043	8.34419	8.78882	8.57546	9.56949	9.1716	-0.0612684
ENSG00000055211	ENSMUSG00000040006	GINM1	17.117	21.5844	24.7721	25.7426	11.9056	14.2941	16.1263	9.77391	10.2929	10.0118	11.0262	15.1086	0.454435
ENSG00000055483	ENSMUSG00000033909	USP36	2.78551	2.60254	2.76663	2.39654	4.60422	4.36719	4.86074	5.30158	5.51537	5.35549	6.39081	5.61072	-0.187814
ENSG00000055609	ENSMUSG00000038056	KMT2C	11.7418	9.99944	10.2071	7.71401	4.06022	3.92713	3.88296	5.13971	5.70212	5.18596	6.3426	4.95677	-0.355674
ENSG00000055732	ENSMUSG00000036853	MCOLN3	0.002428	0.008152	0.004637	0.007554	0.003237	0.017535	0	0	0	0.006151	1.00205	1.00692	0.00699982
ENSG00000055813	ENSMUSG00000032878	CCDC85A	0.02423	0	0.003247	0.012564	0	0.038216	0.027228	0.054672	0.064831	0.010231	1.04324	1.02181	-0.029944
ENSG00000055917	ENSMUSG00000020594	PUM2	25.9568	25.9734	24.3986	25.3459	13.4273	12.8326	13.6143	16.445	17.5754	16.6497	17.8901	14.2914	-0.324012
ENSG00000055950	ENSMUSG00000025208	MRPL43	8.28901	8.97116	8.06374	9.63434	14.8362	16.7485	15.0253	18.5207	18.4065	16.1542	18.6938	16.5367	-0.176892
ENSG00000055955	ENSMUSG00000021922	ITIH4	0.671092	0.581932	0.599356	0.474264	0.276752	0.150302	0.309113	0.208323	0.395931	0.363821	1.32269	1.24539	-0.0868804
ENSG00000055957	ENSMUSG00000006529	ITIH1	0	0	0.005293	0	0	0	0.055422	0	0	0	1	1.01847	0.0264092
ENSG00000056050	ENSMUSG00000038005	HPF1	11.9129	11.6942	11.7325	16.1101	5.38578	6.06689	6.43588	8.52341	9.21444	10.5457	10.4278	6.96285	-0.582691
ENSG00000056097	ENSMUSG00000022201	ZFR	28.0127	28.2263	27.0514	30.1359	18.1799	18.5212	17.7018	18.1446	18.6955	19.4147	19.7516	19.1343	-0.0458065
ENSG00000056277	ENSMUSG00000036916	ZNF280C	3.8489	4.14704	3.71751	3.83764	0.670849	0.850931	0.671789	1.03085	1.01731	1.22052	2.08956	1.73119	-0.271435
ENSG00000056291	ENSMUSG00000035528	NPFFR2	0.215263	0.223273	0.645049	0.38201	0.031211	0.010751	0	0.207753	0.06125	0.233135	1.16738	1.01399	-0.203234
ENSG00000197565	ENSMUSG00000031273	COL4A6	1.02585	1.04728	1.02159	0.934641	22.3525	20.2592	21.2885	0.715077	0.792044	0.774685	1.7606	22.3001	3.66291
ENSG00000056558	ENSMUSG00000026875	TRAF1	0.309192	0.374753	0.381174	0.291186	0.132978	0.04916	0.131322	0.221624	0.178039	0.113705	1.17112	1.10449	-0.0845162
ENSG00000056586	ENSMUSG00000075376	RC3H2	8.95936	8.66493	8.49974	7.94702	5.74341	5.39459	6.26004	5.20037	5.20579	4.96926	6.12514	6.79935	0.150654
ENSG00000056661	ENSMUSG00000018537	NA	17.0204	18.8608	15.9586	19.3557	20.3474	21.1571	18.9569	17.7281	18.1458	16.9522	18.6087	21.1538	0.184939
ENSG00000056736	ENSMUSG00000015966	IL17RB	3.6409	3.74555	4.74369	4.41272	2.99359	2.38755	2.85886	3.57938	3.79962	3.78166	4.72022	3.74667	-0.333247
ENSG00000056972	ENSMUSG00000019842	TRAF3IP2	3.31142	3.227	3.712	3.84628	2.42189	2.17856	2.29788	3.38413	4.10018	4.22107	4.90179	3.29945	-0.571085
ENSG00000057019	ENSMUSG00000035107	DCBLD2	8.7413	8.89396	9.10309	9.12351	7.26971	6.2381	6.24532	4.67801	4.45057	4.39943	5.50934	7.58438	0.461152
ENSG00000057252	ENSMUSG00000026600	SOAT1	20.8237	22.0841	21.8653	23.1662	7.38684	7.25181	7.04274	5.99787	5.80774	6.50365	7.10309	8.22713	0.211943
ENSG00000057294	ENSMUSG00000041957	PKP2	0.015898	0.014184	0.010121	0.01307	0.031793	0.016716	0	0.050546	0.0249	0.030206	1.03522	1.01617	-0.0267924
ENSG00000057468	ENSMUSG00000005493	MSH4	0.101323	0.114968	0.106348	0.027008	0.045951	0.031063	0	0.024239	0.022932	0.052848	1.03334	1.02567	-0.0107461
ENSG00000057593	ENSMUSG00000031443	F7	0.087603	0.072536	0.045185	0.009895	0.050885	0.09355	0.125965	0.140918	0.092986	0.142206	1.12537	1.09013	-0.0458948
ENSG00000057608	ENSMUSG00000021218	GDI2	48.4621	47.6691	45.1831	59.1986	34.028	34.4263	36.1146	46.7974	43.3566	44.8433	45.9991	35.8563	-0.35938
ENSG00000057657	ENSMUSG00000038151	PRDM1	0.099364	0.13365	0.175628	0.099918	0.403945	0.434059	0.409697	0.097475	0.127462	0.124728	1.11655	1.4159	0.342665
ENSG00000057663	ENSMUSG00000038160	ATG5	4.69974	4.92453	5.28611	5.85017	4.6962	5.49155	5.22194	3.75722	3.82129	3.93913	4.83921	6.13656	0.342658
ENSG00000057704	ENSMUSG00000020023	TMCC3	2.16252	1.95918	1.83319	2.22238	0.858892	0.564427	1.06804	1.06126	1.14772	1.13574	2.11491	1.83045	-0.208392
ENSG00000057757	ENSMUSG00000028669	PITHD1	11.3975	10.726	10.2106	12.466	17.334	20.3018	19.621	23.9262	23.1277	22.96	24.338	20.0856	-0.27705
ENSG00000058056	ENSMUSG00000056900	USP13	3.99803	4.1455	3.80968	3.55719	3.88499	4.07634	4.11646	4.6319	4.25148	4.29499	5.39279	5.02593	-0.10164
ENSG00000058063	ENSMUSG00000037400	ATP11B	7.34517	7.13184	6.49275	6.25961	3.01452	2.70522	3.09813	3.81753	3.39459	3.8692	4.69377	3.93929	-0.252813
ENSG00000058085	ENSMUSG00000026479	LAMC2	0.013032	0.021668	0.018776	0.003823	0.04915	0.060057	0.108446	0.018746	0.030744	0.047209	1.03223	1.07255	0.0552776
ENSG00000058262	ENSMUSG00000030082	SEC61A1	87.1312	95.0531	104.387	93.2937	111.57	116.12	116.101	88.3674	89.4979	84.2185	88.3613	115.597	0.387617
ENSG00000159674	ENSMUSG00000037379	SPON2	2.10417	2.45739	3.88456	2.3196	19.9786	19.4078	18.7446	0.632206	0.718711	0.588846	1.64659	20.377	3.62939
ENSG00000058335	ENSMUSG00000032356	RASGRF1	0.006478	0	0.006186	0	0.124456	0.191781	0.108348	0.041858	0.043968	0.077956	1.05459	1.14153	0.114279
ENSG00000058404	ENSMUSG00000057897	CAMK2B	0.21921	0.269255	0.367804	0.238246	0.905277	1.13317	1.03126	2.64413	2.79903	2.31453	3.5859	2.02323	-0.825672
ENSG00000058453	ENSMUSG00000040860	CROCC	2.69062	2.43618	2.45932	1.82501	6.53418	5.30761	4.95957	5.03857	5.15808	4.91996	6.03887	6.60045	0.128286
ENSG00000058600	ENSMUSG00000030880	POLR3E	2.49191	2.19577	2.22097	2.15335	3.15959	2.988	2.63214	5.17571	5.35926	5.40847	6.31448	3.92658	-0.685392
ENSG00000100234	ENSMUSG00000020044	TIMP3	22.575	27.7186	28.6085	28.3487	98.5461	97.3859	98.1035	7.50646	7.12325	7.40104	8.34358	99.0118	3.56886
ENSG00000058673	ENSMUSG00000026464	ZC3H11A	21.8977	21.1583	18.9507	19.2192	10.5184	9.46616	10.2146	10.0153	10.1142	10.3321	11.1538	11.0664	-0.0113583
ENSG00000058729	ENSMUSG00000023846	RIOK2	3.40844	3.51044	4.06187	4.34349	2.00962	2.3629	2.57097	2.18562	2.45258	2.66945	3.43588	3.3145	-0.0518908
ENSG00000058799	ENSMUSG00000057375	YIPF1	12.8368	13.7546	15.2577	16.998	6.94641	9.05006	9.78191	7.07335	7.17392	6.88573	8.04433	9.59279	0.253978
ENSG00000058804	ENSMUSG00000028614	NDC1	14.901	14.7371	16.2377	16.8931	6.47802	5.25354	5.96418	7.98921	7.08585	7.79793	8.62433	6.89858	-0.322112
ENSG00000058866	ENSMUSG00000022861	DGKG	0.376509	0.191275	0.364703	0.237299	0.473935	0.435433	0.421938	1.27885	1.25543	1.28995	2.27474	1.44377	-0.655862
ENSG00000059377	ENSMUSG00000029925	TBXAS1	0.067244	0.1044	0.11725	0.055109	0.18826	0.172128	0.156806	0.153729	0.113354	0.181938	1.14967	1.1724	0.028238
ENSG00000059378	ENSMUSG00000038507	PARP12	4.64168	6.42701	10.6266	6.80451	0.526806	0.445436	0.553156	0.515453	0.663704	0.51526	1.56481	1.50847	-0.0529013
ENSG00000059573	ENSMUSG00000025007	ALDH18A1	21.9279	22.5874	21.0405	25.1907	18.6434	19.1129	19.9517	26.2449	24.6182	24.4482	26.1038	20.236	-0.367335
ENSG00000059588	ENSMUSG00000090290	TARBP1	3.1917	3.59077	4.01867	2.7496	2.33963	2.26125	2.43293	2.35074	2.66404	3.25454	3.75644	3.3446	-0.167531
ENSG00000059691	ENSMUSG00000028085	GATB	1.41132	1.44842	1.64187	1.66797	1.61753	1.6928	1.571	2.33216	1.91002	2.44336	3.22851	2.62711	-0.297391
ENSG00000059728	ENSMUSG00000001156	MXD1	3.50265	3.81311	3.6809	4.01815	2.24658	2.0701	1.92505	2.16744	2.1297	2.01004	3.10239	3.08058	-0.0101799
ENSG00000059758	ENSMUSG00000020015	CDK17	9.79523	10.5717	11.827	11.1569	7.81501	7.68875	8.3653	5.6234	5.17333	5.82037	6.53903	8.95635	0.453834
ENSG00000059769	ENSMUSG00000070972	DNAJC25	13.4064	13.9069	12.3092	18.1531	8.21874	8.34586	9.06062	9.00633	7.31678	8.99035	9.43782	9.54174	0.0157991
ENSG00000140416	ENSMUSG00000032366	TPM1	3.21983	3.09004	2.96508	3.23404	76.7223	82.3339	75.1268	5.74711	5.79337	5.61275	6.71775	79.061	3.55692
ENSG00000060069	ENSMUSG00000033323	CTDP1	4.00306	4.09591	4.17546	3.74909	9.18356	9.75764	9.39154	10.8204	10.9235	11.0206	11.9215	10.4442	-0.190852
ENSG00000060138	ENSMUSG00000030189	YBX3	3.3792	3.5302	4.33374	4.05525	8.37412	8.7887	9.31924	9.64702	9.53181	8.32974	10.1695	9.82735	-0.0493776
ENSG00000060140	ENSMUSG00000032899	STYK1	0.018786	0	0.00897	0	0	0.044444	0	0.02312	0.009808	0.071387	1.03477	1.01481	-0.0280962
ENSG00000060237	ENSMUSG00000045962	WNK1	22.1062	19.029	18.2586	16.1697	13.4192	14.4543	13.57	19.0265	20.1402	19.6159	20.5942	14.8145	-0.475226
ENSG00000060339	ENSMUSG00000020074	CCAR1	16.9148	15.7904	15.1497	17.3788	11.3083	12.3099	12.1925	9.4238	9.4705	9.3413	10.4119	12.9369	0.313263
ENSG00000060491	ENSMUSG00000049401	OGFR	11.5954	11.1376	13.9076	10.7347	27.2731	23.8948	25.9612	21.5864	21.748	23.3181	23.2175	26.7097	0.202152
ENSG00000060566	ENSMUSG00000035041	CREB3L3	0	0	0	0	0	0.006044	0	0	0	0	1	1.00201	0.00290363
ENSG00000060642	ENSMUSG00000043257	PIGV	3.53264	3.70094	4.54192	3.68049	2.89817	2.9117	3.7082	3.16714	2.32901	2.50758	3.66791	4.17269	0.186019
ENSG00000182253	ENSMUSG00000030554	SYNM	13.908	13.5178	20.9961	13.229	154.401	152.905	154.161	12.9035	11.9481	11.8042	13.2186	154.822	3.54997
ENSG00000060688	ENSMUSG00000074088	SNRNP40	6.42173	6.73438	6.22767	7.41694	6.29022	6.81456	6.12275	10.0982	11.4328	10.1383	11.5564	7.40918	-0.641309
ENSG00000060709	ENSMUSG00000029420	RIMBP2	0.09199	0.10852	0.146696	0.084449	0.148442	0.136993	0.230515	0.602505	0.584612	0.743479	1.64353	1.17198	-0.487847
ENSG00000177469	ENSMUSG00000004044	PTRF	4.88984	5.37584	5.04988	5.98777	125.186	117.085	128.331	9.31133	9.57811	10.0547	10.648	124.534	3.54788
ENSG00000060749	ENSMUSG00000074994	QSER1	14.4766	13.6631	12.5754	12.136	5.76719	5.93765	6.13602	8.00254	8.18737	8.55676	9.24889	6.94695	-0.4129
ENSG00000060762	ENSMUSG00000023861	MPC1	16.2304	15.7364	16.8568	17.9355	6.92996	8.34657	9.57466	13.3277	12.1079	12.5645	13.6667	9.28373	-0.557888
ENSG00000060982	ENSMUSG00000030268	BCAT1	3.46492	3.62995	5.22069	3.91824	1.75075	1.73997	1.93127	4.40265	4.30502	4.33271	5.34679	2.80733	-0.929476
ENSG00000061273	ENSMUSG00000022475	HDAC7	4.048	3.54245	3.82844	3.43469	9.10252	8.47082	8.40308	7.4688	7.94922	7.81773	8.74525	9.65881	0.143346
ENSG00000124942	ENSMUSG00000069833	AHNAK	5.86979	4.59812	4.75792	3.64638	43.7883	40.5311	41.9905	2.90797	2.80219	2.63311	3.78109	43.1033	3.51092
ENSG00000061455	ENSMUSG00000069378	PRDM6	0.108931	0.082377	0.107762	0.079789	0.013677	0	0	0.063129	0.084778	0.018893	1.0556	1.00456	-0.071501
ENSG00000061492	ENSMUSG00000012282	WNT8A	0.015395	0	0	0.011974	0	0	0	0	0.004653	0.058504	1.02105	1	-0.0300568
ENSG00000061656	ENSMUSG00000038180	SPAG4	0.113066	0.113185	0.223793	0.078169	0.276556	0.147194	0	0.164965	0.263341	0.202446	1.21025	1.14125	-0.084691
ENSG00000061676	ENSMUSG00000027002	NCKAP1	39.7227	41.3829	41.932	45.3942	27.7942	29.455	30.0408	29.6517	28.7454	30.9957	30.7976	30.0967	-0.0332128
ENSG00000061794	ENSMUSG00000040112	MRPS35	14.9484	13.3078	14.1764	17.2139	9.20551	11.0234	12.584	11.7288	12.3268	12.9929	13.3495	11.9377	-0.161266
ENSG00000061918	ENSMUSG00000028005	GUCY1B3	2.53334	2.48113	1.91708	2.56252	1.06449	1.18912	1.19854	2.19418	2.06001	2.13436	3.12951	2.15072	-0.54112
ENSG00000061936	ENSMUSG00000029439	SFSWAP	6.35695	5.89531	5.38141	5.24209	6.56163	6.8231	6.47122	7.56608	7.61933	7.92005	8.70182	7.61865	-0.191782
ENSG00000108691	ENSMUSG00000035385	CCL2	12.3517	17.1612	54.645	22.8642	98.6055	107.179	104.134	7.44605	8.74108	8.48198	9.22304	104.306	3.49944
ENSG00000061987	ENSMUSG00000034602	MON2	6.15036	6.16863	5.61958	5.17102	2.24657	2.12462	2.19152	2.42394	2.69501	2.71338	3.61078	3.18757	-0.179853
ENSG00000062038	ENSMUSG00000061048	CDH3	0.257881	0.341231	0.244692	0.333172	0.797211	1.2964	1.03958	0.387494	0.326808	0.410528	1.37494	2.0444	0.572303
ENSG00000062194	ENSMUSG00000032745	GPBP1	18.7304	18.608	18.5281	19.8987	8.01631	7.3152	8.1231	9.59184	9.89347	10.0138	10.833	8.81821	-0.296881
ENSG00000062282	ENSMUSG00000030747	DGAT2	0.166827	0.351434	0.388566	0.334461	0.659131	0.728404	0.637096	0.122693	0.174195	0.121122	1.13934	1.67488	0.555861
ENSG00000062370	ENSMUSG00000052675	ZNF112	4.09809	4.03751	4.09071	3.8909	2.15605	2.15933	2.68699	2.18834	2.00591	2.11928	3.10451	3.33412	0.102943
ENSG00000062524	ENSMUSG00000027297	LTK	0.036861	0.044139	0.0352	0.022256	1.07351	0.708458	0.42656	0.011342	0.062544	0.125022	1.0663	1.73617	0.703295
ENSG00000062582	ENSMUSG00000020477	MRPS24	5.4715	6.04361	5.8131	6.27957	12.2254	11.0084	13.2117	17.675	17.506	16.2671	18.1494	13.1485	-0.46502
ENSG00000062598	ENSMUSG00000017670	ELMO2	10.2791	10.3003	10.286	9.97264	8.49492	9.49241	8.66618	9.98877	10.4771	10.349	11.2716	9.8845	-0.189453
ENSG00000062650	ENSMUSG00000041408	WAPL	10.0699	9.60623	9.73208	9.86537	5.24064	5.27341	6.83544	7.23122	7.20916	7.79256	8.41098	6.78316	-0.310316
ENSG00000062716	ENSMUSG00000018171	VMP1	8.39537	10.1721	10.4364	11.8549	5.86425	5.97344	7.12443	3.87696	3.95989	4.44519	5.09401	7.32071	0.523181
ENSG00000062725	ENSMUSG00000018481	APPBP2	11.0615	10.435	10.0703	10.7626	6.14112	5.8544	7.19707	6.15543	5.81342	6.46139	7.14341	7.39753	0.0504297
ENSG00000099860	ENSMUSG00000015312	GADD45B	0.676915	0.899229	1.69506	1.05297	22.0084	25.5363	24.2021	1.42555	1.15446	1.13373	2.23791	24.9156	3.47682
ENSG00000063015	ENSMUSG00000000632	SEZ6	15.0119	13.9315	13.5041	12.264	53.9221	54.2933	57.7939	41.0622	42.23	38.6772	41.6565	56.3365	0.435528
ENSG00000063046	ENSMUSG00000058655	EIF4B	71.7418	61.3698	48.1514	69.9428	41.3301	40.4284	41.6462	53.1731	47.4915	52.0351	51.8999	42.1349	-0.300716
ENSG00000063169	ENSMUSG00000070808	GLTSCR1	4.4482	3.97181	3.51728	3.46076	6.62286	6.36873	5.97533	6.52063	6.0699	7.04931	7.54661	7.32231	-0.0435313
ENSG00000063176	ENSMUSG00000057342	SPHK2	3.86076	3.79659	3.67861	3.76028	11.4285	10.7471	10.9189	10.8652	11.3885	11.8274	12.3604	12.0315	-0.0389016
ENSG00000063177	ENSMUSG00000059070	RPL18	58.4838	60.7403	50.0182	70.5971	79.8266	83.1968	87.1513	108.134	104.482	99.6821	105.099	84.3916	-0.316585
ENSG00000063180	ENSMUSG00000003273	CA11	4.37599	6.81697	6.83002	7.08727	8.38781	7.7409	6.74169	7.35458	6.16906	7.24813	7.92392	8.62347	0.122053
ENSG00000063245	ENSMUSG00000035203	EPN1	26.4133	27.8611	24.4851	27.5837	62.1057	60.8237	57.0188	74.4014	67.9408	73.0177	72.7866	60.9827	-0.255272
ENSG00000063322	ENSMUSG00000003444	MED29	14.3361	14.7708	13.6562	15.0295	19.769	18.3908	17.8654	20.7715	21.1667	21.559	22.1658	19.675	-0.171967
ENSG00000128591	ENSMUSG00000068699	FLNC	6.71108	7.08281	8.82392	5.54051	64.8697	69.1221	62.988	5.2931	5.07889	4.88226	6.08475	66.6599	3.45355
ENSG00000063515	ENSMUSG00000022738	GSC2	0	0	0	0	0	0	0	0.020671	0.243814	0.058766	1.10775	1	-0.147633
ENSG00000063587	ENSMUSG00000031365	ZNF275	5.22715	5.15546	5.25399	4.70679	4.8817	5.08533	4.809	7.40041	7.35623	7.318	8.35821	5.92535	-0.496295
ENSG00000063601	ENSMUSG00000015214	MTMR1	6.30863	7.09699	6.48546	6.76512	4.88442	5.037	4.1333	6.10676	6.07243	5.46616	6.88179	5.68491	-0.275646
ENSG00000063660	ENSMUSG00000034220	GPC1	55.3761	68.7048	63.6663	61.0219	70.2377	66.0858	65.9868	52.7105	53.838	53.4792	54.3426	68.4368	0.332689
ENSG00000063761	ENSMUSG00000021044	ADCK1	1.96197	2.06534	2.17624	1.85606	2.19693	1.97416	1.81253	2.76755	2.65488	2.58517	3.6692	2.99454	-0.293131
ENSG00000063854	ENSMUSG00000024158	HAGH	3.94532	4.70863	4.41008	4.36369	13.8583	14.7915	13.0531	10.1345	10.2402	9.21685	10.8639	14.901	0.45587
ENSG00000063978	ENSMUSG00000029110	RNF4	8.13617	7.94086	7.80858	8.2063	10.0427	10.309	10.0859	11.1496	12.1858	11.5578	12.6311	11.1459	-0.180465
ENSG00000064012	ENSMUSG00000026029	CASP8	0.177585	0.159888	0.271355	0.157531	0.191186	0.40607	0.19447	0.059919	0.078922	0.119677	1.08617	1.26391	0.218639
ENSG00000105974	ENSMUSG00000007655	CAV1	0.305	0.598248	1.24295	0.576726	14.5262	15.9782	15.8322	0.572811	0.488138	0.514597	1.52518	16.4456	3.43065
ENSG00000064102	ENSMUSG00000040250	ASUN	5.18362	5.05647	5.86779	6.66498	4.22657	3.51332	4.46631	6.38185	5.88816	6.27757	7.18253	5.06873	-0.502867
ENSG00000064115	ENSMUSG00000040234	TM7SF3	16.488	17.1305	21.1586	17.8958	13.8709	15.0614	14.9764	14.2549	13.8632	14.7235	15.2805	15.6363	0.0331987
ENSG00000064195	ENSMUSG00000001510	DLX3	0	0	0.011312	0.009213	0.260589	0.686612	0.910506	0.014579	0	0	1.00486	1.61924	0.688319
ENSG00000064199	ENSMUSG00000001948	SPA17	1.39532	1.47986	1.77334	1.86615	1.42769	1.93617	1.05934	1.3139	1.44347	1.38054	2.37931	2.4744	0.0565399
ENSG00000064201	ENSMUSG00000000244	TSPAN32	0.357235	0.330231	0.394414	0.301147	1.10031	0.594191	0.604648	0.502899	0.480623	0.634457	1.53933	1.76638	0.1985
ENSG00000064205	ENSMUSG00000027656	WISP2	0.01937	0.013265	0.018498	0.069447	0	0	0	0.000314	0	0.010358	1.00356	1	-0.00512304
ENSG00000064218	ENSMUSG00000042372	DMRT3	0.013473	0	0	0.010479	0	0	0	0	0	0	1	1	0
ENSG00000064225	ENSMUSG00000022747	ST3GAL6	1.28287	1.23741	1.1239	1.63317	0.472271	0.406242	0.602561	0.922054	0.820529	0.81182	1.85147	1.49369	-0.309787
ENSG00000064270	ENSMUSG00000034112	ATP2C2	0.292426	0.257777	0.302504	0.218175	0.061047	0.066272	0.072487	0.145807	0.168597	0.164884	1.15976	1.0666	-0.120808
ENSG00000064300	ENSMUSG00000000120	NGFR	0.077496	0.089887	0.229417	0.04822	1.12105	1.19785	1.10861	0.467576	0.663535	0.52027	1.55046	2.1425	0.466599
ENSG00000075426	ENSMUSG00000029135	FOSL2	0.771309	1.00397	1.40769	0.997143	24.2444	22.5848	24.2516	1.3418	1.07793	1.45384	2.29119	24.6936	3.42997
ENSG00000064313	ENSMUSG00000037343	TAF2	6.46229	5.90021	6.06836	6.31855	3.5597	3.19591	3.60186	3.98199	4.15942	4.23795	5.12645	4.45249	-0.203349
ENSG00000064393	ENSMUSG00000061436	HIPK2	37.3759	33.0773	27.3932	27.2347	14.9109	14.863	14.7871	19.2452	18.035	17.6012	19.2938	15.8537	-0.283324
ENSG00000064419	ENSMUSG00000012535	TNPO3	24.5417	23.0936	20.9493	22.9468	35.393	36.7231	34.7426	26.9585	28.3894	28.4746	28.9408	36.6196	0.339509
ENSG00000064490	ENSMUSG00000036120	RFXANK	10.2937	11.0462	11.8325	12.8384	37.3535	41.7837	41.3899	29.3117	28.7904	24.7227	28.6082	41.1757	0.525363
ENSG00000064545	ENSMUSG00000002342	TMEM161A	4.8756	6.41014	5.574	5.61372	11.8866	11.4113	9.92842	10.8606	11.1697	11.2633	12.0979	12.0755	-0.00267686
ENSG00000064547	ENSMUSG00000031861	LPAR2	9.94557	8.23436	8.48683	7.59868	4.87191	5.00169	4.54978	8.51682	9.23398	9.11148	9.9541	5.80779	-0.777301
ENSG00000131094	ENSMUSG00000045532	C1QL1	39.5372	42.1938	43.4808	43.0324	350.532	351.945	366.685	33.5056	34.1727	33.7343	34.8042	357.387	3.36016
ENSG00000064607	ENSMUSG00000036054	SUGP2	23.7285	22.4634	21.3432	19.7922	26.1947	25.8606	25.2391	29.6612	30.8115	32.842	32.1049	26.7648	-0.262456
ENSG00000076716	ENSMUSG00000031119	GPC4	32.3943	37.0695	30.72	37.787	100.749	103.48	103.482	9.07338	8.79439	9.44416	10.104	103.57	3.35762
ENSG00000064652	ENSMUSG00000024535	SNX24	3.31819	2.83624	3.13014	3.81927	3.28008	4.29886	4.36874	3.18576	3.56254	2.82136	4.18989	4.98256	0.249976
ENSG00000005884	ENSMUSG00000001507	ITGA3	2.6144	3.36586	4.52219	2.99635	46.8068	41.2149	42.9122	3.17984	3.69431	3.31772	4.39729	44.6446	3.3438
ENSG00000064687	ENSMUSG00000035722	ABCA7	1.45957	1.45618	1.70648	1.22682	3.65622	3.14603	2.67252	2.70525	2.47891	2.9636	3.71592	4.15825	0.16226
ENSG00000064692	ENSMUSG00000024534	SNCAIP	15.2833	14.882	14.7488	16.1195	8.16781	8.62157	7.23854	10.3452	11.1051	10.5173	11.6559	9.00931	-0.37157
ENSG00000064703	ENSMUSG00000027905	DDX20	4.98658	4.50874	4.8669	5.12138	2.589	3.10066	2.76334	4.88275	4.59029	5.04466	5.83923	3.81767	-0.613088
ENSG00000064726	ENSMUSG00000025103	BTBD1	20.7819	21.47	21.9858	26.2401	20.1165	19.3052	21.803	22.6115	22.4239	22.8606	23.632	21.4082	-0.142576
ENSG00000064763	ENSMUSG00000030303	FAR2	2.2502	2.4463	2.89129	2.75379	0.850449	0.601435	0.638123	1.5155	1.34514	1.02307	2.29457	1.69667	-0.435518
ENSG00000064787	ENSMUSG00000013523	BCAS1	0.024948	0.032677	0.053827	0.053524	0.002376	0.014053	0.038047	0.030704	0.015155	0.014048	1.01997	1.01816	-0.0025629
ENSG00000064835	ENSMUSG00000004842	POU1F1	0.020498	0.000481	0	0.023494	0	0	0	0	0	0	1	1	0
ENSG00000064932	ENSMUSG00000035673	SBNO2	4.75966	4.50152	4.67889	3.68255	15.4947	14.6952	12.9139	10.6727	10.5119	10.8683	11.6843	15.3679	0.395355
ENSG00000064933	ENSMUSG00000026098	PMS1	5.15505	5.16932	4.86005	6.01629	2.24156	2.28081	2.02964	2.20425	2.42013	2.45067	3.35835	3.184	-0.0769124
ENSG00000064961	ENSMUSG00000020232	HMG20B	17.903	17.7639	17.4826	19.5487	41.1232	41.8469	38.8338	42.3923	43.0395	43.5459	43.9926	41.6013	-0.0806313
ENSG00000064989	ENSMUSG00000059588	CALCRL	0.455404	0.396982	0.351425	0.530767	0	0.016512	0.033529	0.067603	0.040993	0.046414	1.05167	1.01668	-0.0488159
ENSG00000064999	ENSMUSG00000024219	ANKS1A	6.07096	5.77519	6.05796	5.11153	8.1043	7.90107	8.03322	7.23603	7.8333	6.92976	8.33303	9.01286	0.113144
ENSG00000065000	ENSMUSG00000020198	AP3D1	19.0885	17.3842	18.9823	16.1447	44.7575	45.8344	43.8186	50.018	49.1482	45.811	49.3257	45.8035	-0.106883
ENSG00000065029	ENSMUSG00000024220	ZNF76	4.07796	3.8848	3.61481	3.76959	6.90033	7.94258	5.70642	7.41023	8.08575	8.01859	8.83819	7.84978	-0.171099
ENSG00000065054	ENSMUSG00000002504	SLC9A3R2	2.10888	2.44485	2.30945	2.54715	8.14729	7.65376	7.74828	6.42253	5.19049	5.23601	6.61634	8.84978	0.419607
ENSG00000065057	ENSMUSG00000041429	NTHL1	2.86041	2.7559	2.682	2.92195	8.55399	9.04246	7.78921	15.3696	14.5925	12.8808	15.281	9.46189	-0.691535
ENSG00000065060	ENSMUSG00000039512	UHRF1BP1	5.25516	4.8254	4.98451	4.46163	3.50983	3.67973	3.70348	3.82827	4.01225	4.16861	5.00304	4.63101	-0.111477
ENSG00000065135	ENSMUSG00000000001	GNAI3	34.7911	35.3539	32.732	43.4125	20.3376	22.6191	25.7944	29.6879	29.529	29.1506	30.4558	23.917	-0.348679
ENSG00000065150	ENSMUSG00000030662	IPO5	22.8576	20.9632	19.8364	23.1292	18.1174	19.2711	19.8312	30.8174	31.5175	31.5336	32.2895	20.0732	-0.685792
ENSG00000065154	ENSMUSG00000030934	OAT	29.7398	32.2761	31.2406	38.0958	14.7192	15.7734	13.3701	14.567	13.5979	14.8407	15.3352	15.6209	0.0266324
ENSG00000065183	ENSMUSG00000033285	WDR3	8.87101	8.49757	8.38217	9.51889	6.34322	6.71581	6.84398	8.6002	9.07457	8.19205	9.62227	7.63434	-0.333875
ENSG00000065243	ENSMUSG00000004591	PKN2	17.5998	17.1055	17.4363	17.8791	5.0746	4.0272	5.29564	5.1769	5.09372	5.04163	6.10409	5.79914	-0.0739353
ENSG00000065268	ENSMUSG00000035754	WDR18	12.1483	11.9575	11.0167	12.2852	36.169	34.8171	34.915	61.2387	53.9953	54.3007	57.5116	36.3004	-0.663867
ENSG00000108821	ENSMUSG00000001506	COL1A1	0.146918	0.183533	0.214957	0.107079	13.0379	11.9165	12.4006	0.362806	0.341149	0.342722	1.34889	13.4517	3.31794
ENSG00000050165	ENSMUSG00000030772	DKK3	39.9961	50.9995	58.1083	53.9459	192.54	186.346	185.839	18.7596	18.5871	18.9549	19.7672	189.242	3.25905
ENSG00000065325	ENSMUSG00000049928	GLP2R	0	0	0	0	0	0	0	0	0	0	1	1	0
ENSG00000065328	ENSMUSG00000026669	MCM10	6.52442	6.04045	5.8924	6.57674	4.56634	5.69551	4.67706	7.51467	7.63079	8.8219	8.98912	5.97964	-0.588122
ENSG00000065357	ENSMUSG00000025357	DGKA	0.79172	0.916205	0.841705	0.733449	2.42035	2.11283	2.39095	0.896238	1.10788	1.13897	2.0477	3.30804	0.691975
ENSG00000065361	ENSMUSG00000018166	ERBB3	1.14199	1.08112	0.891739	1.01528	0.325891	0.516201	0.260858	0.43682	0.404523	0.442373	1.42791	1.36765	-0.0622013
ENSG00000065413	ENSMUSG00000052331	ANKRD44	0.671946	0.532937	0.405882	0.412502	0.476903	0.774788	0.517653	0.593046	0.656362	0.839446	1.69628	1.58978	-0.09355
ENSG00000065427	ENSMUSG00000031948	KARS	19.1167	18.3699	18.4414	21.664	20.4488	22.1624	25.5564	29.1487	30.2022	27.9412	30.0974	23.7225	-0.343381
ENSG00000065457	ENSMUSG00000031949	ADAT1	3.71892	3.7019	3.59144	3.1784	4.31098	4.5967	3.85099	4.88583	4.46573	4.50354	5.61837	5.25289	-0.0970401
ENSG00000065485	ENSMUSG00000022844	PDIA5	10.939	12.4797	14.7218	13.3611	3.97253	3.57538	4.2626	3.43084	3.68761	3.738	4.61882	4.93684	0.0960642
ENSG00000065491	ENSMUSG00000042203	TBC1D22B	5.50929	4.80351	5.0862	5.28283	4.61073	4.59793	5.99352	6.93672	6.14252	6.73631	7.60518	6.06739	-0.325906
ENSG00000065518	ENSMUSG00000022820	NDUFB4	15.7786	16.8225	17.6139	20.5241	13.8905	16.5567	17.206	15.5065	17.1099	15.6709	17.0957	16.8844	-0.0179464
ENSG00000065526	ENSMUSG00000040761	SPEN	23.1207	19.3864	19.3894	14.8873	10.674	10.322	10.0253	15.8586	16.401	15.7671	17.0089	11.3405	-0.584808
ENSG00000182871	ENSMUSG00000001435	COL18A1	1.01417	1.35281	1.41661	1.12688	31.0671	28.8137	31.3798	2.34576	2.19016	2.34618	3.29403	31.4202	3.25377
ENSG00000065548	ENSMUSG00000027091	ZC3H15	14.2853	13.7891	13.7907	17.3355	14.83	16.4965	16.1997	15.3483	15.253	15.3849	16.3287	16.8421	0.0446545
ENSG00000065559	ENSMUSG00000033352	MAP2K4	4.83776	4.94473	4.68084	5.20064	4.68398	4.59785	4.89332	4.44388	4.15999	4.2833	5.29572	5.72505	0.11246
ENSG00000065600	ENSMUSG00000026627	TMEM206	18.416	18.8078	19.0154	23.1012	13.6003	10.7713	12.1446	8.48868	7.86936	6.84157	8.7332	13.172	0.592896
ENSG00000065609	ENSMUSG00000033419	SNAP91	2.80445	2.65136	2.69436	2.65883	2.91645	2.59786	2.34858	2.92899	3.15198	3.62256	4.23451	3.62096	-0.225821
ENSG00000065613	ENSMUSG00000025060	SLK	6.88212	6.65752	7.15268	6.60109	3.87367	3.62564	4.38828	4.31112	4.75734	5.00262	5.69036	4.96253	-0.197443
ENSG00000065618	ENSMUSG00000025064	COL17A1	0.002206	0	0.009559	0.014008	0	0.006543	0.021372	0	0.002613	0	1.00087	1.0093	0.0121062
ENSG00000065621	ENSMUSG00000025069	GSTO2	0.192709	0.155349	0.289302	0.185445	0.126506	0.169208	0.136808	0.19896	0.155202	0.150245	1.16814	1.14417	-0.0299014
ENSG00000065665	ENSMUSG00000025816	SEC61A2	15.9021	18.1698	19.427	18.3165	8.16397	8.17508	8.58838	8.70804	8.24397	8.37763	9.44321	9.30914	-0.02063
ENSG00000065675	ENSMUSG00000026778	PRKCQ	0.129463	0.183207	0.332513	0.258095	0.026106	0.015441	0.034839	0.111457	0.109624	0.086809	1.10263	1.02546	-0.104675
ENSG00000065717	ENSMUSG00000034771	TLE2	7.70531	7.18964	7.01151	6.56718	11.1931	9.42415	9.99366	14.3808	14.4048	13.416	15.0672	11.2036	-0.427447
ENSG00000065802	ENSMUSG00000026311	ASB1	7.29644	6.2235	5.20019	5.35895	12.2848	10.4228	13.1266	13.7035	13.256	14.6026	14.854	12.9447	-0.198488
ENSG00000132329	ENSMUSG00000034353	RAMP1	12.8878	20.4219	18.7206	21.8622	150.313	155.425	155.596	16.0215	15.6972	14.9854	16.568	154.778	3.22373
ENSG00000065833	ENSMUSG00000032418	ME1	0.868201	0.816209	1.07828	0.777716	1.07594	0.810882	0.956834	0.857623	0.899678	0.805787	1.85436	1.94789	0.0709866
ENSG00000065882	ENSMUSG00000029174	TBC1D1	7.37804	7.4853	7.58468	7.5958	10.8436	11.8068	12.5354	9.58989	8.51455	8.72525	9.94323	12.7286	0.356282
ENSG00000065883	ENSMUSG00000041297	CDK13	7.15552	6.95254	6.76786	6.80757	6.51131	5.36203	6.09796	7.76882	8.09868	7.79551	8.88767	6.99043	-0.346423
ENSG00000065911	ENSMUSG00000005667	MTHFD2	1.69403	2.1825	2.23446	2.03534	2.17099	1.75504	2.19114	3.75837	3.01996	3.49194	4.42342	3.03905	-0.54154
ENSG00000065923	ENSMUSG00000037341	SLC9A7	0.75185	0.829301	1.11019	0.484435	1.56002	1.82284	1.43959	1.13921	1.24925	1.19339	2.19395	2.60749	0.249131
ENSG00000065970	ENSMUSG00000003154	FOXJ2	4.96785	4.53196	4.51737	4.60402	3.97018	4.00788	4.18353	5.64121	6.19751	5.92381	6.92084	5.05386	-0.453562
ENSG00000065978	ENSMUSG00000028639	YBX1	334.241	328.772	273.261	414.205	312.069	341.878	340.163	508.043	505.059	471.669	495.924	332.37	-0.577329
ENSG00000065989	ENSMUSG00000032177	PDE4A	0.706632	0.708499	0.928404	0.733263	0.539101	0.309207	0.516762	1.17482	1.19408	1.59632	2.32174	1.45502	-0.674166
ENSG00000066032	ENSMUSG00000063063	CTNNA2	1.11167	1.00219	0.830375	0.983677	1.85048	1.47885	1.31217	2.80732	3.15076	2.52305	3.82704	2.54717	-0.587336
ENSG00000066056	ENSMUSG00000033191	TIE1	0.034959	0.042556	0.041292	0.026157	0.129776	0.162921	0.150451	0.023322	0.002508	0.039557	1.0218	1.14772	0.167659
ENSG00000066084	ENSMUSG00000023026	DIP2B	30.0944	28.785	26.6707	26.097	15.6637	14.8522	16.9235	23.9475	24.403	24.4401	25.2635	16.8131	-0.58747
ENSG00000066117	ENSMUSG00000023018	SMARCD1	36.671	36.0913	30.7727	36.6928	22.5758	22.4707	21.3998	32.4947	32.884	34.5687	34.3158	23.1488	-0.567939
ENSG00000066135	ENSMUSG00000033326	KDM4A	22.0279	20.6549	21.4467	19.5973	22.4565	22.4801	22.9809	23.5291	23.5157	24.0551	24.6999	23.6392	-0.0633276
ENSG00000066185	ENSMUSG00000070806	ZMYND12	0.061692	0.106474	0.106688	0.076622	0	0	0	0	0	0.046399	1.01547	1	-0.0221424
ENSG00000066230	ENSMUSG00000036123	SLC9A3	3.16002	2.28179	2.09874	1.70727	2.69305	3.20648	2.88251	5.79333	5.80666	6.61911	7.07303	3.92735	-0.848774
ENSG00000066248	ENSMUSG00000026259	NGEF	0.04117	0.076648	0.053758	0.016678	1.23176	0.946081	0.966939	0.299884	0.211361	0.331572	1.28094	2.04826	0.677197
ENSG00000066279	ENSMUSG00000033952	ASPM	18.656	14.9317	13.3038	12.8942	3.60321	3.15049	3.52212	3.84064	4.15184	4.06876	5.02041	4.42527	-0.182039
ENSG00000066294	ENSMUSG00000038147	CD84	0	0	0	0	0	0	0	0	0	0	1	1	0
ENSG00000066322	ENSMUSG00000006390	ELOVL1	20.9064	27.5619	30.5308	31.2562	26.3188	26.5284	29.1042	19.8829	21.7257	19.9801	21.5296	28.3172	0.395357
ENSG00000066336	ENSMUSG00000002111	SPI1	0.031088	0.013869	0.016797	0	0	0	0	0	0.040577	0.01969	1.02009	1	-0.028695
ENSG00000066379	ENSMUSG00000036315	ZNRD1	1.9117	1.85275	2.03606	2.34564	1.78089	1.9167	2.49222	2.85007	3.0155	2.55814	3.8079	3.06327	-0.313923
ENSG00000066382	ENSMUSG00000016386	MPPED2	12.4362	12.5389	10.5273	13.2758	3.5725	4.012	3.92724	6.28643	6.61642	6.7612	7.55468	4.83725	-0.643184
ENSG00000066405	ENSMUSG00000032473	CLDN18	0.056103	0.055315	0.066969	0.03765	0.021356	0.002841	0	0.005105	0.049206	0.021707	1.02534	1.00807	-0.0245118
ENSG00000066422	ENSMUSG00000022601	ZBTB11	3.62987	3.9063	3.23598	3.68295	2.78446	2.48358	2.75624	3.18796	3.28107	3.2159	4.22831	3.67476	-0.202431
ENSG00000066455	ENSMUSG00000021192	GOLGA5	8.68405	8.51075	9.11765	9.79118	7.01601	8.12829	7.19455	5.80463	6.09438	6.10913	7.00272	8.44628	0.270402
ENSG00000159248	ENSMUSG00000068615	GJD2	0	0	0.074415	0	7.40635	8.32165	9.95141	0.041103	0.017436	0.021152	1.02656	9.5598	3.21916
ENSG00000066583	ENSMUSG00000024601	ISOC1	6.09802	6.85666	6.2163	8.08153	4.95619	5.9641	6.69736	8.52155	9.27405	8.38828	9.72796	6.87255	-0.501292
ENSG00000066629	ENSMUSG00000058070	EML1	1.13042	1.14669	1.10929	1.28827	5.30954	6.40055	4.71745	2.16497	2.30676	2.53083	3.33419	6.47585	0.957734
ENSG00000066651	ENSMUSG00000019792	TRMT11	3.81217	3.85833	4.07034	4.71243	2.28741	2.1789	1.90885	2.21015	2.50399	2.26754	3.32722	3.12506	-0.0904377
ENSG00000066654	ENSMUSG00000030942	THUMPD1	7.50446	7.45053	7.17122	7.9388	5.14207	4.69637	6.82343	5.65559	5.89927	6.27604	6.94363	6.55396	-0.0833236
ENSG00000149090	ENSMUSG00000027188	PAMR1	0.182603	0.171575	0.197607	0.177349	10.1702	10.2771	11.5539	0.214457	0.261604	0.28689	1.25432	11.6671	3.21747
ENSG00000066739	ENSMUSG00000041341	ATG2B	4.44322	4.12574	4.0277	3.58258	2.55829	2.11734	2.5845	2.1755	2.4123	2.49209	3.35996	3.42004	0.0255688
ENSG00000066777	ENSMUSG00000067851	ARFGEF1	7.95458	7.52543	8.77001	7.28096	6.86919	7.41821	7.4936	4.18726	4.37201	4.67525	5.41151	8.26033	0.610169
ENSG00000066827	ENSMUSG00000022335	ZFAT	0.949994	0.936123	0.847016	0.824233	1.3212	1.40008	1.44536	1.59441	1.70234	1.74697	2.68124	2.38888	-0.166566
ENSG00000066855	ENSMUSG00000027601	MTFR1	3.17808	3.10284	2.9	3.49253	2.26668	2.79865	1.99568	2.82611	2.79549	3.04212	3.8879	3.35367	-0.213252
ENSG00000066926	ENSMUSG00000024588	FECH	3.8557	4.36831	4.8695	4.99561	4.74952	4.48509	5.00675	5.66563	5.62853	6.10021	6.79812	5.74712	-0.242297
ENSG00000066933	ENSMUSG00000039585	MYO9A	3.04686	2.70599	2.45944	2.26292	2.2683	2.26899	2.31911	2.07396	1.92699	1.84042	2.94712	3.28547	0.156791
ENSG00000067057	ENSMUSG00000021196	PFKP	4.41587	4.17412	5.54534	3.93401	20.6358	20.1508	20.2979	17.8014	17.8433	16.9834	18.5427	21.3615	0.204164
ENSG00000168081	ENSMUSG00000045731	PNOC	0.068074	0.107977	0.07147	0.059371	8.52814	9.56717	10.181	0.169033	0.101632	0.134133	1.13493	10.4254	3.19943
ENSG00000067082	ENSMUSG00000000078	KLF6	10.04	9.82722	10.4099	10.4559	10.1642	11.0401	10.1867	17.6889	17.4047	18.4485	18.8474	11.4637	-0.717291
ENSG00000067113	ENSMUSG00000021759	PLPP1	6.86025	7.61569	7.52622	9.256	8.81533	11.3086	10.6911	5.28278	5.24462	4.62663	6.05134	11.2717	0.897375
ENSG00000067141	ENSMUSG00000032340	NEO1	39.9041	39.2642	43.7129	36.4752	40.7555	41.3676	39.9348	23.1953	23.1287	23.2693	24.1978	41.6859	0.784686
ENSG00000067167	ENSMUSG00000025935	TRAM1	37.2851	43.1554	44.9402	49.6657	16.2031	14.9297	16.2799	14.0495	12.6467	13.8268	14.5076	16.8042	0.212011
ENSG00000184500	ENSMUSG00000022912	PROS1	5.88767	6.48606	5.12624	7.34911	25.5229	24.8114	27.7455	2.0216	1.83085	2.25971	3.03738	27.0266	3.15348
ENSG00000185274	ENSMUSG00000034040	WBSCR17	4.48766	5.76743	7.79281	5.97695	94.5821	89.4113	83.8801	10.1189	8.65143	9.43955	10.4033	90.2912	3.11754
ENSG00000067191	ENSMUSG00000020882	CACNB1	3.54848	3.50345	3.50847	2.92546	3.38085	2.64474	2.77992	4.81973	5.24566	5.5424	6.2026	3.93517	-0.656445
ENSG00000156675	ENSMUSG00000031488	RAB11FIP1	0.036843	0.029884	0.038382	0.018236	8.6195	8.32662	8.56149	0.084317	0.094428	0.133644	1.10413	9.50254	3.1054
ENSG00000067221	ENSMUSG00000032333	STOML1	1.84067	2.05365	2.18142	2.00206	3.61973	3.05119	2.9572	4.3123	4.47977	4.32076	5.37094	4.20937	-0.35157
ENSG00000067334	ENSMUSG00000039756	DNTTIP2	6.50806	5.61389	6.16362	7.30704	4.23064	4.17605	4.59669	4.89852	5.19112	4.88372	5.99112	5.33446	-0.167483
ENSG00000067365	ENSMUSG00000039345	METTL22	1.78308	1.73954	1.62402	1.47185	1.69694	1.76987	1.59124	2.60574	2.9701	2.70142	3.75908	2.68602	-0.484913
ENSG00000067369	ENSMUSG00000043909	TP53BP1	13.9986	11.7827	12.6535	10.4437	12.5532	11.865	11.7149	13.6689	14.0994	14.6063	15.1248	13.0444	-0.213493
ENSG00000067445	ENSMUSG00000025272	TRO	16.0835	15.5133	14.4871	13.6079	14.535	14.3344	12.5183	14.0847	15.0492	15.2939	15.8093	14.7959	-0.0955745
ENSG00000067533	ENSMUSG00000001305	RRP15	2.17839	2.29127	1.96602	2.30576	1.23304	1.40208	1.64252	2.14903	2.16053	2.06151	3.12369	2.42588	-0.364742
ENSG00000067560	ENSMUSG00000007815	RHOA	110.997	114.109	107.748	131.409	129.152	137.685	138.349	145.717	142.539	145.2	145.485	136.062	-0.0966082
ENSG00000067596	ENSMUSG00000034931	DHX8	7.5994	6.65742	7.13589	6.55432	6.74978	6.63957	6.38722	8.07901	8.1748	8.44348	9.23243	7.59219	-0.282194
ENSG00000067606	ENSMUSG00000029053	PRKCZ	2.4521	2.25853	2.14663	2.13437	7.25621	7.15576	7.15792	5.75746	5.47259	5.44004	6.5567	8.18996	0.320888
ENSG00000067704	ENSMUSG00000026618	IARS2	18.6388	19.1136	19.1796	20.6621	15.7798	17.2977	15.9175	17.5998	16.2892	15.944	17.611	17.3316	-0.0230669
ENSG00000067715	ENSMUSG00000035864	SYT1	11.8579	12.9593	12.1401	13.3401	5.67891	5.74423	6.30208	7.85719	7.94394	7.64624	8.81579	6.90841	-0.351736
ENSG00000067798	ENSMUSG00000020181	NAV3	4.91878	4.85036	4.29507	4.17223	2.01532	1.70795	1.86065	2.09912	2.45889	2.2989	3.28564	2.86131	-0.199499
ENSG00000067836	ENSMUSG00000022540	ROGDI	4.27232	4.74414	4.27211	4.90471	13.477	13.7761	11.6831	12.3313	11.8806	12.1733	13.1284	13.9787	0.0905387
ENSG00000067840	ENSMUSG00000002006	PDZD4	25.0556	22.6489	22.9948	20.3857	38.6932	36.2853	36.9399	50.4352	50.6378	51.2036	51.7589	38.3061	-0.434231
ENSG00000067842	ENSMUSG00000031376	ATP2B3	0.072569	0.036859	0.05227	0.025753	0.099599	0.08921	0.069877	0.24171	0.248788	0.228456	1.23965	1.08623	-0.190607
ENSG00000067900	ENSMUSG00000024290	ROCK1	8.89705	7.4702	6.98192	7.12011	5.99729	6.39689	7.83365	6.35523	5.89992	6.37046	7.20854	7.74261	0.103114
ENSG00000067955	ENSMUSG00000031885	CBFB	11.7259	12.9722	11.4385	14.1857	13.8099	12.1599	14.5486	13.5603	12.008	13.339	13.9691	14.5061	0.0544213
ENSG00000067992	ENSMUSG00000035232	PDK3	1.57986	1.53848	1.3715	1.41923	3.40616	2.1301	2.84946	1.23508	1.56004	1.67347	2.48953	3.79524	0.608317
ENSG00000068001	ENSMUSG00000010047	HYAL2	11.5456	12.1393	13.9417	11.8689	26.5103	28.3127	26.9176	20.1249	19.9906	19.0311	20.7155	28.2469	0.447379
ENSG00000068024	ENSMUSG00000026313	HDAC4	4.29691	3.83852	3.43468	3.21087	3.23899	2.82057	3.02858	3.44754	3.53274	3.68113	4.5538	4.02938	-0.176514
ENSG00000068028	ENSMUSG00000010067	RASSF1	2.21362	2.02577	1.76068	2.07889	5.17653	4.91615	3.97798	6.53845	6.22876	6.25281	7.34001	5.69022	-0.367296
ENSG00000163430	ENSMUSG00000022816	FSTL1	41.8489	48.0789	49.9072	53.002	94.1894	94.108	94.6139	10.1111	10.1636	10.5128	11.2625	95.3038	3.08101
ENSG00000068079	ENSMUSG00000010358	IFI35	9.55469	14.6343	30.7091	16.3531	2.60772	3.39427	2.89274	2.30686	1.88507	2.83337	3.34177	3.96491	0.246677
ENSG00000068097	ENSMUSG00000000976	HEATR6	6.67502	5.33896	6.33153	5.41967	4.652	4.87465	4.44165	5.97812	6.52674	6.40105	7.30197	5.6561	-0.368479
ENSG00000068120	ENSMUSG00000001755	COASY	8.30876	7.09204	8.20841	7.75152	15.9236	18.2859	15.5459	20.1672	19.5334	18.831	20.5105	17.5851	-0.222008
ENSG00000068137	ENSMUSG00000035172	PLEKHH3	6.66793	6.59003	6.57714	5.9496	20.3262	18.9252	20.6462	15.9183	15.9157	17.6588	17.4976	20.9659	0.260885
ENSG00000068305	ENSMUSG00000030557	MEF2A	4.04405	4.21259	3.8987	3.86626	3.43695	3.32845	3.35555	2.92017	3.13983	3.01695	4.02565	4.37365	0.119615
ENSG00000068308	ENSMUSG00000031154	OTUD5	14.8337	16.0204	14.8071	16.6162	24.9452	26.9429	26.7028	25.4974	25.0883	24.0479	25.8779	27.197	0.0717258
ENSG00000068323	ENSMUSG00000000134	TFE3	12.692	13.5725	14.5139	14.0624	29.0326	27.7536	26.9816	17.9112	19.4471	19.6151	19.9911	28.9226	0.532839
ENSG00000068354	ENSMUSG00000039201	TBC1D25	2.90773	3.22551	2.89976	2.89461	4.8176	5.17303	4.42965	5.89956	5.84829	5.67316	6.807	5.80676	-0.229287
ENSG00000068366	ENSMUSG00000031278	ACSL4	2.33363	2.7287	2.53266	3.06708	1.70308	1.35674	1.9997	2.12568	2.11061	2.20946	3.14858	2.68651	-0.228971
ENSG00000068383	ENSMUSG00000025477	INPP5A	4.82827	4.6289	4.44716	4.88859	6.52585	7.92308	6.57974	7.76474	8.13949	7.05921	8.65448	8.00956	-0.111724
ENSG00000068394	ENSMUSG00000031148	GPKOW	13.6206	14.2652	14.4489	13.7479	15.8326	17.1265	15.735	21.2669	21.1028	19.8644	21.7447	17.2314	-0.335626
ENSG00000068400	ENSMUSG00000031153	GRIPAP1	10.0596	8.30426	9.63288	8.27455	12.1613	10.8339	12.1943	13.8766	13.8685	13.4503	14.7318	12.7298	-0.210721
ENSG00000068489	ENSMUSG00000020493	PRR11	9.42685	8.05107	8.17062	8.00971	13.2266	13.0429	13.3967	14.2371	12.9686	14.2407	14.8154	14.2221	-0.0589688
ENSG00000068615	ENSMUSG00000052852	REEP1	7.94863	8.91016	6.84365	9.92911	3.91331	4.37103	3.94311	5.92903	5.59274	5.24584	6.5892	5.07582	-0.376465
ENSG00000068650	ENSMUSG00000031441	ATP11A	6.96737	6.85233	6.83807	6.03022	12.221	10.9672	10.6513	5.41839	6.03642	5.26788	6.57423	12.2798	0.901395
ENSG00000068654	ENSMUSG00000049553	POLR1A	6.68255	5.87997	6.526	4.94421	9.16764	9.68877	9.41843	12.7736	12.5152	12.9151	13.7346	10.4249	-0.397779
ENSG00000068724	ENSMUSG00000036918	TTC7A	1.69734	1.67958	1.76194	1.44386	7.42559	6.86055	6.10209	4.25193	4.49955	4.23467	5.32872	7.79608	0.548961
ENSG00000068745	ENSMUSG00000032599	IP6K2	17.7761	18.7929	18.3616	19.7776	17.2954	18.4778	18.279	17.8161	19.6306	19.0653	19.8373	19.0174	-0.0608977
ENSG00000068793	ENSMUSG00000030447	NA	20.3875	19.524	19.097	20.0067	23.3949	24.7428	23.7333	33.1712	32.9179	32.0479	33.7123	24.957	-0.433833
ENSG00000068796	ENSMUSG00000021693	KIF2A	22.1558	20.2721	18.3114	20.3062	10.9246	13.6476	11.6488	13.1593	13.5617	14.375	14.6986	13.0737	-0.16902
ENSG00000068831	ENSMUSG00000032946	RASGRP2	1.07191	1.08549	1.13886	0.817256	0.548592	0.457135	0.49886	1.17111	1.31465	1.5252	2.33699	1.50153	-0.638218
ENSG00000068878	ENSMUSG00000040850	PSME4	7.11829	5.96409	6.0868	5.88971	4.41776	3.79479	4.28071	5.60886	5.54876	5.78663	6.64808	5.16442	-0.364333
ENSG00000068903	ENSMUSG00000015149	SIRT2	13.3433	13.5223	12.9966	14.8763	12.6744	11.9035	11.5471	14.7441	14.1385	14.3177	15.4001	13.0417	-0.239811
ENSG00000068912	ENSMUSG00000020311	ERLEC1	27.9311	30.9868	36.6033	40.923	13.3936	13.4222	17.5287	11.9695	10.6874	12.3851	12.6807	15.7815	0.315603
ENSG00000068971	ENSMUSG00000024777	PPP2R5B	8.05509	7.72075	7.89999	8.00624	12.7479	12.1939	11.0977	11.9712	11.7623	12.7009	13.1448	13.0132	-0.014515
ENSG00000069011	ENSMUSG00000021506	PITX1	0	0.013282	0.007108	0.005789	0.02977	0	0.068863	0.013741	0.017486	0	1.01041	1.03288	0.03173
ENSG00000069018	ENSMUSG00000021541	TRPC7	0	0	0	0.015663	0	0.005433	0	0	0.007885	0.102037	1.03664	1.00181	-0.0493055
ENSG00000069020	ENSMUSG00000034751	MAST4	1.75623	1.68436	2.01647	1.40718	1.25592	1.2397	1.19297	1.60505	1.7362	1.63433	2.65853	2.22953	-0.253888
ENSG00000069122	ENSMUSG00000056492	ADGRF5	0	0	0	0	0	0.007552	0	0	0	0	1	1.00252	0.00362718
ENSG00000069188	ENSMUSG00000041592	SDK2	7.06099	6.12913	6.75356	4.62794	8.95989	9.36569	8.34658	10.9101	11.1002	10.3442	11.7848	9.89072	-0.252785
ENSG00000069206	ENSMUSG00000022056	ADAM7	0	0	0	0.001175	0.00302	0	0	0	0	0	1	1.00101	0.00145158
ENSG00000069248	ENSMUSG00000039509	NUP133	18.7004	18.6732	18.1256	19.5396	9.7207	10.4376	10.5552	13.1944	13.6375	13.7501	14.5274	11.2378	-0.370411
ENSG00000069275	ENSMUSG00000026434	NUCKS1	67.4916	57.903	57.2374	64.6955	40.9834	40.6553	47.2944	54.1371	52.434	54.9882	54.8531	43.9777	-0.318801
ENSG00000069329	ENSMUSG00000031696	VPS35	19.7647	19.3901	19.5718	21.426	13.276	12.9498	13.9402	13.0845	12.7292	12.5946	13.8028	14.3887	0.059978
ENSG00000069345	ENSMUSG00000031701	DNAJA2	12.0437	12.3893	12.0913	14.8904	10.6046	9.98373	11.1809	9.96588	9.24756	10.0305	10.748	11.5898	0.108783
ENSG00000069399	ENSMUSG00000053175	BCL3	1.92509	1.85625	2.036	1.86575	3.86135	4.93851	4.29733	3.38749	3.67683	3.1125	4.39227	5.36573	0.288807
ENSG00000069424	ENSMUSG00000028931	KCNAB2	1.35515	1.36903	1.38551	1.18456	1.38661	0.974989	1.16531	1.42884	1.57157	1.79749	2.5993	2.17564	-0.256685
ENSG00000069431	ENSMUSG00000030249	ABCC9	11.235	9.68986	8.88075	8.89827	1.0702	1.09238	1.20949	1.17933	1.20199	1.2204	2.20057	2.12402	-0.0510812
ENSG00000069482	ENSMUSG00000024907	GAL	0.837878	1.89827	3.82085	2.06568	0	0.039019	0.123249	0.255702	0.129159	0.031337	1.13873	1.05409	-0.111432
ENSG00000069509	ENSMUSG00000025040	FUNDC1	6.04009	6.75214	7.80848	9.77442	5.96135	6.9797	6.09449	4.93716	5.56439	5.8351	6.44555	7.34518	0.188494
ENSG00000069535	ENSMUSG00000040147	MAOB	3.62733	4.26584	4.08044	4.72989	9.40351	11.1228	7.11246	6.53396	7.18106	7.71999	8.145	10.2129	0.32641
ENSG00000069667	ENSMUSG00000032238	RORA	1.25016	1.20147	1.40459	1.17311	0.239235	0.212578	0.230021	0.908733	0.977135	1.01701	1.96762	1.22728	-0.680993
ENSG00000115363	ENSMUSG00000035104	EVA1A	0.01172	0	0	0	7.23126	6.64019	9.13511	0	0	0.096501	1.03217	8.66886	3.07017
ENSG00000069702	ENSMUSG00000029287	TGFBR3	0.107773	0.059684	0.194139	0.049138	0.019819	0.020515	0.007935	0.098338	0.168927	0.188297	1.15185	1.01609	-0.18093
ENSG00000069712	ENSMUSG00000044060	KIAA1107	1.98546	2.20368	2.32185	1.88142	0.297108	0.307803	0.618892	0.530788	0.544488	0.546289	1.54052	1.40793	-0.129839
ENSG00000069764	ENSMUSG00000022683	PLA2G10	0.124518	0.118731	0.11909	0.0587	0	0.022788	0.19537	0.099671	0.164755	0.164228	1.14288	1.07272	-0.0914072
ENSG00000069812	ENSMUSG00000028940	HES2	0	0.015921	0.0284	0.027757	0.023791	0.007036	0.112181	0.007321	0.021738	0.011301	1.01345	1.04767	0.0479038
ENSG00000069849	ENSMUSG00000032412	ATP1B3	38.2237	40.8683	41.6303	46.9774	52.8646	56.1775	58.1905	31.1081	28.4697	28.7724	30.4501	56.7442	0.898027
ENSG00000069869	ENSMUSG00000032216	NEDD4	2.60261	2.65083	2.45521	2.57733	1.61466	1.24171	1.71344	1.63353	1.54324	1.76299	2.64659	2.52327	-0.0688398
ENSG00000069943	ENSMUSG00000079469	PIGB	2.52574	3.26527	3.4416	3.37568	1.45601	1.77373	1.29841	0.86628	0.781456	0.68766	1.77847	2.50938	0.496701
ENSG00000069974	ENSMUSG00000032202	RAB27A	0.419092	0.485785	0.608651	0.497897	0.994213	0.915626	1.3456	0.404464	0.397067	0.396831	1.39945	2.08515	0.575285
ENSG00000069998	ENSMUSG00000058979	CECR5	5.01306	5.58795	5.07199	5.40219	10.9747	11.199	11.5542	18.8947	18.1751	18.4147	19.4948	12.2426	-0.671183
ENSG00000070010	ENSMUSG00000005262	UFD1L	4.01973	4.3045	3.85103	4.20698	3.88295	4.36099	3.46604	5.64509	5.21975	5.37327	6.4127	4.90333	-0.387171
ENSG00000070018	ENSMUSG00000030201	LRP6	17.0903	16.1473	17.3904	14.0275	5.66381	4.95651	5.23882	4.43457	4.50907	4.50812	5.48392	6.28638	0.197022
ENSG00000070019	ENSMUSG00000042638	GUCY2C	0.023459	0.010057	0.005431	0.003199	0	0.01882	0	0	0.000663	0.003698	1.00145	1.00627	0.00692656
ENSG00000070047	ENSMUSG00000038611	PHRF1	10.7185	9.53374	9.46129	7.91829	23.5178	21.3962	20.9596	28.1576	26.4286	26.3219	27.9694	22.9578	-0.284861
ENSG00000070061	ENSMUSG00000028431	IKBKAP	8.73909	7.89702	7.92759	8.46079	6.90308	6.87524	7.02492	10.0693	11.1511	11.5064	11.9089	7.93442	-0.58585
ENSG00000070081	ENSMUSG00000030659	NUCB2	4.50098	4.64327	4.89956	5.33392	2.10681	2.27797	2.52986	2.40752	2.0839	2.44089	3.31077	3.30488	-0.00256789
ENSG00000070159	ENSMUSG00000038764	PTPN3	0.126414	0.178774	0.198104	0.14662	0.179346	0.251079	0.230691	0.629895	0.600488	0.499237	1.57654	1.22037	-0.369441
ENSG00000070182	ENSMUSG00000021061	SPTB	0.22346	0.198686	0.212519	0.167373	0.530172	0.450512	0.499847	0.829533	0.962319	0.89921	1.89702	1.49351	-0.345028
ENSG00000070190	ENSMUSG00000028159	DAPP1	0.038893	0.037856	0.013506	0.0605	0	0.013942	0.008344	0.031062	0.025843	0	1.01897	1.00743	-0.0164315
ENSG00000070193	ENSMUSG00000021732	FGF10	0	0	0	0.008308	0	0	0	0	0	0	1	1	0
ENSG00000070214	ENSMUSG00000028412	SLC44A1	8.98028	8.91648	9.32376	9.28681	7.24073	7.08764	7.82117	3.30165	3.23093	3.41274	4.31511	8.38318	0.958101
ENSG00000070269	ENSMUSG00000036339	TMEM260	4.44303	4.55345	4.77989	4.25444	2.24199	2.03324	2.27322	1.43572	1.27193	1.69031	2.46598	3.18282	0.36814
ENSG00000070366	ENSMUSG00000038290	SMG6	5.77649	5.42284	5.71677	5.18051	8.65086	8.51126	7.51423	9.4462	9.33362	9.02652	10.2688	9.22545	-0.154573
ENSG00000070367	ENSMUSG00000061244	EXOC5	16.4425	15.8403	14.306	17.1712	7.0999	7.22377	8.1006	7.46891	7.40226	8.20081	8.69066	8.47475	-0.0362948
ENSG00000070388	ENSMUSG00000020327	FGF22	0.183298	0.159847	0.185813	0.0878	0.712058	0.564861	0.706771	0.373152	0.514829	0.864599	1.58419	1.66123	0.0685034
ENSG00000107731	ENSMUSG00000020099	UNC5B	4.73783	5.86401	5.75856	4.90986	32.2252	32.3831	32.2991	3.16084	2.8604	3.22653	4.08259	33.3025	3.02807
ENSG00000070444	ENSMUSG00000000282	MNT	7.37302	7.10735	6.85768	6.10588	7.87621	7.63779	6.71344	9.35956	9.71111	9.91755	10.6627	8.40915	-0.342547
ENSG00000070476	ENSMUSG00000034430	ZXDC	4.18463	3.82557	3.58831	2.93979	4.54389	5.01011	4.21443	5.80498	6.11089	5.75767	6.89118	5.58948	-0.302038
ENSG00000154319	ENSMUSG00000035095	FAM167A	0.965187	1.12886	1.36753	1.16298	14.9452	15.8714	17.8739	1.15024	1.22655	0.975351	2.11738	17.2302	3.02458
ENSG00000070501	ENSMUSG00000031536	POLB	3.13791	3.31991	3.05449	3.86072	1.52447	1.92453	1.94127	1.80498	1.83733	1.97528	2.87253	2.79675	-0.0385698
ENSG00000070526	ENSMUSG00000009588	ST6GALNAC1	0	0.008322	0	0	0	0	0	0	0	0	1	1	0
ENSG00000070540	ENSMUSG00000041895	WIPI1	2.93072	2.2661	2.57195	2.69593	3.38492	3.72088	3.47473	3.22289	3.54826	3.40583	4.39233	4.52684	0.0435199
ENSG00000070601	ENSMUSG00000035615	FRMPD1	1.15824	1.01269	1.04092	1.07234	1.71455	1.79088	1.62326	0.664423	0.672992	0.528614	1.62201	2.70956	0.740278
ENSG00000070610	ENSMUSG00000028467	GBA2	14.2271	13.4029	13.0004	12.6537	19.0521	17.303	16.0989	23.9377	26.4369	25.5111	26.2952	18.4847	-0.508472
ENSG00000070614	ENSMUSG00000054008	NDST1	28.8664	29.0915	30.8467	25.8992	27.1079	25.3906	23.9301	36.6885	35.7644	35.9262	37.1264	26.4762	-0.487748
ENSG00000070669	ENSMUSG00000029752	ASNS	3.80668	4.65356	5.09993	4.25518	2.87863	2.38509	2.54009	5.18261	5.67478	5.99482	6.6174	3.60127	-0.877759
ENSG00000070718	ENSMUSG00000031539	AP3M2	5.0117	5.6364	5.29778	5.60706	4.11806	3.32376	5.12382	4.49129	4.89443	5.1856	5.8571	5.18854	-0.174858
ENSG00000070729	ENSMUSG00000031789	CNGB1	0	0	0.005086	0	0	0	0	0.006554	0.016682	0.013492	1.01224	1	-0.0175552
ENSG00000070731	ENSMUSG00000057286	ST6GALNAC2	5.14815	4.93764	4.64974	5.89168	3.49223	3.74298	4.51038	2.93529	2.39859	2.36829	3.56739	4.9152	0.462381
ENSG00000070748	ENSMUSG00000021919	CHAT	0.025254	0.009256	0.013427	0	0	0	0	0.526572	0.672625	0.619761	1.60632	1	-0.683759
ENSG00000070759	ENSMUSG00000033985	TESK2	0.34777	0.286555	0.266934	0.319714	0.208801	0.41329	0.333031	0.193425	0.237755	0.357094	1.26276	1.31837	0.0621815
ENSG00000070761	ENSMUSG00000031796	CFAP20	13.4818	13.4516	12.3478	14.3595	15.4027	18.1691	18.5936	13.1766	12.7584	13.1738	14.0362	18.3885	0.389648
ENSG00000070770	ENSMUSG00000046707	CSNK2A2	10.6442	9.63234	9.24206	10.0361	10.3732	10.8861	11.3895	11.5243	11.1605	10.8454	12.1767	11.8829	-0.0352405
ENSG00000070778	ENSMUSG00000021009	PTPN21	7.32853	6.71425	5.48902	6.27939	8.49759	7.43703	8.27443	8.02003	8.44802	8.32476	9.26427	9.06968	-0.0306245
ENSG00000070785	ENSMUSG00000028683	EIF2B3	2.79518	2.65975	2.91933	3.1201	2.83405	4.34815	3.68305	6.18131	6.2577	6.39041	7.27647	4.62175	-0.6548
ENSG00000060718	ENSMUSG00000027966	COL11A1	26.0696	23.7544	24.1649	23.0182	123.2	123.006	122.998	15.1635	13.9044	14.7627	15.6102	124.068	2.99057
ENSG00000070814	ENSMUSG00000024613	TCOF1	3.70241	3.36966	3.59638	3.23369	6.79103	6.57743	6.65309	8.86994	8.77616	8.96598	9.87069	7.67385	-0.363201
ENSG00000070882	ENSMUSG00000029822	OSBPL3	2.30001	2.35275	2.67049	2.12907	3.46172	3.40846	3.55133	1.84646	2.05222	2.18052	3.0264	4.47383	0.563908
ENSG00000070886	ENSMUSG00000028661	EPHA8	0	0.005356	0.005732	0	0	0.004734	0	0.010838	0.021936	0	1.01092	1.00158	-0.0134007
ENSG00000070915	ENSMUSG00000031766	SLC12A3	0	0.004643	0.005198	0.004048	0	0	0.00229	0.006405	0	0	1.00213	1.00076	-0.00197603
ENSG00000070950	ENSMUSG00000030254	RAD18	3.30583	2.91345	2.64392	2.98638	2.02437	1.55944	1.91678	2.69665	2.36787	2.58279	3.5491	2.83353	-0.324854
ENSG00000121068	ENSMUSG00000000093	TBX2	0.016003	0.011899	0.010188	0.012447	12.2491	11.5033	13.7716	0.721146	0.675377	0.715934	1.70415	13.508	2.98669
ENSG00000070985	ENSMUSG00000009246	TRPM5	0	0.007243	0.027131	0	0	0	0.02022	0.009267	0.003764	0.025706	1.01291	1.00674	-0.00881817
ENSG00000071051	ENSMUSG00000066877	NCK2	16.0502	15.91	13.874	15.8768	24.2773	24.6583	24.9733	40.3949	40.1593	40.1267	41.227	25.6363	-0.6854
ENSG00000071054	ENSMUSG00000026074	MAP4K4	70.6117	65.6366	60.3756	65.5878	49.9517	50.387	50.3566	52.6327	52.2042	50.3879	52.7416	51.2318	-0.0419025
ENSG00000071073	ENSMUSG00000026110	MGAT4A	1.64745	1.71952	1.83157	1.73334	0.602078	0.675505	0.687336	1.19734	1.1721	1.2684	2.21261	1.65497	-0.418944
ENSG00000071127	ENSMUSG00000005103	WDR1	17.93	17.5533	17.416	17.7337	70.9614	74.3439	70.7322	58.322	55.4105	53.7688	56.8338	73.0125	0.361395
ENSG00000071189	ENSMUSG00000020590	SNX13	5.92406	5.80973	5.6058	5.62841	1.75313	1.76511	1.84399	1.66394	1.81723	1.98461	2.82193	2.78741	-0.0177541
ENSG00000071205	ENSMUSG00000037148	ARHGAP10	0.029892	0.032005	0.005709	0.016275	0.386924	0.338278	0.426551	0.083031	0.040576	0.081408	1.06834	1.38392	0.37339
ENSG00000071242	ENSMUSG00000023809	RPS6KA2	6.42823	5.57782	5.67885	5.36025	17.3323	16.6896	15.2343	13.3909	13.2827	12.976	14.2165	17.4187	0.293069
ENSG00000071243	ENSMUSG00000029670	ING3	4.10453	4.13209	3.8588	5.08806	2.11543	1.78034	2.11745	2.33299	2.21905	2.27532	3.27579	3.00441	-0.12476
ENSG00000071246	ENSMUSG00000021256	VASH1	27.0011	23.7798	24.6289	21.563	20.6437	21.833	18.4178	41.8029	38.6611	40.0724	41.1788	21.2982	-0.951172
ENSG00000162576	ENSMUSG00000029070	MXRA8	6.71179	8.46509	8.11754	7.78033	43.3289	40.4198	42.8459	4.45685	4.27818	4.61594	5.45033	43.1982	2.98656
ENSG00000071462	ENSMUSG00000005378	WBSCR22	5.42494	5.80672	6.09945	6.14581	6.50676	7.0426	6.52023	8.47626	8.10602	8.12392	9.2354	7.68986	-0.264217
ENSG00000071537	ENSMUSG00000020964	SEL1L	20.8189	21.2796	22.6854	21.4913	9.10708	9.02303	9.4617	6.68892	6.62974	6.4145	7.57772	10.1973	0.428347
ENSG00000071539	ENSMUSG00000021569	TRIP13	5.25492	4.8467	4.51365	5.83658	7.85673	7.85152	6.42864	11.688	11.679	11.5587	12.6419	8.37896	-0.593372
ENSG00000071553	ENSMUSG00000019087	ATP6AP1	44.3028	49.8397	58.0838	52.3703	64.7012	62.693	62.4002	39.2034	38.947	34.5757	38.5754	64.2648	0.736349
ENSG00000071564	ENSMUSG00000020167	TCF3	52.4011	48.7899	41.7636	46.9832	58.6191	56.3891	56.6465	91.6048	88.3381	87.8675	90.2701	58.2182	-0.632778
ENSG00000112164	ENSMUSG00000024027	GLP1R	0.010358	0.009241	0	0	7.43756	6.68888	6.44	0	0.005408	0	1.0018	7.85548	2.9711
ENSG00000071626	ENSMUSG00000069565	DAZAP1	7.81659	7.26144	6.27285	6.62668	8.2707	8.2486	8.63644	12.1139	12.9254	13.4591	13.8328	9.38525	-0.559624
ENSG00000071655	ENSMUSG00000035478	MBD3	25.5234	25.8324	22.7904	24.9087	72.9034	70.2901	66.6493	93.6064	88.5607	85.4432	90.2035	70.9476	-0.346429
ENSG00000071677	ENSMUSG00000090550	PRLH	0	0	0	0	0	0	0	0	0	0	1	1	0
ENSG00000071794	ENSMUSG00000002428	HLTF	9.96189	9.39088	9.79699	9.22032	6.26967	5.91982	6.14771	5.35107	5.69988	5.85053	6.63383	7.1124	0.100495
ENSG00000071889	ENSMUSG00000031399	FAM3A	4.5188	4.67361	4.90092	4.82053	8.85652	9.05403	9.15036	8.72829	9.28251	9.27695	10.0959	10.0203	-0.0108459
ENSG00000071894	ENSMUSG00000034022	CPSF1	25.611	22.5783	22.0881	19.6955	47.2969	43.3396	40.5072	62.5456	66.3255	69.2634	67.0448	44.7146	-0.584381
ENSG00000071909	ENSMUSG00000042064	MYO3B	0.117148	0.100236	0.155908	0.09641	0.057269	0.052351	0.01097	0.077876	0.073393	0.056883	1.06938	1.0402	-0.0399237
ENSG00000071967	ENSMUSG00000027015	CYBRD1	15.0984	17.325	17.7474	17.5289	9.78272	8.56169	9.37819	6.15828	6.01953	6.34299	7.1736	10.2409	0.513568
ENSG00000071991	ENSMUSG00000047216	CDH19	0	0	0	0	0	0	0	0	0	0	1	1	0
ENSG00000071994	ENSMUSG00000014771	PDCD2	5.13957	5.0244	4.74993	6.05932	5.25432	4.83845	4.80567	5.68746	5.74785	5.79717	6.74416	5.96615	-0.176839
ENSG00000072041	ENSMUSG00000019894	SLC6A15	0.011277	0.00342	0.010769	0.029236	0.04761	0.029643	0.115034	0.167702	0.137371	0.173178	1.15942	1.0641	-0.123772
ENSG00000072042	ENSMUSG00000066441	RDH11	34.3727	36.5418	36.8525	42.4994	22.7234	22.6154	21.45	17.5087	18.1505	17.087	18.5821	23.2629	0.324123
ENSG00000072062	ENSMUSG00000005469	PRKACA	11.1145	11.2356	10.8143	12.346	11.5285	13.0675	13.9232	15.5476	15.1566	15.0466	16.2503	13.8397	-0.23165
ENSG00000072071	ENSMUSG00000013033	ADGRL1	15.9345	16.7315	18.1273	13.1215	24.4589	22.7605	21.1466	21.4015	20.1026	21.0456	21.8499	23.7886	0.122646
ENSG00000072080	ENSMUSG00000026295	SPP2	0	0	0	0	0	0	0	0	0	0	1	1	0
ENSG00000072110	ENSMUSG00000015143	ACTN1	9.23759	9.86249	10.1854	9.19647	47.1479	44.9157	43.0514	24.3585	23.4367	22.3575	24.3843	46.0384	0.916886
ENSG00000072121	ENSMUSG00000066440	ZFYVE26	4.22613	3.89152	5.17283	3.4116	4.29154	4.01376	4.23843	3.85751	3.94235	3.78409	4.86131	5.18124	0.0919516
ENSG00000072133	ENSMUSG00000025665	RPS6KA6	0.919042	1.08004	0.922528	0.696357	0.567514	0.140416	0.077325	0.336234	0.340263	0.317212	1.33124	1.26175	-0.0773387
ENSG00000138119	ENSMUSG00000048612	MYOF	0.151364	0.169612	0.234886	0.197192	9.56282	9.6846	9.38731	0.32316	0.324558	0.399372	1.34903	10.5449	2.96655
ENSG00000072135	ENSMUSG00000026126	PTPN18	1.55343	1.63122	1.70595	1.48628	2.82669	2.72188	2.28167	3.93236	3.62413	4.03553	4.86401	3.61008	-0.430115
ENSG00000101670	ENSMUSG00000053846	LIPG	20.7298	23.3527	25.0386	23.6382	32.7884	29.9443	32.3673	3.22148	3.10314	3.45842	4.26101	32.7	2.94002
ENSG00000072182	ENSMUSG00000033007	ASIC4	1.8638	1.63269	1.5806	1.44789	0.314445	0.209162	0.030519	0.274992	0.466457	0.535415	1.42562	1.18471	-0.267059
ENSG00000168899	ENSMUSG00000073002	VAMP5	2.63099	4.06422	5.93334	4.02593	30.4548	33.2284	31.6222	3.43142	2.43967	4.10055	4.32388	32.7685	2.92191
ENSG00000072201	ENSMUSG00000029228	LNX1	2.24632	2.07646	2.07867	2.74904	0.977116	1.00477	1.04185	0.839882	0.803413	1.00062	1.8813	2.00791	0.0939623
ENSG00000072210	ENSMUSG00000010025	ALDH3A2	12.9702	13.2475	12.2581	14.3955	10.3906	9.90123	11.15	11.1412	10.848	10.5572	11.8488	11.4806	-0.0455462
ENSG00000072274	ENSMUSG00000022797	TFRC	23.3769	24.9741	39.1209	25.2239	8.49339	6.97993	9.13219	9.85921	10.4494	10.8348	11.3811	9.20184	-0.306649
ENSG00000137558	ENSMUSG00000067780	PI15	0.258302	0.596049	0.752904	0.412495	7.72462	7.43687	8.27591	0.151784	0.20327	0.19925	1.18477	8.81247	2.89494
ENSG00000072315	ENSMUSG00000041710	TRPC5	0.022032	0.019657	0.01578	0.02142	0.003672	0	0	0	0.005751	0.036629	1.01413	1.00122	-0.0184731
ENSG00000072364	ENSMUSG00000049470	AFF4	24.5482	23.1348	21.288	20.9723	16.3715	15.5822	18.1472	10.8998	11.1566	11.5509	12.2024	17.7003	0.536605
ENSG00000072401	ENSMUSG00000019927	UBE2D1	15.8799	15.7325	14.3118	18.8029	6.26146	6.84821	7.77902	9.12221	8.12913	9.41686	9.8894	7.9629	-0.31259
ENSG00000072415	ENSMUSG00000021112	MPP5	7.67917	8.14302	7.91874	8.25023	6.99486	6.93113	7.27942	4.98386	4.89619	5.19595	6.02533	8.06847	0.421254
ENSG00000072422	ENSMUSG00000019944	RHOBTB1	3.99451	3.45223	3.43234	3.75503	3.75313	3.90811	4.25169	3.33569	3.64838	3.71433	4.56613	4.97098	0.122556
ENSG00000072501	ENSMUSG00000041133	SMC1A	18.763	16.1375	16.6745	15.6803	20.2493	20.8369	19.5827	27.2132	26.6028	26.9664	27.9275	21.223	-0.396058
ENSG00000072506	ENSMUSG00000025260	HSD17B10	26.8533	25.6533	26.528	31.1783	40.988	47.9133	43.2457	67.8862	62.8802	61.9338	65.2334	45.049	-0.534117
ENSG00000072518	ENSMUSG00000024969	MARK2	8.19647	7.65068	7.42824	7.66067	10.8319	10.6391	11.7274	12.4305	12.631	12.3794	13.4803	12.0661	-0.159891
ENSG00000072571	ENSMUSG00000020330	HMMR	4.32096	4.03491	4.23902	5.19618	2.33947	2.20821	2.67262	2.81214	2.41647	2.83689	3.6885	3.40677	-0.11463
ENSG00000072609	ENSMUSG00000014668	CHFR	4.62164	4.68174	5.24346	4.58721	6.67462	7.44837	7.36403	7.93034	8.84768	8.12246	9.30016	8.16234	-0.188274
ENSG00000072657	ENSMUSG00000050663	TRHDE	0.004705	0.0506	0.026251	0.036115	0.006273	0	0.033488	0.059492	0.014287	0.033173	1.03565	1.01325	-0.0315421
ENSG00000072682	ENSMUSG00000018906	P4HA2	0.611761	0.478916	0.770956	0.53671	1.52974	1.34376	1.42157	0.340879	0.370371	0.379681	1.36364	2.43169	0.834492
ENSG00000072736	ENSMUSG00000031902	NFATC3	5.99512	5.55645	5.51822	5.67675	5.11104	5.29851	6.32597	5.34548	5.69374	5.19258	6.4106	6.57851	0.0373005
ENSG00000072756	ENSMUSG00000013736	TRNT1	3.59024	3.93957	3.24382	4.21309	2.24663	1.97062	2.66555	2.50692	2.6092	2.57209	3.56274	3.29427	-0.113029
ENSG00000072778	ENSMUSG00000018574	ACADVL	21.6354	21.1599	19.0907	21.4405	75.6621	69.9156	69.2668	35.2751	35.0699	40.1188	37.8212	72.6148	0.941067
ENSG00000072786	ENSMUSG00000020272	STK10	1.25728	1.36769	1.28433	1.16807	5.66538	5.23513	5.16761	2.86618	2.76535	3.20088	3.94413	6.35604	0.68842
ENSG00000072803	ENSMUSG00000020271	FBXW11	15.9988	15.9831	15.9065	16.8657	16.788	16.8075	17.883	18.3531	17.8306	18.1924	19.1253	18.1595	-0.0747581
ENSG00000072818	ENSMUSG00000001588	ACAP1	0.169531	0.201908	0.16184	0.137423	0.362458	0.362971	0.282626	0.252215	0.224517	0.300735	1.25916	1.33602	0.0854832
ENSG00000072832	ENSMUSG00000029121	CRMP1	67.9509	69.107	60.1591	68.3999	63.5862	70.4632	64.0363	106.033	106.707	103.081	106.274	67.0286	-0.664939
ENSG00000072840	ENSMUSG00000029122	EVC	9.01816	8.14069	9.12389	6.93124	8.50467	8.11818	7.83292	10.0587	9.54689	10.2855	10.9637	9.15192	-0.260588
ENSG00000072849	ENSMUSG00000018442	DERL2	8.38542	8.8139	9.44239	9.44979	3.96164	3.38576	3.98504	2.97762	3.17709	3.50342	4.21938	4.77748	0.17922
ENSG00000072858	ENSMUSG00000022696	SIDT1	0.033788	0.032953	0.030038	0.003099	0	0.005437	0	0.002097	0.00416	0.019789	1.00868	1.00181	-0.00985914
ENSG00000072864	ENSMUSG00000022678	NDE1	5.02283	4.64318	4.74522	4.72878	6.29109	6.90433	6.31806	8.68392	8.14548	8.00524	9.27822	7.5045	-0.306092
ENSG00000072952	ENSMUSG00000005611	MRVI1	0.206695	0.251063	0.572793	0.2783	0.487133	0.355643	0.27732	0.337903	0.390012	0.421751	1.38322	1.37337	-0.0103173
ENSG00000072954	ENSMUSG00000031791	TMEM38A	2.36377	2.48023	2.55839	2.83858	3.36339	3.6839	3.41503	2.98357	2.81809	3.27646	4.02604	4.48744	0.15653
ENSG00000072958	ENSMUSG00000003033	AP1M1	12.4163	12.6923	12.9581	12.8866	31.652	33.2895	32.0135	41.42	42.7878	37.9493	41.719	33.3183	-0.32439
ENSG00000073009	ENSMUSG00000004221	NA	1.91459	1.72018	1.90224	1.74075	5.00343	4.48501	4.63064	5.71949	6.12915	5.64022	6.82962	5.70636	-0.259235
ENSG00000073050	ENSMUSG00000051768	XRCC1	9.9694	9.86052	10.8175	11.3197	18.4208	17.4139	17.0314	23.5733	21.3612	22.0385	23.3243	18.6221	-0.324823
ENSG00000073060	ENSMUSG00000037936	SCARB1	5.19116	5.54365	6.44149	4.96553	12.0166	10.6565	9.62919	13.308	13.8913	13.4323	14.5439	11.7674	-0.305613
ENSG00000073067	ENSMUSG00000029541	CYP2W1	0.047918	0.056301	0.05035	0.022551	0.180418	0.055118	0.04062	0.148423	0.032626	0.158121	1.11306	1.09205	-0.0274855
ENSG00000073111	ENSMUSG00000002870	MCM2	18.7225	18.9915	18.7581	19.2671	32.8598	33.0734	31.2111	60.2923	59.0581	57.1332	59.8279	33.3814	-0.841772
ENSG00000073146	ENSMUSG00000015365	MOV10L1	0.00468	0	0.002911	0.00728	0	0	0	0.03509	0.027407	0.023713	1.02874	1	-0.0408737
ENSG00000129521	ENSMUSG00000035105	EGLN3	0.393326	0.476815	0.494551	0.435085	11.0081	12.8297	12.5677	0.801433	0.740846	0.865974	1.80275	13.1352	2.86516
ENSG00000073169	ENSMUSG00000035757		8.85479	9.10617	9.58548	7.89407	22.3869	23.812	22.3955	27.5937	26.4898	26.4771	27.8535	23.8648	-0.222975
ENSG00000073282	ENSMUSG00000022510	TP63	0	0.011549	0.024721	0.003356	0	0.047636	0	0	0.006758	0	1.00225	1.01588	0.0194818
ENSG00000073331	ENSMUSG00000028028	ALPK1	0.055793	0.077963	0.147938	0.07321	0.12941	0.116619	0.039598	0.076792	0.076703	0.104824	1.08611	1.09521	0.0120409
ENSG00000073350	ENSMUSG00000020782	LLGL2	0.036597	0.04349	0.015533	0.028152	0.140942	0.116394	0.189504	0.092077	0.157101	0.072112	1.1071	1.14895	0.0535306
ENSG00000073464	ENSMUSG00000000605	CLCN4	3.33414	3.84899	4.79629	3.81073	3.6425	3.63642	3.75029	1.71343	1.71389	1.8293	2.75221	4.6764	0.764809
ENSG00000073536	ENSMUSG00000020692	NLE1	2.1083	2.15666	2.16497	2.07877	3.55911	3.96137	3.53204	6.23492	6.49916	6.15929	7.29779	4.68417	-0.639665
ENSG00000073578	ENSMUSG00000021577	SDHA	6.48398	6.01874	6.6381	6.64786	14.2457	15.0164	14.5182	18.479	17.4144	16.2341	18.3758	15.5934	-0.236871
ENSG00000073598	ENSMUSG00000018844	FNDC8	0.46753	0.619932	0.50863	0.540174	0.8907	0.723096	0.806201	1.94106	1.36163	1.83246	2.71172	1.80667	-0.585877
ENSG00000073614	ENSMUSG00000030180	KDM5A	7.616	6.49709	6.64393	5.53332	5.26194	5.53528	6.1373	4.62943	4.5285	4.85759	5.67184	6.64484	0.228418
ENSG00000073670	ENSMUSG00000020926	ADAM11	2.35192	2.24452	2.43774	1.80791	4.28545	2.78246	3.05201	2.99569	2.76897	2.98847	3.91771	4.37331	0.158715
ENSG00000073711	ENSMUSG00000043154	PPP2R3A	4.05947	3.63718	3.31904	3.48665	2.47392	2.69001	2.73555	2.509	2.04343	2.29518	3.28254	3.63316	0.146414
ENSG00000073712	ENSMUSG00000037712	FERMT2	21.0218	21.6864	20.5193	23.9536	19.0274	19.3308	19.1258	13.532	13.9454	13.8126	14.7633	20.1613	0.449572
ENSG00000073734	ENSMUSG00000027048	ABCB11	0.093655	0.062671	0.041737	0.038849	0.073222	0.07687	0.026662	0.042264	0.065194	0.025704	1.04439	1.05892	0.019934
ENSG00000073737	ENSMUSG00000027068	DHRS9	0.008574	0	0	0.006669	0	0	0	0	0	0.001929	1.00064	1	-0.000927355
ENSG00000073754	ENSMUSG00000015854	CD5L	0	0	0	0	0	0	0	0	0	0	1	1	0
ENSG00000073756	ENSMUSG00000032487	PTGS2	0.012208	0.005446	0.011658	0.004747	0	0.004814	0	0.003756	0	0	1.00125	1.0016	0.000508065
ENSG00000073803	ENSMUSG00000033618	MAP3K13	2.55248	2.77721	2.83749	3.43911	1.75805	1.9663	1.85555	1.60547	1.52545	1.41709	2.516	2.85997	0.184867
ENSG00000164171	ENSMUSG00000015533	ITGA2	6.21285	5.93769	6.30297	5.07193	23.6771	23.553	24.209	2.31461	2.25727	2.69249	3.42146	24.813	2.85841
ENSG00000073861	ENSMUSG00000001444	TBX21	0	0.021955	0	0	0.032807	0.009639	0	0.045427	0	0.031169	1.02553	1.01415	-0.0161034
ENSG00000073910	ENSMUSG00000056602	FRY	1.70467	1.20334	1.31083	0.988777	0.589156	0.55681	0.583553	1.35771	1.38073	1.20334	2.31392	1.57651	-0.553611
ENSG00000073921	ENSMUSG00000039361	PICALM	22.4183	22.9295	21.4801	25.7543	13.8049	14.5303	15.2745	15.0248	14.8616	15.5276	16.138	15.5366	-0.0547927
ENSG00000073969	ENSMUSG00000034187	NSF	10.0923	9.74699	10.4292	11.5739	10.7259	11.4055	10.3581	11.3674	11.2095	11.1125	12.2298	11.8298	-0.0479726
ENSG00000163637	ENSMUSG00000030020	PRICKLE2	0.726048	0.852091	0.866986	0.689267	9.7462	10.1047	10.3819	0.537262	0.522057	0.533878	1.53107	11.0776	2.85503
ENSG00000074054	ENSMUSG00000064302	CLASP1	18.8652	17.2555	14.989	14.8397	9.8577	9.44496	9.43288	12.6718	13.9952	13.2393	14.3021	10.5785	-0.43509
ENSG00000074071	ENSMUSG00000038880	MRPS34	21.5235	21.5357	21.7316	23.2821	66.486	78.8132	62.8562	95.4321	94.9809	84.0872	92.5001	70.3851	-0.394183
ENSG00000074181	ENSMUSG00000038146	NOTCH3	42.2899	40.5758	43.5578	31.5957	57.2254	53.4531	51.6941	56.5528	59.1437	53.2396	57.312	55.1242	-0.0561517
ENSG00000074201	ENSMUSG00000025439	CLNS1A	17.1539	18.976	17.8216	23.6222	13.2403	14.394	14.8565	14.9314	15.1723	14.9892	16.031	15.1636	-0.0802501
ENSG00000074211	ENSMUSG00000029120	PPP2R2C	0.024476	0.006239	0.01173	0.008159	0.18647	0.140628	0.241383	0.173068	0.25105	0.186019	1.20338	1.18949	-0.0167435
ENSG00000074219	ENSMUSG00000030796	TEAD2	30.3202	28.8702	24.5578	32.0544	26.5942	24.715	26.0549	27.7078	24.8634	27.1063	27.5592	26.788	-0.0409458
ENSG00000074266	ENSMUSG00000030619	EED	2.32349	2.24103	2.35242	2.64916	2.19428	1.97401	2.03002	3.07501	2.93995	2.6717	3.89555	3.0661	-0.345422
ENSG00000074276	ENSMUSG00000034918	CDHR2	0.517925	0.55519	0.338709	0.448155	0.347743	0.254126	0.358079	0.716977	0.639842	0.763499	1.70677	1.31998	-0.370752
ENSG00000075429	ENSMUSG00000040373	CACNG5	2.69784	2.00696	3.15598	1.30755	13.76	13.3218	13.9568	1.03541	0.965756	1.15499	2.05205	14.6796	2.83867
ENSG00000074356	ENSMUSG00000020783	NCBP3	8.84177	8.11866	7.92726	7.40479	5.20654	5.24109	5.49435	6.1149	7.1459	7.12414	7.79498	6.31399	-0.303992
ENSG00000074370	ENSMUSG00000020788	ATP2A3	0.200245	0.228594	0.299697	0.255022	0.178067	0.107124	0.123347	0.422947	0.413544	0.449273	1.42859	1.13618	-0.330399
ENSG00000135046	ENSMUSG00000024659	ANXA1	4.69384	5.32409	6.4789	6.59287	45.847	49.6468	41.6772	5.58512	5.65706	5.44378	6.56199	46.7237	2.83195
ENSG00000074416	ENSMUSG00000033174	MGLL	3.12267	3.55844	3.40752	3.44319	3.49091	3.68655	3.76296	2.41297	2.28559	2.40406	3.36754	4.64681	0.464545
ENSG00000074527	ENSMUSG00000020019	NTN4	6.51994	6.84136	7.81377	6.88738	0.735918	1.31625	0.681289	1.53655	1.30291	1.18512	2.34153	1.91115	-0.293006
ENSG00000074582	ENSMUSG00000026172	BCS1L	5.20322	5.20744	5.02553	5.37836	6.78495	6.5718	7.07929	9.68141	9.75394	9.78699	10.7408	7.81201	-0.459332
ENSG00000172175	ENSMUSG00000032688	MALT1	2.17928	2.13078	2.09212	1.8223	18.5262	17.582	20.8058	1.6777	1.95319	1.79815	2.80968	19.9714	2.82946
ENSG00000074603	ENSMUSG00000032393	DPP8	5.46688	5.31813	5.26137	5.11957	3.08159	3.07167	3.42191	3.484	3.42998	3.76705	4.56034	4.19172	-0.121598
ENSG00000074621	ENSMUSG00000034452	SLC24A1	1.27473	1.34464	1.95864	1.41961	0.655867	0.736153	0.573998	0.508276	0.557907	0.535423	1.53387	1.65534	0.109952
ENSG00000074657	ENSMUSG00000042439	ZNF532	18.8242	17.8642	17.6124	15.893	10.7596	10.3225	10.0235	13.9931	14.5815	15.0549	15.5431	11.3685	-0.451234
ENSG00000074660	ENSMUSG00000038188	SCARF1	0.274715	0.340203	0.407981	0.251712	0.20749	0.255658	0.156996	0.187755	0.269132	0.281855	1.24625	1.20671	-0.0465058
ENSG00000074695	ENSMUSG00000041891	LMAN1	9.46637	10.3406	10.6646	10.5291	4.72864	5.02632	6.20897	5.62635	4.79533	6.1403	6.52066	6.32131	-0.0447939
ENSG00000074696	ENSMUSG00000033629	HACD3	48.9078	51.6398	54.3475	58.6901	25.789	26.7943	26.0959	21.6703	21.8874	22.5118	23.0231	27.2264	0.241923
ENSG00000074755	ENSMUSG00000055670	ZZEF1	5.47627	4.71957	5.3125	3.87333	5.17741	4.8408	4.88603	6.16309	6.5751	6.13016	7.28945	5.96808	-0.288543
ENSG00000074771	ENSMUSG00000023802	NOX3	0	0	0.01504	0	0	0	0	0	0.005464	0	1.00182	1	-0.00262524
ENSG00000074803	ENSMUSG00000027202	SLC12A1	0.042619	0.050464	0.053056	0.033478	0.001718	0.002862	0	0.013557	0.014999	0.014973	1.01451	1.00153	-0.0185818
ENSG00000074842	ENSMUSG00000019579	MYDGF	16.7106	19.3997	22.5415	22.1905	40.6148	40.396	42.3386	44.1958	40.5169	40.0892	42.6007	42.1165	-0.0164908
ENSG00000074855	ENSMUSG00000034863	ANO8	19.4378	16.2793	16.7322	13.4827	20.8961	18.2902	17.4636	25.638	27.1116	29.8413	28.5303	19.8833	-0.520939
ENSG00000074935	ENSMUSG00000019845	TUBE1	2.37386	2.60563	2.76119	2.23359	0.781968	0.63786	1.02311	1.21501	1.30221	1.38913	2.30212	1.81431	-0.343538
ENSG00000074964	ENSMUSG00000040964	ARHGEF10L	7.25149	7.02497	7.96316	6.51868	8.6552	8.08294	7.99927	13.1106	13.1586	13.3853	14.2181	9.2458	-0.620863
ENSG00000074966	ENSMUSG00000054892	TXK	0.009263	0.005655	0.007565	0	0	0.007305	0	0.022801	0	0	1.0076	1.00243	-0.00741481
ENSG00000075035	ENSMUSG00000063430	WSCD2	0.051888	0.027006	0.037471	0.019074	0.708341	0.546052	1.02981	0.32991	0.421442	0.491189	1.41418	1.7614	0.316756
ENSG00000175920	ENSMUSG00000044716	DOK7	0.088126	0.068618	0.044756	0.0263	8.37653	7.42424	8.69095	0.313962	0.264859	0.319014	1.29928	9.16391	2.81825
ENSG00000075073	ENSMUSG00000020081	TACR2	0.190876	0.099421	0.177141	0.095782	0.485785	0.562242	0.660985	0.125805	0.165563	0.105301	1.13222	1.56967	0.471304
ENSG00000075089	ENSMUSG00000019948	ACTR6	7.22619	6.80064	6.83344	8.52228	3.43181	2.16269	2.94048	3.4448	3.08178	3.54916	4.35858	3.845	-0.180877
ENSG00000075131	ENSMUSG00000032397	TIPIN	2.53895	2.85201	2.67819	3.14096	1.67907	2.00364	2.08301	2.25374	2.54106	2.13662	3.31047	2.92191	-0.180128
ENSG00000075142	ENSMUSG00000003161	SRI	37.7066	35.0633	34.9578	44.548	16.4885	18.6237	19.9589	36.2609	33.4504	37.6005	36.7706	19.357	-0.925696
ENSG00000075151	ENSMUSG00000028760	EIF4G3	23.5338	20.5172	20.5941	19.3586	16.8821	15.1259	15.8138	17.1206	18.7805	17.4057	18.769	16.9406	-0.147863
ENSG00000075188	ENSMUSG00000035351	NUP37	3.27896	3.72384	4.01556	3.87235	3.13977	2.61898	3.52063	3.5954	3.64714	2.99622	4.41292	4.09313	-0.10853
ENSG00000075213	ENSMUSG00000028883	SEMA3A	10.904	11.9952	13.5611	11.522	3.5172	4.12803	4.20343	3.31454	3.25795	3.78614	4.45288	4.94955	0.15256
ENSG00000075218	ENSMUSG00000022385	GTSE1	11.2588	9.56266	9.3397	9.83813	13.1819	11.7639	11.1173	15.4521	14.1222	14.9689	15.8478	13.021	-0.283436
ENSG00000075223	ENSMUSG00000028780	SEMA3C	0.035917	0.064092	0.083297	0.05188	2.05243	1.9094	1.51547	0.376592	0.521096	0.413822	1.43717	2.82577	0.975412
ENSG00000075234	ENSMUSG00000035944	TTC38	5.37845	5.66556	5.98681	5.71031	8.7039	8.86723	8.76734	10.0305	9.91777	10.8424	11.2636	9.77949	-0.203833
ENSG00000075239	ENSMUSG00000032047	ACAT1	6.64508	6.5516	6.53474	8.87172	4.60583	5.92359	4.84562	7.70739	6.82679	7.01014	8.18144	6.12501	-0.417642
ENSG00000075240	ENSMUSG00000035900	GRAMD4	14.2914	15.5537	15.0632	14.0477	18.6197	18.608	18.3671	14.127	14.7008	14.4024	15.41	19.5316	0.341939
ENSG00000129654	ENSMUSG00000034227	FOXJ1	1.62338	2.13686	2.1324	1.60067	25.5552	24.9837	28.8951	2.70052	3.16567	2.97033	3.94551	27.478	2.79999
ENSG00000075290	ENSMUSG00000036961	WNT8B	0.005009	0.004022	0.014542	0.020882	0.233478	0	0	0.023427	0.00795	0.048222	1.02653	1.07783	0.0703443
ENSG00000075292	ENSMUSG00000030016	ZNF638	13.7961	11.6661	11.7927	12.1371	4.30667	4.28198	4.91517	5.40821	5.45323	5.58577	6.4824	5.50127	-0.236763
ENSG00000075303	ENSMUSG00000054099	SLC25A40	4.28442	5.00083	4.41704	4.54134	1.02149	1.60367	1.31992	1.76738	1.61758	2.00583	2.79693	2.31502	-0.272818
ENSG00000075336	ENSMUSG00000024645	TIMM21	5.42933	5.52936	5.49376	6.76342	3.77938	3.87626	4.25314	5.03825	4.36578	5.16024	5.85476	4.96959	-0.236482
ENSG00000184557	ENSMUSG00000053113	SOCS3	2.96832	3.1628	3.61447	3.33322	21.4032	20.8894	20.2329	1.98203	2.19343	2.24929	3.14159	21.8418	2.79753
ENSG00000075388	ENSMUSG00000050917	FGF4	0	0	0	0	0	0	0	0	0	0	1	1	0
ENSG00000075391	ENSMUSG00000070565	RASAL2	5.77631	5.59877	4.89887	4.76838	4.90295	4.48097	4.77662	3.14668	3.15442	3.39312	4.23141	5.72018	0.434924
ENSG00000075399	ENSMUSG00000001062	VPS9D1	8.95664	8.72872	7.87128	8.40077	16.0801	12.6842	14.6383	17.2939	17.234	17.9148	18.4809	15.4675	-0.256792
ENSG00000075413	ENSMUSG00000007411	MARK3	11.8198	11.4243	11.8052	11.778	12.1121	11.3981	12.0148	11.7428	12.1446	11.7055	12.8643	12.8417	-0.00254207
ENSG00000075415	ENSMUSG00000061904	SLC25A3	37.5286	36.5319	33.5872	42.1709	46.3309	51.4859	50.479	58.8648	57.7925	55.6971	58.4515	50.4319	-0.212902
ENSG00000075420	ENSMUSG00000039286	FNDC3B	2.54325	2.51986	3.14843	2.67158	6.87413	6.52534	6.9943	3.2262	3.32984	3.48822	4.34809	7.79792	0.842708
ENSG00000163251	ENSMUSG00000045005	FZD5	4.3814	4.45252	4.47978	3.99776	13.359	14.274	13.818	1.10649	1.1284	1.25445	2.16311	14.817	2.77608
ENSG00000197956	ENSMUSG00000001025	S100A6	9.6462	11.1181	16.6725	12.8561	44.2482	55.3276	51.4276	6.36326	6.77329	6.43316	7.52324	51.3345	2.7705
ENSG00000075461	ENSMUSG00000020723	CACNG4	82.1043	85.2471	78.7867	85.9167	71.0701	75.2669	70.8361	85.5821	90.7565	82.1674	87.1687	73.391	-0.248206
ENSG00000075539	ENSMUSG00000070733	FRYL	8.85776	8.3552	7.84674	7.13692	3.25861	2.75778	3.14821	3.55633	3.66764	3.99828	4.74075	4.05487	-0.225462
ENSG00000075568	ENSMUSG00000026116	TMEM131	29.1221	31.3019	32.5344	28.2121	14.8323	15.6087	14.9743	10.6652	11.1773	11.0036	11.9487	16.1384	0.433646
ENSG00000136770	ENSMUSG00000026740	DNAJC1	6.78232	7.59187	8.32608	9.20311	42.4484	47.1316	44.0826	5.3273	5.90314	5.90659	6.71234	45.5542	2.7627
ENSG00000075624	ENSMUSG00000029580	ACTB	868.275	858.525	776.285	937.815	1335.63	1461.07	1377.75	1956.39	1895.84	1740.47	1865.23	1392.48	-0.421698
ENSG00000075643	ENSMUSG00000039616	MOCOS	0.075525	0.054822	0.092486	0.070375	0.062564	0.036342	0.065595	0.049793	0.057246	0.082696	1.06324	1.05483	-0.0114585
ENSG00000075651	ENSMUSG00000027695	PLD1	0.138499	0.12397	0.176597	0.149172	0.05089	0.033127	0.147182	0.165042	0.106414	0.14082	1.13743	1.07707	-0.0786647
ENSG00000075673	ENSMUSG00000022229	ATP12A	0.003062	0.007689	0.016459	0.020108	0	0.005902	0	0	0.013497	0	1.0045	1.00197	-0.00364065
ENSG00000075702	ENSMUSG00000037020	WDR62	3.05981	2.39027	2.31092	2.25185	5.42952	4.84967	4.37815	6.54483	7.05234	7.4489	8.01536	5.88578	-0.445533
ENSG00000138131	ENSMUSG00000025185	LOXL4	0.128353	0.200874	0.289447	0.196416	7.56354	7.64355	8.1061	0.26547	0.213128	0.412549	1.29705	8.77106	2.75752
ENSG00000075790	ENSMUSG00000020650	BCAP29	9.1584	10.5556	10.7217	12.8006	2.97571	2.94894	2.88551	2.97182	2.53083	3.06914	3.85726	3.93672	0.0294165
ENSG00000075826	ENSMUSG00000051984	SEC31B	6.16531	5.34617	5.04126	5.45667	6.96583	6.75628	6.14439	7.28544	8.20456	7.73477	8.74159	7.62217	-0.197695
ENSG00000075856	ENSMUSG00000018974	SART3	9.42369	8.78491	9.25003	8.92045	10.7144	11.2993	11.1161	14.8963	14.1819	13.6938	15.2573	12.0432	-0.34128
ENSG00000075884	ENSMUSG00000049744	ARHGAP15	0.016614	0.003706	0.005793	0.012603	0.002769	0.006551	0.014781	0	0.010842	0.001748	1.0042	1.00803	0.00550198
ENSG00000075891	ENSMUSG00000004231	PAX2	0.007727	0	0	0	0.037776	0.105627	0.007333	0.00317	0	0	1.00106	1.05025	0.0692027
ENSG00000075914	ENSMUSG00000025785	EXOSC7	2.40837	2.37843	2.45376	2.72322	4.29624	3.47324	4.33358	5.94823	5.1022	5.50653	6.51899	5.03435	-0.372842
ENSG00000075945	ENSMUSG00000026585	KIFAP3	15.2158	16.3266	16.1566	18.6434	8.24429	7.93819	8.04246	6.69806	6.92147	7.17266	7.93073	9.07498	0.194441
ENSG00000075975	ENSMUSG00000000439	MKRN2	11.5247	11.8411	12.7763	11.7771	14.9448	15.6897	13.7668	12.3688	13.0217	12.5736	13.6547	15.8005	0.210566
ENSG00000076003	ENSMUSG00000026355	MCM6	19.2369	17.8376	16.8092	20.9761	16.4398	15.729	16.5715	31.3671	31.4297	31.3121	32.3696	17.2468	-0.908314
ENSG00000076043	ENSMUSG00000032026	REXO2	4.83615	5.2622	5.45656	5.61943	5.07302	4.97167	5.64611	5.09994	4.31441	4.73426	5.7162	6.23027	0.124237
ENSG00000076067	ENSMUSG00000040043	RBMS2	5.16268	5.26928	4.61822	4.19075	4.66421	4.23719	4.49064	2.15428	2.26973	2.36438	3.2628	5.46401	0.743851
ENSG00000076108	ENSMUSG00000040054	BAZ2A	11.6927	9.87155	9.64851	8.43112	10.5792	10.1283	10.4791	9.8313	10.187	10.5597	11.1927	11.3956	0.0259153
ENSG00000076201	ENSMUSG00000036057	PTPN23	16.4716	15.9471	15.3728	14.4255	22.3063	20.6128	21.0052	27.2273	29.5882	29.0907	29.6354	22.3081	-0.409754
ENSG00000076242	ENSMUSG00000032498	MLH1	10.7024	10.516	10.0353	11.4123	9.87668	11.3521	10.3198	12.5504	12.8253	12.7414	13.7057	11.5162	-0.25111
ENSG00000076248	ENSMUSG00000029591	UNG	12.7417	13.7858	13.088	14.6302	15.4351	17.5395	15.727	23.649	22.5826	21.7551	23.6622	17.2339	-0.457339
ENSG00000076258	ENSMUSG00000026692	FMO4	0.516984	0.620271	0.551816	0.606284	0.561561	0.130995	0.204611	0.200299	0.093393	0.064741	1.11948	1.29906	0.214638
ENSG00000184903	ENSMUSG00000056899	IMMP2L	0.596591	0.569173	0.561526	0.804602	8.94441	9.42401	12.0068	0.761796	0.729186	0.611732	1.7009	11.1251	2.70944
ENSG00000076344	ENSMUSG00000024186	RGS11	3.13841	2.90498	3.06291	2.91334	3.92223	3.78559	3.27649	1.25703	2.00138	2.29493	2.85111	4.66144	0.709251
ENSG00000076351	ENSMUSG00000020829	SLC46A1	6.11176	6.30574	5.79414	5.91118	7.99028	7.22867	6.39599	10.363	10.3952	10.6349	11.4644	8.20498	-0.482585
ENSG00000076356	ENSMUSG00000026640	PLXNA2	9.52545	8.54665	9.46313	7.18319	6.60019	6.26566	6.30763	13.0158	13.8366	13.3683	14.4069	7.39116	-0.962886
ENSG00000076382	ENSMUSG00000002055	SPAG5	16.6029	14.3578	14.2675	16.0857	14.5894	15.3087	15.4595	18.7725	18.4976	18.1356	19.4686	16.1192	-0.272368
ENSG00000076513	ENSMUSG00000041870	ANKRD13A	4.15571	4.42373	4.04466	4.40142	3.47089	3.52441	3.28505	3.06007	3.37416	3.57609	4.33677	4.42678	0.029637
ENSG00000076555	ENSMUSG00000042010	ACACB	1.15101	0.919482	1.19887	0.799048	0.953481	0.76935	0.757547	1.23182	1.26189	1.41155	2.30175	1.82679	-0.333421
ENSG00000115380	ENSMUSG00000020467	EFEMP1	0.060624	0.047329	0.036183	0.035364	7.62065	6.34348	5.73115	0.186532	0.166166	0.182381	1.17836	7.56509	2.68258
ENSG00000076641	ENSMUSG00000027508	PAG1	17.8593	15.4163	16.0323	12.7747	3.4981	4.49455	4.58394	7.98147	7.99413	8.21415	9.06325	5.1922	-0.803682
ENSG00000188153	ENSMUSG00000031274	COL4A5	11.6984	11.8703	9.90751	10.9683	39.3562	38.6002	39.997	5.21253	5.31011	5.49895	6.34053	40.3178	2.66874
ENSG00000160613	ENSMUSG00000035382	PCSK7	2.38383	2.53309	2.77785	2.34879	28.3148	26.8375	27.3321	3.55241	3.66326	3.64813	4.62127	28.4948	2.62434
ENSG00000076770	ENSMUSG00000036109	MBNL3	1.16846	0.99592	1.25821	1.04844	0.442374	0.557191	0.476583	0.758589	0.629784	0.59828	1.66222	1.49205	-0.155814
ENSG00000156804	ENSMUSG00000022358	FBXO32	8.35523	10.0999	7.15898	9.54957	21.0354	21.5434	22.4669	2.55111	2.58917	2.97289	3.70439	22.6819	2.61423
ENSG00000173598	ENSMUSG00000020029	NUDT4	21.2033	20.9625	23.0574	23.3576	76.7942	75.4489	84.7487	12.5851	11.5434	12.2291	13.1192	79.9973	2.60827
ENSG00000076924	ENSMUSG00000019470	XAB2	11.5045	11.7769	12.0819	10.8898	18.0435	18.9504	18.2914	25.0271	25.622	23.1818	25.6103	19.4284	-0.398556
ENSG00000076928	ENSMUSG00000040940	ARHGEF1	5.87356	5.3743	4.83582	4.61956	10.14	8.45748	8.6982	11.278	11.2475	13.659	13.0615	10.0985	-0.371173
ENSG00000076944	ENSMUSG00000004626	STXBP2	0.091004	0.157941	0.125479	0.144821	0.382782	0.157888	0.079881	0.324811	0.308952	0.374036	1.33593	1.20685	-0.146601
ENSG00000076984	ENSMUSG00000002948	MAP2K7	6.01947	5.80236	5.45268	5.67913	9.42457	8.79275	9.1257	10.1685	10.0922	9.61446	10.9584	10.1143	-0.115633
ENSG00000077009	ENSMUSG00000004939	NMRK2	0	0	0	0	0	0.359749	0.342086	0.034691	0	0.124964	1.05322	1.23395	0.228474
ENSG00000077044	ENSMUSG00000070738	DGKD	3.40215	3.36104	3.2892	3.00229	9.62019	8.51676	8.65993	8.28508	8.88536	9.38865	9.85303	9.93229	0.0115596
ENSG00000077063	ENSMUSG00000000416	CTTNBP2	1.8763	1.59145	1.5222	1.69618	0.58244	0.821298	0.644214	1.95542	2.19735	2.16126	3.10468	1.68265	-0.883707
ENSG00000166073	ENSMUSG00000040133	GPR176	2.32517	2.26117	2.69314	2.97077	15.0306	14.8118	15.093	1.61719	1.58099	1.72727	2.64182	15.9785	2.59652
ENSG00000077092	ENSMUSG00000017491	RARB	0.145883	0.092578	0.11909	0.10011	0.13338	0.032225	0.111443	0.113898	0.086741	0.073147	1.09126	1.09235	0.00143679
ENSG00000077097	ENSMUSG00000017485	TOP2B	81.9509	76.891	67.6381	79.9018	31.5991	30.0666	32.6203	42.3031	41.3066	43.0529	43.2208	32.4287	-0.414457
ENSG00000077147	ENSMUSG00000025016	TM9SF3	44.866	46.3159	48.2824	49.9977	21.1919	19.4553	23.6514	17.4264	15.7826	18.2283	18.1458	22.4329	0.305984
ENSG00000077150	ENSMUSG00000025225	NFKB2	4.32992	4.45911	8.9918	4.28392	11.3952	11.2298	10.6409	8.29876	8.33901	8.48911	9.37563	12.0887	0.366666
ENSG00000077157	ENSMUSG00000073557	PPP1R12B	3.84668	3.52497	3.37276	2.72708	2.58211	2.54482	2.59129	2.98848	3.18257	2.97948	4.05017	3.57274	-0.180952
ENSG00000077232	ENSMUSG00000027006	DNAJC10	19.9394	20.3879	23.9659	23.3544	11.6213	10.4982	11.4646	8.17005	7.28619	7.59683	8.68436	12.1947	0.489763
ENSG00000077235	ENSMUSG00000032777	GTF3C1	17.0195	14.9353	16.0998	13.2167	21.6625	20.5186	20.8216	23.4733	24.2444	23.6594	24.7924	22.0009	-0.172333
ENSG00000077238	ENSMUSG00000030748	IL4R	0.01584	0.018844	0.04538	0.028747	0.326373	0.174886	0.360606	0.048739	0.011027	0.023409	1.02772	1.28729	0.324881
ENSG00000077254	ENSMUSG00000025437	USP33	15.7615	15.9466	16.2585	17.5835	7.62462	7.07683	8.06814	7.8033	7.85903	7.97479	8.87904	8.58986	-0.0477683
ENSG00000077264	ENSMUSG00000031284	PAK3	5.53315	4.60295	4.32996	3.68064	3.43339	3.36314	3.87358	4.02371	4.74038	4.16509	5.30973	4.5567	-0.220647
ENSG00000077274	ENSMUSG00000067276	CAPN6	0.158274	0.201057	0.220176	0.248878	0	0	0.051321	0.066562	0.075295	0.057088	1.06631	1.01711	-0.0681622
ENSG00000115461	ENSMUSG00000026185	IGFBP5	8.32156	9.35711	8.05617	8.79639	25.9759	24.0397	25.0189	3.26568	3.11644	3.79996	4.39403	26.0115	2.56553
ENSG00000077312	ENSMUSG00000061479	SNRPA	21.1307	22.4078	21.906	25.1326	24.5507	24.5911	25.563	37.2518	37.1057	40.8884	39.4153	25.9016	-0.605715
ENSG00000077348	ENSMUSG00000061286	EXOSC5	2.53917	2.73974	2.75204	3.15672	4.80893	5.56511	5.83532	9.70934	9.19584	9.1901	10.3651	6.40312	-0.694886
ENSG00000077380	ENSMUSG00000027012	DYNC1I2	55.9862	58.2779	50.5484	68.8118	33.3301	37.1544	35.7148	35.4716	35.1693	33.5392	35.7267	36.3998	0.0269272
ENSG00000077420	ENSMUSG00000026786	APBB1IP	0.016157	0	0.007715	0	0	0	0	0	0.004218	0.005117	1.00311	1	-0.00448222
ENSG00000077458	ENSMUSG00000037808	FAM76B	7.81451	7.59878	6.99301	8.27834	2.02163	2.12821	2.88571	2.58392	2.28123	2.49104	3.45206	3.34519	-0.045372
ENSG00000077463	ENSMUSG00000034748	SIRT6	5.4193	5.74283	5.40356	5.81625	10.5981	9.17929	9.64465	11.3984	11.6334	13.4925	13.1748	10.8073	-0.285769
ENSG00000077498	ENSMUSG00000004651	TYR	0.005823	0	0	0	0.106628	0	0	0	0	0	1	1.03554	0.050387
ENSG00000077514	ENSMUSG00000030726	POLD3	5.0147	5.42627	5.17337	5.89828	3.06983	3.10425	3.10118	4.47653	4.85996	4.41447	5.58365	4.09175	-0.448489
ENSG00000077522	ENSMUSG00000052374	ACTN2	9.42115	9.42883	8.82324	7.78891	3.82739	3.55285	3.73709	7.16779	8.21897	7.83202	8.73959	4.70578	-0.893133
ENSG00000077549	ENSMUSG00000028745	CAPZB	39.1122	39.8435	37.2741	46.6322	41.0647	45.2674	43.0243	60.2941	59.795	58.7462	60.6118	44.1188	-0.458204
ENSG00000077585	ENSMUSG00000021306	GPR137B	58.2186	66.7997	57.4499	72.7446	33.7165	37.1983	34.0065	20.0256	18.9877	18.9007	20.3047	35.9738	0.825133
ENSG00000077616	ENSMUSG00000043943	NAALAD2	0.376618	0.319633	0.416504	0.30311	0.0532	0.034964	0.090676	0.103855	0.129089	0.07637	1.1031	1.05961	-0.0580318
ENSG00000077684	ENSMUSG00000025764	JADE1	6.23972	6.02611	5.25643	6.50688	8.46218	8.31296	8.57456	4.65526	4.64178	4.74446	5.6805	9.4499	0.73428
ENSG00000077713	ENSMUSG00000037636	SLC25A43	1.16586	1.2928	1.52407	1.4645	3.41247	3.19304	2.57181	2.92645	3.61612	2.56833	4.03697	4.05911	0.00789058
ENSG00000077721	ENSMUSG00000016308	UBE2A	16.112	16.3138	15.5342	19.1371	12.1726	11.4797	12.9998	11.5061	11.4943	12.2477	12.7494	13.2174	0.0520092
ENSG00000077782	ENSMUSG00000031565	FGFR1	23.6717	23.8976	28.8988	22.7041	34.927	32.2168	30.874	46.8923	46.6601	48.0823	48.2115	33.6726	-0.517803
ENSG00000077800	ENSMUSG00000040013	FKBP6	0.019634	0.011756	0.03125	0.015271	0.061081	0.015484	0.009316	0.04833	0.023918	0.004145	1.02546	1.02863	0.00444261
ENSG00000077935	ENSMUSG00000022432	SMC1B	0.00791	0.016823	0.026937	0.047052	0	0.031308	0	0.012368	0.005428	0.008161	1.00865	1.01044	0.00254896
ENSG00000128567	ENSMUSG00000025608	PODXL	7.3799	7.15977	15.3702	7.20395	60.1695	57.4805	59.5049	9.06715	9.03199	9.45858	10.1859	60.0516	2.55963
ENSG00000077943	ENSMUSG00000026768	ITGA8	0	0	0	0.003323	0.000487	0	0.033446	0.015774	0	0.008117	1.00796	1.01131	0.00478309
ENSG00000077984	ENSMUSG00000068129	CST7	0	0.029028	0	0.000354	0.01183	0	0	0.053202	0.063191	0	1.0388	1.00394	-0.0492368
ENSG00000078043	ENSMUSG00000025423	PIAS2	4.92373	4.74447	4.45592	4.61937	2.07935	2.33608	2.31889	2.14457	2.04284	2.07484	3.08742	3.24478	0.0717185
ENSG00000078053	ENSMUSG00000021314	AMPH	4.26576	4.16003	4.60423	4.49709	6.93819	7.68988	6.83594	6.94517	7.42605	7.35505	8.24209	8.15467	-0.0153837
ENSG00000078061	ENSMUSG00000001127	ARAF	10.7372	11.3174	11.776	11.9342	17.8645	17.5802	16.1677	18.9817	18.0162	18.3117	19.4365	18.2041	-0.0945067
ENSG00000078081	ENSMUSG00000041247	LAMP3	0.168559	0.315823	0.474849	0.495939	0.101129	0.132928	0.06598	0.098882	0.105602	0.010676	1.07172	1.10001	0.0375917
ENSG00000078098	ENSMUSG00000000392	FAP	0.015771	0.020487	0.036874	0.041077	0.014341	0.010865	0.03819	0.026773	0.052748	0.021815	1.03378	1.02113	-0.017758
ENSG00000078124	ENSMUSG00000030760	ACER3	11.7754	11.6808	12.9129	12.3883	5.8064	6.60776	6.45735	6.49408	5.98046	5.84632	7.10695	7.2905	0.0367877
ENSG00000078140	ENSMUSG00000029203	UBE2K	13.7743	13.6642	13.4626	15.7966	8.00861	7.51245	9.1371	12.1359	10.5954	12.4565	12.7293	9.21938	-0.465406
ENSG00000078142	ENSMUSG00000033628	PIK3C3	4.52333	4.19451	3.76746	3.92577	2.3326	2.03951	2.0316	2.61595	2.55003	2.59608	3.58735	3.13457	-0.194652
ENSG00000078177	ENSMUSG00000037795	N4BP2	6.28738	5.99477	5.01917	5.07152	1.35159	0.920873	1.63388	1.5753	1.38429	1.62791	2.52916	2.30211	-0.135702
ENSG00000078237	ENSMUSG00000038028	TIGAR	7.09511	6.4848	8.45942	8.3459	12.4555	13.5384	13.4631	11.4412	11.4977	12.2169	12.7186	14.1523	0.1541
ENSG00000078246	ENSMUSG00000001521	TULP3	10.8651	10.5418	9.419	10.408	9.95194	10.26	8.81713	9.2586	10.6043	10.2678	11.0435	10.6763	-0.048785
ENSG00000078269	ENSMUSG00000023805	SYNJ2	0.940511	1.09075	1.58215	1.11334	4.68751	3.86523	4.38137	4.5187	4.71207	4.75052	5.66043	5.31137	-0.0918273
ENSG00000078295	ENSMUSG00000021536	ADCY2	2.63047	2.74641	2.76719	2.74613	2.36229	2.46131	2.25903	1.53038	1.32481	1.56079	2.47199	3.36088	0.443164
ENSG00000078328	ENSMUSG00000008658	RBFOX1	0.136952	0.078335	0.104016	0.07005	0.146184	0.297027	0.089182	0.892836	1.03373	1.16464	2.0304	1.17746	-0.78608
ENSG00000078369	ENSMUSG00000029064	GNB1	61.0454	56.2857	58.8434	64.3293	100.972	111.344	109.027	114.755	118.99	104.169	113.638	108.114	-0.0718879
ENSG00000078401	ENSMUSG00000021367	EDN1	0.141647	0.07763	0.173729	0.086128	0.923858	0.817142	0.855223	0.048675	0	0	1.01622	1.86541	0.876271
ENSG00000078403	ENSMUSG00000026743	MLLT10	8.57072	7.88182	7.512	8.05607	4.50286	4.23684	5.01441	3.92126	4.43663	4.0365	5.13146	5.5847	0.122111
ENSG00000078487	ENSMUSG00000037108	ZCWPW1	0.876313	1.00388	1.17006	0.976234	1.55026	1.16912	1.0355	1.96657	1.83726	1.6511	2.81831	2.25163	-0.323862
ENSG00000078549	ENSMUSG00000029778	ADCYAP1R1	28.9467	32.8054	32.9315	28.4063	10.1721	8.90893	8.12758	15.5583	15.1895	16.1454	16.6311	10.0695	-0.723884
ENSG00000078579	ENSMUSG00000031603	FGF20	0	0	0	0	0	0	0	0	0	0	1	1	0
ENSG00000078589	ENSMUSG00000050921	P2RY10	0	0	0	0	0	0	0	0	0	0	1	1	0
ENSG00000078596	ENSMUSG00000031239	ITM2A	0	0.013991	0	0.024392	0.062719	0.037098	0.546839	0.019299	0.016373	0.099313	1.04499	1.21555	0.218116
ENSG00000078618	ENSMUSG00000053510	NRDC	16.48	16.7939	16.511	17.871	13.6698	14.8184	14.7423	18.0457	17.5431	18.8409	19.1432	15.4102	-0.312949
ENSG00000078674	ENSMUSG00000031592	PCM1	19.2189	17.2399	16.8145	17.0211	11.3103	11.1956	11.411	9.71456	9.48951	10.5704	10.9248	12.3057	0.17171
ENSG00000078687	ENSMUSG00000025571	TNRC6C	7.27644	6.32229	5.92461	5.13722	4.05363	4.19476	4.24319	6.67742	6.76192	6.46089	7.63341	5.16386	-0.563878
ENSG00000078699	ENSMUSG00000038533	CBFA2T2	6.45222	7.0894	6.88713	5.6363	7.65943	7.91326	6.76668	6.52461	6.61816	7.05	7.73092	8.44646	0.127706
ENSG00000078725	ENSMUSG00000028351	BRINP1	9.47767	7.73743	7.36942	7.94209	4.63218	5.56938	4.79798	3.39562	3.55977	3.31435	4.42325	5.99984	0.439819
ENSG00000078747	ENSMUSG00000027598	ITCH	11.5171	10.9546	10.7117	10.6071	6.43351	6.36055	6.75232	6.19169	6.33272	7.45727	7.66056	7.51546	-0.0275893
ENSG00000078795	ENSMUSG00000014503	PKD2L2	1.51715	1.28257	0.998419	1.43162	0.615504	0.558731	0.623118	0.482406	0.400869	0.554658	1.47931	1.59912	0.112351
ENSG00000078804	ENSMUSG00000038375	TP53INP2	10.3438	11.4399	10.7291	11.306	16.7027	17.3595	16.9677	10.18	10.4156	10.7704	11.4553	18.01	0.652778
ENSG00000078808	ENSMUSG00000029076	SDF4	26.7448	29.3191	36.0753	29.7903	60.5847	59.9665	57.5743	42.478	44.2598	42.3483	44.0287	60.3752	0.45551
ENSG00000078814	ENSMUSG00000074652	MYH7B	0.237416	0.178877	0.211126	0.137294	0.230171	0.161409	0.20496	0.240999	0.270095	0.355882	1.28899	1.19885	-0.104596
ENSG00000078898	ENSMUSG00000027481	BPIFB2	0	0.015118	0	0	0	0	0	0	0	0	1	1	0
ENSG00000078900	ENSMUSG00000029026	TP73	0.430272	0.364834	0.275909	0.29195	0.552599	0.662083	0.632271	1.34842	1.12948	0.987803	2.15524	1.61565	-0.41573
ENSG00000078902	ENSMUSG00000025139	TOLLIP	8.58315	9.72854	10.0938	9.73718	20.5286	20.3412	19.6655	20.379	20.1606	19.4254	20.9884	21.1784	0.0130075
ENSG00000078967	ENSMUSG00000061490	UBE2D4	4.2545	5.11374	4.6514	4.42523	4.44007	4.95277	4.81321	7.86189	7.78855	7.78647	8.8123	5.73535	-0.619637
ENSG00000079102	ENSMUSG00000006586	RUNX1T1	3.46482	2.88214	2.77248	2.73764	0.525322	0.549363	0.585135	1.46718	1.53518	1.54896	2.51711	1.55327	-0.696456
ENSG00000079112	ENSMUSG00000028217	CDH17	0.036177	0.01326	0.007355	0.024889	0.021983	0	0.013897	0	0.002152	0.008244	1.00347	1.01196	0.0121615
ENSG00000079134	ENSMUSG00000024287	THOC1	5.04325	5.315	4.77997	5.41295	1.93257	1.97415	2.06033	1.91193	1.94976	2.25269	3.03812	2.98902	-0.0235103
ENSG00000079150	ENSMUSG00000002732	FKBP7	3.05425	3.49375	3.33698	4.51973	0.918465	1.16108	0.63168	0.79336	0.905956	1.06379	1.92104	1.90374	-0.0130461
ENSG00000079156	ENSMUSG00000042359	OSBPL6	4.4288	4.5633	5.56941	4.38909	6.69967	7.66556	7.18723	4.88971	4.64334	4.795	5.77602	8.18416	0.502758
ENSG00000049089	ENSMUSG00000028626	COL9A2	2.53357	2.61684	2.94305	2.44168	17.7272	13.774	14.3251	1.68949	1.85592	1.77512	2.77351	16.2754	2.55291
ENSG00000079246	ENSMUSG00000026187	XRCC5	60.0284	56.5988	54.1624	62.4879	41.2867	45.1998	45.1124	52.2599	51.8753	53.9465	53.6939	44.8663	-0.259126
ENSG00000079257	ENSMUSG00000047557	LXN	0.69131	0.654961	0.741314	0.845697	0.428773	0.281353	0.415414	0.495712	0.45934	0.733831	1.56296	1.37518	-0.184661
ENSG00000079277	ENSMUSG00000028708	MKNK1	1.87324	2.27126	2.08131	1.93395	2.0784	1.79736	1.99476	1.53964	1.68514	1.58273	2.6025	2.95684	0.184157
ENSG00000068078	ENSMUSG00000054252	FGFR3	46.7843	52.3086	47.2078	48.7782	166.977	149.566	151.711	24.2942	25.2529	28.2709	26.9393	157.085	2.54376
ENSG00000079335	ENSMUSG00000033502	CDC14A	1.40446	1.38164	1.55299	1.47793	0.748452	0.6377	0.807446	0.660864	0.708198	0.843736	1.7376	1.7312	-0.00532361
ENSG00000079337	ENSMUSG00000022469	RAPGEF3	0.702509	0.587465	0.723538	0.493985	0.43113	0.314869	0.413507	0.808777	1.05097	1.01084	1.95686	1.3865	-0.497094
ENSG00000079387	ENSMUSG00000033075	SENP1	4.4406	4.51196	4.29542	4.64393	1.93285	1.70419	2.31599	3.2382	3.02843	2.72672	3.99779	2.98434	-0.421788
ENSG00000079393	ENSMUSG00000021768	DUSP13	0	0	0.013255	0	0.032873	0.032839	0	0	0.007247	0	1.00242	1.0219	0.0277788
ENSG00000079432	ENSMUSG00000005442	CIC	19.0081	17.2688	16.5294	13.7614	40.9275	36.9806	36.2929	33.9005	35.7	34.9117	35.8374	39.067	0.124485
ENSG00000079435	ENSMUSG00000003123	LIPE	1.66501	1.48298	1.19618	1.25849	3.04371	3.17202	2.66152	4.06755	4.08642	3.78118	4.97838	3.95909	-0.33051
ENSG00000172005	ENSMUSG00000027375	MAL	0.083586	0.072109	0.119175	0.11224	5.01378	5.0772	4.83306	0	0.034668	0.056259	1.03031	5.97468	2.53579
ENSG00000079462	ENSMUSG00000005447	PAFAH1B3	37.4597	38.3079	31.8742	44.7913	58.0177	65.6074	59.328	98.2905	96.342	83.5696	93.734	61.9844	-0.596668
ENSG00000079482	ENSMUSG00000031214	OPHN1	10.4536	9.85578	9.61291	9.26504	5.48997	5.11465	5.42872	4.4656	4.63365	4.94278	5.68068	6.34445	0.159432
ENSG00000079557	ENSMUSG00000029369	AFM	0.00649	0	0	0	0	0	0	0	0	0	1	1	0
ENSG00000079616	ENSMUSG00000030677	KIF22	17.3624	16.731	17.2643	18.5021	19.3001	18.6643	18.9462	31.8875	29.6305	31.6388	32.0522	19.9702	-0.682575
ENSG00000188549	ENSMUSG00000045838	C15orf52	1.00256	1.11125	1.05542	0.928908	13.9429	11.8896	11.144	1.40619	1.19741	1.36658	2.32339	13.3255	2.51988
ENSG00000079691	ENSMUSG00000021338	LRRC16A	9.28186	8.71808	9.56756	8.34592	6.31614	6.94984	6.1701	9.15144	9.55258	9.3268	10.3436	7.47869	-0.467882
ENSG00000079739	ENSMUSG00000025791	PGM1	6.56447	6.40094	6.62714	7.65307	9.44074	10.148	9.76826	14.6499	14.4714	13.847	15.3227	10.7857	-0.506558
ENSG00000079785	ENSMUSG00000037149	DDX1	27.6128	25.3487	26.2527	30.4139	18.4995	20.1343	18.143	25.2968	25.1422	26.72	26.7197	19.9256	-0.423278
ENSG00000079805	ENSMUSG00000033335	DNM2	6.59158	6.8047	7.239	6.70695	16.1897	14.9672	15.4352	18.4117	17.2104	18.1254	18.9158	16.5307	-0.194445
ENSG00000079819	ENSMUSG00000019978	EPB41L2	5.53626	5.15672	6.24278	5.07369	6.96317	7.58236	7.26162	6.5671	6.80471	7.05168	7.80783	8.26905	0.0828
ENSG00000079841	ENSMUSG00000041670	RIMS1	0.634194	0.514931	0.486793	0.514782	0.447212	0.415166	0.343431	0.77605	0.923254	1.08838	1.92923	1.40194	-0.460602
ENSG00000079931	ENSMUSG00000020000	MOXD1	178.159	209.698	247.997	249.682	16.9928	16.8339	16.5744	27.1858	25.8458	26.3404	27.4573	17.8004	-0.625285
ENSG00000079950	ENSMUSG00000019998	STX7	15.5887	14.7751	15.449	16.4299	7.16174	8.17806	8.47862	10.2885	10.1585	10.1971	11.2147	8.93947	-0.327127
ENSG00000079999	ENSMUSG00000003308	KEAP1	14.1778	13.9559	13.9499	14.88	28.2453	29.2335	30.2244	39.0235	36.8106	35.4543	38.0961	30.2344	-0.333453
ENSG00000080007	ENSMUSG00000070291	DDX43	0.022915	0.093819	0.054707	0.053468	0	0	0	0	0	0	1	1	0
ENSG00000080031	ENSMUSG00000035429	PTPRH	0.022211	0.013211	0.00707	0	0.101858	0.09745	0.205496	0.031892	0.030795	0.070335	1.04434	1.13493	0.120017
ENSG00000080166	ENSMUSG00000022129	DCT	6.42289	8.17742	4.56347	9.47996	0.42821	0.625242	0.525417	0.131997	0.241198	0.21454	1.19591	1.52629	0.351918
ENSG00000080189	ENSMUSG00000017664	SLC35C2	9.2558	10.3771	10.4139	9.62368	12.0387	11.0735	11.6444	12.7102	12.8425	13.0864	13.8797	12.5855	-0.141208
ENSG00000080200	ENSMUSG00000022723	CRYBG3	4.66947	4.33609	4.70759	4.5408	1.97558	1.36075	1.39672	2.14126	2.14194	2.03298	3.10539	2.57769	-0.268698
ENSG00000080293	ENSMUSG00000026387	SCTR	0.034583	0.023826	0.01059	0.007377	0.011673	0.078711	0.039464	0	0.011275	0.049167	1.02015	1.04328	0.0323526
ENSG00000080298	ENSMUSG00000040929	RFX3	10.5462	10.6708	9.96834	9.68	2.95801	2.28443	2.92954	3.66091	3.38333	3.35198	4.46541	3.72399	-0.261942
ENSG00000080345	ENSMUSG00000036202	RIF1	7.51793	6.42298	6.8528	5.98618	2.32771	2.35898	2.72716	2.9354	2.61063	3.07104	3.87236	3.47128	-0.157743
ENSG00000080371	ENSMUSG00000020132	RAB21	7.75636	7.76017	7.78933	9.33146	6.4444	6.15665	7.94989	6.44634	5.54731	6.40419	7.13261	7.85032	0.13832
ENSG00000158555	ENSMUSG00000035314	GDPD5	0.548681	0.477435	0.617119	0.496182	15.1586	16.1502	14.013	1.89858	1.79861	1.76491	2.8207	16.1073	2.51359
ENSG00000080503	ENSMUSG00000024921	SMARCA2	13.1412	12.1559	13.1464	13.6481	8.72694	9.99103	9.99142	12.172	12.5684	12.5607	13.4337	10.5698	-0.345909
ENSG00000080511	ENSMUSG00000053773	RDH8	0	0	0	0.012501	0	0	0	0	0	0	1	1	0
ENSG00000080546	ENSMUSG00000038332	SESN1	4.36223	4.59586	4.59564	5.02746	3.09685	3.27459	3.68964	4.64816	4.57786	4.76626	5.66409	4.35369	-0.379605
ENSG00000080561	ENSMUSG00000000266	MID2	0.077884	0.062663	0.119001	0.064615	0.055381	0.163788	0.118252	0.210883	0.184334	0.052616	1.14928	1.11247	-0.0469562
ENSG00000080603	ENSMUSG00000053877	SRCAP	13.3261	11.5909	11.2658	8.95435	17.0708	16.3962	15.1308	21.5591	22.4736	20.9012	22.6447	17.1992	-0.396825
ENSG00000080608	ENSMUSG00000041360	PUM3	3.75609	3.58483	4.19948	3.87814	10.3264	7.66295	10.2002	4.93108	6.57395	5.33102	6.61202	10.3965	0.652938
ENSG00000080618	ENSMUSG00000021999	CPB2	0.083341	0.064423	0.0526	0.053272	0.042466	0	0.006136	0.010758	0.032008	0.018353	1.02037	1.0162	-0.00591131
ENSG00000080644	ENSMUSG00000032303	CHRNA3	0.17544	0.154749	0.278424	0.130444	0.566	0.595931	0.504314	0.3599	0.319386	0.410655	1.36331	1.55541	0.190182
ENSG00000080709	ENSMUSG00000054477	KCNN2	4.42385	3.87023	3.5248	4.07328	0.220029	0.425355	0.292201	1.34337	1.66773	1.53405	2.51505	1.31253	-0.93824
ENSG00000080802	ENSMUSG00000038784	CNOT4	6.07092	5.47868	5.16675	5.2582	2.7738	3.1333	3.06504	3.15869	3.49321	3.37748	4.34313	3.99071	-0.122088
ENSG00000080815	ENSMUSG00000019969	PSEN1	16.2359	18.0214	18.2495	18.6307	6.57105	6.24731	6.77877	6.14128	6.56728	6.14421	7.28425	7.53238	0.0483246
ENSG00000080819	ENSMUSG00000022742	CPOX	10.9625	11.4493	11.5515	11.9711	7.50898	6.80718	8.37454	10.4287	9.77742	10.3526	11.1862	8.56357	-0.385441
ENSG00000080822	ENSMUSG00000022744	CLDND1	34.9649	39.3922	37.0175	45.5337	11.7703	12.8226	13.7358	11.2821	11.4037	11.6727	12.4528	13.7762	0.145708
ENSG00000080823	ENSMUSG00000056458	MOK	0.918403	1.059	0.910623	0.936704	1.06956	1.1939	0.678734	0.949311	1.04638	1.02091	2.00553	1.98073	-0.0179518
ENSG00000080839	ENSMUSG00000027641	RBL1	6.795	7.28898	7.0266	7.42267	3.42084	2.70867	3.74824	5.25317	4.8705	5.25812	6.12726	4.29259	-0.513395
ENSG00000080854	ENSMUSG00000034275	IGSF9B	1.98223	1.28126	1.01076	0.558054	2.2281	1.89935	1.70732	1.58885	1.77534	1.6496	2.67126	2.94492	0.140709
ENSG00000080986	ENSMUSG00000024056	NDC80	12.1191	11.7312	11.4201	13.6842	5.01268	5.43086	5.2362	5.30815	5.19862	5.3864	6.29773	6.22658	-0.0163909
ENSG00000081014	ENSMUSG00000001998	AP4E1	2.28989	1.95331	2.34011	2.39632	1.51203	1.65258	1.27525	1.60324	1.22715	1.65281	2.4944	2.47995	-0.00837889
ENSG00000081019	ENSMUSG00000044098	RSBN1	7.7702	7.88237	6.74578	7.71487	2.74452	2.68538	3.27505	3.27203	3.1972	3.57438	4.34787	3.90165	-0.156225
ENSG00000081026	ENSMUSG00000052539	MAGI3	7.99034	7.35512	6.23619	6.4663	4.44841	3.86028	3.48142	3.4189	3.14362	3.19706	4.2532	4.93004	0.213051
ENSG00000081051	ENSMUSG00000054932	AFP	0	0	0.009424	0.007675	0	0.023347	0	0	0	0.01875	1.00625	1.00778	0.00219529
ENSG00000081052	ENSMUSG00000067158	COL4A4	0.054142	0.031899	0.03259	0.030335	0.093168	0.187921	0.078649	0.009	0.019291	0.016468	1.01492	1.11991	0.142021
ENSG00000081059	ENSMUSG00000000782	TCF7	0.408242	0.281681	0.324255	0.320627	0.591849	0.618671	0.651727	0.804026	0.686699	0.872969	1.7879	1.62075	-0.141604
ENSG00000081087	ENSMUSG00000038280	OSTM1	12.6057	13.6125	15.8972	16.7638	11.0259	8.72559	12.1863	8.3061	7.03308	8.65119	8.99679	11.6459	0.372345
ENSG00000081138	ENSMUSG00000026312	CDH7	0.013657	0.051474	0.021495	0.004767	0	0	0	0.042463	0.007959	0.043703	1.03137	1	-0.044569
ENSG00000081148	ENSMUSG00000035270	IMPG2	0.588896	0.324067	0.531213	0.203757	0.046417	0.12098	0.17272	0.128137	0.119048	0.106638	1.11794	1.11337	-0.00590791
ENSG00000081181	ENSMUSG00000021125	ARG2	4.53333	4.17576	4.17713	5.48994	6.3161	6.82501	5.58602	6.13469	6.07366	5.50027	6.90287	7.24238	0.069266
ENSG00000081189	ENSMUSG00000005583	MEF2C	0.913909	1.03059	1.41891	1.21502	4.5763	4.6302	5.18547	2.29832	2.55864	2.6476	3.50152	5.79732	0.727405
ENSG00000081237	ENSMUSG00000026395	PTPRC	0	0.002441	0.000665	0.000503	0	0.002981	0	0	0.000987	0	1.00033	1.00099	0.000958278
ENSG00000081248	ENSMUSG00000026407	CACNA1S	0.005216	0.009307	0.039847	0.016227	0.024339	0	0	0	0	0	1	1.00811	0.0116574
ENSG00000081277	ENSMUSG00000026413	PKP1	0.010356	0.00924	0	0.008055	0.044874	0.01225	0.033167	0	0	0	1	1.0301	0.0427802
ENSG00000081307	ENSMUSG00000032557	UBA5	6.14856	6.19857	5.96843	6.00331	4.799	5.09261	5.0034	5.59218	5.51208	5.90981	6.67136	5.96501	-0.161457
ENSG00000081320	ENSMUSG00000026094	STK17B	2.87993	3.04976	2.66766	3.37297	0.725494	0.745413	0.882188	0.859095	0.807244	0.839722	1.83535	1.78436	-0.0406473
ENSG00000081377	ENSMUSG00000033102	CDC14B	3.30623	2.9981	2.76451	2.94135	2.87893	2.69879	3.36059	2.38977	2.21645	2.5858	3.39734	3.97944	0.22816
ENSG00000081479	ENSMUSG00000027070	LRP2	0.084439	0.058237	0.086886	0.058458	0.18836	0.145791	0.178777	0.293337	0.194054	0.222933	1.23677	1.17098	-0.0788712
ENSG00000081692	ENSMUSG00000036819	JMJD4	2.18185	2.3142	2.62282	2.37772	7.64239	6.97429	7.44263	10.2733	9.85821	9.55021	10.8939	8.3531	-0.383138
ENSG00000081721	ENSMUSG00000026659	DUSP12	7.54598	8.09489	6.88544	9.10126	7.36079	7.19777	7.98432	11.4607	11.6697	12.4626	12.8643	8.51429	-0.59542
ENSG00000081760	ENSMUSG00000029482	AACS	1.4085	1.47461	1.43214	1.36343	1.81189	1.90564	1.75962	2.6995	2.70732	2.56833	3.65838	2.82572	-0.372589
ENSG00000081791	ENSMUSG00000024442	KIAA0141	7.04295	7.38056	7.19206	7.55358	8.34249	8.18485	7.87479	10.6424	11.2363	11.2791	12.0526	9.13404	-0.400021
ENSG00000081800	ENSMUSG00000029700	SLC13A1	0.014569	0.019498	0.017391	0.025496	0.140825	0.043085	0.062213	0.013448	0.026622	0.019031	1.0197	1.08204	0.0856099
ENSG00000081803	ENSMUSG00000017978	CADPS2	0.281438	0.306251	0.443954	0.349172	0.397126	0.402491	0.298522	0.693476	0.617382	0.629668	1.64684	1.36605	-0.269696
ENSG00000081870	ENSMUSG00000063172	HSPB11	4.12465	4.75799	4.86783	5.50671	3.25705	3.44199	2.70564	4.22256	3.26406	4.00918	4.83194	4.1349	-0.22475
ENSG00000081913	ENSMUSG00000044340	PHLPP1	19.506	18.1155	18.796	17.2259	18.593	18.924	18.25	20.9775	21.5485	21.158	22.228	19.589	-0.182332
ENSG00000081923	ENSMUSG00000039529	ATP8B1	0.125768	0.080343	0.122563	0.057098	0.447149	0.294085	0.161996	0.136507	0.129114	0.054513	1.10671	1.30108	0.233427
ENSG00000081985	ENSMUSG00000018341	IL12RB2	0.03419	0.025287	0.027972	0.015978	0.049282	0.041626	0.019352	0.049092	0.048382	0.097126	1.06487	1.03675	-0.0386001
ENSG00000082014	ENSMUSG00000028949	SMARCD3	14.6959	16.0392	15.2403	16.4615	18.5508	18.1369	19.5824	22.7763	23.2828	25.2246	24.7612	19.7567	-0.325741
ENSG00000082068	ENSMUSG00000039828	WDR70	3.16082	3.16943	3.17787	3.50799	1.95538	2.06551	1.85459	2.60933	2.55281	2.59993	3.58736	2.95849	-0.278058
ENSG00000082074	ENSMUSG00000022148	FYB	0.005272	0.018816	0.005035	0	0	0	0	0	0	0	1	1	0
ENSG00000082126	ENSMUSG00000079550	MPP4	0.032898	0.069361	0.071762	0.055274	0.028108	0.043307	0.086425	0.015903	0.050595	0.008184	1.02489	1.05261	0.0385009
ENSG00000082146	ENSMUSG00000026027	STRADB	10.7063	11.2108	11.2002	12.0357	8.77365	9.47484	9.42446	9.48746	9.50534	10.4665	10.8198	10.2243	-0.0816638
ENSG00000082153	ENSMUSG00000051223	BZW1	54.0902	53.6742	51.3568	65.3549	33.5889	33.8864	39.5863	41.6	40.1551	43.8442	42.8664	36.6872	-0.224573
ENSG00000082175	ENSMUSG00000031870	PGR	0	0.000913	0.002007	0	0	0	0	0	0	0	1	1	0
ENSG00000082212	ENSMUSG00000024556	ME2	17.9436	18.9664	17.1122	20.4339	13.6497	11.6287	13.7371	17.0368	16.3831	19.9112	18.777	14.0052	-0.42301
ENSG00000082213	ENSMUSG00000022195	C5orf22	5.8153	5.72612	5.79502	6.47813	5.00814	4.09689	5.98873	3.19847	3.46159	3.40012	4.35339	6.03125	0.470317
ENSG00000082258	ENSMUSG00000026349	CCNT2	9.8491	10.3905	8.88276	9.58765	3.19976	3.28645	3.36827	3.62419	3.75727	4.16494	4.8488	4.28483	-0.178392
ENSG00000082269	ENSMUSG00000026153	FAM135A	5.25906	5.76102	5.74045	5.52927	4.42149	4.09513	4.46629	2.23411	2.21981	2.19172	3.21521	5.32764	0.728582
ENSG00000082293	ENSMUSG00000026141	COL19A1	0.007719	0.003444	0	0.011316	0.023833	0.003845	0.013734	0.012172	0.012342	0.017111	1.01388	1.0138	-0.000101033
ENSG00000082397	ENSMUSG00000024044	EPB41L3	29.3721	26.084	23.3303	28.3135	19.6236	19.4196	20.514	14.0117	14.0903	14.6949	15.2656	20.8524	0.449927
ENSG00000082438	ENSMUSG00000034903	COBLL1	0.651842	0.667814	0.724271	0.686738	1.0034	1.06833	0.987815	0.415008	0.449668	0.443286	1.43599	2.01985	0.492205
ENSG00000082458	ENSMUSG00000000881	DLG3	4.34083	4.21066	4.37523	4.10062	2.90637	2.31539	2.41074	3.40094	3.86406	3.55902	4.60801	3.54417	-0.378698
ENSG00000082497	ENSMUSG00000016262	SERTAD4	0.158834	0.165335	0.110285	0.224197	0.772143	0.56165	0.686329	0.212205	0.259523	0.258724	1.24348	1.67337	0.428372
ENSG00000082512	ENSMUSG00000026637	TRAF5	0.938367	1.35706	1.60383	1.00138	0.975053	1.0286	0.800651	0.892468	0.691074	0.915026	1.83286	1.93477	0.0780674
ENSG00000082515	ENSMUSG00000020514	MRPL22	2.21066	2.08491	2.31778	2.60543	1.41756	1.79854	1.9121	2.47782	2.25219	2.31104	3.34702	2.7094	-0.304901
ENSG00000082516	ENSMUSG00000037275	GEMIN5	5.11168	5.11311	4.53176	4.61925	5.27765	4.91887	5.18642	6.74414	6.88159	6.52897	7.71824	6.12765	-0.332938
ENSG00000082556	ENSMUSG00000025905	OPRK1	0	0.014035	0.00536	0.004365	0.007483	0	0	0.035153	0.044302	0.037325	1.03893	1.00249	-0.0514997
ENSG00000082641	ENSMUSG00000038615	NFE2L1	44.0401	43.0365	54.5198	42.765	76.7188	74.6134	70.3321	43.1286	41.3505	41.6441	43.0411	74.8881	0.799022
ENSG00000082684	ENSMUSG00000052133	SEMA5B	49.0742	48.6079	50.8177	42.8788	25.493	21.2854	20.5826	35.6816	36.6894	38.0353	37.8021	23.4536	-0.688655
ENSG00000082781	ENSMUSG00000022817	ITGB5	22.3569	21.2951	30.7486	21.9463	43.6115	44.5539	41.8188	62.7124	59.2018	58.0218	60.9787	44.3281	-0.460085
ENSG00000082805	ENSMUSG00000030172	ERC1	4.98609	4.38905	4.37048	3.92864	6.3055	6.45811	5.63253	7.01883	7.94606	7.50445	8.48978	7.13205	-0.251411
ENSG00000082898	ENSMUSG00000020290	XPO1	32.1001	31.543	31.418	31.9296	12.1443	11.8028	14.329	16.2202	16.1554	17.1379	17.5045	13.7587	-0.347383
ENSG00000082996	ENSMUSG00000036503	RNF13	27.37	30.0087	32.0827	37.4127	11.5212	11.7662	11.6098	6.30281	6.51586	5.91296	7.24387	12.6324	0.802295
ENSG00000083067	ENSMUSG00000052387	TRPM3	0.165465	0.137355	0.198823	0.12382	0.44166	0.37575	0.380948	0.299175	0.313021	0.331701	1.31463	1.39945	0.0902033
ENSG00000083093	ENSMUSG00000044702	PALB2	3.50959	3.80339	3.63758	3.51667	2.9802	2.78215	2.71948	3.20592	3.19374	3.05946	4.15304	3.82728	-0.117849
ENSG00000083097	ENSMUSG00000034973	DOPEY1	6.37884	6.16294	5.91134	5.66901	2.46251	2.39223	2.75923	2.82725	3.38299	3.09797	4.10274	3.53799	-0.213655
ENSG00000083168	ENSMUSG00000031540	KAT6A	13.271	12.0008	11.9962	10.918	8.69869	8.3139	7.91165	10.779	11.1837	10.244	11.7356	9.30808	-0.33433
ENSG00000083223	ENSMUSG00000035248	ZCCHC6	4.55008	3.83128	4.11655	3.58874	1.83811	1.69461	1.92661	2.1314	2.02765	1.84683	3.00196	2.81978	-0.0903212
ENSG00000083290	ENSMUSG00000004798	ULK2	4.55251	4.30423	4.31127	4.33844	3.71908	4.04225	3.72482	4.75118	4.63201	4.55101	5.64473	4.82872	-0.225265
ENSG00000083307	ENSMUSG00000022286	GRHL2	0.037848	0.041245	0.066751	0.023707	0	0.002093	0	0.016329	0.049873	0.061033	1.04241	1.0007	-0.058919
ENSG00000083312	ENSMUSG00000009470	TNPO1	17.7774	18.583	17.2782	18.4413	9.8357	10.4089	11.5883	11.447	11.2503	11.183	12.2934	11.611	-0.0824003
ENSG00000083444	ENSMUSG00000019055	PLOD1	9.84289	10.9562	13.617	10.6083	31.8197	33.2064	32.0441	20.5843	19.4468	17.9956	20.3422	33.3567	0.7135
ENSG00000083457	ENSMUSG00000005947	ITGAE	1.1563	1.35851	1.03143	1.53993	1.49212	1.70313	1.70692	1.798	1.38605	1.57734	2.58713	2.63406	0.0259327
ENSG00000083520	ENSMUSG00000033166	DIS3	8.27393	7.96205	7.50195	8.22389	4.84833	4.60658	5.96052	5.68721	5.75485	5.49037	6.64414	6.13848	-0.114202
ENSG00000083535	ENSMUSG00000022064	PIBF1	5.54643	4.93497	5.50949	5.91373	1.26017	1.64458	1.07302	1.68031	1.64562	1.82507	2.717	2.32593	-0.224211
ENSG00000083544	ENSMUSG00000022019	TDRD3	4.53226	4.41176	3.8862	4.96438	2.62237	2.59407	2.34844	3.15581	3.0928	2.94414	4.06425	3.52163	-0.206749
ENSG00000083635	ENSMUSG00000022009	NUFIP1	3.61173	3.60728	3.73801	4.19557	2.33954	2.16974	2.11744	3.25135	3.41094	3.05246	4.23825	3.20891	-0.401386
ENSG00000083642	ENSMUSG00000034021	PDS5B	6.84094	6.79716	6.20571	6.68708	2.72394	2.84809	3.0226	4.59092	4.63737	4.57418	5.60082	3.86488	-0.535217
ENSG00000083720	ENSMUSG00000022186	OXCT1	12.3357	12.7486	12.4353	14.2707	8.05656	8.3247	10.3901	12.0106	12.1684	12.0899	13.0896	9.92379	-0.39946
ENSG00000083750	ENSMUSG00000041658	RRAGB	7.08007	7.48344	7.27759	8.19573	6.34134	6.04722	6.00544	4.68689	4.70443	5.7292	6.04017	7.13133	0.239582
ENSG00000083782	ENSMUSG00000019936	EPYC	0	0.015897	0	0	0	0	0	0	0	0	1	1	0
ENSG00000083799	ENSMUSG00000036712	CYLD	1.82435	1.93027	2.49846	1.87701	1.56439	1.52839	1.54349	1.03462	0.937985	1.22895	2.06718	2.54542	0.300238
ENSG00000083807	ENSMUSG00000030382	SLC27A5	1.26355	1.30889	1.16154	1.28937	2.51944	2.11671	2.61375	3.08232	3.19564	3.0587	4.11222	3.41663	-0.267343
ENSG00000083838	ENSMUSG00000033961	ZNF446	4.40027	4.02891	3.75559	3.38103	6.28639	5.10376	6.50861	7.8707	7.68684	7.66956	8.74237	6.96626	-0.327641
ENSG00000083842	ENSMUSG00000060397	NA	8.52619	7.95982	7.70978	6.10046	5.15539	4.63017	5.00286	7.6349	7.95178	7.77816	8.78828	5.92947	-0.567677
ENSG00000083845	ENSMUSG00000012848	RPS5	47.2501	46.7133	39.5306	58.7754	79.8887	91.761	81.562	131.462	135.143	111.033	126.879	85.4039	-0.571084
ENSG00000159167	ENSMUSG00000014813	STC1	5.05387	3.85412	3.42333	4.95744	11.5218	12.2739	12.201	1.33914	1.33144	1.20487	2.29181	12.9989	2.50383
ENSG00000083896	ENSMUSG00000035851	YTHDC1	14.9232	13.828	13.7623	14.7653	7.77529	8.93069	7.89863	9.25623	9.43813	9.01355	10.236	9.20154	-0.153701
ENSG00000083937	ENSMUSG00000004843	CHMP2B	10.1199	11.5928	11.6299	14.4838	4.24813	4.64015	4.55468	5.91659	5.63283	6.21924	6.92289	5.48098	-0.336939
ENSG00000084070	ENSMUSG00000032870	SMAP2	6.43642	6.28572	6.04881	6.913	11.6931	11.2628	10.3699	13.3673	13.7986	13.5762	14.5807	12.1086	-0.268029
ENSG00000084072	ENSMUSG00000028651	PPIE	3.40657	3.29674	3.54946	3.66133	2.65056	3.56079	3.63861	4.52764	4.90673	4.16624	5.53354	4.28332	-0.369472
ENSG00000084073	ENSMUSG00000043207	ZMPSTE24	22.7597	23.4052	24.5695	27.4335	11.1312	10.9919	13.734	7.81785	6.27492	7.0632	8.05199	12.9524	0.685799
ENSG00000084090	ENSMUSG00000027367	STARD7	41.4219	41.2697	41.1983	45.8611	46.2417	50.8814	53.1188	59.71	55.5017	60.4525	59.5547	51.0806	-0.22144
ENSG00000084092	ENSMUSG00000036285	NOA1	5.94006	6.06428	5.82396	6.49386	9.07077	9.46363	8.22832	9.48385	10.4795	9.82881	10.9307	9.9209	-0.139844
ENSG00000084093	ENSMUSG00000029249	REST	7.43805	7.73182	7.68579	7.27123	6.32772	5.96907	6.6489	3.75516	4.13804	4.05417	4.98246	7.31523	0.554045
ENSG00000084110	ENSMUSG00000020017	HAL	0.011348	0.025129	0.023441	0.009722	0	0	0	0	0	0.011875	1.00396	1	-0.0056994
ENSG00000084112	ENSMUSG00000042121	SSH1	3.98151	3.45271	3.49615	3.12626	5.40201	5.28517	5.60493	4.62392	5.10232	5.06399	5.93008	6.43071	0.116927
ENSG00000084234	ENSMUSG00000031996	APLP2	92.7512	100.723	108.164	107.999	119.071	124.768	118.232	92.264	87.5622	90.6639	91.1634	121.69	0.416688
ENSG00000084444	ENSMUSG00000030207	FAM234B	5.2735	5.34091	6.11818	5.43601	5.14994	4.80634	4.09227	4.294	4.25134	4.01407	5.18647	5.68285	0.131863
ENSG00000084623	ENSMUSG00000028798	EIF3I	39.4998	34.3788	32.9075	42.097	57.2512	64.5264	61.8749	84.6425	84.5512	83.0878	85.0938	62.2175	-0.451734
ENSG00000084628	ENSMUSG00000078532	NKAIN1	1.74113	2.09625	2.15157	2.25367	8.08959	8.99174	10.7034	7.47942	7.29687	7.7096	8.49529	10.2616	0.272516
ENSG00000084636	ENSMUSG00000040690	COL16A1	6.116	5.84443	6.49784	5.11693	10.3623	8.72958	9.13939	5.12101	6.05459	7.39283	7.18948	10.4104	0.53407
ENSG00000084652	ENSMUSG00000053841	TXLNA	14.4253	13.866	14.9569	14.5045	19.6234	18.7265	16.9831	17.2892	18.3958	19.8883	19.5244	19.4443	-0.0059332
ENSG00000084674	ENSMUSG00000020609	APOB	0	0	0	0	0	0	0	0	0	0	1	1	0
ENSG00000084676	ENSMUSG00000020647	NCOA1	13.8032	13.3556	13.6152	12.1654	6.67626	7.98013	7.19831	8.69473	9.25523	8.97119	9.97372	8.2849	-0.267647
ENSG00000084693	ENSMUSG00000029165	AGBL5	8.57367	9.13709	8.86393	9.50253	10.6028	10.1335	9.13545	12.7559	12.9768	12.2546	13.6624	10.9573	-0.318326
ENSG00000084710	ENSMUSG00000020658	EFR3B	4.2173	3.31949	3.66346	2.39208	10.2029	8.71267	9.39698	7.03257	7.21769	8.0896	8.44662	10.4375	0.305333
ENSG00000084731	ENSMUSG00000020668	KIF3C	18.301	17.7448	16.0689	17.1934	19.4482	20.946	19.8511	26.304	27.2153	26.138	27.5524	21.0818	-0.386181
ENSG00000084734	ENSMUSG00000059434	GCKR	0.111269	0.07176	0.026243	0.031826	0.076862	0.172953	0.034526	0.077486	0.140563	0.064684	1.09424	1.09478	0.000706511
ENSG00000084754	ENSMUSG00000025745	HADHA	36.455	36.0663	33.7656	39.4292	38.731	42.1625	40.7566	54.722	49.2402	51.0719	52.678	41.5501	-0.342351
ENSG00000084764	ENSMUSG00000029166	MAPRE3	6.42647	6.20283	6.4207	6.63981	8.81136	8.30938	9.12377	9.59245	9.54163	8.98029	10.3715	9.74817	-0.089415
ENSG00000084774	ENSMUSG00000013629	CAD	6.74116	6.21278	7.48621	4.87725	15.3785	14.4699	14.3345	21.9654	23.2898	21.2671	23.1741	15.7276	-0.559211
ENSG00000166482	ENSMUSG00000042436	MFAP4	1.29625	1.81755	2.18129	1.72549	10.2764	15.7254	11.1022	1.61425	1.46341	1.05356	2.37707	13.368	2.49153
ENSG00000085224	ENSMUSG00000031229	ATRX	24.2282	21.3161	19.1663	20.1404	13.862	14.7699	16.8948	10.9584	10.604	11.0128	11.8584	16.1756	0.447908
ENSG00000085231	ENSMUSG00000052293	AK6	10.3818	10.5024	11.198	13.0473	7.32297	8.47583	6.9511	7.29017	7.57724	7.43725	8.43489	8.5833	0.0251631
ENSG00000085274	ENSMUSG00000037730	MYNN	3.9072	4.27651	4.05001	4.54842	1.16064	1.9973	1.92122	2.27329	2.22488	2.17105	3.22307	2.69305	-0.259193
ENSG00000085276	ENSMUSG00000027684	MECOM	0	0	0.003374	0	0	0.005572	0	0	0.003689	0.002238	1.00198	1.00186	-0.000170392
ENSG00000085377	ENSMUSG00000019849	PREP	6.07433	5.97984	5.849	5.9804	8.98692	9.76774	10.5748	7.84775	8.74118	7.55187	9.04693	10.7765	0.252385
ENSG00000085382	ENSMUSG00000038822	HACE1	4.51171	4.27452	4.0244	3.94687	1.69802	1.56714	1.71979	2.28563	2.06522	2.31318	3.22134	2.66165	-0.275341
ENSG00000085415	ENSMUSG00000079614	SEH1L	2.4011	2.62369	2.55655	2.89143	2.30439	2.16642	2.07584	3.40093	3.04388	2.86553	4.10345	3.18222	-0.366806
ENSG00000085433	ENSMUSG00000040389	WDR47	22.9655	23.198	21.2536	23.4408	12.8589	12.5754	11.1942	14.2271	13.8153	15.0948	15.379	13.2095	-0.219393
ENSG00000085449	ENSMUSG00000073643	WDFY1	10.134	10.5428	12.9972	12.0242	9.75026	10.0877	10.1085	10.9384	10.796	11.5517	12.0953	10.9821	-0.139291
ENSG00000085465	ENSMUSG00000074340	OVGP1	0.47543	0.447061	0.544695	0.359202	0.226395	0.292618	0.31604	0.249907	0.290507	0.429289	1.32323	1.27835	-0.0497846
ENSG00000085491	ENSMUSG00000040322	SLC25A24	2.3541	2.57066	2.3942	2.82237	1.68785	1.65728	1.98037	2.10533	1.90316	1.84636	2.95162	2.77516	-0.0889322
ENSG00000085511	ENSMUSG00000014426	MAP3K4	4.49204	4.12571	4.07045	3.57562	2.55928	2.66657	3.42459	5.67321	5.37448	5.45887	6.50219	3.88348	-0.743575
ENSG00000085552	ENSMUSG00000037995	IGSF9	1.08842	1.38002	1.48827	1.07201	1.40833	1.51307	1.20917	1.18586	1.14904	1.4594	2.26477	2.37686	0.0696945
ENSG00000085644	ENSMUSG00000071256	ZNF213	3.62224	3.59927	3.34577	3.30715	6.37898	6.3826	5.74729	8.16285	8.58663	8.06323	9.2709	7.16962	-0.370813
ENSG00000085662	ENSMUSG00000001642	AKR1B1	11.1542	12.0899	11.536	14.2855	19.0858	20.1971	20.0408	25.3692	24.8266	25.0571	26.0843	20.7746	-0.328362
ENSG00000085719	ENSMUSG00000028228	CPNE3	16.8389	17.3083	16.6264	18.3519	8.32183	7.9166	9.09874	10.3036	10.6975	10.6864	11.5625	9.44572	-0.291719
ENSG00000085721	ENSMUSG00000022682	RRN3	12.0673	11.5761	11.0493	11.395	5.52038	6.66304	6.89237	7.75425	7.80062	8.1267	8.89386	7.3586	-0.273379
ENSG00000085733	ENSMUSG00000031078	CTTN	15.5806	14.3505	14.66	14.0725	35.3962	36.2165	37.0113	26.545	26.0484	26.5145	27.3693	37.208	0.443054
ENSG00000085741	ENSMUSG00000015957	WNT11	0.065123	0.095609	0.291763	0.063811	0.101748	0.105633	0.104865	0.253685	0.262245	0.084836	1.20026	1.10408	-0.120494
ENSG00000085760	ENSMUSG00000020459	MTIF2	4.80916	4.80852	4.77294	5.06062	5.40868	4.65998	6.15438	4.76268	5.15637	5.2533	6.05745	6.40768	0.0810914
ENSG00000085831	ENSMUSG00000028555	TTC39A	0.064095	0.055695	0.093193	0.031289	0.156145	0.165112	0.184799	0.08086	0.077026	0.029859	1.06258	1.16869	0.137313
ENSG00000085832	ENSMUSG00000028552	EPS15	9.10032	9.34715	9.88565	10.3317	6.90756	6.65636	7.99212	6.00657	6.2228	6.83696	7.35544	8.18534	0.154231
ENSG00000085840	ENSMUSG00000028587	ORC1	4.3622	4.39896	4.16096	4.6338	3.99788	3.88866	4.45582	8.10217	7.67614	7.76179	8.8467	5.11412	-0.790654
ENSG00000085871	ENSMUSG00000074604	MGST2	1.13267	1.12403	1.847	1.40139	0.366319	0.335134	0.619571	0.436075	0.35941	0.265613	1.3537	1.44034	0.0895034
ENSG00000085872	ENSMUSG00000052488	CHERP	15.2945	14.9658	14.0549	13.8987	21.1282	20.3536	19.8043	29.2198	28.1772	28.8407	29.7459	21.4287	-0.473146
ENSG00000085978	ENSMUSG00000026289	ATG16L1	3.30832	3.06221	3.3015	3.24578	4.50952	4.43174	4.64257	4.2744	4.5886	4.81508	5.55936	5.52795	-0.00817459
ENSG00000085982	ENSMUSG00000005501	USP40	3.41039	3.28187	3.53113	2.88257	3.10913	2.81154	3.26594	4.02064	3.94808	3.78035	4.91636	4.06221	-0.275327
ENSG00000085998	ENSMUSG00000028700	POMGNT1	13.9581	14.2002	14.9035	15.2521	20.1566	19.0463	18.1744	17.5455	19.4602	19.2083	19.738	20.1258	0.0280702
ENSG00000085999	ENSMUSG00000028702	RAD54L	5.91365	5.36534	4.94297	5.43599	6.21291	7.43889	6.71248	10.2777	11.0484	10.7518	11.6926	7.78809	-0.586257
ENSG00000086015	ENSMUSG00000003810	MAST2	6.36026	5.69963	5.80263	5.21567	15.6759	16.1671	14.9479	18.541	19.6265	18.6737	19.9471	16.597	-0.265259
ENSG00000064309	ENSMUSG00000038119	CDON	13.5739	15.6967	14.9956	14.5301	18.9876	19.3556	20.5198	2.56806	2.62165	2.87829	3.68933	20.621	2.48268
ENSG00000086065	ENSMUSG00000028419	CHMP5	21.4848	22.2729	23.749	28.1342	12.0021	12.989	12.5623	13.0579	12.3144	12.3948	13.589	13.5178	-0.00758382
ENSG00000086159	ENSMUSG00000043144	AQP6	0.218516	0.193235	0.272452	0.314564	0.146301	0.135986	0.230827	0.192933	0.15481	0.154203	1.16732	1.17104	0.00459355
ENSG00000086200	ENSMUSG00000042590	IPO11	4.35495	4.62635	4.76358	5.31172	3.01425	2.85517	3.48491	3.77958	4.11596	4.06898	4.98817	4.11811	-0.276528
ENSG00000086232	ENSMUSG00000029613	EIF2AK1	20.1984	19.6848	20.3246	22.2044	21.4496	22.7662	19.6912	22.9953	22.6697	21.9748	23.5466	22.3023	-0.0783227
ENSG00000086288	ENSMUSG00000041138	NME8	0	0.011765	0	0	0	0.010399	0	0	0	0	1	1.00347	0.00499221
ENSG00000086289	ENSMUSG00000002808	EPDR1	7.72685	8.31443	9.31228	9.19079	14.3495	16.7114	17.3174	11.2536	11.4681	11.3551	12.359	17.1261	0.470641
ENSG00000086300	ENSMUSG00000038301	SNX10	0.260817	0.253953	0.501858	0.355156	0.127979	0.222414	0.060217	0.283512	0.208595	0.394774	1.29563	1.13687	-0.188583
ENSG00000086475	ENSMUSG00000026662	SEPHS1	25.9316	25.1115	22.1656	28.3153	17.5033	18.0716	18.24	26.4786	26.4977	26.3876	27.4547	18.9383	-0.535744
ENSG00000086504	ENSMUSG00000024181	MRPL28	11.1687	10.9895	12.3225	13.3771	26.525	26.2693	27.8619	35.5001	30.8779	32.3992	33.9257	27.8854	-0.282871
ENSG00000086544	ENSMUSG00000003752	ITPKC	3.55138	3.63386	5.22548	3.61262	5.71349	5.72665	6.04663	5.98106	6.47651	5.03874	6.8321	6.82892	-0.000672221
ENSG00000086570	ENSMUSG00000055333	FAT2	0.107838	0.113072	0.117241	0.096032	0.097784	0.061787	0.050945	0.052809	0.079158	0.084385	1.07212	1.07017	-0.00262012
ENSG00000086598	ENSMUSG00000029390	TMED2	37.6144	44.0616	49.4441	54.222	28.5475	29.5971	32.0813	26.2413	23.8844	25.742	26.2892	31.0753	0.241297
ENSG00000086619	ENSMUSG00000057069	ERO1B	2.53806	2.65582	2.44167	2.92984	1.06702	0.974049	1.00386	0.876042	0.636281	1.07048	1.86093	2.01497	0.114734
ENSG00000086666	ENSMUSG00000030629	ZFAND6	12.6681	14.4236	14.4795	16.2846	7.69471	7.30734	8.48105	10.0867	9.15557	8.67143	10.3046	8.8277	-0.223174
ENSG00000086717	ENSMUSG00000062168	PPEF1	0.027418	0.104074	0.087276	0.015807	0	0.014415	0	0.02812	0.057257	0.020259	1.03521	1.0048	-0.0430107
ENSG00000086730	ENSMUSG00000040751	LAT2	0.197377	0.159396	0.197027	0.13529	0.614472	0.128432	0.220409	0.350996	0.259722	0.294007	1.30157	1.3211	0.021486
ENSG00000086758	ENSMUSG00000025261	HUWE1	20.3911	17.6984	17.878	13.9453	18.7723	19.2883	18.2726	20.6899	22.3658	19.141	21.7322	19.7777	-0.13596
ENSG00000086827	ENSMUSG00000032264	ZW10	6.50639	5.85488	6.03381	6.49864	3.62927	4.36321	4.15013	5.39692	5.56131	5.27272	6.41032	5.04754	-0.344816
ENSG00000086848	ENSMUSG00000032059	ALG9	7.02569	6.91672	7.14963	7.63283	3.26927	3.43812	3.48599	3.67335	3.51157	3.68038	4.62176	4.3978	-0.0716629
ENSG00000086967	ENSMUSG00000038670	MYBPC2	0.02602	0.017819	0.021579	0.032931	0	0.01026	0	0.048318	0.009056	0	1.01912	1.00342	-0.0224049
ENSG00000086991	ENSMUSG00000030562	NOX4	0.255695	0.325198	0.434862	0.34791	0.765301	0.789647	0.46692	0.134506	0.169844	0.173084	1.15914	1.67396	0.530201
ENSG00000087008	ENSMUSG00000029098	ACOX3	2.75363	2.79221	2.87436	2.74764	8.19458	9.35826	9.42112	6.43324	7.27506	6.43303	7.71378	9.99132	0.373237
ENSG00000087053	ENSMUSG00000031918	MTMR2	8.15058	8.03286	7.55113	8.41154	4.63955	5.53422	4.83047	8.48645	8.45322	9.25817	9.73261	6.00142	-0.697524
ENSG00000087074	ENSMUSG00000040435	PPP1R15A	8.52101	8.11407	8.21302	9.25813	16.6754	16.8091	16.7323	10.6542	10.7809	9.73987	11.3917	17.7389	0.638941
ENSG00000140450	ENSMUSG00000042659	ARRDC4	11.8526	12.5596	10.8521	13.255	29.3642	30.3495	34.3557	4.33849	4.90995	5.16714	5.80519	32.3565	2.47864
ENSG00000087077	ENSMUSG00000023348	TRIP6	12.3082	13.2135	15.904	13.8528	55.7523	54.9968	54.4878	32.0343	28.4624	29.7568	31.0845	56.079	0.851263
ENSG00000087085	ENSMUSG00000023328	ACHE	0.512796	0.834435	1.11433	0.843829	1.58145	1.32311	1.36432	0.841233	0.662612	0.838424	1.78076	2.42296	0.444279
ENSG00000087087	ENSMUSG00000037364	SRRT	29.9337	26.5438	23.7853	28.6572	39.0479	37.991	37.0717	40.5141	43.5893	41.9626	43.022	39.0369	-0.140236
ENSG00000087088	ENSMUSG00000003873	BAX	13.7679	13.8593	14.613	14.3392	45.5323	47.9144	46.1962	40.3145	36.9567	39.3408	39.8707	47.5476	0.254046
ENSG00000087095	ENSMUSG00000017376	NLK	5.26226	5.06283	5.3301	5.39105	2.87472	2.7876	3.03488	3.47586	3.60093	3.76215	4.61298	3.89907	-0.242571
ENSG00000087111	ENSMUSG00000041958	PIGS	10.0854	10.9843	11.4104	11.4472	12.9689	12.3366	11.82	10.3154	9.94168	9.78168	11.0129	13.3752	0.28036
ENSG00000087116	ENSMUSG00000036545	ADAMTS2	0.150562	0.10651	0.162942	0.095353	0.489514	0.52973	0.450662	0.384651	0.361127	0.259559	1.33511	1.48997	0.158321
ENSG00000087128	ENSMUSG00000054537	TMPRSS11E	0	0	0	0	0	0	0	0	0	0.019054	1.00635	1	-0.00913406
ENSG00000087157	ENSMUSG00000017715	PGS1	4.76812	4.55922	5.02138	3.67729	6.64135	6.26706	5.42414	7.71923	7.12615	8.47691	8.7741	7.11085	-0.303229
ENSG00000087191	ENSMUSG00000020708	PSMC5	13.4223	12.3294	13.2859	15.365	26.2893	25.312	25.6426	29.5981	27.6483	27.1468	29.1311	26.7479	-0.12313
ENSG00000087206	ENSMUSG00000025878	UIMC1	3.97111	3.74618	3.82454	4.75524	3.57101	3.82253	4.11108	4.62162	4.90959	5.21986	5.91702	4.83487	-0.291394
ENSG00000087245	ENSMUSG00000031740	MMP2	44.2397	39.0783	61.436	42.1255	157.796	168.155	170.515	88.0341	84.1522	83.2529	86.1464	166.489	0.950561
ENSG00000122786	ENSMUSG00000029761	CALD1	20.7257	20.573	20.9321	22.8639	83.9651	82.8138	90.1446	14.7215	14.2826	14.7205	15.5749	86.6412	2.47583
ENSG00000087253	ENSMUSG00000033192	LPCAT2	1.32421	1.15847	1.81322	1.24923	3.71165	3.7663	4.06085	1.77648	1.4198	1.75461	2.6503	4.84627	0.87072
ENSG00000087263	ENSMUSG00000033009	OGFOD1	4.21629	4.24385	4.58764	4.66804	5.27978	6.16844	6.84338	6.16751	5.97017	6.07539	7.07103	7.0972	0.00533033
ENSG00000087266	ENSMUSG00000054520	SH3BP2	3.84547	3.71585	3.62477	3.23781	4.39576	4.12864	3.34358	3.37916	3.57135	4.24247	4.73099	4.95599	0.0670314
ENSG00000087269	ENSMUSG00000036693	NOP14	6.3716	5.49894	6.15666	5.94646	9.9427	12.3164	12.3317	14.4421	13.6291	13.8769	14.9827	12.5302	-0.257883
ENSG00000087274	ENSMUSG00000029106	ADD1	28.2883	28.4042	26.6324	28.0857	35.9008	36.9614	36.6975	35.4284	35.3001	34.53	36.0862	37.5199	0.0562097
ENSG00000087299	ENSMUSG00000020988	L2HGDH	1.38994	1.2955	1.31472	1.21579	1.7751	1.85145	2.65526	2.0112	2.10203	2.50436	3.20586	3.09394	-0.0512685
ENSG00000087301	ENSMUSG00000021830	TXNDC16	17.3784	18.3577	15.8288	20.445	3.23486	2.5895	4.00641	3.3782	3.22687	3.53748	4.38085	4.27692	-0.0346371
ENSG00000087303	ENSMUSG00000021806	NID2	0.610017	0.459875	0.388261	0.396502	0.283197	0.301311	0.353063	0.374819	0.478329	0.351513	1.40155	1.31252	-0.0946836
ENSG00000087338	ENSMUSG00000001157	GMCL1	5.39654	5.46289	5.0468	5.77434	3.2146	2.64344	3.06459	3.80926	3.51105	3.94732	4.75588	3.97421	-0.259043
ENSG00000087365	ENSMUSG00000024853	SF3B2	21.8593	20.5242	21.6206	21.401	27.6111	27.9309	27.8594	40.1939	39.7032	39.0097	40.6356	28.8005	-0.496652
ENSG00000087448	ENSMUSG00000040102	KLHL42	6.83191	6.61823	6.64118	6.24961	4.94253	5.20453	5.37478	7.21296	7.35275	7.62579	8.39717	6.17395	-0.44371
ENSG00000087460	ENSMUSG00000027523	GNAS	74.8631	74.9104	65.2579	82.3492	129.263	138.151	131.917	109.116	111.087	97.1607	106.788	134.11	0.328675
ENSG00000087470	ENSMUSG00000022789	DNM1L	13.645	12.605	12.0032	13.1402	7.40908	7.64405	7.49219	9.72166	9.74718	10.0959	10.8549	8.51511	-0.350252
ENSG00000087494	ENSMUSG00000048776	PTHLH	0.066665	0.05948	0.15006	0.05185	0.076184	0.120166	0.210116	0.017582	0.02486	0	1.01415	1.13549	0.163046
ENSG00000087495	ENSMUSG00000027525	PHACTR3	0.461114	0.356935	0.466598	0.493994	0.386351	0.386965	0.371784	1.3443	1.26171	0.987056	2.19769	1.3817	-0.669543
ENSG00000087502	ENSMUSG00000030304	ERGIC2	10.2321	10.5706	11.3168	12.0108	4.30349	4.54802	5.50689	4.67597	4.25903	4.66738	5.53412	5.78613	0.064244
ENSG00000146072	ENSMUSG00000023915	TNFRSF21	7.11362	7.14686	7.57707	7.74278	27.1101	29.1033	27.9733	4.40548	4.42149	3.90562	5.2442	29.0622	2.47035
ENSG00000087586	ENSMUSG00000027496	AURKA	8.44339	8.63327	7.66019	8.96551	7.60748	9.32514	8.54433	7.18651	6.54166	8.10161	8.27659	9.49231	0.197723
ENSG00000087589	ENSMUSG00000074570	CASS4	0.089208	0.00938	0.064005	0.03553	0.005642	0	0.02776	0.019668	0.010045	0	1.0099	1.01113	0.00175557
ENSG00000102996	ENSMUSG00000031790	MMP15	24.6955	29.6856	24.2978	25.1751	134.007	133.519	131.645	23.6114	23.049	23.4912	24.3839	134.057	2.45884
ENSG00000087884	ENSMUSG00000035642	AAMDC	2.51409	2.0082	2.22977	3.14589	3.42473	4.16899	3.51332	3.67387	3.7188	3.3021	4.56492	4.70235	0.0427898
ENSG00000087903	ENSMUSG00000024206	RFX2	1.70118	1.93205	1.73062	1.72092	5.10562	5.81198	4.87218	3.35035	3.61505	3.93669	4.63403	6.26326	0.434647
ENSG00000087916	ENSMUSG00000031089	NA	0	0	0.005184	0	0	0	0	0	0	0	1	1	0
ENSG00000088002	ENSMUSG00000003271	SULT2B1	0.011397	0.061009	0.065299	0.017728	0.022792	0	0.012166	0.056105	0.016754	0	1.02429	1.01165	-0.017905
ENSG00000088035	ENSMUSG00000073792	ALG6	2.16236	2.03812	2.1461	2.24484	0.790471	0.993098	0.966794	0.935921	1.12779	0.875404	1.97971	1.91679	-0.0465954
ENSG00000088038	ENSMUSG00000035632	CNOT3	8.31299	8.23363	7.92218	7.65357	14.1904	13.2038	12.3039	15.2719	15.2367	15.2394	16.2494	14.2327	-0.191173
ENSG00000088053	ENSMUSG00000078810	GP6	0.075773	0.066489	0.045449	0.027762	0.049104	0.018519	0	0.063681	0.108708	0.151756	1.10805	1.02254	-0.115862
ENSG00000088179	ENSMUSG00000026384	PTPN4	4.46269	4.25264	3.98251	3.921	1.81283	1.65456	1.60076	2.54194	2.43951	2.69074	3.5574	2.68938	-0.403547
ENSG00000088205	ENSMUSG00000001674	DDX18	8.1409	7.8256	8.28297	9.44826	5.10287	5.32804	6.02621	7.38075	6.61019	7.62515	8.20536	6.48571	-0.339303
ENSG00000088247	ENSMUSG00000007670	KHSRP	59.4075	56.1653	54.3741	55.4826	68.4443	62.5267	66.9405	119.529	109.177	123.718	118.475	66.9705	-0.822983
ENSG00000088256	ENSMUSG00000034781	GNA11	15.428	15.0515	14.5604	14.9474	28.5746	29.2773	31.2201	36.837	36.7638	35.6821	37.4276	30.6907	-0.286303
ENSG00000088298	ENSMUSG00000038312	EDEM2	5.9708	6.11676	6.65724	6.61076	4.63433	5.37393	4.7001	5.29145	4.576	4.59442	5.82062	5.90278	0.0202226
ENSG00000088305	ENSMUSG00000027478	DNMT3B	2.69211	2.53746	2.09312	2.40493	1.59522	0.916212	1.02913	2.33741	2.78467	3.17052	3.7642	2.18019	-0.787893
ENSG00000088320	ENSMUSG00000000359	REM1	0	0.017234	0	0	0	0	0	0	0	0	1	1	0
ENSG00000088325	ENSMUSG00000027469	TPX2	38.4343	35.8274	35.2387	42.0923	29.1036	29.8203	29.3191	30.9349	30.4747	33.7065	32.7054	30.4143	-0.104777
ENSG00000088356	ENSMUSG00000027472	PDRG1	7.84027	8.09607	7.80674	9.99359	17.6567	17.9278	20.7583	20.4949	15.203	16.98	18.5593	19.7809	0.0919674
ENSG00000088386	ENSMUSG00000025557	SLC15A1	0.007672	0	0	0	0.07823	0.118815	0.074754	0	0	0	1	1.0906	0.125122
ENSG00000088387	ENSMUSG00000025558	DOCK9	0.692883	0.620178	0.65868	0.557783	0.635147	0.762285	0.955574	2.06315	1.89895	1.62509	2.8624	1.78434	-0.681838
ENSG00000088448	ENSMUSG00000031508	ANKRD10	19.0491	22.396	17.1226	18.0848	10.2329	9.94344	7.51841	13.1334	14.5914	14.466	15.0636	10.2316	-0.558036
ENSG00000088451	ENSMUSG00000022130	TGDS	1.67362	2.19895	2.47231	2.43864	1.19591	1.1815	0.68154	0.913043	1.18598	0.9452	2.01474	2.01965	0.00351139
ENSG00000088538	ENSMUSG00000039716	DOCK3	4.15986	3.84651	3.90345	3.13851	3.56021	3.49956	3.34659	3.78499	4.29397	4.10813	5.06236	4.46879	-0.179926
ENSG00000088543	ENSMUSG00000037977	C3orf18	3.4114	3.76166	4.24339	3.66938	4.24873	3.43116	2.77707	5.83639	5.44004	5.2772	6.51788	4.48565	-0.539084
ENSG00000088682	ENSMUSG00000031782	COQ9	5.81238	5.90689	6.1357	5.90575	8.89621	10.4615	8.91844	11.574	12.652	10.8964	12.7075	10.4254	-0.285576
ENSG00000088726	ENSMUSG00000059900	TMEM40	0.009029	0	0.008622	0	0.018057	0	0	0	0	0	1	1.00602	0.00865755
ENSG00000088756	ENSMUSG00000024043	ARHGAP28	0.525286	0.487773	0.441551	0.480156	0.066521	0.061756	0.105967	0.189764	0.279965	0.252734	1.24082	1.07808	-0.202829
ENSG00000088766	ENSMUSG00000027357	CRLS1	8.09854	8.71813	7.8924	9.21961	5.94354	6.31842	7.20639	8.57708	8.28363	8.88964	9.58345	7.48945	-0.355685
ENSG00000088808	ENSMUSG00000021285	PPP1R13B	0.461289	0.436219	0.427646	0.379243	0.744117	0.658162	0.562877	0.921726	0.876515	1.09292	1.96372	1.65505	-0.246713
ENSG00000088812	ENSMUSG00000027312	ATRN	25.3181	24.9173	23.8075	22.6074	15.5575	15.082	14.4898	12.9921	13.1167	13.7812	14.2967	16.0431	0.166272
ENSG00000088826	ENSMUSG00000027333	SMOX	3.89697	3.85713	3.89135	4.05981	6.14442	6.36036	6.10488	5.28275	4.50833	4.11791	5.63633	7.20322	0.353886
ENSG00000088827	ENSMUSG00000027322	SIGLEC1	0.019237	0.014555	0.007789	0.006344	0.015561	0	0.027268	0.00251	0.023421	0.005166	1.01037	1.01428	0.00557324
ENSG00000088833	ENSMUSG00000027455	NSFL1C	8.46179	8.50885	8.50479	8.96073	10.687	11.6455	9.96859	13.8407	14.2852	12.7062	14.6107	11.767	-0.312272
ENSG00000088836	ENSMUSG00000074796	SLC4A11	1.40614	1.25602	1.4614	0.93341	6.00997	5.50185	4.40562	1.97552	2.27439	2.54823	3.26605	6.30581	0.949136
ENSG00000088854	ENSMUSG00000027309	C20orf194	7.32939	6.71114	6.93682	5.98468	4.65944	4.14153	4.65742	5.18324	5.5723	5.3745	6.37668	5.48613	-0.217017
ENSG00000088881	ENSMUSG00000053552	EBF4	13.8262	13.5577	12.0532	12.7609	17.5822	14.3359	14.8163	19.6064	18.6221	19.8636	20.3641	16.5781	-0.296744
ENSG00000088882	ENSMUSG00000027408	CPXM1	34.2581	39.3946	53.9663	36.3995	58.5587	60.0239	57.6729	63.7138	67.5747	62.5063	65.5982	59.7518	-0.134675
ENSG00000088888	ENSMUSG00000037523	MAVS	7.69527	6.70673	6.4309	3.82898	14.9712	14.5023	12.5651	19.8343	16.6759	16.5601	18.6901	15.0129	-0.316077
ENSG00000088899	ENSMUSG00000037703		5.738	5.48984	4.7611	4.06747	6.58404	5.95852	5.64751	11.7992	12.6703	12.8601	13.4432	7.06335	-0.928453
ENSG00000088926	ENSMUSG00000031645	F11	0.008527	0.003559	0.028953	0	0	0	0	0.003314	0.002994	0	1.0021	1	-0.00303032
ENSG00000088930	ENSMUSG00000027433	XRN2	33.6855	32.2062	30.0802	35.7583	19.188	22.5828	22.1288	25.2399	26.6119	25.5742	26.8087	22.2999	-0.265664
ENSG00000088992	ENSMUSG00000029359	TESC	0.050095	0.026171	0.079731	0.090913	0.389605	0.743069	0.356528	0.159274	0.266584	0.163091	1.19632	1.4964	0.322898
ENSG00000089006	ENSMUSG00000027423	SNX5	17.8932	18.4345	18.044	21.5948	14.2145	16.2617	16.6825	17.8723	17.9313	18.1999	19.0012	16.7196	-0.184552
ENSG00000089022	ENSMUSG00000029454	MAPKAPK5	5.46054	5.40942	5.48482	5.43663	6.40428	5.3819	5.62101	6.5697	7.1707	6.59213	7.77751	6.80239	-0.193265
ENSG00000105971	ENSMUSG00000000058	CAV2	0.321176	0.445283	0.535473	0.39071	6.66605	6.52738	7.86539	0.590879	0.358161	0.432438	1.46049	8.01961	2.45708
ENSG00000089048	ENSMUSG00000045624	ESF1	12.6111	12.8856	14.7096	15.4449	8.56292	8.96515	10.864	6.79833	7.02816	7.61706	8.14785	10.464	0.360945
ENSG00000089050	ENSMUSG00000027428	RBBP9	9.88308	9.84167	9.25902	10.9515	6.36074	7.12706	7.23333	6.44625	5.99561	7.49838	7.64675	7.90704	0.0482919
ENSG00000089053	ENSMUSG00000029472	ANAPC5	5.62644	5.49501	5.37403	5.56333	6.21113	5.96173	6.08287	6.48981	7.08009	7.16771	7.91254	7.08524	-0.159323
ENSG00000089057	ENSMUSG00000027340	SLC23A2	16.1365	17.5853	17.1054	15.4092	9.31718	9.84294	9.43429	11.9679	12.4199	12.6069	13.3316	10.5315	-0.340139
ENSG00000089060	ENSMUSG00000032754	SLC8B1	2.32203	2.40959	2.45621	1.96623	2.44978	2.30592	2.21714	2.27337	2.60817	2.48402	3.45518	3.32428	-0.0557193
ENSG00000089091	ENSMUSG00000037259	DZANK1	0.873782	0.914562	0.971529	0.894235	0.555617	0.654597	0.544036	0.59503	0.704296	0.727122	1.67548	1.58475	-0.0803215
ENSG00000089094	ENSMUSG00000029475	KDM2B	6.00529	5.73664	5.24003	5.62558	5.88953	6.2293	5.21642	8.53761	8.2386	8.32252	9.36624	6.77842	-0.466522
ENSG00000089101	ENSMUSG00000037143	CFAP61	0.013183	0.023627	0.045579	0.032738	0.057121	0.07268	0.012509	0.035865	0.057353	0.052072	1.04843	1.04744	-0.00136753
ENSG00000089116	ENSMUSG00000029595	LHX5	0	0	0	0	0	0	0.051255	0.006331	0	0.052128	1.01949	1.01709	-0.00340218
ENSG00000089123	ENSMUSG00000039033	TASP1	1.02089	1.07283	1.04516	1.17529	1.27053	1.4999	1.22429	1.26146	0.87571	0.897707	2.01162	2.33157	0.212942
ENSG00000089154	ENSMUSG00000041638	GCN1	13.2809	11.6101	12.7529	9.90781	21.6895	19.8715	20.5132	30.9162	31.3943	30.2857	31.8654	21.6914	-0.554868
ENSG00000089163	ENSMUSG00000029524	SIRT4	0.530175	0.694722	0.62617	0.392964	0.986879	1.36546	1.32225	0.979837	0.599512	0.716751	1.76537	2.22486	0.333749
ENSG00000089169	ENSMUSG00000029608	RPH3A	0.030981	0.038698	0.07988	0.033734	0.297397	0.263863	0.211468	0.863569	1.00984	0.855496	1.90963	1.25758	-0.602651
ENSG00000089177	ENSMUSG00000038844	KIF16B	0.665627	0.552362	0.781279	0.58172	0.361991	0.339964	0.791621	0.39248	0.391484	0.497094	1.42702	1.49786	0.0698966
ENSG00000089195	ENSMUSG00000037376	TRMT6	2.78054	2.53965	2.78829	3.34094	2.10044	2.23326	3.20219	3.22345	3.51705	3.22666	4.32239	3.51196	-0.29955
ENSG00000089199	ENSMUSG00000027350	CHGB	1.27973	1.0889	1.1716	1.27788	0.453471	0.668283	0.562233	1.58594	1.63927	1.83541	2.68687	1.56133	-0.783153
ENSG00000089225	ENSMUSG00000018263	TBX5	0.007371	0	0	0.011466	0	0	0	0.004536	0	0	1.00151	1	-0.00217971
ENSG00000089234	ENSMUSG00000029458	BRAP	5.72946	5.76456	5.43537	6.31832	4.49899	5.02714	4.88014	6.03023	5.70674	5.60867	6.78188	5.80209	-0.225113
ENSG00000089248	ENSMUSG00000029616	ERP29	26.2213	28.1232	35.2507	33.0257	39.9469	39.303	40.1161	30.0327	29.6721	27.9076	30.2041	40.7887	0.433424
ENSG00000089250	ENSMUSG00000029361	NOS1	0.002801	0	0.002337	0	0	0	0	0.015057	0.00511	0	1.00672	1	-0.00966582
ENSG00000089280	ENSMUSG00000030795	FUS	60.1588	52.6615	55.0075	53.1571	69.8537	61.535	67.6186	128.186	113.296	127.981	124.154	67.3358	-0.882691
ENSG00000089289	ENSMUSG00000031221	IGBP1	16.2802	15.7917	13.1685	19.8845	13.0071	14.9186	13.0316	15.3603	16.0369	14.1858	16.1943	14.6524	-0.144349
ENSG00000089327	ENSMUSG00000009687	FXYD5	0.491672	0.332528	0.400193	0.447126	0.014326	0.025422	0.122361	0.019837	0.02244	0	1.01409	1.05404	0.0557356
ENSG00000089351	ENSMUSG00000001248	GRAMD1A	13.4441	13.3658	12.8389	12.6536	20.8447	21.3672	19.584	22.1987	22.9484	21.7992	23.3154	21.5986	-0.110343
ENSG00000089356	ENSMUSG00000057092	FXYD3	0.115137	0.152141	0.178536	0.134667	0	0	0	0.017002	0	0	1.00567	1	-0.00815315
ENSG00000089472	ENSMUSG00000031209	HEPH	2.10027	2.52685	2.99596	2.63631	1.56276	1.65447	1.19067	0.65386	0.700186	0.74025	1.6981	2.4693	0.540183
ENSG00000089486	ENSMUSG00000004071	CDIP1	11.8566	12.968	12.2872	13.5911	27.6212	27.2106	28.4589	22.1998	20.9805	21.0469	22.4091	28.7636	0.360159
ENSG00000089558	ENSMUSG00000035355	KCNH4	0.036919	0.050711	0.035927	0.050209	0.014213	0.003703	0.033383	0.151462	0.068477	0.026391	1.08211	1.0171	-0.0893861
ENSG00000089597	ENSMUSG00000071650	GANAB	72.7937	77.658	88.6095	79.3217	106.297	105.889	104.63	90.1791	88.1302	90.4107	90.5733	106.605	0.235122
ENSG00000089639	ENSMUSG00000036246	GMIP	7.44265	5.55709	5.69934	4.82089	10.9274	9.48402	8.16379	9.93311	10.8024	11.2372	11.6576	10.5251	-0.14744
ENSG00000089682	ENSMUSG00000031433	RBM41	2.01181	1.55775	1.7238	1.62377	1.03207	0.912683	0.801721	0.618029	0.678966	0.917306	1.7381	1.91549	0.140203
ENSG00000089685	ENSMUSG00000017716	BIRC5	18.8152	18.3188	16.1026	21.9154	25.6428	26.6073	27.6249	30.6793	27.8189	27.8933	29.7971	27.625	-0.109199
ENSG00000089692	ENSMUSG00000030124	LAG3	0.325132	0.337225	0.404307	0.352556	0.428869	0.637734	0.877303	0.494402	0.568338	0.389655	1.48413	1.64797	0.15107
ENSG00000089723	ENSMUSG00000021203	OTUB2	1.21428	1.07351	1.39433	1.29361	0.865399	1.18187	1.00704	1.49239	1.27445	1.20679	2.32454	2.0181	-0.203949
ENSG00000089737	ENSMUSG00000041645	DDX24	22.5799	22.1109	24.9725	24.1837	18.1722	19.8391	18.1674	22.6261	23.6226	22.7717	24.0068	19.7263	-0.283325
ENSG00000089775	ENSMUSG00000056459	ZBTB25	4.67417	4.54775	4.91844	4.21456	3.75997	4.2071	4.12982	5.13943	5.63429	5.0468	6.27351	5.0323	-0.318056
ENSG00000089818	ENSMUSG00000030327	NECAP1	6.62927	7.14535	7.21623	7.73569	4.55728	4.56218	3.94435	5.59068	6.59499	6.7106	7.29876	5.3546	-0.446871
ENSG00000089820	ENSMUSG00000031389	ARHGAP4	3.38373	3.21152	3.34997	3.61944	4.45178	4.64945	4.31729	5.28642	5.64106	5.06558	6.33102	5.47284	-0.210148
ENSG00000089847	ENSMUSG00000054708	ANKRD24	0.23788	0.352161	0.380128	0.190093	0.468008	0.563607	0.675013	0.640662	0.578423	0.671472	1.63019	1.56888	-0.055305
ENSG00000089876	ENSMUSG00000030986	DHX32	7.70979	8.11875	8.95913	9.3426	6.03776	5.51472	6.57644	7.02887	7.78345	6.93659	8.24964	7.04297	-0.228145
ENSG00000089902	ENSMUSG00000037896	RCOR1	9.43608	9.12029	7.89797	8.76613	4.55126	5.20532	5.09893	7.38574	7.35089	7.7907	8.50911	5.95184	-0.515673
ENSG00000090006	ENSMUSG00000040488	LTBP4	5.01929	5.25539	5.37214	4.0398	11.6749	10.9616	10.7203	19.4763	20.2316	19.6697	20.7925	12.1189	-0.7788
ENSG00000090013	ENSMUSG00000040466	BLVRB	4.32765	5.9189	7.80197	6.98984	11.7847	11.7253	11.7488	16.4303	15.45	13.0193	15.9665	12.753	-0.324217
ENSG00000090020	ENSMUSG00000028854	SLC9A1	4.68675	5.43447	6.19547	4.82714	5.58349	4.80509	4.9845	5.0389	5.43451	5.50436	6.32592	6.12436	-0.0467172
ENSG00000090054	ENSMUSG00000021468	SPTLC1	23.912	25.779	27.9261	29.4579	11.2256	10.2037	10.9258	8.86936	9.0523	9.09386	10.0052	11.785	0.236209
ENSG00000090061	ENSMUSG00000021258	CCNK	6.40637	6.63528	6.55784	6.67055	5.79007	4.82546	5.10618	6.06311	5.48776	6.39847	6.98312	6.24057	-0.162194
ENSG00000090097	ENSMUSG00000023495	PCBP4	21.5441	22.8676	18.7524	20.9699	43.3551	47.1474	43.5726	38.3082	39.6512	39.0845	40.0146	45.6917	0.191404
ENSG00000090104	ENSMUSG00000026358	RGS1	0	0	0	0	0	0	0	0	0.004078	0	1.00136	1	-0.00195977
ENSG00000090238	ENSMUSG00000042675	YPEL3	10.588	11.6103	9.04195	12.2325	7.3011	8.14085	7.23037	8.1929	7.34594	6.90913	8.48266	8.55744	0.0126628
ENSG00000090263	ENSMUSG00000029918	MRPS33	4.56235	4.63989	5.39212	6.66798	5.07775	7.05673	6.00374	4.94727	4.13247	4.26117	5.44697	7.04607	0.371365
ENSG00000090266	ENSMUSG00000002416	NDUFB2	6.25159	6.2441	6.26891	6.27411	6.8909	8.49683	9.39723	9.62758	8.0436	8.09144	9.58754	9.26165	-0.0498906
ENSG00000090273	ENSMUSG00000028851	NUDC	19.5896	18.3361	19.6101	22.1376	38.0041	40.066	40.1194	57.1703	51.474	51.5501	54.3981	40.3965	-0.429327
ENSG00000090316	ENSMUSG00000079562	MAEA	4.73374	4.79996	4.80437	4.8856	8.72603	9.36441	8.14414	9.3658	9.5742	9.04463	10.3282	9.74486	-0.083877
ENSG00000109625	ENSMUSG00000036596	CPZ	0.026363	0.027526	0.016565	0.019114	4.24701	4.34575	4.7149	0.014233	0	0	1.00474	5.43589	2.43569
ENSG00000090372	ENSMUSG00000030374	STRN4	15.2308	15.0127	13.4189	14.9506	23.3371	23.7605	22.2735	33.7569	35.0918	33.033	34.9606	24.1237	-0.535278
ENSG00000090376	ENSMUSG00000020227	IRAK3	0.132167	0.155777	0.164346	0.161259	0.012858	0.005904	0	0.033631	0.030211	0.052938	1.03893	1.00625	-0.0460993
ENSG00000090402	ENSMUSG00000027790	SI	0	0.004675	0	0	0	0	0	0	0	0	1	1	0
ENSG00000090432	ENSMUSG00000041241	MUL1	17.3275	17.8098	19.9528	20.2213	21.1196	22.9942	23.185	20.8854	20.3358	18.3804	20.8672	23.4329	0.167301
ENSG00000090470	ENSMUSG00000041837	PDCD7	8.39798	7.90209	8.362	8.86062	11.6313	11.2036	13.7279	14.8607	15.3805	13.8745	15.7053	13.1876	-0.252065
ENSG00000090512	ENSMUSG00000022871	FETUB	0	0	0	0	0	0.025062	0	0	0.033183	0	1.01106	1.00835	-0.00386783
ENSG00000124216	ENSMUSG00000042821	SNAI1	0.304326	0.068078	0.109296	0.207708	4.49248	5.45915	5.16173	0.117385	0.079671	0.157057	1.11804	6.03778	2.43305
ENSG00000090534	ENSMUSG00000022847	THPO	0.121427	0.172319	0.179686	0.242681	0.027989	0.223931	0.228828	0.151214	0.199068	0.164867	1.17172	1.16025	-0.0141885
ENSG00000090539	ENSMUSG00000006958	CHRD	1.26593	1.12048	1.0216	1.10721	1.63631	1.20537	1.20151	1.10015	1.13138	1.37033	2.20062	2.34773	0.0933552
ENSG00000090554	ENSMUSG00000089989	FLT3LG	2.46659	2.57033	2.72501	2.97381	2.29269	2.60069	2.44298	2.52725	3.23892	2.24883	3.67167	3.44545	-0.0917411
ENSG00000090565	ENSMUSG00000037098	RAB11FIP3	10.8545	10.0769	9.82105	8.63721	28.7951	28.5193	28.5589	27.0826	26.3725	24.6117	27.0223	29.6245	0.132638
ENSG00000090581	ENSMUSG00000035521	GNPTG	16.1584	18.8014	19.5862	21.4521	19.3784	21.6916	17.9143	15.2185	16.3235	16.5022	17.0147	20.6614	0.280156
ENSG00000090615	ENSMUSG00000029502	GOLGA3	6.49882	5.86667	6.01333	4.97322	11.0202	10.2607	10.2739	11.1936	11.8485	11.302	12.448	11.5183	-0.111992
ENSG00000090661	ENSMUSG00000008206	CERS4	10.3874	12.942	13.3389	13.0653	8.70742	10.4045	9.50252	7.3397	7.45812	6.85631	8.21804	10.5382	0.358757
ENSG00000090674	ENSMUSG00000004567	MCOLN1	5.48929	6.30299	7.04836	6.63654	9.9772	10.4921	8.8742	7.87948	7.6602	7.17601	8.5719	10.7812	0.330828
ENSG00000090686	ENSMUSG00000043411	USP48	6.77654	7.19531	7.41884	6.98136	4.87443	5.26514	4.92787	6.40389	6.53328	6.38758	7.44158	6.02248	-0.305252
ENSG00000090776	ENSMUSG00000031217	EFNB1	45.8481	52.4335	56.2126	52.5008	65.4026	63.9513	62.3598	47.8584	45.7264	46.4913	47.692	64.9045	0.444571
ENSG00000090861	ENSMUSG00000031960	AARS	19.9834	20.3432	21.0793	20.0875	34.5735	36.9739	31.3702	44.5834	40.9666	43.4878	44.0126	35.3059	-0.318008
ENSG00000090863	ENSMUSG00000003316	GLG1	29.6175	28.4594	46.4635	26.9995	20.9696	21.1611	20.3536	21.3736	21.1156	22.7214	22.7369	21.8281	-0.05885
ENSG00000090905	ENSMUSG00000052707	TNRC6A	9.81972	9.08604	8.95159	8.30673	8.37006	9.13395	9.21012	7.16646	7.88824	7.41566	8.49012	9.90471	0.222329
ENSG00000133135	ENSMUSG00000031438	RNF128	0.421691	0.861178	0.456389	0.743422	5.16542	4.91914	5.71254	0.103799	0.171234	0.213661	1.1629	6.2657	2.42975
ENSG00000090971	ENSMUSG00000035285	NAT14	18.2042	22.2038	23.7772	24.0555	46.5566	42.8811	47.4716	41.1696	36.6048	37.308	39.3608	46.6364	0.244699
ENSG00000090975	ENSMUSG00000029406	PITPNM2	1.602	1.6112	1.86576	1.30331	1.98208	1.67431	1.86872	3.00259	3.6631	3.38718	4.35096	2.8417	-0.614577
ENSG00000090989	ENSMUSG00000036435	EXOC1	12.745	13.552	13.4828	13.3486	6.21458	5.85736	6.35273	5.8179	6.27004	6.36201	7.14999	7.14156	-0.00170144
ENSG00000091009	ENSMUSG00000024491	RBM27	7.08857	6.19376	6.47798	6.35483	3.65856	3.64171	4.12456	4.32974	4.83638	4.50885	5.55832	4.80828	-0.20913
ENSG00000091010	ENSMUSG00000024497	POU4F3	0.068022	0	0.051967	0.063487	0.020406	0.021457	0.029047	0.100462	0.049719	0.120629	1.09027	1.02364	-0.0909817
ENSG00000091039	ENSMUSG00000020189	OSBPL8	14.961	14.4251	12.6394	14.7328	5.96842	5.16585	6.60132	7.98933	7.38478	8.51435	8.96282	6.91186	-0.374878
ENSG00000091073	ENSMUSG00000004947	DTX2	1.2325	1.07308	1.27107	1.33588	2.11925	2.08471	1.62091	2.29968	2.57809	2.44381	3.44053	2.94163	-0.226015
ENSG00000091106	ENSMUSG00000039193	NLRC4	0.188874	0.097881	0.227423	0.109393	0.005916	0.073484	0.018948	0.09636	0.023349	0.11256	1.07742	1.03278	-0.0610481
ENSG00000091127	ENSMUSG00000057541	PUS7	2.12437	1.8306	2.18293	2.10436	2.40532	2.23133	3.2678	3.1943	3.55589	3.76159	4.50393	3.63482	-0.3093
ENSG00000091129	ENSMUSG00000020598	NRCAM	42.1083	42.2817	52.0365	42.94	38.8953	38.113	38.0978	19.2863	19.4768	19.1214	20.2948	39.3687	0.955935
ENSG00000159200	ENSMUSG00000022951	RCAN1	5.90559	6.57602	7.1212	7.66675	52.9868	53.8742	54.5964	9.5662	9.19715	9.29181	10.3517	54.8192	2.40481
ENSG00000091137	ENSMUSG00000020651	SLC26A4	0.207281	0.243398	0.178853	0.241826	0.005545	0.031646	0.041437	0.067572	0.084087	0.049305	1.06699	1.02621	-0.0562189
ENSG00000091138	ENSMUSG00000001225	SLC26A3	0	0.008485	0.018162	0.001265	0	0	0	0	0	0	1	1	0
ENSG00000091140	ENSMUSG00000020664	DLD	12.0552	12.7309	13.9835	14.5114	9.9522	10.098	11.2844	9.84938	9.51571	10.3407	10.9019	11.4449	0.0701194
ENSG00000091157	ENSMUSG00000040560	WDR7	3.10021	3.19867	3.28132	2.90593	2.34056	2.52862	2.20348	2.61728	2.45246	2.60607	3.5586	3.35755	-0.083899
ENSG00000091164	ENSMUSG00000024583	TXNL1	5.27793	5.50479	5.3034	6.7858	3.26283	3.47972	4.18488	4.41687	4.45542	4.48573	5.45268	4.64248	-0.232069
ENSG00000091181	ENSMUSG00000005364	IL5RA	0	0.008274	0	0.007407	0.006766	0	0	0	0.001636	0	1.00055	1.00226	0.00246356
ENSG00000091262	ENSMUSG00000030834	ABCC6	0.110733	0.191504	0.161959	0.120349	0.246476	0.283345	0.120624	0.110826	0.053998	0.040278	1.06837	1.21681	0.187702
ENSG00000091317	ENSMUSG00000032434	CMTM6	24.198	26.5117	27.8835	32.456	9.30621	8.74519	10.094	9.70241	8.90714	9.39904	10.3362	10.3818	0.00635233
ENSG00000091409	ENSMUSG00000027111	ITGA6	39.5404	40.683	42.2105	40.9029	7.73113	8.6271	7.80984	11.7932	11.4056	11.0448	12.4146	9.05602	-0.455085
ENSG00000091428	ENSMUSG00000049044	RAPGEF4	1.70125	1.76101	1.47321	1.66901	0.400042	0.622279	0.618874	1.92385	2.23495	2.1071	3.08863	1.54706	-0.997434
ENSG00000091436	ENSMUSG00000004085		4.28537	4.14684	3.60812	4.29217	4.4767	3.93597	4.93178	2.52744	2.15103	2.38832	3.3556	5.44815	0.699197
ENSG00000091482	ENSMUSG00000041476	SMPX	0	0.028862	0	0.009336	0	0	0	0	0.056507	0	1.01884	1	-0.0269214
ENSG00000091483	ENSMUSG00000026526	FH	16.9273	16.4721	16.3191	19.797	14.345	17.3515	16.5002	23.3488	23.7258	21.5787	23.8844	17.0656	-0.484984
ENSG00000091490	ENSMUSG00000029189	SEL1L3	17.7936	20.6662	20.7423	20.0954	21.6152	22.1713	21.455	37.2793	37.6632	38.291	38.7445	22.7472	-0.768306
ENSG00000091527	ENSMUSG00000032803	CDV3	29.0751	27.2442	28.0926	29.4778	26.0573	28.0587	29.194	25.8537	25.0883	24.4587	26.1336	28.77	0.138663
ENSG00000091536	ENSMUSG00000042678	MYO15A	0.042866	0.036962	0.054369	0.035294	0.040285	0.014594	0.048649	0.054419	0.048856	0.05957	1.05428	1.03451	-0.0273137
ENSG00000091542	ENSMUSG00000042650	ALKBH5	19.0887	20.5984	20.3518	21.3356	30.0092	29.2927	29.3465	31.4575	28.7517	26.6096	29.9396	30.5495	0.0290921
ENSG00000091583	ENSMUSG00000000049	APOH	0	0.021543	0.023057	0.018779	0	0	0	0	0	0	1	1	0
ENSG00000091640	ENSMUSG00000018287	SPAG7	8.99548	8.58773	8.3703	10.8642	15.8547	16.6331	17.3569	20.9274	20.5454	19.0198	21.1642	17.6149	-0.264827
ENSG00000091656	ENSMUSG00000025255	ZFHX4	9.20954	9.41055	9.49958	7.87986	4.14085	4.35693	4.55864	2.44951	2.83485	2.89433	3.72623	5.35214	0.522398
ENSG00000091664	ENSMUSG00000030500	SLC17A6	0.030492	0	0.228682	0.005929	0.20594	0.360691	0.323802	0.140728	0.078129	0.063907	1.09425	1.29681	0.24502
ENSG00000091704	ENSMUSG00000054446	CPA1	0	0	0	0	0.014679	0.014966	0	0	0	0	1	1.00988	0.0141863
ENSG00000091732	ENSMUSG00000039130	ZC3HC1	6.06184	6.17794	5.87682	6.33334	6.18769	6.87503	8.16242	9.21784	9.63595	9.35459	10.4028	8.07504	-0.365429
ENSG00000091831	ENSMUSG00000019768	ESR1	0.095889	0.104931	0.105904	0.067444	0.058986	0.009304	0	0.02178	0.020942	0.008967	1.01723	1.02276	0.0078269
ENSG00000091879	ENSMUSG00000031465	ANGPT2	0.131243	0.127366	0.105614	0.099603	0.103895	0.20545	0.231917	0.210911	0.201309	0.207233	1.20648	1.18042	-0.0315081
ENSG00000091947	ENSMUSG00000020921	TMEM101	4.92947	5.37158	5.6285	6.08692	8.50539	7.90595	7.8639	7.7983	7.44769	7.1371	8.46103	9.09174	0.103724
ENSG00000091972	ENSMUSG00000022661	CD200	10.5334	11.1848	10.4445	12.3834	3.95613	4.47841	3.15863	6.17443	7.37879	6.84166	7.7983	4.86439	-0.6809
ENSG00000122861	ENSMUSG00000021822	PLAU	0.970854	0.837358	0.992395	1.31005	17.8626	18.6994	18.1556	2.61226	2.83243	2.50693	3.65054	19.2392	2.39787
ENSG00000092009	ENSMUSG00000022225	CMA1	0.029581	0	0.02372	0.030911	0.011139	0	0	0	0	0	1	1.00371	0.00534681
ENSG00000092010	ENSMUSG00000022216	PSME1	31.9244	34.4336	44.4779	45.743	28.1435	29.4906	27.9423	28.3377	26.2518	23.7393	27.1096	29.5255	0.123157
ENSG00000092020	ENSMUSG00000021022	PPP2R3C	6.91259	7.0873	6.81979	8.99598	5.34535	5.02335	4.49128	5.38938	5.0602	4.8851	6.11156	5.95333	-0.0378441
ENSG00000092054	ENSMUSG00000053093	MYH7	0.211342	0.147781	0.206436	0.147939	0.517758	0.554169	0.518925	1.19111	1.06618	0.826255	2.02785	1.53028	-0.406151
ENSG00000092067	ENSMUSG00000052435	CEBPE	0	0	0	0	0	0	0	0.006368	0	0	1.00212	1	-0.00305912
ENSG00000092068	ENSMUSG00000022180	SLC7A8	0.048712	0.024146	0.072361	0.050516	0.396892	0.590831	0.523884	0.161036	0.200369	0.123407	1.1616	1.50387	0.372561
ENSG00000092094	ENSMUSG00000006289	OSGEP	6.06873	5.66689	5.68414	5.35274	6.26451	6.28861	5.66922	6.38764	7.73286	7.69438	8.27163	7.07412	-0.225621
ENSG00000092096	ENSMUSG00000022199	SLC22A17	43.4955	45.8283	41.9258	44.9511	52.756	49.9007	47.4693	43.2982	43.7827	45.0053	45.0287	51.042	0.18084
ENSG00000092108	ENSMUSG00000020952	SCFD1	6.18321	6.52927	6.47014	7.26002	3.25348	3.41717	3.43702	3.90905	3.66962	4.30662	4.96176	4.36922	-0.183476
ENSG00000092140	ENSMUSG00000035293	G2E3	5.61236	5.60925	4.8533	5.56581	1.14478	1.34191	1.39927	1.70176	1.33859	1.9047	2.64835	2.29532	-0.206399
ENSG00000092148	ENSMUSG00000035247	HECTD1	13.2646	12.1309	11.7966	10.8209	9.49852	9.19431	9.05363	8.81385	9.19852	8.70407	9.90548	10.2488	0.0491584
ENSG00000092199	ENSMUSG00000060373	HNRNPC	63.8764	64.9464	65.4178	79.1585	44.7126	44.1734	45.4605	54.2639	54.3002	54.4432	55.3358	45.7822	-0.273426
ENSG00000092200	ENSMUSG00000057132	RPGRIP1	0.062313	0.063088	0.079991	0.07123	0.039023	0.05315	0.033439	0.043773	0.012888	0.057808	1.03816	1.04187	0.00515249
ENSG00000092201	ENSMUSG00000035726	SUPT16H	29.7746	27.8252	27.8132	29.6526	20.1547	20.8889	22.5643	28.2845	26.9471	27.3141	28.5152	22.2026	-0.361003
ENSG00000092208	ENSMUSG00000060121	GEMIN2	2.57822	2.76201	2.40015	3.25556	1.8548	1.98531	1.53679	2.56681	2.37674	3.24115	3.72823	2.7923	-0.417038
ENSG00000092295	ENSMUSG00000022218	TGM1	0.548536	0.44049	0.505488	0.422011	0.941306	0.903139	0.676973	0.474593	0.753942	0.684171	1.63757	1.84047	0.168521
ENSG00000092330	ENSMUSG00000007589	TINF2	10.9127	10.6226	9.75657	12.4822	16.102	16.0328	13.9702	16.7163	16.8931	17.4105	18.0066	16.3683	-0.137619
ENSG00000092345	ENSMUSG00000010592	DAZL	0.039858	0.067173	0.084583	0.070522	0	0.00432	0	0.051781	0	0.028049	1.02661	1.00144	-0.0358122
ENSG00000092421	ENSMUSG00000019647	SEMA6A	36.3965	36.4075	40.5826	32.9702	32.8125	31.7768	32.5886	23.6605	25.6085	23.7336	25.3342	33.3926	0.398442
ENSG00000092439	ENSMUSG00000027365	TRPM7	7.30174	7.11369	7.4395	6.31151	2.91637	2.95701	3.34217	2.52042	2.52675	2.57845	3.54187	4.07185	0.201172
ENSG00000092445	ENSMUSG00000027298	TYRO3	9.80439	10.8129	11.4462	10.9057	19.7642	19.3998	18.7869	27.1805	27.4989	25.8758	27.8517	20.317	-0.455081
ENSG00000092470	ENSMUSG00000027242	WDR76	7.89346	7.81809	7.12472	9.05999	3.97638	5.18213	3.56747	8.03737	7.61195	7.73865	8.79599	5.24199	-0.746732
ENSG00000092529	ENSMUSG00000079110	CAPN3	1.0694	1.13166	1.55746	1.08002	0.899065	1.11671	0.830999	0.680902	0.75624	0.561345	1.66616	1.94892	0.226149
ENSG00000092531	ENSMUSG00000027287	SNAP23	6.73156	6.62667	6.24688	7.63872	3.23079	3.33401	3.53675	3.57584	4.00911	3.95408	4.84635	4.36718	-0.150195
ENSG00000092607	ENSMUSG00000027868	TBX15	0.05915	0.045236	0.088764	0.039433	0	0.026655	0.054126	0.0104	0.013235	0.064222	1.02929	1.02693	-0.00330981
ENSG00000163814	ENSMUSG00000035498	CDCP1	0.143333	0.057328	0.195006	0.089073	4.58045	4.1353	4.86847	0.051706	0.02173	0.102374	1.0586	5.52807	2.38461
ENSG00000177283	ENSMUSG00000036904	FZD8	36.7551	46.5459	47.284	42.4002	80.3317	77.9949	70.376	14.4206	13.7327	13.5737	14.909	77.2342	2.37306
ENSG00000092847	ENSMUSG00000041530	AGO1	10.2898	8.7831	7.54107	8.00092	7.63189	6.98867	7.64152	8.76661	8.49949	8.8218	9.69596	8.42069	-0.203445
ENSG00000092850	ENSMUSG00000028845	TEKT2	1.09462	1.06998	1.18403	1.14539	1.22145	1.42775	1.71735	1.36748	1.01384	1.30071	2.22734	2.45552	0.140703
ENSG00000092853	ENSMUSG00000042489	CLSPN	5.30852	3.99766	4.31006	4.08701	5.2231	5.29265	5.95349	7.30411	7.62872	6.97795	8.30359	6.48975	-0.355573
ENSG00000092871	ENSMUSG00000020696	RFFL	8.66301	9.07912	10.1728	9.36077	7.70969	8.07542	8.77054	13.124	13.198	13.5424	14.2881	9.18521	-0.637434
ENSG00000092929	ENSMUSG00000057948	UNC13D	0.424836	0.37844	0.425195	0.25914	0.283444	0.117223	0.324561	0.147471	0.284826	0.339166	1.25715	1.24174	-0.0177955
ENSG00000092964	ENSMUSG00000022048	DPYSL2	76.6502	72.0156	63.8054	73.8639	91.9899	94.0638	94.8467	87.0903	81.3201	85.6893	85.6999	94.6335	0.143058
ENSG00000092969	ENSMUSG00000039239	TGFB2	45.4783	44.3486	58.8618	45.6314	23.9343	21.7962	27.2789	13.4304	12.0429	13.8405	14.1046	25.3365	0.845047
ENSG00000093009	ENSMUSG00000000028	CDC45	6.12698	5.94158	5.36978	6.55065	8.41083	10.7377	9.91642	11.9647	13.6867	12.0275	13.5596	10.6883	-0.343283
ENSG00000093010	ENSMUSG00000000326	COMT	17.2075	21.9183	21.3437	21.939	20.8056	20.3763	18.2872	17.092	17.0142	16.3423	17.8162	20.823	0.224994
ENSG00000093134	ENSMUSG00000020010	VNN3	0	0	0	0.013008	0	0	0	0	0	0	1	1	0
ENSG00000093144	ENSMUSG00000019883	ECHDC1	5.5336	5.89611	6.10618	7.28833	8.02753	10.1787	8.89565	5.16564	4.13343	5.2468	5.84863	10.034	0.778723
ENSG00000093167	ENSMUSG00000032497	LRRFIP2	2.97355	3.30207	3.46443	3.11592	3.57902	4.47803	4.58224	2.68065	2.32643	2.40896	3.47201	5.2131	0.586369
ENSG00000093183	ENSMUSG00000061536	SEC22C	6.81715	6.74491	6.7518	6.34978	6.03057	5.47138	5.61894	5.88223	5.92437	5.86838	6.89166	6.70696	-0.0391923
ENSG00000093217	ENSMUSG00000035769	XYLB	0.510925	0.405334	0.457468	0.366646	0.937896	0.729958	0.816204	1.24831	1.07174	1.10687	2.1423	1.82802	-0.228883
ENSG00000094631	ENSMUSG00000031161	HDAC6	9.61705	8.00606	8.53942	7.95061	11.9125	10.2753	10.4381	11.4678	12.9603	13.3168	13.5816	11.8753	-0.193693
ENSG00000094661	ENSMUSG00000071185	OR1I1	0	0	0	0	0	0	0	0	0	0	1	1	0
ENSG00000094755	ENSMUSG00000020159	GABRP	0.121795	0.169826	0.162833	0.151567	0	0.005489	0	0.081374	0.061771	0.077139	1.07343	1.00183	-0.0995882
ENSG00000094804	ENSMUSG00000017499	CDC6	5.83073	4.66506	5.25521	6.79814	7.41986	8.2543	7.67367	12.3427	12.2557	11.3975	12.9986	8.78261	-0.565636
ENSG00000094880	ENSMUSG00000024370	CDC23	10.1583	10.1437	9.95612	11.4308	6.29436	6.10702	5.95742	8.10329	7.71833	7.53023	8.78395	7.1196	-0.303073
ENSG00000094914	ENSMUSG00000036678	AAAS	10.4396	11.1703	10.2121	11.3217	11.07	12.594	11.5344	18.4163	19.7442	19.1563	20.1056	12.7328	-0.65905
ENSG00000094916	ENSMUSG00000009575	CBX5	47.0323	42.2107	38.3787	38.1515	28.1687	26.8427	32.5469	38.4518	32.3595	37.0995	36.9703	30.1861	-0.292481
ENSG00000094963	ENSMUSG00000040170	FMO2	0.017364	0.016097	0	0.012028	0	0.012089	0	0.006344	0.008074	0.003265	1.00589	1.00403	-0.00267686
ENSG00000182492	ENSMUSG00000031375	BGN	0.727489	0.844314	1.10338	0.844804	6.93624	6.86448	7.17307	0.645362	0.44975	0.593043	1.56272	7.99127	2.35437
ENSG00000095002	ENSMUSG00000024151	MSH2	16.2972	15.8649	17.2945	18.6605	8.83606	9.85081	11.081	15.6724	14.4206	15.6016	16.2315	10.9226	-0.571477
ENSG00000109099	ENSMUSG00000018217	PMP22	23.4584	25.9411	31.6252	30.2264	70.6899	73.3256	71.2298	13.1137	13.7876	12.9268	14.276	72.7484	2.34932
ENSG00000095059	ENSMUSG00000060038	DHPS	13.4897	13.7618	12.0292	13.7053	18.8466	20.1701	17.3396	31.7304	30.058	30.3423	31.7102	19.7854	-0.680509
ENSG00000095066	ENSMUSG00000052566	HOOK2	2.52569	2.45416	2.82995	2.37743	7.73539	8.0172	7.64966	5.81364	5.78137	6.24	6.945	8.80075	0.341652
ENSG00000095139	ENSMUSG00000032096	ARCN1	25.7054	24.9049	23.6128	27.1577	23.7074	26.7409	27.1429	28.8952	29.4499	29.5649	30.3033	26.8637	-0.173816
ENSG00000095203	ENSMUSG00000028434	EPB41L4B	0.133547	0.105951	0.072523	0.161997	0.212209	0.150912	0.239937	0.212733	0.198133	0.177089	1.19599	1.20102	0.00606008
ENSG00000095209	ENSMUSG00000028420	TMEM38B	3.5386	3.87	4.7345	4.76919	1.69815	1.8134	1.82159	1.21416	1.41592	1.15413	2.2614	2.77771	0.296681
ENSG00000095261	ENSMUSG00000026869	PSMD5	6.46075	6.44438	6.14146	6.70282	4.38037	4.46687	3.73802	3.9101	3.73378	4.0942	4.91269	5.19509	0.080634
ENSG00000130287	ENSMUSG00000002341	NCAN	386.998	375.011	406.434	347.69	1275.04	1196.03	1168.54	240.931	229.134	247.148	240.071	1214.21	2.33848
ENSG00000095321	ENSMUSG00000026853	CRAT	9.66076	10.7017	10.0068	9.91254	22.0352	22.2454	19.488	30.5248	29.4596	28.8862	30.6235	22.2562	-0.460434
ENSG00000095370	ENSMUSG00000059013	SH2D3C	0.567402	0.630462	0.665738	0.501211	0.88512	0.659019	0.686823	1.97651	1.92208	2.25833	3.05231	1.74365	-0.807786
ENSG00000095383	ENSMUSG00000039813	TBC1D2	0.790876	0.737165	0.825797	0.65175	1.50043	1.39519	0.965181	1.13639	1.38201	1.20178	2.24006	2.28693	0.0298784
ENSG00000095397	ENSMUSG00000039137	WHRN	3.0999	3.5832	4.0443	2.92901	6.08853	5.27666	5.47841	4.17822	4.69255	5.05972	5.6435	6.61453	0.22905
ENSG00000095464	ENSMUSG00000024992	PDE6C	0.146831	0.161633	0.077831	0.09869	0.054289	0	0	0.021832	0.024196	0.030971	1.02567	1.0181	-0.0106874
ENSG00000095485	ENSMUSG00000025200	CWF19L1	4.69289	4.50446	4.57388	4.96261	4.33103	3.49487	3.46787	5.2896	4.71989	5.1991	6.06953	4.76459	-0.349234
ENSG00000095539	ENSMUSG00000025207	SEMA4G	3.35222	3.53769	3.3707	3.03375	5.06138	4.70407	4.60492	4.10618	4.78664	4.35336	5.41539	5.79012	0.0965274
ENSG00000095564	ENSMUSG00000040565	BTAF1	12.4356	12.045	11.5267	10.317	6.62973	6.53282	5.97062	7.68187	8.62259	9.54443	9.61629	7.37772	-0.382306
ENSG00000095585	ENSMUSG00000061132	BLNK	0	0.004737	0.012485	0.00675	0.01157	0.009905	0	0.005727	0.003309	0.019092	1.00938	1.00716	-0.00317318
ENSG00000095587	ENSMUSG00000025013	TLL2	0.035511	0.056095	0.084505	0.049101	0.472135	0.2312	0.386414	0.072969	0.078278	0.076218	1.07582	1.36325	0.341611
ENSG00000095627	ENSMUSG00000025081	TDRD1	0	0	0	0	0	0	0	0	0	0	1	1	0
ENSG00000180628	ENSMUSG00000024805	PCGF5	5.27928	5.99452	5.83455	6.55021	11.3751	10.5594	12.1926	1.44026	1.24897	1.6972	2.46214	12.3757	2.32953
ENSG00000095777	ENSMUSG00000025716	MYO3A	0.894328	0.800546	0.692014	0.713975	0.021946	0.030975	0	0.118437	0.20582	0.128295	1.15085	1.01764	-0.177473
ENSG00000095787	ENSMUSG00000024283	WAC	15.4833	14.5818	14.1199	15.8286	9.73894	9.04191	10.3669	11.3332	11.7988	11.6109	12.5809	10.7159	-0.231485
ENSG00000095794	ENSMUSG00000063889	CREM	1.92158	1.86063	2.08178	2.48851	2.02513	1.3105	1.90006	2.59296	2.68772	2.68915	3.65661	2.74523	-0.413581
ENSG00000095906	ENSMUSG00000039183	NUBP2	6.96945	7.32891	6.37236	7.41592	17.8617	19.2189	17.5222	26.4709	24.1439	25.7531	26.456	19.2009	-0.462417
ENSG00000095951	ENSMUSG00000021366	HIVEP1	2.4247	2.08846	2.52943	1.75982	1.70328	2.06121	1.9831	1.44788	1.76822	1.59385	2.60332	2.91586	0.163572
ENSG00000095970	ENSMUSG00000023992	TREM2	0	0	0	0	0.005152	0	0	0	0	0	1	1.00172	0.00247546
ENSG00000095981	ENSMUSG00000023387	KCNK16	0	0	0	0	0	0	0	0	0	0	1	1	0
ENSG00000179348	ENSMUSG00000015053	GATA2	0.026146	0.025741	0.034439	0.016829	4.0758	4.11524	4.14428	0.035508	0.003766	0.02284	1.0207	5.11177	2.32426
ENSG00000096063	ENSMUSG00000004865	SRPK1	7.18973	7.15138	6.30436	8.22199	4.36562	3.53249	3.65898	5.66489	5.845	5.65144	6.72045	4.85236	-0.469869
ENSG00000096070	ENSMUSG00000063952	BRPF3	8.33083	8.08703	6.60997	7.00734	6.98238	6.67298	6.30207	10.4928	10.7406	11.1492	11.7942	7.65248	-0.624079
ENSG00000096080	ENSMUSG00000023967	MRPS18A	11.2714	11.7599	14.149	14.1978	20.8129	23.34	23.2208	40.4407	39.0589	36.0374	39.5123	23.4579	-0.75223
ENSG00000096088	ENSMUSG00000023987	PGC	0	0.01417	0.015167	0	0	0	0	0	0	0.005029	1.00168	1	-0.00241641
ENSG00000096092	ENSMUSG00000025933	TMEM14A	17.6531	24.3323	26.1992	29.0828	10.5922	7.20388	10.383	9.82467	7.05695	8.54821	9.47661	10.393	0.133171
ENSG00000096093	ENSMUSG00000041809	EFHC1	3.29051	3.50179	3.35274	3.23829	4.8594	4.43486	4.46007	2.62201	3.042	3.05569	3.90656	5.58477	0.515599
ENSG00000096401	ENSMUSG00000023932	CDC5L	12.3485	12.0019	11.8388	12.7859	6.40585	7.08101	8.42849	9.74922	8.69294	8.98489	10.1424	8.30512	-0.28832
ENSG00000096654	ENSMUSG00000006720	ZNF184	6.58578	6.38997	5.33263	7.15439	3.14052	3.29753	3.22714	3.39487	2.89817	3.16191	4.15165	4.22173	0.0241495
ENSG00000096696	ENSMUSG00000054889	DSP	0.003186	0	0.006086	0.007435	0.008497	0.01759	0.002268	0	0	0	1	1.00945	0.0135718
ENSG00000096717	ENSMUSG00000020063	SIRT1	8.7121	8.9374	7.90773	10.0859	3.54081	4.35971	4.33103	6.02331	5.14598	5.36717	6.51215	5.07719	-0.359105
ENSG00000096872	ENSMUSG00000028576	IFT74	2.65848	2.8556	3.41141	3.09094	1.91345	1.60029	1.86342	1.74353	2.15373	1.86132	2.91953	2.79239	-0.0642344
ENSG00000096968	ENSMUSG00000024789	JAK2	3.5852	4.54855	4.97181	4.18045	1.89126	1.70134	1.61779	2.27	2.04302	2.49885	3.27062	2.73679	-0.257078
ENSG00000096996	ENSMUSG00000000791	IL12RB1	0	0	0	0	0	0	0	0	0	0	1	1	0
ENSG00000097007	ENSMUSG00000026842	ABL1	31.7586	32.5271	29.4294	30.8316	39.8069	37.2411	36.8335	47.5454	48.8887	51.7388	50.3909	38.9605	-0.371152
ENSG00000097033	ENSMUSG00000037062	SH3GLB1	15.6661	15.1445	14.39	16.0204	9.06478	8.58869	9.17639	14.3722	13.1382	13.9096	14.8067	9.94329	-0.574452
ENSG00000152377	ENSMUSG00000056222	SPOCK1	2.31867	2.23257	2.83128	2.39292	15.6837	15.6525	15.26	2.07349	2.47222	2.3965	3.31407	16.5321	2.31859
ENSG00000097096	ENSMUSG00000036863	SYDE2	0.047362	0.013344	0.023804	0.058163	0.292461	0.329916	0.255093	0.095872	0.130962	0.047363	1.0914	1.29249	0.243974
ENSG00000095739	ENSMUSG00000024232	BAMBI	1.71911	1.57054	1.43804	1.75468	8.20057	9.18894	8.00743	0.761196	0.93604	0.999493	1.89891	9.46565	2.31753
ENSG00000099203	ENSMUSG00000032180	TMED1	10.7801	12.8255	16.094	15.7824	29.5013	24.4704	26.425	26.5446	21.4007	22.7569	24.5674	27.7989	0.178281
ENSG00000099204	ENSMUSG00000025085	ABLIM1	2.72521	2.45621	3.08887	2.37662	9.09755	8.66249	9.39513	7.17294	7.46296	7.06736	8.23442	10.0517	0.287704
ENSG00000099219	ENSMUSG00000046324	ERMP1	5.95622	5.94138	5.78625	5.87951	4.69918	5.07382	4.8827	3.24029	3.43843	3.01746	4.23206	5.88523	0.47574
ENSG00000099246	ENSMUSG00000073639	RAB18	15.9759	16.4296	15.5086	19.4063	8.84065	8.3314	9.99483	9.25098	8.01401	8.80326	9.68942	10.0556	0.0535205
ENSG00000099250	ENSMUSG00000025810	NRP1	6.43832	7.32622	7.91958	7.21256	2.74465	2.6594	2.82172	4.11903	3.83065	4.12994	5.02654	3.74192	-0.425786
ENSG00000099260	ENSMUSG00000033377	PALMD	0.050715	0.045249	0.070783	0.067491	0.093622	0.110754	0.141362	0.335635	0.379244	0.336041	1.35031	1.11525	-0.275925
ENSG00000099282	ENSMUSG00000037031	TSPAN15	3.22927	3.40256	3.5765	3.84907	1.28085	0.901014	1.13884	1.75963	1.6207	1.5658	2.64871	2.1069	-0.330166
ENSG00000099284	ENSMUSG00000020086	H2AFY2	33.353	33.9564	32.3029	38.6354	29.4712	27.4987	31.0142	38.9513	39.0607	40.3326	40.4482	30.3281	-0.415424
ENSG00000099308	ENSMUSG00000031833	MAST3	3.4663	3.61394	3.10342	3.11333	5.41336	4.7476	5.54507	7.17099	7.07442	8.62237	8.62259	6.23534	-0.467652
ENSG00000099326	ENSMUSG00000030380	MZF1	3.45481	3.3551	3.28028	2.66099	6.86476	5.85229	5.96881	6.85986	7.76849	8.31943	8.64926	7.22862	-0.258857
ENSG00000099330	ENSMUSG00000002396	OCEL1	1.43792	1.52785	1.66589	1.68664	3.43934	4.06343	2.95446	3.23768	3.17769	3.72535	4.38024	4.48574	0.0343367
ENSG00000099331	ENSMUSG00000004677	MYO9B	13.5889	10.8488	12.348	8.90838	31.1861	26.5928	27.4773	48.3613	50.5692	49.6225	50.5177	29.4187	-0.780053
ENSG00000099337	ENSMUSG00000046410	KCNK6	0.010331	0.016556	0.049329	0.004018	0.105888	0.267843	0.133172	0.095363	0.026969	0.026173	1.0495	1.16897	0.155531
ENSG00000099364	ENSMUSG00000030811	FBXL19	10.6136	9.19557	9.81053	8.62957	22.1819	18.3346	19.4717	25.9869	24.865	25.7928	26.5482	20.996	-0.338499
ENSG00000099365	ENSMUSG00000030806	STX1B	5.00128	4.59474	4.34036	4.57932	4.59686	5.20309	4.24393	10.1037	10.2517	9.05154	10.8023	5.68129	-0.92705
ENSG00000099377	ENSMUSG00000042289	HSD3B7	2.13884	2.12553	2.4023	2.06233	2.50159	2.20016	1.6336	1.85245	1.73025	1.8495	2.81073	3.11178	0.146793
ENSG00000099381	ENSMUSG00000042308	SETD1A	6.33159	5.65926	5.94101	5.09267	11.1118	9.66301	9.02824	13.2991	13.6083	13.4848	14.4641	10.9343	-0.403605
ENSG00000099385	ENSMUSG00000030814	BCL7C	6.02065	6.06565	5.49443	7.10734	10.2588	11.7691	13.7278	17.6862	15.6415	16.3158	17.5478	12.9186	-0.441847
ENSG00000099617	ENSMUSG00000003070	EFNA2	7.28187	8.50019	7.47761	8.34286	10.0863	10.6389	9.96786	11.8093	10.5502	11.6619	12.3405	11.231	-0.135906
ENSG00000099622	ENSMUSG00000045193	CIRBP	43.2244	46.7592	44.1373	41.7247	51.5532	49.913	49.4369	54.0591	55.6417	62.1697	58.2902	51.3011	-0.184264
ENSG00000099624	ENSMUSG00000003072	ATP5D	19.1793	22.1436	19.8063	20.9514	48.2991	57.3327	50.2653	65.7162	68.9193	55.7841	64.4732	52.9657	-0.283642
ENSG00000099625	ENSMUSG00000035640	CBARP	13.7235	15.4152	15.7949	12.6303	34.1812	29.5931	32.7082	32.6121	33.5863	31.7579	33.6521	33.1608	-0.0212172
ENSG00000099769	ENSMUSG00000046070	IGFALS	0.222957	0.216583	0.164003	0.19486	0.453887	0.085442	0.364389	0.337882	0.238367	0.380301	1.31885	1.30124	-0.0193942
ENSG00000099785	ENSMUSG00000079557	2016-03-02	6.50389	7.99482	6.69541	7.90776	18.3356	24.0757	22.6887	16.0949	15.496	13.8461	16.1456	22.7	0.49155
ENSG00000099795	ENSMUSG00000033938	NDUFB7	54.9863	63.7829	58.6471	65.4305	101.215	118.065	105.024	123.871	125.783	106.882	119.845	109.101	-0.135503
ENSG00000099797	ENSMUSG00000031708	TECR	13.3727	14.9312	15.4129	16.2185	16.5133	18.438	17.2415	16.0222	16.4603	14.9307	16.8044	18.3976	0.130679
ENSG00000099800	ENSMUSG00000020219	TIMM13	13.4839	13.2869	11.8772	14.2273	46.2377	49.6714	49.2163	61.0566	55.7107	57.1542	58.9738	49.3752	-0.25629
ENSG00000099812	ENSMUSG00000035852	MISP	0.078414	0.033995	0.032092	0.069701	0.059741	0.035336	0	0.087891	0.076029	0.035474	1.06646	1.03169	-0.0478234
ENSG00000099814	ENSMUSG00000072825	CEP170B	3.89324	3.64643	3.20545	2.746	10.3918	9.31273	9.71312	10.0647	10.0431	10.568	11.2253	10.8059	-0.054932
ENSG00000099817	ENSMUSG00000004667	POLR2E	15.5854	15.811	15.6861	17.0555	45.074	45.3247	45.1618	54.8857	50.2492	50.9507	53.0285	46.1869	-0.199287
ENSG00000099821	ENSMUSG00000020329	POLRMT	6.5497	6.39033	6.20031	5.69903	17.9725	16.6923	15.3774	26.6314	25.6453	25.2026	26.8264	17.6807	-0.601478
ENSG00000099822	ENSMUSG00000020331	HCN2	2.33588	1.93352	1.72422	1.99198	1.65844	1.76886	1.89877	3.52538	3.77056	2.53182	4.27592	2.77536	-0.623561
ENSG00000099834	ENSMUSG00000025497	CDHR5	0.147995	0.062488	0.122182	0.057575	0.107252	0.077463	0.139389	0.183322	0.215625	0.153798	1.18425	1.10803	-0.0959686
ENSG00000099840	ENSMUSG00000055862	IZUMO4	1.72925	1.35329	1.07466	1.60355	2.16648	2.34959	2.37673	2.17859	2.5196	3.03551	3.5779	3.2976	-0.117697
ENSG00000099849	ENSMUSG00000038618	RASSF7	1.04655	1.33155	1.23373	1.33653	4.99506	4.45839	4.33413	2.51642	2.88415	2.62943	3.67666	5.59586	0.605963
ENSG00000169439	ENSMUSG00000022261	SDC2	9.95993	12.662	12.6401	14.5667	75.5154	73.9531	81.6793	15.4877	13.792	15.207	15.8289	78.0493	2.30182
ENSG00000099866	ENSMUSG00000020310	MADCAM1	0.231435	0.314223	0.227466	0.386706	0.569222	0.670581	0.500186	0.419151	0.689942	0.626226	1.57844	1.58	0.00142209
ENSG00000099875	ENSMUSG00000020190	MKNK2	11.0362	11.0175	11.2587	10.7301	15.9855	13.584	14.9244	24.2794	25.0364	25.1301	25.8153	15.8313	-0.705446
ENSG00000099889	ENSMUSG00000000325	ARVCF	19.0307	18.3996	18.6519	15.5021	36.5477	31.856	31.7037	42.0817	44.0323	46.5325	45.2155	34.3691	-0.395703
ENSG00000099899	ENSMUSG00000022721	TRMT2A	5.81953	5.11811	5.06681	4.76999	11.738	11.5686	10.8607	12.9617	12.9069	14.8425	14.5704	12.3891	-0.233971
ENSG00000099901	ENSMUSG00000005732	RANBP1	18.0799	18.463	16.4643	22.7803	19.7164	23.9333	21.1397	30.3266	30.3132	28.4376	30.6925	22.5965	-0.441787
ENSG00000099904	ENSMUSG00000060166	ZDHHC8	11.8507	11.4979	12.016	10.1428	19.0243	16.7486	17.9767	19.3333	20.2269	22.2552	21.6051	18.9165	-0.191725
ENSG00000099910	ENSMUSG00000022750	KLHL22	7.31058	7.82169	7.87613	7.03965	20.3938	20.3396	18.0814	20.5484	20.6675	19.5805	21.2655	20.605	-0.0455213
ENSG00000099917	ENSMUSG00000012114	MED15	4.5873	4.57865	4.63814	4.29624	11.9811	11.7718	10.8508	11.1869	11.5256	10.6448	12.1191	12.5346	0.0486313
ENSG00000099937	ENSMUSG00000022766	SERPIND1	0	0.027803	0.02406	0.018113	0	0	0	0.023256	0.010384	0.039892	1.02451	1	-0.034935
ENSG00000099940	ENSMUSG00000022765	SNAP29	7.22049	6.64245	7.21329	7.75061	9.01392	8.98231	9.46631	9.18185	9.92897	9.93612	10.6823	10.1542	-0.0731508
ENSG00000099942	ENSMUSG00000006134	CRKL	38.7304	36.2593	35.4455	37.4511	23.0293	25.5504	26.2129	40.0845	38.0536	38.6703	39.9361	25.9309	-0.623023
ENSG00000099949	ENSMUSG00000022761	LZTR1	7.1328	6.19394	6.36065	5.51837	12.7338	12.8439	11.688	14.1502	15.3515	15.058	15.8532	13.4219	-0.240188
ENSG00000099953	ENSMUSG00000000901	MMP11	1.76696	1.99574	2.69572	1.93349	2.86387	3.07087	3.65771	3.27707	3.27978	2.97987	4.17891	4.19748	0.00639848
ENSG00000099954	ENSMUSG00000071226	CECR2	9.72323	7.04223	7.48864	5.11258	2.93527	2.93351	2.62616	6.42923	6.08556	6.53203	7.34894	3.83165	-0.939572
ENSG00000099956	ENSMUSG00000000902	SMARCB1	38.321	35.7208	33.2941	40.4044	56.51	60.5989	51.423	84.7608	81.7491	80.392	83.3006	57.1773	-0.542885
ENSG00000099957	ENSMUSG00000022758	P2RX6	0.085976	0.036399	0.039984	0.059425	0.502974	0.401309	0.39197	0.080022	0.143745	0.027226	1.08366	1.43208	0.402199
ENSG00000099958	ENSMUSG00000009092	DERL3	0.444574	0.41153	0.447862	0.435648	1.75605	1.76099	2.15101	3.40844	3.06596	2.82403	4.09947	2.88935	-0.504694
ENSG00000099960	ENSMUSG00000022756	SLC7A4	0	0	0	0	0	0	0.093539	0.013728	0.006862	0	1.00686	1.03118	0.0344278
ENSG00000099968	ENSMUSG00000009112	BCL2L13	5.05081	5.03222	6.31587	5.11054	7.36292	7.42746	7.8109	5.74197	5.90534	5.82899	6.82543	8.53376	0.322261
ENSG00000099985	ENSMUSG00000058755	OSM	0	0	0	0.011833	0	0	0	0	0	0	1	1	0
ENSG00000099991	ENSMUSG00000020196	CABIN1	9.82932	8.62702	9.52232	7.3315	17.3664	16.7086	16.0168	19.7156	21.6062	18.9874	21.1031	17.6973	-0.253927
ENSG00000099992	ENSMUSG00000034412	TBC1D10A	1.45203	1.60383	1.67349	1.47028	4.78359	3.87169	3.66491	2.92767	2.91161	2.76805	3.86911	5.10673	0.400397
ENSG00000099994	ENSMUSG00000006342	SUSD2	0.243529	0.184168	0.207107	0.144521	0.674169	0.497606	0.585287	0.082479	0.152609	0.100321	1.1118	1.58569	0.512207
ENSG00000099995	ENSMUSG00000002129	SF3A1	18.8796	16.5508	17.0351	16.8514	21.1374	22.2193	19.174	26.8987	25.4337	25.8831	27.0718	21.8435	-0.309585
ENSG00000099998	ENSMUSG00000006344	GGT5	0.116413	0.138488	0.370719	0.14004	0.124166	0.110552	0	0.053691	0.019449	0.027526	1.03356	1.07824	0.0610618
ENSG00000099999	ENSMUSG00000003581	RNF215	5.94727	6.1575	7.16043	6.41726	11.2603	11.2425	11.9226	9.78378	11.2965	10.6133	11.5645	12.4751	0.109348
ENSG00000100012	ENSMUSG00000054986	SEC14L3	0	0.004226	0	0	0	0	0	0.005403	0	0.00278	1.00273	1	-0.00392983
ENSG00000100014	ENSMUSG00000033444	SPECC1L	12.272	10.742	11.436	10.3753	12.2743	11.7425	12.1503	15.4725	14.9473	15.5619	16.3272	13.0557	-0.322603
ENSG00000100023	ENSMUSG00000022771	PPIL2	9.06723	9.34891	8.38431	9.13316	10.3086	10.6372	9.59989	13.9078	13.9333	14.3838	15.075	11.1819	-0.430988
ENSG00000100024	ENSMUSG00000033427	UPB1	0.022121	0.01626	0.027393	0.028348	0	0.005389	0	0.014018	0.056273	0.011542	1.02728	1.0018	-0.0362369
ENSG00000100028	ENSMUSG00000020180	SNRPD3	16.993	16.6727	16.1946	19.0951	18.5343	23.7827	21.4893	28.5245	27.209	23.93	27.5545	22.2687	-0.307268
ENSG00000100029	ENSMUSG00000020430	PES1	8.22376	8.15311	8.9302	9.18729	16.8414	17.6577	16.8849	24.645	22.2506	22.3537	24.0831	18.128	-0.409802
ENSG00000100030	ENSMUSG00000063358	MAPK1	19.4928	19.697	18.7795	20.9316	19.6105	19.4359	20.8002	21.7551	22.6946	22.1209	23.1902	20.9489	-0.146644
ENSG00000100034	ENSMUSG00000026181	PPM1F	3.55471	3.27238	2.98772	3.04602	7.02703	7.68624	7.6493	8.97239	8.78834	9.48204	10.0809	8.45419	-0.253889
ENSG00000100036	ENSMUSG00000048807	SLC35E4	1.42865	1.75242	1.68873	1.60647	2.89521	3.5553	2.83617	2.12209	1.66121	1.83203	2.87178	4.09556	0.512118
ENSG00000100038	ENSMUSG00000022779	TOP3B	3.92342	3.47721	3.47761	3.18942	4.54123	4.19834	4.08429	6.62218	7.03571	7.12216	7.92668	5.27462	-0.587651
ENSG00000100053	ENSMUSG00000029352	CRYBB3	0.03685	0	0.043813	0.04043	0.197826	0.122209	0.039601	0	0	0.070481	1.02349	1.11988	0.12984
ENSG00000100055	ENSMUSG00000018008	CYTH4	0	0	0	0	0	0	0	0	0	0	1	1	0
ENSG00000100056	ENSMUSG00000003527	DGCR14	3.98191	4.12442	4.01154	4.20916	6.41268	6.74516	6.14659	8.17066	8.22827	8.79314	9.39735	7.43481	-0.337959
ENSG00000100060	ENSMUSG00000018169	MFNG	8.35477	8.42908	6.94557	9.20935	0.387629	0.558611	0.290678	1.12673	1.06035	1.05316	2.08008	1.41231	-0.558584
ENSG00000129038	ENSMUSG00000032334	LOXL1	2.85724	3.61005	4.07742	3.3747	15.8996	16.1913	16.1948	2.44872	2.54145	2.61765	3.53594	17.0953	2.27343
ENSG00000100075	ENSMUSG00000003528	SLC25A1	16.773	16.6102	17.0266	17.9012	97.0909	106.473	91.9358	101.39	99.0711	91.5998	98.3536	99.4998	0.0167155
ENSG00000100077	ENSMUSG00000042249	GRK3	0.238938	0.190184	0.263371	0.188034	0.256542	0.310397	0.380127	0.9086	0.868317	0.87486	1.88393	1.31569	-0.517924
ENSG00000100078	ENSMUSG00000034579	PLA2G3	0.196758	0.095756	0.376689	0.102022	0.190784	0.630068	0.152764	1.40415	1.92652	1.61355	2.64807	1.32454	-0.999454
ENSG00000100079	ENSMUSG00000043501	LGALS2	0.033557	0.064451	0.123532	0.085869	0.566927	0.412098	0.313023	0	0.157941	0.220317	1.12609	1.43068	0.345387
ENSG00000100083	ENSMUSG00000033128	GGA1	5.07432	4.86831	4.92644	4.95153	9.03102	8.21219	8.59356	10.5256	10.9254	10.4657	11.6389	9.61226	-0.276008
ENSG00000100084	ENSMUSG00000022702	HIRA	14.4995	13.1354	13.8395	14.0203	20.8776	21.1808	20.198	32.8959	34.2649	31.8106	33.9904	21.7521	-0.643974
ENSG00000100092	ENSMUSG00000022436	SH3BP1	5.69802	6.2047	5.48325	6.7354	9.4905	9.65358	8.96418	11.4925	11.3635	10.8029	12.2196	10.3694	-0.236866
ENSG00000165072	ENSMUSG00000033207	MAMDC2	6.28398	7.27965	14.5047	8.23144	5.24091	5.35417	5.35929	0.264362	0.314513	0.354698	1.31119	6.31812	2.26862
ENSG00000100097	ENSMUSG00000068220	LGALS1	50.5294	53.9429	56.8935	60.0991	134.829	176.622	137.355	186.55	177.979	147.7	171.743	150.602	-0.189505
ENSG00000100099	ENSMUSG00000042328	HPS4	6.18285	6.46458	6.78147	5.75652	3.87529	4.61964	4.11119	5.126	5.44739	5.52296	6.36545	5.20204	-0.291185
ENSG00000100100	ENSMUSG00000034614	PIK3IP1	10.2803	11.083	9.42471	11.6879	5.28208	5.95523	6.74674	3.11242	2.72017	2.9024	3.91166	6.99468	0.838476
ENSG00000100104	ENSMUSG00000029346	SRRD	5.59042	5.23543	5.68072	5.50665	6.38082	7.3888	8.17842	8.62789	8.31613	7.69624	9.21342	8.31601	-0.147844
ENSG00000100105	ENSMUSG00000020453	PATZ1	16.9643	17.1522	16.2559	17.2059	15.8678	15.6151	15.176	25.1385	26.1914	26.2471	26.859	16.553	-0.698316
ENSG00000100106	ENSMUSG00000033088	TRIOBP	4.05575	3.87857	4.16853	3.74229	12.5143	12.3381	12.3353	13.7336	14.444	13.7239	14.9672	13.3959	-0.160011
ENSG00000100116	ENSMUSG00000006378	GCAT	7.55949	7.76627	7.76208	8.02371	14.1626	16.2129	14.9739	23.8173	23.6403	23.6927	24.7168	16.1164	-0.616957
ENSG00000100122	ENSMUSG00000029343	CRYBB1	0	0	0.007884	0.00896	0	0.087821	0	0	0.078689	0.036967	1.03855	1.02927	-0.0129468
ENSG00000100124	ENSMUSG00000033055	ANKRD54	4.29547	4.1213	4.00065	4.28009	10.3818	11.1314	9.13249	9.21301	10.1849	10.022	10.8066	11.2152	0.0535414
ENSG00000100139	ENSMUSG00000033039	MICALL1	4.78088	4.82544	4.19835	3.96937	30.0934	29.482	26.6639	15.5467	15.4223	13.8745	15.9478	29.7464	0.899357
ENSG00000100142	ENSMUSG00000033020	POLR2F	4.71689	5.03102	4.72295	5.75656	8.54045	7.73933	7.83972	9.88857	9.44947	9.08007	10.4727	9.03983	-0.212266
ENSG00000100146	ENSMUSG00000033006	SOX10	0.403723	0.170514	0.363371	0.238421	0.125879	0.077493	0.069529	0.125607	0.238051	0.051147	1.13827	1.09097	-0.0612332
ENSG00000100147	ENSMUSG00000068114	CCDC134	3.80504	2.53012	3.43158	2.48611	4.86163	4.33781	3.96564	3.84862	3.28307	3.98697	4.70622	5.38836	0.195277
ENSG00000100150	ENSMUSG00000037426	DEPDC5	2.2701	2.00102	2.13204	1.91943	1.94589	2.49153	2.14401	2.90517	2.90112	2.96758	3.92462	3.19381	-0.297275
ENSG00000100151	ENSMUSG00000068206	PICK1	0.962565	1.39481	1.60289	1.3544	2.45178	2.67681	2.62339	1.73445	1.7688	1.5414	2.68155	3.58399	0.418499
ENSG00000100154	ENSMUSG00000033209	TTC28	9.203	8.05222	7.94962	6.80201	7.52242	6.86881	7.48303	11.353	12.0597	11.5099	12.6409	8.29142	-0.608403
ENSG00000100156	ENSMUSG00000032988	SLC16A8	0.121304	0.205149	0.182152	0.060508	0.450037	0.493912	1.01282	0.175359	0.445922	0.316556	1.31261	1.65226	0.331996
ENSG00000100162	ENSMUSG00000068101	CENPM	4.90276	5.38388	4.74885	5.39272	18.5222	23.5542	21.6653	26.3525	25.4714	24.595	26.473	22.2472	-0.250895
ENSG00000100167	ENSMUSG00000022456	2016-09-03	50.245	50.2481	45.2764	51.2605	31.7365	32.623	30.2211	54.2027	55.5437	55.7299	56.1588	32.5269	-0.787878
ENSG00000100170	ENSMUSG00000011034	SLC5A1	0.010681	0.005425	0.005807	0.014188	0	0.067135	0	0	0	0.019256	1.00642	1.02238	0.0226986
ENSG00000100196	ENSMUSG00000010830	KDELR3	1.27291	1.95338	1.96032	1.99936	3.41025	3.13131	3.0403	2.03508	1.71052	2.07846	2.94135	4.19395	0.511831
ENSG00000100201	ENSMUSG00000055065	DDX17	95.7354	105.313	90.4146	81.8293	41.9573	36.3037	38.8691	50.8637	52.3523	61.3183	55.8448	40.0433	-0.47986
ENSG00000100206	ENSMUSG00000022429	DMC1	0.203961	0.217239	0.260366	0.148299	0.02835	0.020961	0.007567	0.05234	0.138766	0.087536	1.09288	1.01896	-0.101039
ENSG00000100207	ENSMUSG00000041852	TCF20	10.1153	9.19239	9.65556	7.86318	9.15013	8.5569	8.77311	9.22988	9.35627	9.6947	10.4269	9.82671	-0.0855361
ENSG00000100209	ENSMUSG00000043510	HSCB	2.28069	3.14653	2.10789	3.42954	4.77675	4.11396	4.49019	3.79561	3.18875	3.23633	4.4069	5.4603	0.309216
ENSG00000100211	ENSMUSG00000022428	CBY1	7.70367	7.73248	7.25683	7.92697	10.2594	10.3818	12.3949	10.892	10.1606	10.9228	11.6585	12.012	0.0431019
ENSG00000100216	ENSMUSG00000022427	TOMM22	22.2199	22.8835	19.0737	27.5925	19.5644	21.6181	23.2411	29.0716	25.5634	26.2924	27.9758	22.4745	-0.315886
ENSG00000100218	ENSMUSG00000009070	RSPH14	1.10935	1.10347	1.38958	1.35882	1.36996	1.30021	1.32832	1.46379	0.956184	1.18246	2.20081	2.33283	0.0840467
ENSG00000100219	ENSMUSG00000020484	XBP1	10.7925	11.4561	14.3485	13.3696	16.5729	16.9978	18.3871	19.3918	19.1508	19.1102	20.2176	18.3193	-0.142248
ENSG00000100220	ENSMUSG00000001783	RTCB	16.8783	16.7704	17.3069	18.8566	22.0137	25.6516	21.8182	27.2829	25.9078	25.3329	27.1745	24.1612	-0.169564
ENSG00000100221	ENSMUSG00000022426	JOSD1	14.0804	14.2078	14.2308	14.3261	13.5728	12.5773	14.1549	16.0107	17.3801	16.8697	17.7535	14.435	-0.298533
ENSG00000100225	ENSMUSG00000001786	FBXO7	8.03989	8.74353	7.79833	8.80191	6.4791	6.62088	6.87068	7.87669	7.54995	7.70255	8.70973	7.65689	-0.18587
ENSG00000100226	ENSMUSG00000042535	GTPBP1	14.5697	14.3196	15.056	13.4951	16.665	15.8346	15.9729	23.9488	24.4166	23.9609	25.1088	17.1575	-0.54935
ENSG00000105227	ENSMUSG00000053198	PRX	0.336988	0.330425	0.419174	0.327476	13.8952	12.6674	13.8076	1.9129	1.96881	2.13921	3.00697	14.4567	2.26535
ENSG00000100239	ENSMUSG00000036561	PPP6R2	13.4558	12.1026	11.8665	11.3936	24.7193	23.9589	22.4931	28.1225	29.0909	28.7798	29.6644	24.7238	-0.262832
ENSG00000100241	ENSMUSG00000036529	SBF1	19.2241	15.3406	16.4749	12.2187	47.0944	46.2301	42.5625	72.6931	70.8192	70.4381	72.3168	46.2957	-0.643453
ENSG00000100242	ENSMUSG00000042524	SUN2	24.5302	23.0816	21.1448	20.3189	22.3879	20.7339	21.3168	25.2377	24.8798	25.112	26.0765	22.4795	-0.214137
ENSG00000100243	ENSMUSG00000018042	CYB5R3	15.3585	17.054	16.5673	17.6746	43.1651	42.0121	40.0203	41.3399	41.5486	42.5636	42.8173	42.7325	-0.002862
ENSG00000100246	ENSMUSG00000022420	DNAL4	4.64362	5.58568	4.73707	5.4173	8.37725	8.03263	7.69958	8.51098	8.08294	7.25168	8.94853	9.03649	0.014111
ENSG00000100253	ENSMUSG00000022613	MIOX	0	0	0.021713	0	0.018613	0	0	0	0.037396	0	1.01247	1.0062	-0.0089492
ENSG00000100258	ENSMUSG00000022614	LMF2	19.3148	20.9266	19.2877	17.8038	57.6858	54.6188	51.473	45.3421	45.8852	45.5958	46.6077	55.5925	0.254322
ENSG00000100263	ENSMUSG00000034175	RHBDD3	9.01007	10.184	11.0129	9.71532	20.2671	19.4838	18.0433	14.598	13.9717	15.4191	15.6629	20.2647	0.371618
ENSG00000100266	ENSMUSG00000016664	PACSIN2	9.77543	8.72282	10.0345	8.66421	19.2842	19.1584	18.0967	23.3399	22.6253	20.1049	23.0233	19.8464	-0.214217
ENSG00000100271	ENSMUSG00000022442	TTLL1	7.49104	7.78057	8.32061	8.55592	10.9594	11.9482	10.8616	13.4374	12.5841	12.4853	13.8356	12.2564	-0.174846
ENSG00000100276	ENSMUSG00000034209	RASL10A	0.06883	0.145854	0.098595	0.026767	0.412958	0.484418	0.391895	0.541648	0.739684	0.907433	1.72959	1.42976	-0.274659
ENSG00000100280	ENSMUSG00000009090	AP1B1	13.1589	13.4665	13.9925	12.98	23.6873	23.9966	23.2652	30.249	29.9888	28.7012	30.6464	24.6497	-0.314145
ENSG00000100281	ENSMUSG00000034518	HMGXB4	6.44933	6.79582	6.77827	7.20568	5.74542	6.21327	7.24286	8.84502	7.73082	7.74605	9.1073	7.40052	-0.299397
ENSG00000100285	ENSMUSG00000020396	NEFH	0.489392	0.474075	0.488178	0.335134	0.493055	0.8047	0.326728	1.18513	1.18066	1.36079	2.24219	1.54149	-0.54058
ENSG00000100290	ENSMUSG00000016758	BIK	0.267978	0.23355	0.09032	0.302711	0.241248	0.102952	0.532661	0.041534	0.151962	0.060465	1.08465	1.29229	0.252692
ENSG00000147852	ENSMUSG00000024924	VLDLR	12.582	13.3133	15.6495	12.7471	35.8524	39.6387	36.8101	7.14908	6.74667	7.17439	8.02338	38.4338	2.26009
ENSG00000100294	ENSMUSG00000048755	MCAT	4.61478	4.03203	4.05412	5.09766	13.3834	12.6413	14.9819	18.1234	18.3098	15.6678	18.367	14.6689	-0.324359
ENSG00000100296	ENSMUSG00000034274	THOC5	4.22566	4.37476	4.13545	4.27445	4.28938	4.08172	3.76869	4.92644	4.87001	4.64751	5.81465	5.0466	-0.204383
ENSG00000100298	ENSMUSG00000009585	APOBEC3H	0.006934	0	0.012275	0	0	0	0.256153	0	0	0	1	1.08538	0.118206
ENSG00000100299	ENSMUSG00000022620	ARSA	14.1709	15.9239	15.0603	14.1225	29.1682	28.9109	28.8001	18.0683	18.9879	20.357	20.1377	29.9597	0.573123
ENSG00000100300	ENSMUSG00000041736	TSPO	16.9792	19.5805	17.7226	20.4897	44.7169	48.2725	46.8948	58.5245	60.5109	57.5488	59.8614	47.6281	-0.329813
ENSG00000100302	ENSMUSG00000034472	RASD2	1.46801	1.94442	1.62117	1.71289	1.10983	1.21535	1.33498	0.532037	0.571297	0.899716	1.66768	2.22005	0.412748
ENSG00000204248	ENSMUSG00000024330	COL11A2	0.980858	0.739945	1.25106	0.790428	10.9187	10.4445	10.1068	1.07054	1.31968	1.81902	2.40308	11.49	2.25742
ENSG00000100307	ENSMUSG00000053411	CBX7	1.1609	1.36261	1.11489	0.886396	0.84892	0.741059	0.744535	0.692993	0.962071	0.943778	1.86628	1.77817	-0.0697716
ENSG00000137331	ENSMUSG00000003541	IER3	0.403198	1.10303	2.10637	0.967855	7.44833	7.65583	9.10558	1.1681	0.935612	0.593841	1.89918	9.06991	2.25571
ENSG00000100312	ENSMUSG00000022622	ACR	0	0.00651	0.059763	0.024297	0	0	0	0.057672	0.011374	0.049463	1.0395	1	-0.0558939
ENSG00000100314	ENSMUSG00000009075	CABP7	2.06262	2.15497	2.04454	2.33563	3.56088	3.55913	4.01348	3.22851	2.76403	2.81402	3.93552	4.71116	0.25953
ENSG00000100316	ENSMUSG00000060036	RPL3	129.275	114.339	89.4907	136.317	236.114	263.415	238.852	308.7	305.298	285.822	300.94	247.127	-0.284224
ENSG00000100319	ENSMUSG00000009076	ZMAT5	3.26837	3.29579	3.58608	3.9667	7.15221	6.29731	7.28047	6.7913	5.48516	6.02194	7.09947	7.91	0.155966
ENSG00000100320	ENSMUSG00000033565	RBFOX2	15.1638	13.0655	13.2856	11.7976	8.53908	9.18747	9.28745	15.5234	17.3424	17.3548	17.7402	10.0047	-0.826349
ENSG00000100321	ENSMUSG00000022415	SYNGR1	6.4176	7.38379	7.2846	6.767	7.18396	6.21802	6.72285	7.70342	8.23732	9.17067	9.37047	7.70828	-0.281713
ENSG00000100324	ENSMUSG00000022414	TAB1	9.55358	10.3643	10.2224	9.88077	16.0227	15.3095	15.6461	22.9636	20.9921	21.7348	22.8968	16.6594	-0.458811
ENSG00000100325	ENSMUSG00000020412	ASCC2	5.53017	5.31091	5.28967	5.52317	9.88342	11.72	11.2778	13.0716	13.2785	11.7008	13.6836	11.9604	-0.194182
ENSG00000100330	ENSMUSG00000034354	MTMR3	11.3678	10.6743	11.3434	9.3533	8.88902	9.90459	8.57743	16.8867	16.7014	17.8287	18.1389	10.1237	-0.841355
ENSG00000100335	ENSMUSG00000022412	MIEF1	7.5442	7.23139	7.94409	6.87673	8.67521	9.73071	9.19276	11.9925	12.1622	12.1781	13.1109	10.1996	-0.362263
ENSG00000100341	ENSMUSG00000018868	PNPLA5	0	0	0	0	0	0	0	0	0	0	1	1	0
ENSG00000130176	ENSMUSG00000001349	CNN1	0.060689	0.117161	0.156749	0.149279	5.70592	5.53996	6.36023	0.505047	0.445619	0.39468	1.44845	6.86871	2.24553
ENSG00000100345	ENSMUSG00000022443	MYH9	19.555	16.016	19.3605	13.8052	103.682	101.162	97.4931	55.8083	52.814	51.2101	54.2775	101.779	0.907014
ENSG00000100346	ENSMUSG00000022416	CACNA1I	0.02668	0.018514	0.011324	0.013834	0.065213	0.06312	0.086501	0.048342	0.072679	0.052657	1.05789	1.07161	0.0185885
ENSG00000100347	ENSMUSG00000022437	SAMM50	4.00368	4.11174	3.98796	4.43511	6.3959	6.71601	6.60176	7.38433	7.38421	7.31799	8.36218	7.57122	-0.143352
ENSG00000100348	ENSMUSG00000005354	TXN2	20.6655	20.1896	19.5201	23.4842	27.9558	32.8635	32.5968	41.0642	40.5726	35.1033	39.9134	32.1387	-0.31256
ENSG00000100350	ENSMUSG00000016552	FOXRED2	19.9944	20.5889	25.0693	19.4077	31.2502	33.0779	30.9694	31.9868	32.4455	31.3401	32.9241	32.7658	-0.00695279
ENSG00000100351	ENSMUSG00000042351	GRAP2	0.002598	0	0	0.008082	0	0	0	0.003197	0.002713	0.006581	1.00416	1	-0.00599443
ENSG00000100353	ENSMUSG00000016554	EIF3D	20.111	19.5204	19.1112	23.1674	28.163	30.1914	26.4127	35.9004	35.5879	33.0261	35.8381	29.2557	-0.292777
ENSG00000100354	ENSMUSG00000047888	TNRC6B	5.8188	5.13578	5.67475	4.43289	4.03839	4.07907	4.79646	5.07309	4.40715	5.12648	5.86891	5.30464	-0.145836
ENSG00000100359	ENSMUSG00000042303	SGSM3	9.63396	8.73982	8.92027	8.28024	21.399	22.8548	19.1587	25.7309	25.763	25.1319	26.5419	22.1375	-0.261781
ENSG00000100360	ENSMUSG00000016637	IFT27	5.76334	6.10446	5.53456	4.99095	3.22986	2.62181	2.74248	4.66599	4.90029	5.27694	5.94774	3.86471	-0.621979
ENSG00000100362	ENSMUSG00000005716	PVALB	0	0	0	0	0	0.012077	0	0	0	0	1	1.00403	0.00579615
ENSG00000100364	ENSMUSG00000036046	KIAA0930	3.64651	3.77556	4.25511	3.72594	7.90763	6.91258	7.95803	9.38609	8.92199	8.0886	9.79889	8.59275	-0.189499
ENSG00000100365	ENSMUSG00000071715	NCF4	0	0	0	0	0	0	0	0.014212	0	0	1.00474	1	-0.00681839
ENSG00000100372	ENSMUSG00000022404	SLC25A17	4.97414	4.74301	4.57092	5.66978	3.70001	4.77224	4.86516	4.36425	4.40495	4.55892	5.44271	5.4458	0.000819892
ENSG00000100373	ENSMUSG00000022435	UPK3A	0	0	0	0	0	0	0	0	0	0	1	1	0
ENSG00000100376	ENSMUSG00000022434	FAM118A	1.18955	1.21221	1.2656	1.19742	1.90219	2.02486	2.10206	1.62888	1.66529	1.70453	2.66623	3.0097	0.174817
ENSG00000100379	ENSMUSG00000033287	KCTD17	8.23244	8.61238	8.37063	8.89015	23.6566	21.7624	23.1317	28.7034	26.3803	29.5912	29.225	23.8502	-0.293199
ENSG00000100385	ENSMUSG00000068227	IL2RB	0.027371	0.030526	0.078414	0.042577	0	0.059359	0.0487	0.008422	0	0	1.00281	1.03602	0.0470069
ENSG00000100387	ENSMUSG00000022400	RBX1	9.64978	9.60307	10.315	13.5482	9.55947	11.086	9.19458	13.2372	12.8288	12.4456	13.8372	10.9467	-0.338057
ENSG00000100393	ENSMUSG00000055024	EP300	19.7858	17.7304	17.5718	14.6094	13.7731	14.5226	11.9924	14.206	16.4839	15.0364	16.2421	14.4294	-0.170729
ENSG00000100395	ENSMUSG00000022394	L3MBTL2	4.72812	4.69147	4.632	4.50595	6.49213	6.75608	6.20725	8.18458	8.31833	8.66479	9.38924	7.48515	-0.326976
ENSG00000100399	ENSMUSG00000063765	CHADL	1.9971	2.06002	2.30736	2.03184	1.38734	1.67444	1.32581	2.4631	2.49397	2.42018	3.45908	2.46253	-0.490249
ENSG00000100401	ENSMUSG00000022391	RANGAP1	14.7457	13.4811	14.0479	14.8136	47.1316	51.0299	45.3554	46.1658	42.9269	41.0226	44.3718	48.839	0.138392
ENSG00000100403	ENSMUSG00000022390	ZC3H7B	15.0965	14.6396	15.5129	13.0391	28.9323	26.522	26.2144	29.333	28.605	29.2228	30.0536	28.2229	-0.0906708
ENSG00000100410	ENSMUSG00000061360	PHF5A	16.903	16.029	16.0765	19.9785	12.1768	12.8269	15.375	16.733	16.6976	16.6977	17.7094	14.4596	-0.292491
ENSG00000100412	ENSMUSG00000022477	ACO2	39.5455	44.6426	45.0805	44.2557	55.4044	55.2972	53.5016	58.2301	58.3753	55.0832	58.2295	55.7344	-0.0631833
ENSG00000100413	ENSMUSG00000022476	POLR3H	14.1496	15.957	15.0783	16.4603	25.9967	26.7497	24.7617	25.8787	24.9825	24.0393	25.9668	26.836	0.0475003
ENSG00000100416	ENSMUSG00000022386	TRMU	3.63806	3.4086	3.08093	3.14049	5.82825	5.70455	5.45761	6.41306	6.97297	7.97505	8.12036	6.66347	-0.285271
ENSG00000100417	ENSMUSG00000022474	PMM1	3.47184	3.87296	3.23243	4.24318	7.92607	8.71578	6.65232	9.21544	9.25	8.39091	9.95212	8.76472	-0.183295
ENSG00000100418	ENSMUSG00000022472	DESI1	5.77447	5.7431	5.16283	5.68728	11.5384	11.0608	12.1628	10.1054	10.7285	11.0725	11.6354	12.5873	0.113447
ENSG00000100422	ENSMUSG00000035891	CERK	15.0964	13.9295	11.9251	13.2761	26.8312	29.6998	28.947	19.2178	20.5419	21.1504	21.3033	29.4927	0.469277
ENSG00000100425	ENSMUSG00000022387	BRD1	9.78179	9.76481	8.95001	9.24198	12.3593	12.5771	12.5129	16.0191	17.1382	16.9375	17.6983	13.4831	-0.392456
[truncated: 12,596 more rows]

## Sheet: Mouse-IUE-2way
Human	Mouse	C1-24hrs	C2-24hrs	C1-48hrs	C2-48hrs	DNM1-24hrs	DNM2-24hrs	DNM1-48hrs	DNM2-48hrs	NGN1-24hrs	NGN2-24hrs	NGN1-48hrs	NGN2-48hrs
[truncated: 14,564 more rows]

[truncated: 2 more sheets: DEX-Logistic-TFBS, DEX-miR]
